# Supplementary material for: The Genetic Architecture of Murine Glutathione Transferases
Source: PLoS One. 2016 Feb 1;11(2):e0148230. doi: 10.1371/journal.pone.0148230 (PMC4734686; doi:10.1371/journal.pone.0148230)
Supplement: S5 Table — (XLSX) [file pone.0148230.s011.xlsx]

## Sheet: S5 Table
S5 Table. Significantly enriched GO Categories in the top 500 correlates of Gstz1 in hippocampus and midbrain.
User file and parameters: User file: thirdpartyUNgwxU.txt, Organism: mmusculus, Id Type: affy_mouse430_2, Ref Set: affy_mouse430_2, Significance Level: Top10, Statistics Test: Hypergeometric, MTC: BH, Minimum: 2											User file and parameters: User file: thirdpartyqKf9Is.txt, Organism: mmusculus, Id Type: agilent_SurePrintG3, Ref Set: agilent_SurePrintG3, Significance Level: Top10, Statistics Test: Hypergeometric, MTC: BH, Minimum: 2
											MIDBRAIN
The results for each enriched GO category are listed in this table. For each GO category, the first row lists its sub-root											The results for each enriched GO category are listed in this table. For each GO category, the first row lists its sub-root
(biological process, molecular function, or cellular component), category name, and corresponding GO ID. The second row lists											(biological process, molecular function, or cellular component), category name, and corresponding GO ID. The second row lists
number of reference genes in the category (C), number of genes in the gene set and also in the category (O), expected number in the											number of reference genes in the category (C), number of genes in the gene set and also in the category (O), expected number in the
category (E), Ratio of enrichment (R), p value from hypergeometric test (rawP), and p value adjusted by the multiple test adjustment (adjP).											category (E), Ratio of enrichment (R), p value from hypergeometric test (rawP), and p value adjusted by the multiple test adjustment (adjP).
Finally, genes in the category are listed. For each gene, the table lists the user uploaded ID and value (optional), Entrez ID,											Finally, genes in the category are listed. For each gene, the table lists the user uploaded ID and value (optional), Entrez ID,
Ensembl Gene Stable ID, Gene symbol, and description.											Ensembl Gene Stable ID, Gene symbol, and description.
Hippocampus
biological process	generation of precursor metabolites and energy	GO:0006091
C=269;O=23;E=6.07;R=3.79;rawP=4.93e-08;adjP=7.42e-05
Probe Set ID	R	Gene Symbol	Description	Entrez ID	Ensemble Gene Stable ID
1451312_at	0.5365	Ndufs7	NADH dehydrogenase (ubiquinone) Fe-S protein 7	75406	ENSMUSG00000020153
1416834_x_at	0.4474	Ndufb2	NADH dehydrogenase (ubiquinone) 1 beta subcomplex, 2	68198	ENSMUSG00000002416
1448483_a_at	0.3949	Ndufb2	NADH dehydrogenase (ubiquinone) 1 beta subcomplex, 2	68198	ENSMUSG00000002416
1423299_at	0.4198	Txnl1	thioredoxin-like 1	53382	ENSMUSG00000024583
1430326_s_at	0.4346	Uqcrq	ubiquinol-cytochrome c reductase, complex III subunit VII	22272	ENSMUSG00000044894
1427282_a_at	0.3939	Fxn	frataxin	14297	ENSMUSG00000059363
1422976_x_at	0.4927	Ndufa7	NADH dehydrogenase (ubiquinone) 1 alpha subcomplex, 7 (B14.5a)	66416	ENSMUSG00000041881
1455749_x_at	0.4688	Ndufa7	NADH dehydrogenase (ubiquinone) 1 alpha subcomplex, 7 (B14.5a)	66416	ENSMUSG00000041881
1428360_x_at	0.527	Ndufa7	NADH dehydrogenase (ubiquinone) 1 alpha subcomplex, 7 (B14.5a)	66416	ENSMUSG00000041881
1450818_a_at	0.4138	Ndufa7	NADH dehydrogenase (ubiquinone) 1 alpha subcomplex, 7 (B14.5a)	66416	ENSMUSG00000041881
1436567_a_at	0.5276	Ndufa7	NADH dehydrogenase (ubiquinone) 1 alpha subcomplex, 7 (B14.5a)	66416	ENSMUSG00000041881
1424364_a_at	0.4175	Uqcr10	ubiquinol-cytochrome c reductase, complex III subunit X	66152	ENSMUSG00000059534
1416849_at	0.4703	Cisd1	CDGSH iron sulfur domain 1	52637	ENSMUSG00000037710
1448427_at	0.4803	Ndufa6	NADH dehydrogenase (ubiquinone) 1 alpha subcomplex, 6 (B14)	67130	ENSMUSG00000022450
1451088_a_at	0.4332	Oxa1l	oxidase assembly 1-like	69089	ENSMUSG00000000959
1448292_at	0.4089	Uqcr11	ubiquinol-cytochrome c reductase, complex III subunit XI	66594	ENSMUSG00000020163
1448119_at	0.4632	Bpgm	2,3-bisphosphoglycerate mutase	12183	ENSMUSG00000038871
1415864_at	0.434	Bpgm	2,3-bisphosphoglycerate mutase	12183	ENSMUSG00000038871
1419428_a_at	0.4187	Gaa	glucosidase, alpha, acid	14387	ENSMUSG00000025579
1449137_at	0.4309	Pdha1	pyruvate dehydrogenase E1 alpha 1	18597	ENSMUSG00000031299
1430634_a_at	0.4225	Pfkp	phosphofructokinase, platelet	56421	ENSMUSG00000021196
1433984_a_at	-0.4061	Mdh2	malate dehydrogenase 2, NAD (mitochondrial)	17448	ENSMUSG00000019179
1450048_a_at	0.4154	Idh2	isocitrate dehydrogenase 2 (NADP+), mitochondrial	269951	ENSMUSG00000030541
1419647_a_at	0.46	Ier3	immediate early response 3	15937	ENSMUSG00000003541
1417341_a_at	0.4526	Ppp1r2	protein phosphatase 1, regulatory (inhibitor) subunit 2	66849	ENSMUSG00000047714
1416593_at	0.4554	Glrx	glutaredoxin	93692	ENSMUSG00000021591
1416837_at	0.4039	Bax	BCL2-associated X protein	12028	ENSMUSG00000003873
1416335_at	0.4628	Mif	macrophage migration inhibitory factor	17319	ENSMUSG00000033307
1416789_at	0.4437	Idh3g	isocitrate dehydrogenase 3 (NAD+), gamma	15929	ENSMUSG00000002010
biological process	mitochondrion organization	GO:0007005
C=202;O=16;E=4.56;R=3.51;rawP=1.45e-05;adjP=0.0066
Probe Set ID	R	Gene Symbol	Description	Entrez ID	Ensemble Gene Stable ID
1448853_at	-0.5083	Synj2bp	synaptojanin 2 binding protein	24071	ENSMUSG00000090935
1451312_at	0.5365	Ndufs7	NADH dehydrogenase (ubiquinone) Fe-S protein 7	75406	ENSMUSG00000020153
1418185_at	0.5046	Ndufaf3	NADH dehydrogenase (ubiquinone) 1 alpha subcomplex, assembly factor 3	66706	ENSMUSG00000070283
1427282_a_at	0.3939	Fxn	frataxin	14297	ENSMUSG00000059363
1451504_at	0.3938	Chchd3	coiled-coil-helix-coiled-coil-helix domain containing 3	66075	ENSMUSG00000053768
1448887_x_at	0.4983	Fxc1	fractured callus expressed transcript 1	14356	ENSMUSG00000089847
1436416_x_at	0.5577	Fxc1	fractured callus expressed transcript 1	14356	ENSMUSG00000089847
1417916_a_at	0.6189	Fxc1	fractured callus expressed transcript 1	14356	ENSMUSG00000089847
1418002_at	0.479	Higd2a	HIG1 domain family, member 2A	67044	ENSMUSG00000025868
1416313_at	-0.4669	Mllt11	myeloid/lymphoid or mixed-lineage leukemia (trithorax homolog, Drosophila); translocated to, 11	56772	ENSMUSG00000053192
1451088_a_at	0.4332	Oxa1l	oxidase assembly 1-like	69089	ENSMUSG00000000959
1416764_at	0.4158	Fis1	fission 1 (mitochondrial outer membrane) homolog (yeast)	66437	ENSMUSG00000019054
1455006_at	0.5302	2310016M24Rik	RIKEN cDNA 2310016M24 gene	66379	ENSMUSG00000023020
1416837_at	0.4039	Bax	BCL2-associated X protein	12028	ENSMUSG00000003873
1423128_at	0.4028	Aip	aryl-hydrocarbon receptor-interacting protein	11632	ENSMUSG00000024847
1416583_at	0.4059	Bad	BCL2-associated agonist of cell death	12015	ENSMUSG00000024959
1452048_at	0.3927	Mrpl12	mitochondrial ribosomal protein L12	56282	ENSMUSG00000039640
1426414_a_at	0.4052	Rnf7	ring finger protein 7	19823	ENSMUSG00000051234
biological process	cellular metabolic process	GO:0044237
C=7002;O=198;E=158.04;R=1.25;rawP=1.76e-05;adjP=0.0066
Probe Set ID	R	Gene Symbol	Description	Entrez ID	Ensemble Gene Stable ID
1419536_a_at	0.3952	Rela	v-rel reticuloendotheliosis viral oncogene homolog A (avian)	19697	ENSMUSG00000024927
1450683_at	0.4041	Tagln3	transgelin 3	56370	ENSMUSG00000022658
1438991_x_at	-0.3968	Ppp2r1a	protein phosphatase 2 (formerly 2A), regulatory subunit A (PR 65), alpha isoform	51792	ENSMUSG00000007564
1438383_x_at	-0.4141	Ppp2r1a	protein phosphatase 2 (formerly 2A), regulatory subunit A (PR 65), alpha isoform	51792	ENSMUSG00000007564
1438443_at	-0.4463	Zbtb20	zinc finger and BTB domain containing 20	56490	ENSMUSG00000022708
1451088_a_at	0.4332	Oxa1l	oxidase assembly 1-like	69089	ENSMUSG00000000959
1456170_x_at	-0.3981	Calr	calreticulin	12317	ENSMUSG00000003814
1417606_a_at	-0.4667	Calr	calreticulin	12317	ENSMUSG00000003814
1430634_a_at	0.4225	Pfkp	phosphofructokinase, platelet	56421	ENSMUSG00000021196
1428515_at	0.4139	Zswim7	zinc finger, SWIM-type containing 7	69747	ENSMUSG00000014243
1451746_a_at	0.4145	Atg12	autophagy related 12	67526	ENSMUSG00000032905
1417010_at	-0.385	Zfp238	zinc finger protein 238	30928	ENSMUSG00000063659
1426427_at	0.4891	Ttll1	tubulin tyrosine ligase-like 1	319953	ENSMUSG00000022442
1417999_at	-0.4163	Itm2b	integral membrane protein 2B	16432	ENSMUSG00000022108
1435991_at	-0.4158	Nr3c2	nuclear receptor subfamily 3, group C, member 2	110784	ENSMUSG00000031618
1433520_at	-0.4331	Scap	SREBF chaperone	235623	ENSMUSG00000032485
1460725_at	0.3976	Xpa	xeroderma pigmentosum, complementation group A	22590	ENSMUSG00000028329
1450405_at	0.417	Mrpl19	mitochondrial ribosomal protein L19	56284	ENSMUSG00000030045
1417918_at	0.4001	Mrpl11	mitochondrial ribosomal protein L11	66419	ENSMUSG00000024902
1451943_a_at	0.4764	Ppm1a	protein phosphatase 1A, magnesium dependent, alpha isoform	19042	ENSMUSG00000021096
1416332_at	0.4426	Cirbp	cold inducible RNA binding protein	12696	ENSMUSG00000045193
1439161_at	-0.4957	Ppp6r3	protein phosphatase 6, regulatory subunit 3	52036	ENSMUSG00000024908
1426414_a_at	0.4052	Rnf7	ring finger protein 7	19823	ENSMUSG00000051234
1424685_at	0.403	Exosc4	exosome component 4	109075	ENSMUSG00000034259
1423814_at	0.4275	Ddx41	DEAD (Asp-Glu-Ala-Asp) box polypeptide 41	72935	ENSMUSG00000021494
1433834_at	-0.4043	2015-03-06	membrane-associated ring finger (C3HC4) 6	223455	ENSMUSG00000039100
1427282_a_at	0.3939	Fxn	frataxin	14297	ENSMUSG00000059363
1419420_at	-0.4827	St6galnac5	ST6 (alpha-N-acetyl-neuraminyl-2,3-beta-galactosyl-1,3)-N-acetylgalactosaminide alpha-2,6-sialyltransferase 5	26938	ENSMUSG00000039037
1454758_a_at	0.4256	Tsc22d1	TSC22 domain family, member 1	21807	ENSMUSG00000022010
1450776_at	0.4358	Agpat6	1-acylglycerol-3-phosphate O-acyltransferase 6 (lysophosphatidic acid acyltransferase, zeta)	102247	ENSMUSG00000031545
1432489_a_at	0.4544	Wdyhv1	WDYHV motif containing 1	76773	ENSMUSG00000022359
1433535_x_at	-0.4613	Cct2	chaperonin containing Tcp1, subunit 2 (beta)	12461	ENSMUSG00000034024
1448427_at	0.4803	Ndufa6	NADH dehydrogenase (ubiquinone) 1 alpha subcomplex, 6 (B14)	67130	ENSMUSG00000022450
1448292_at	0.4089	Uqcr11	ubiquinol-cytochrome c reductase, complex III subunit XI	66594	ENSMUSG00000020163
1418016_at	-0.473	Pum2	pumilio 2 (Drosophila)	80913	ENSMUSG00000020594
1423820_at	0.5232	Elof1	elongation factor 1 homolog (ELF1, S. cerevisiae)	66126	ENSMUSG00000013822
1417780_at	0.4193	Lass4	LAG1 homolog, ceramide synthase 4	67260	ENSMUSG00000008206
1421083_x_at	0.409	Banf1	barrier to autointegration factor 1	23825	ENSMUSG00000024844
1421081_a_at	0.4055	Banf1	barrier to autointegration factor 1	23825	ENSMUSG00000024844
1434904_at	-0.401	Hivep2	human immunodeficiency virus type I enhancer binding protein 2	15273	ENSMUSG00000015501
1423158_at	0.3981	Gnpnat1	glucosamine-phosphate N-acetyltransferase 1	54342	ENSMUSG00000037722
1425371_at	-0.4209	Polb	polymerase (DNA directed), beta	18970	ENSMUSG00000031536
1428380_at	0.5038	Atraid	all-trans retinoic acid induced differentiation factor	381629	ENSMUSG00000013622
1451462_a_at	0.3971	Ifnar2	interferon (alpha and beta) receptor 2	15976	ENSMUSG00000022971
1423223_a_at	0.4657	Prdx6	peroxiredoxin 6	11758	ENSMUSG00000026701
1416313_at	-0.4669	Mllt11	myeloid/lymphoid or mixed-lineage leukemia (trithorax homolog, Drosophila); translocated to, 11	56772	ENSMUSG00000053192
1422432_at	0.5004	Dbi	diazepam binding inhibitor	13167	ENSMUSG00000026385
1416023_at	0.4447	Fabp3	fatty acid binding protein 3, muscle and heart	14077	ENSMUSG00000028773
1423128_at	0.4028	Aip	aryl-hydrocarbon receptor-interacting protein	11632	ENSMUSG00000024847
1422482_at	0.4138	Ruvbl2	RuvB-like protein 2	20174	ENSMUSG00000003868
1428336_at	0.3877	Agpat4	1-acylglycerol-3-phosphate O-acyltransferase 4 (lysophosphatidic acid acyltransferase, delta)	68262	ENSMUSG00000023827
1416834_x_at	0.4474	Ndufb2	NADH dehydrogenase (ubiquinone) 1 beta subcomplex, 2	68198	ENSMUSG00000002416
1448483_a_at	0.3949	Ndufb2	NADH dehydrogenase (ubiquinone) 1 beta subcomplex, 2	68198	ENSMUSG00000002416
1416615_at	0.5067	Clpp	ClpP caseinolytic peptidase, ATP-dependent, proteolytic subunit	53895	ENSMUSG00000002660
1439314_at	-0.3973	Clock	circadian locomotor output cycles kaput	12753	ENSMUSG00000029238
1418660_at	-0.3989	Clock	circadian locomotor output cycles kaput	12753	ENSMUSG00000029238
1425507_at	0.4115	Arfrp1	ADP-ribosylation factor related protein 1	76688	ENSMUSG00000038671
1437969_s_at	0.3896	0610007P22Rik	RIKEN cDNA 0610007P22 gene	68327	ENSMUSG00000015126
1456196_x_at	-0.4117	Fkbp1a	FK506 binding protein 1a	14225	ENSMUSG00000032966
1438958_x_at	-0.4292	Fkbp1a	FK506 binding protein 1a	14225	ENSMUSG00000032966
1451058_at	0.4215	Mcts2	malignant T cell amplified sequence 2	66405	ENSMUSG00000042814
1439755_at	-0.5399	Sipa1l1	signal-induced proliferation-associated 1 like 1	217692	ENSMUSG00000042700
1416349_at	0.4602	Mrpl34	mitochondrial ribosomal protein L34	94065	ENSMUSG00000034880
1419249_at	-0.4093	Cdk14	cyclin-dependent kinase 14	18647	ENSMUSG00000028926
1452048_at	0.3927	Mrpl12	mitochondrial ribosomal protein L12	56282	ENSMUSG00000039640
1417103_at	0.4389	Ddt	D-dopachrome tautomerase	13202	ENSMUSG00000001666
1427558_s_at	0.5443	Alg12	asparagine-linked glycosylation 12 (alpha-1,6-mannosyltransferase)	223774	ENSMUSG00000035845
1417947_at	0.4711	Pcna	proliferating cell nuclear antigen	18538	ENSMUSG00000027342
1449046_a_at	0.3986	Josd2	Josephin domain containing 2	66124	ENSMUSG00000038695
1430990_s_at	0.4864	Mrpl44	mitochondrial ribosomal protein L44	69163	ENSMUSG00000026248
1433984_a_at	-0.4061	Mdh2	malate dehydrogenase 2, NAD (mitochondrial)	17448	ENSMUSG00000019179
1455358_at	-0.4622	Rbfox1	RNA binding protein, fox-1 homolog (C. elegans) 1	268859	ENSMUSG00000008658
1418314_a_at	-0.4449	Rbfox1	RNA binding protein, fox-1 homolog (C. elegans) 1	268859	ENSMUSG00000008658
1424646_at	0.4468	Uckl1	uridine-cytidine kinase 1-like 1	68556	ENSMUSG00000089917
1457032_at	-0.4205	Ak5	adenylate kinase 5	229949	ENSMUSG00000039058
1417341_a_at	0.4526	Ppp1r2	protein phosphatase 1, regulatory (inhibitor) subunit 2	66849	ENSMUSG00000047714
1425281_a_at	0.4341	Tsc22d3	TSC22 domain family, member 3	14605	ENSMUSG00000031431
1420772_a_at	0.3908	Tsc22d3	TSC22 domain family, member 3	14605	ENSMUSG00000031431
1455242_at	-0.3853	Foxp1	forkhead box P1	108655	ENSMUSG00000030067
1417067_s_at	-0.3924	Adck3	aarF domain containing kinase 3	67426	ENSMUSG00000026489
1423170_at	0.4031	Taf7	TAF7 RNA polymerase II, TATA box binding protein (TBP)-associated factor	24074	ENSMUSG00000051316
1430326_s_at	0.4346	Uqcrq	ubiquinol-cytochrome c reductase, complex III subunit VII	22272	ENSMUSG00000044894
1418377_a_at	0.4532	Siva1	SIVA1, apoptosis-inducing factor	30954	ENSMUSG00000064326
1451504_at	0.3938	Chchd3	coiled-coil-helix-coiled-coil-helix domain containing 3	66075	ENSMUSG00000053768
1422579_at	0.4522	Hspe1	heat shock protein 1 (chaperonin 10)	15528	ENSMUSG00000073676
1426480_at	0.458	Sbds	Shwachman-Bodian-Diamond syndrome homolog (human)	66711	ENSMUSG00000025337
1433939_at	-0.3995	Aff3	AF4/FMR2 family, member 3	16764	ENSMUSG00000037138
1435566_s_at	0.5501	Araf	v-raf murine sarcoma 3611 viral oncogene homolog	11836	ENSMUSG00000001127
1424364_a_at	0.4175	Uqcr10	ubiquinol-cytochrome c reductase, complex III subunit X	66152	ENSMUSG00000059534
1420473_at	-0.3869	Mtpn	myotrophin	14489	ENSMUSG00000029840
1417206_at	0.4141	Urod	uroporphyrinogen decarboxylase	22275	ENSMUSG00000028684
1449137_at	0.4309	Pdha1	pyruvate dehydrogenase E1 alpha 1	18597	ENSMUSG00000031299
1433818_at	0.4167	Agpat3	1-acylglycerol-3-phosphate O-acyltransferase 3	28169	ENSMUSG00000001211
1421051_s_at	0.5256	Vps25	vacuolar protein sorting 25 (yeast)	28084	ENSMUSG00000078656
1423077_at	0.3929	Snx9	sorting nexin 9	66616	NULL
1423255_at	0.4991	Atp6v1g1	ATPase, H+ transporting, lysosomal V1 subunit G1	66290	ENSMUSG00000039105
1419382_a_at	0.4213	Dhrs4	dehydrogenase/reductase (SDR family) member 4	28200	ENSMUSG00000022210
1416904_at	-0.4231	Mbnl1	muscleblind-like 1 (Drosophila)	56758	ENSMUSG00000027763
1424355_a_at	0.3868	Sin3b	transcriptional regulator, SIN3B (yeast)	20467	ENSMUSG00000031622
1427552_a_at	1	Gstz1	glutathione transferase zeta 1 (maleylacetoacetate isomerase)	14874	ENSMUSG00000021033
1417720_at	0.4897	Polr2j	polymerase (RNA) II (DNA directed) polypeptide J	20022	ENSMUSG00000039771
1417052_at	0.4441	Psmb3	proteasome (prosome, macropain) subunit, beta type 3	26446	ENSMUSG00000069744
1416789_at	0.4437	Idh3g	isocitrate dehydrogenase 3 (NAD+), gamma	15929	ENSMUSG00000002010
1449147_at	-0.3849	Chst1	carbohydrate (keratan sulfate Gal-6) sulfotransferase 1	76969	ENSMUSG00000027221
1416276_a_at	-0.4148	Rps4x	ribosomal protein S4, X-linked	20102	ENSMUSG00000031320
1451312_at	0.5365	Ndufs7	NADH dehydrogenase (ubiquinone) Fe-S protein 7	75406	ENSMUSG00000020153
1448266_at	0.4455	Edf1	endothelial differentiation-related factor 1	59022	ENSMUSG00000015092
1415729_at	-0.4129	Pdpk1	3-phosphoinositide dependent protein kinase 1	18607	ENSMUSG00000024122
1438216_at	-0.4424	Rreb1	ras responsive element binding protein 1	68750	ENSMUSG00000039087
1449116_a_at	0.4376	Dtymk	deoxythymidylate kinase	21915	ENSMUSG00000026281
1425930_a_at	0.3911	Mlx	MAX-like protein X	21428	ENSMUSG00000017801
1449225_a_at	-0.3888	Mapk8ip2	mitogen-activated protein kinase 8 interacting protein 2	60597	ENSMUSG00000022619
1448869_a_at	0.5052	Mrps16	mitochondrial ribosomal protein S16	66242	ENSMUSG00000049960
1448414_at	0.3884	Rad1	RAD1 homolog (S. pombe)	19355	ENSMUSG00000022248
1432367_a_at	0.3856	Ufd1l	ubiquitin fusion degradation 1 like	22230	ENSMUSG00000005262
1421340_at	0.3906	Map3k5	mitogen-activated protein kinase kinase kinase 5	26408	ENSMUSG00000071369
1436342_a_at	0.4494	Ubxn1	UBX domain protein 1	225896	ENSMUSG00000071655
1418986_a_at	0.4208	Uxt	ubiquitously expressed transcript	22294	ENSMUSG00000001134
1422549_at	0.4532	Arl2	ADP-ribosylation factor-like 2	56327	ENSMUSG00000024944
1419647_a_at	0.46	Ier3	immediate early response 3	15937	ENSMUSG00000003541
1435411_at	-0.4542	Neurod2	neurogenic differentiation 2	18013	ENSMUSG00000038255
1451307_at	0.4382	Mrpl14	mitochondrial ribosomal protein L14	68463	ENSMUSG00000023939
1416837_at	0.4039	Bax	BCL2-associated X protein	12028	ENSMUSG00000003873
1418888_a_at	0.4223	Sepx1	selenoprotein X 1	27361	ENSMUSG00000075705
1460703_at	0.4179	Ascc1	activating signal cointegrator 1 complex subunit 1	69090	ENSMUSG00000044475
1426380_at	-0.4235	Eif4b	eukaryotic translation initiation factor 4B	75705	ENSMUSG00000058655
1431962_a_at	0.4724	Stambp	STAM binding protein	70527	ENSMUSG00000006906
1416317_a_at	0.4315	Stambp	STAM binding protein	70527	ENSMUSG00000006906
1417501_at	0.4271	Fbxo6	F-box protein 6	50762	ENSMUSG00000055401
1417427_at	0.3861	Rnaseh2c	ribonuclease H2, subunit C	68209	ENSMUSG00000024925
1450711_at	-0.4661	Brd4	bromodomain containing 4	57261	ENSMUSG00000024002
1430075_at	-0.3945	Sf3b3	splicing factor 3b, subunit 3	101943	ENSMUSG00000033732
1417515_at	0.3963	Lsm10	U7 snRNP-specific Sm-like protein LSM10	116748	ENSMUSG00000050188
1442514_a_at	-0.3877	Ell3	elongation factor RNA polymerase II-like 3	269344	ENSMUSG00000027246
1422919_at	0.3889	Hrasls	HRAS-like suppressor	27281	ENSMUSG00000022525
1436415_at	0.4015	Med29	mediator complex subunit 29	67224	ENSMUSG00000003444
1437972_s_at	0.3853	Sf3b5	splicing factor 3b, subunit 5	66125	ENSMUSG00000078348
1451185_at	0.4157	Sf3b5	splicing factor 3b, subunit 5	66125	ENSMUSG00000078348
1458285_at	-0.4474	Gria1	glutamate receptor, ionotropic, AMPA1 (alpha 1)	14799	ENSMUSG00000020524
1416245_at	0.4012	Aurkaip1	aurora kinase A interacting protein 1	66077	ENSMUSG00000065990
1454641_at	-0.413	Cggbp1	CGG triplet repeat binding protein 1	106143	ENSMUSG00000054604
1417605_s_at	0.4011	Camk1	calcium/calmodulin-dependent protein kinase I	52163	ENSMUSG00000030272
1417604_at	0.3946	Camk1	calcium/calmodulin-dependent protein kinase I	52163	ENSMUSG00000030272
1460360_at	0.3927	Asrgl1	asparaginase like 1	66514	ENSMUSG00000024654
1419456_at	0.39	Dcxr	dicarbonyl L-xylulose reductase	67880	ENSMUSG00000039450
1457600_x_at	-0.3932	Nkd2	naked cuticle 2 homolog (Drosophila)	72293	ENSMUSG00000021567
1416212_at	0.4508	Magoh	mago-nashi homolog, proliferation-associated (Drosophila)	17149	ENSMUSG00000028609
1416593_at	0.4554	Glrx	glutaredoxin	93692	ENSMUSG00000021591
1416583_at	0.4059	Bad	BCL2-associated agonist of cell death	12015	ENSMUSG00000024959
1421970_a_at	-0.4056	Gria2	glutamate receptor, ionotropic, AMPA2 (alpha 2)	14800	ENSMUSG00000033981
1451650_at	0.4141	Ddo	D-aspartate oxidase	70503	ENSMUSG00000063428
1429613_at	0.389	Dusp28	dual specificity phosphatase 28	67446	ENSMUSG00000047067
1416335_at	0.4628	Mif	macrophage migration inhibitory factor	17319	ENSMUSG00000033307
1417421_at	0.4717	S100a1	S100 calcium binding protein A1	20193	ENSMUSG00000044080
1424108_at	-0.3878	Glo1	glyoxalase 1	109801	ENSMUSG00000024026
1451240_a_at	-0.4037	Glo1	glyoxalase 1	109801	ENSMUSG00000024026
1436121_a_at	0.3935	Nsmce1	non-SMC element 1 homolog (S. cerevisiae)	67711	ENSMUSG00000030750
1429958_x_at	0.4148	Haghl	hydroxyacylglutathione hydrolase-like	68977	ENSMUSG00000061046
1423544_at	0.3861	Ptpn5	protein tyrosine phosphatase, non-receptor type 5	19259	ENSMUSG00000030854
1423553_at	0.4566	Dnajb3	DnaJ (Hsp40) homolog, subfamily B, member 3	15504	ENSMUSG00000081984
1437473_at	-0.525	Maf	avian musculoaponeurotic fibrosarcoma (v-maf) AS42 oncogene homolog	17132	ENSMUSG00000055435
1422976_x_at	0.4927	Ndufa7	NADH dehydrogenase (ubiquinone) 1 alpha subcomplex, 7 (B14.5a)	66416	ENSMUSG00000041881
1455749_x_at	0.4688	Ndufa7	NADH dehydrogenase (ubiquinone) 1 alpha subcomplex, 7 (B14.5a)	66416	ENSMUSG00000041881
1428360_x_at	0.527	Ndufa7	NADH dehydrogenase (ubiquinone) 1 alpha subcomplex, 7 (B14.5a)	66416	ENSMUSG00000041881
1450818_a_at	0.4138	Ndufa7	NADH dehydrogenase (ubiquinone) 1 alpha subcomplex, 7 (B14.5a)	66416	ENSMUSG00000041881
1436567_a_at	0.5276	Ndufa7	NADH dehydrogenase (ubiquinone) 1 alpha subcomplex, 7 (B14.5a)	66416	ENSMUSG00000041881
1416849_at	0.4703	Cisd1	CDGSH iron sulfur domain 1	52637	ENSMUSG00000037710
1415744_at	0.4057	H2-Ke2	H2-K region expressed gene 2	14976	ENSMUSG00000024309
1419428_a_at	0.4187	Gaa	glucosidase, alpha, acid	14387	ENSMUSG00000025579
1418764_a_at	0.3854	Bpnt1	bisphosphate 3'-nucleotidase 1	23827	ENSMUSG00000026617
1455061_a_at	0.4767	Acaa2	acetyl-Coenzyme A acyltransferase 2 (mitochondrial 3-oxoacyl-Coenzyme A thiolase)	52538	ENSMUSG00000036880
1416766_at	0.3961	Mosc2	MOCO sulphurase C-terminal domain containing 2	67247	ENSMUSG00000073481
1442549_at	-0.4167	Mbnl3	muscleblind-like 3 (Drosophila)	171170	ENSMUSG00000036109
1434004_at	0.4015	Dhps	deoxyhypusine synthase	330817	ENSMUSG00000060038
1429776_a_at	0.4103	Dnajb6	DnaJ (Hsp40) homolog, subfamily B, member 6	23950	ENSMUSG00000029131
1416093_a_at	0.5553	Mrpl20	mitochondrial ribosomal protein L20	66448	ENSMUSG00000029066
1439777_at	-0.4144	Celf2	CUGBP, Elav-like family member 2	14007	ENSMUSG00000002107
1426958_at	0.4026	Rps9	ribosomal protein S9	76846	ENSMUSG00000006333
1433689_s_at	0.5417	Rps9	ribosomal protein S9	76846	ENSMUSG00000006333
1450048_a_at	0.4154	Idh2	isocitrate dehydrogenase 2 (NADP+), mitochondrial	269951	ENSMUSG00000030541
1455713_x_at	-0.4264	Phb2	prohibitin 2	12034	ENSMUSG00000004264
1445440_at	-0.4	Ccdc88a	coiled coil domain containing 88A	108686	ENSMUSG00000032740
1416553_at	0.5558	Stra13	stimulated by retinoic acid 13	20892	ENSMUSG00000025144
1427578_a_at	0.4229	Eif6	eukaryotic translation initiation factor 6	16418	ENSMUSG00000027613
1448669_at	-0.4292	Dkk3	dickkopf homolog 3 (Xenopus laevis)	50781	ENSMUSG00000030772
1449343_s_at	0.388	Sin3a	transcriptional regulator, SIN3A (yeast)	20466	ENSMUSG00000042557
1423299_at	0.4198	Txnl1	thioredoxin-like 1	53382	ENSMUSG00000024583
1425599_a_at	0.4583	Gatad1	GATA zinc finger domain containing 1	67210	ENSMUSG00000007415
1434159_at	-0.4204	Stk4	serine/threonine kinase 4	58231	ENSMUSG00000018209
1428254_at	-0.4264	Purb	purine rich element binding protein B	19291	ENSMUSG00000094483
1456888_at	0.3963	Pfkfb4	6-phosphofructo-2-kinase/fructose-2,6-biphosphatase 4	270198	ENSMUSG00000025648
1451408_at	0.4444	Trub2	TruB pseudouridine (psi) synthase homolog 2 (E. coli)	227682	ENSMUSG00000039826
1416220_at	0.4053	Spcs1	signal peptidase complex subunit 1 homolog (S. cerevisiae)	69019	ENSMUSG00000021917
1460181_at	0.3966	Stmn3	stathmin-like 3	20262	ENSMUSG00000027581
1416764_at	0.4158	Fis1	fission 1 (mitochondrial outer membrane) homolog (yeast)	66437	ENSMUSG00000019054
1448971_at	0.441	2410022L05Rik	RIKEN cDNA 2410022L05 gene	66423	ENSMUSG00000031458
1448119_at	0.4632	Bpgm	2,3-bisphosphoglycerate mutase	12183	ENSMUSG00000038871
1415864_at	0.434	Bpgm	2,3-bisphosphoglycerate mutase	12183	ENSMUSG00000038871
1448387_at	0.3943	Rbx1	ring-box 1	56438	ENSMUSG00000022400
1443843_x_at	-0.4012	Rpl9	ribosomal protein L9	20005	ENSMUSG00000047215
1437064_at	-0.4398	Ar	androgen receptor	11835	ENSMUSG00000046532
1448420_a_at	0.409	Fbxl12	F-box and leucine-rich repeat protein 12	30843	ENSMUSG00000066892
1432462_a_at	0.474	Med27	mediator complex subunit 27	68975	ENSMUSG00000026799
1451164_a_at	0.5042	Mrps18b	mitochondrial ribosomal protein S18B	66973	ENSMUSG00000024436
1448718_at	0.4361	Lamtor1	late endosomal/lysosomal adaptor, MAPK and MTOR activator 1	66508	ENSMUSG00000030842
1448905_at	0.4337	Nme3	NME/NM23 nucleoside diphosphate kinase 3	79059	ENSMUSG00000073435
1421530_a_at	0.3899	Grm8	glutamate receptor, metabotropic 8	14823	ENSMUSG00000024211
1452341_at	0.433	Echs1	enoyl Coenzyme A hydratase, short chain, 1, mitochondrial	93747	ENSMUSG00000025465
1452026_a_at	0.4353	Pla2g12a	phospholipase A2, group XIIA	66350	ENSMUSG00000027999
1421872_at	0.4076	Rab24	RAB24, member RAS oncogene family	19336	ENSMUSG00000034789
1421873_s_at	0.4295	Rab24	RAB24, member RAS oncogene family	19336	ENSMUSG00000034789
1429079_a_at	0.442	Mef2b	myocyte enhancer factor 2B	17259	ENSMUSG00000002345,ENSMUSG00000079033
1426373_at	-0.4173	Ski	ski sarcoma viral oncogene homolog (avian)	20481	ENSMUSG00000029050
1452173_at	0.4082	Hadha	hydroxyacyl-Coenzyme A dehydrogenase/3-ketoacyl-Coenzyme A thiolase/enoyl-Coenzyme A hydratase (trifunctional protein), alpha subunit	97212	ENSMUSG00000025745
1436180_at	-0.4146	Dnajc5	DnaJ (Hsp40) homolog, subfamily C, member 5	13002	ENSMUSG00000000826
1423372_at	0.4309	Pole4	polymerase (DNA-directed), epsilon 4 (p12 subunit)	66979	ENSMUSG00000030042
1423409_a_at	0.3984	Chtop	chromatin target of PRMT1	66511	ENSMUSG00000001017
biological process	metabolic process	GO:0008152
C=8204;O=226;E=185.17;R=1.22;rawP=1.26e-05;adjP=0.0066
Probe Set ID	R	Gene Symbol	Description	Entrez ID	Ensemble Gene Stable ID
1419536_a_at	0.3952	Rela	v-rel reticuloendotheliosis viral oncogene homolog A (avian)	19697	ENSMUSG00000024927
1450683_at	0.4041	Tagln3	transgelin 3	56370	ENSMUSG00000022658
1438991_x_at	-0.3968	Ppp2r1a	protein phosphatase 2 (formerly 2A), regulatory subunit A (PR 65), alpha isoform	51792	ENSMUSG00000007564
1438383_x_at	-0.4141	Ppp2r1a	protein phosphatase 2 (formerly 2A), regulatory subunit A (PR 65), alpha isoform	51792	ENSMUSG00000007564
1448100_at	-0.4817	4833439L19Rik	RIKEN cDNA 4833439L19 gene	97820	ENSMUSG00000025871
1438443_at	-0.4463	Zbtb20	zinc finger and BTB domain containing 20	56490	ENSMUSG00000022708
1451088_a_at	0.4332	Oxa1l	oxidase assembly 1-like	69089	ENSMUSG00000000959
1456170_x_at	-0.3981	Calr	calreticulin	12317	ENSMUSG00000003814
1417606_a_at	-0.4667	Calr	calreticulin	12317	ENSMUSG00000003814
1430634_a_at	0.4225	Pfkp	phosphofructokinase, platelet	56421	ENSMUSG00000021196
1428515_at	0.4139	Zswim7	zinc finger, SWIM-type containing 7	69747	ENSMUSG00000014243
1451746_a_at	0.4145	Atg12	autophagy related 12	67526	ENSMUSG00000032905
1417010_at	-0.385	Zfp238	zinc finger protein 238	30928	ENSMUSG00000063659
1426427_at	0.4891	Ttll1	tubulin tyrosine ligase-like 1	319953	ENSMUSG00000022442
1417999_at	-0.4163	Itm2b	integral membrane protein 2B	16432	ENSMUSG00000022108
1435991_at	-0.4158	Nr3c2	nuclear receptor subfamily 3, group C, member 2	110784	ENSMUSG00000031618
1433520_at	-0.4331	Scap	SREBF chaperone	235623	ENSMUSG00000032485
1460725_at	0.3976	Xpa	xeroderma pigmentosum, complementation group A	22590	ENSMUSG00000028329
1434370_s_at	0.3945	Faf1	Fas-associated factor 1	14084	ENSMUSG00000010517
1423765_at	0.3952	Athl1	ATH1, acid trehalase-like 1 (yeast)	212974	ENSMUSG00000062031
1417287_at	0.4165	H13	histocompatibility 13	14950	ENSMUSG00000019188
1450405_at	0.417	Mrpl19	mitochondrial ribosomal protein L19	56284	ENSMUSG00000030045
1417918_at	0.4001	Mrpl11	mitochondrial ribosomal protein L11	66419	ENSMUSG00000024902
1448286_at	0.4051	Hsd17b10	hydroxysteroid (17-beta) dehydrogenase 10	15108	ENSMUSG00000025260
1451943_a_at	0.4764	Ppm1a	protein phosphatase 1A, magnesium dependent, alpha isoform	19042	ENSMUSG00000021096
1416332_at	0.4426	Cirbp	cold inducible RNA binding protein	12696	ENSMUSG00000045193
1439161_at	-0.4957	Ppp6r3	protein phosphatase 6, regulatory subunit 3	52036	ENSMUSG00000024908
1426836_s_at	-0.3917	Metap1	methionyl aminopeptidase 1	75624	ENSMUSG00000005813
1426414_a_at	0.4052	Rnf7	ring finger protein 7	19823	ENSMUSG00000051234
1424685_at	0.403	Exosc4	exosome component 4	109075	ENSMUSG00000034259
1423814_at	0.4275	Ddx41	DEAD (Asp-Glu-Ala-Asp) box polypeptide 41	72935	ENSMUSG00000021494
1449316_at	0.3892	Cyp4f15	cytochrome P450, family 4, subfamily f, polypeptide 15	106648	ENSMUSG00000073424
1433834_at	-0.4043	2015-03-06	membrane-associated ring finger (C3HC4) 6	223455	ENSMUSG00000039100
1427282_a_at	0.3939	Fxn	frataxin	14297	ENSMUSG00000059363
1419420_at	-0.4827	St6galnac5	ST6 (alpha-N-acetyl-neuraminyl-2,3-beta-galactosyl-1,3)-N-acetylgalactosaminide alpha-2,6-sialyltransferase 5	26938	ENSMUSG00000039037
1416831_at	0.4436	Neu1	neuraminidase 1	18010	ENSMUSG00000007038
1429110_a_at	0.3935	Nsun4	NOL1/NOP2/Sun domain family, member 4	72181	ENSMUSG00000028706
1454758_a_at	0.4256	Tsc22d1	TSC22 domain family, member 1	21807	ENSMUSG00000022010
1450776_at	0.4358	Agpat6	1-acylglycerol-3-phosphate O-acyltransferase 6 (lysophosphatidic acid acyltransferase, zeta)	102247	ENSMUSG00000031545
1432489_a_at	0.4544	Wdyhv1	WDYHV motif containing 1	76773	ENSMUSG00000022359
1433535_x_at	-0.4613	Cct2	chaperonin containing Tcp1, subunit 2 (beta)	12461	ENSMUSG00000034024
1448427_at	0.4803	Ndufa6	NADH dehydrogenase (ubiquinone) 1 alpha subcomplex, 6 (B14)	67130	ENSMUSG00000022450
1448292_at	0.4089	Uqcr11	ubiquinol-cytochrome c reductase, complex III subunit XI	66594	ENSMUSG00000020163
1418016_at	-0.473	Pum2	pumilio 2 (Drosophila)	80913	ENSMUSG00000020594
1423820_at	0.5232	Elof1	elongation factor 1 homolog (ELF1, S. cerevisiae)	66126	ENSMUSG00000013822
1417780_at	0.4193	Lass4	LAG1 homolog, ceramide synthase 4	67260	ENSMUSG00000008206
1421083_x_at	0.409	Banf1	barrier to autointegration factor 1	23825	ENSMUSG00000024844
1421081_a_at	0.4055	Banf1	barrier to autointegration factor 1	23825	ENSMUSG00000024844
1434904_at	-0.401	Hivep2	human immunodeficiency virus type I enhancer binding protein 2	15273	ENSMUSG00000015501
1423158_at	0.3981	Gnpnat1	glucosamine-phosphate N-acetyltransferase 1	54342	ENSMUSG00000037722
1425371_at	-0.4209	Polb	polymerase (DNA directed), beta	18970	ENSMUSG00000031536
1428380_at	0.5038	Atraid	all-trans retinoic acid induced differentiation factor	381629	ENSMUSG00000013622
1446791_at	0.3997	Pi15	peptidase inhibitor 15	94227	ENSMUSG00000067780
1451462_a_at	0.3971	Ifnar2	interferon (alpha and beta) receptor 2	15976	ENSMUSG00000022971
1423223_a_at	0.4657	Prdx6	peroxiredoxin 6	11758	ENSMUSG00000026701
1416313_at	-0.4669	Mllt11	myeloid/lymphoid or mixed-lineage leukemia (trithorax homolog, Drosophila); translocated to, 11	56772	ENSMUSG00000053192
1417868_a_at	0.5132	Ctsz	cathepsin Z	64138	ENSMUSG00000016256
1417870_x_at	0.4574	Ctsz	cathepsin Z	64138	ENSMUSG00000016256
1422432_at	0.5004	Dbi	diazepam binding inhibitor	13167	ENSMUSG00000026385
1416023_at	0.4447	Fabp3	fatty acid binding protein 3, muscle and heart	14077	ENSMUSG00000028773
1423128_at	0.4028	Aip	aryl-hydrocarbon receptor-interacting protein	11632	ENSMUSG00000024847
1422482_at	0.4138	Ruvbl2	RuvB-like protein 2	20174	ENSMUSG00000003868
1428336_at	0.3877	Agpat4	1-acylglycerol-3-phosphate O-acyltransferase 4 (lysophosphatidic acid acyltransferase, delta)	68262	ENSMUSG00000023827
1432384_a_at	0.4277	Mettl6	methyltransferase like 6	67011	ENSMUSG00000021891
1434855_at	0.4726	Amdhd2	amidohydrolase domain containing 2	245847	ENSMUSG00000036820
1416834_x_at	0.4474	Ndufb2	NADH dehydrogenase (ubiquinone) 1 beta subcomplex, 2	68198	ENSMUSG00000002416
1448483_a_at	0.3949	Ndufb2	NADH dehydrogenase (ubiquinone) 1 beta subcomplex, 2	68198	ENSMUSG00000002416
1416615_at	0.5067	Clpp	ClpP caseinolytic peptidase, ATP-dependent, proteolytic subunit	53895	ENSMUSG00000002660
1439314_at	-0.3973	Clock	circadian locomotor output cycles kaput	12753	ENSMUSG00000029238
1418660_at	-0.3989	Clock	circadian locomotor output cycles kaput	12753	ENSMUSG00000029238
1425507_at	0.4115	Arfrp1	ADP-ribosylation factor related protein 1	76688	ENSMUSG00000038671
1437969_s_at	0.3896	0610007P22Rik	RIKEN cDNA 0610007P22 gene	68327	ENSMUSG00000015126
1456196_x_at	-0.4117	Fkbp1a	FK506 binding protein 1a	14225	ENSMUSG00000032966
1438958_x_at	-0.4292	Fkbp1a	FK506 binding protein 1a	14225	ENSMUSG00000032966
1422507_at	0.4578	Cstb	cystatin B	13014	ENSMUSG00000005054
1451058_at	0.4215	Mcts2	malignant T cell amplified sequence 2	66405	ENSMUSG00000042814
1439755_at	-0.5399	Sipa1l1	signal-induced proliferation-associated 1 like 1	217692	ENSMUSG00000042700
1416349_at	0.4602	Mrpl34	mitochondrial ribosomal protein L34	94065	ENSMUSG00000034880
1450054_at	-0.4064	Add1	adducin 1 (alpha)	11518	ENSMUSG00000029106
1419249_at	-0.4093	Cdk14	cyclin-dependent kinase 14	18647	ENSMUSG00000028926
1452048_at	0.3927	Mrpl12	mitochondrial ribosomal protein L12	56282	ENSMUSG00000039640
1417103_at	0.4389	Ddt	D-dopachrome tautomerase	13202	ENSMUSG00000001666
1427558_s_at	0.5443	Alg12	asparagine-linked glycosylation 12 (alpha-1,6-mannosyltransferase)	223774	ENSMUSG00000035845
1417947_at	0.4711	Pcna	proliferating cell nuclear antigen	18538	ENSMUSG00000027342
1449046_a_at	0.3986	Josd2	Josephin domain containing 2	66124	ENSMUSG00000038695
1430990_s_at	0.4864	Mrpl44	mitochondrial ribosomal protein L44	69163	ENSMUSG00000026248
1433984_a_at	-0.4061	Mdh2	malate dehydrogenase 2, NAD (mitochondrial)	17448	ENSMUSG00000019179
1455358_at	-0.4622	Rbfox1	RNA binding protein, fox-1 homolog (C. elegans) 1	268859	ENSMUSG00000008658
1418314_a_at	-0.4449	Rbfox1	RNA binding protein, fox-1 homolog (C. elegans) 1	268859	ENSMUSG00000008658
1424646_at	0.4468	Uckl1	uridine-cytidine kinase 1-like 1	68556	ENSMUSG00000089917
1457032_at	-0.4205	Ak5	adenylate kinase 5	229949	ENSMUSG00000039058
1417341_a_at	0.4526	Ppp1r2	protein phosphatase 1, regulatory (inhibitor) subunit 2	66849	ENSMUSG00000047714
1425281_a_at	0.4341	Tsc22d3	TSC22 domain family, member 3	14605	ENSMUSG00000031431
1420772_a_at	0.3908	Tsc22d3	TSC22 domain family, member 3	14605	ENSMUSG00000031431
1455242_at	-0.3853	Foxp1	forkhead box P1	108655	ENSMUSG00000030067
1417056_at	0.4695	Psme1	proteasome (prosome, macropain) 28 subunit, alpha	19186	ENSMUSG00000022216
1417067_s_at	-0.3924	Adck3	aarF domain containing kinase 3	67426	ENSMUSG00000026489
1423170_at	0.4031	Taf7	TAF7 RNA polymerase II, TATA box binding protein (TBP)-associated factor	24074	ENSMUSG00000051316
1430326_s_at	0.4346	Uqcrq	ubiquinol-cytochrome c reductase, complex III subunit VII	22272	ENSMUSG00000044894
1418377_a_at	0.4532	Siva1	SIVA1, apoptosis-inducing factor	30954	ENSMUSG00000064326
1451504_at	0.3938	Chchd3	coiled-coil-helix-coiled-coil-helix domain containing 3	66075	ENSMUSG00000053768
1422579_at	0.4522	Hspe1	heat shock protein 1 (chaperonin 10)	15528	ENSMUSG00000073676
1426480_at	0.458	Sbds	Shwachman-Bodian-Diamond syndrome homolog (human)	66711	ENSMUSG00000025337
1433939_at	-0.3995	Aff3	AF4/FMR2 family, member 3	16764	ENSMUSG00000037138
1435566_s_at	0.5501	Araf	v-raf murine sarcoma 3611 viral oncogene homolog	11836	ENSMUSG00000001127
1424364_a_at	0.4175	Uqcr10	ubiquinol-cytochrome c reductase, complex III subunit X	66152	ENSMUSG00000059534
1420473_at	-0.3869	Mtpn	myotrophin	14489	ENSMUSG00000029840
1417206_at	0.4141	Urod	uroporphyrinogen decarboxylase	22275	ENSMUSG00000028684
1449137_at	0.4309	Pdha1	pyruvate dehydrogenase E1 alpha 1	18597	ENSMUSG00000031299
1433818_at	0.4167	Agpat3	1-acylglycerol-3-phosphate O-acyltransferase 3	28169	ENSMUSG00000001211
1421051_s_at	0.5256	Vps25	vacuolar protein sorting 25 (yeast)	28084	ENSMUSG00000078656
1423077_at	0.3929	Snx9	sorting nexin 9	66616	NULL
1423255_at	0.4991	Atp6v1g1	ATPase, H+ transporting, lysosomal V1 subunit G1	66290	ENSMUSG00000039105
1419382_a_at	0.4213	Dhrs4	dehydrogenase/reductase (SDR family) member 4	28200	ENSMUSG00000022210
1416904_at	-0.4231	Mbnl1	muscleblind-like 1 (Drosophila)	56758	ENSMUSG00000027763
1424355_a_at	0.3868	Sin3b	transcriptional regulator, SIN3B (yeast)	20467	ENSMUSG00000031622
1427552_a_at	1	Gstz1	glutathione transferase zeta 1 (maleylacetoacetate isomerase)	14874	ENSMUSG00000021033
1417720_at	0.4897	Polr2j	polymerase (RNA) II (DNA directed) polypeptide J	20022	ENSMUSG00000039771
1417052_at	0.4441	Psmb3	proteasome (prosome, macropain) subunit, beta type 3	26446	ENSMUSG00000069744
1416789_at	0.4437	Idh3g	isocitrate dehydrogenase 3 (NAD+), gamma	15929	ENSMUSG00000002010
1449147_at	-0.3849	Chst1	carbohydrate (keratan sulfate Gal-6) sulfotransferase 1	76969	ENSMUSG00000027221
1416276_a_at	-0.4148	Rps4x	ribosomal protein S4, X-linked	20102	ENSMUSG00000031320
1451312_at	0.5365	Ndufs7	NADH dehydrogenase (ubiquinone) Fe-S protein 7	75406	ENSMUSG00000020153
1448266_at	0.4455	Edf1	endothelial differentiation-related factor 1	59022	ENSMUSG00000015092
1452626_a_at	0.519	Fuom	fucose mutarotase	69064	ENSMUSG00000025466
1415729_at	-0.4129	Pdpk1	3-phosphoinositide dependent protein kinase 1	18607	ENSMUSG00000024122
1436702_at	0.3879	Nat8l	N-acetyltransferase 8-like	269642	ENSMUSG00000048142
1438216_at	-0.4424	Rreb1	ras responsive element binding protein 1	68750	ENSMUSG00000039087
1449116_a_at	0.4376	Dtymk	deoxythymidylate kinase	21915	ENSMUSG00000026281
1425930_a_at	0.3911	Mlx	MAX-like protein X	21428	ENSMUSG00000017801
1449225_a_at	-0.3888	Mapk8ip2	mitogen-activated protein kinase 8 interacting protein 2	60597	ENSMUSG00000022619
1448869_a_at	0.5052	Mrps16	mitochondrial ribosomal protein S16	66242	ENSMUSG00000049960
1448414_at	0.3884	Rad1	RAD1 homolog (S. pombe)	19355	ENSMUSG00000022248
1432367_a_at	0.3856	Ufd1l	ubiquitin fusion degradation 1 like	22230	ENSMUSG00000005262
1450969_at	0.3941	Pccb	propionyl Coenzyme A carboxylase, beta polypeptide	66904	ENSMUSG00000032527
1421340_at	0.3906	Map3k5	mitogen-activated protein kinase kinase kinase 5	26408	ENSMUSG00000071369
1436342_a_at	0.4494	Ubxn1	UBX domain protein 1	225896	ENSMUSG00000071655
1418986_a_at	0.4208	Uxt	ubiquitously expressed transcript	22294	ENSMUSG00000001134
1422549_at	0.4532	Arl2	ADP-ribosylation factor-like 2	56327	ENSMUSG00000024944
1419647_a_at	0.46	Ier3	immediate early response 3	15937	ENSMUSG00000003541
1435411_at	-0.4542	Neurod2	neurogenic differentiation 2	18013	ENSMUSG00000038255
1451307_at	0.4382	Mrpl14	mitochondrial ribosomal protein L14	68463	ENSMUSG00000023939
1416837_at	0.4039	Bax	BCL2-associated X protein	12028	ENSMUSG00000003873
1418888_a_at	0.4223	Sepx1	selenoprotein X 1	27361	ENSMUSG00000075705
1460703_at	0.4179	Ascc1	activating signal cointegrator 1 complex subunit 1	69090	ENSMUSG00000044475
1422072_a_at	0.4444	Gstm6	glutathione S-transferase, mu 6	14867	ENSMUSG00000068762
1426380_at	-0.4235	Eif4b	eukaryotic translation initiation factor 4B	75705	ENSMUSG00000058655
1431962_a_at	0.4724	Stambp	STAM binding protein	70527	ENSMUSG00000006906
1416317_a_at	0.4315	Stambp	STAM binding protein	70527	ENSMUSG00000006906
1417501_at	0.4271	Fbxo6	F-box protein 6	50762	ENSMUSG00000055401
1455266_at	-0.4283	Kif5c	kinesin family member 5C	16574	ENSMUSG00000026764
1417427_at	0.3861	Rnaseh2c	ribonuclease H2, subunit C	68209	ENSMUSG00000024925
1450711_at	-0.4661	Brd4	bromodomain containing 4	57261	ENSMUSG00000024002
1430075_at	-0.3945	Sf3b3	splicing factor 3b, subunit 3	101943	ENSMUSG00000033732
1417515_at	0.3963	Lsm10	U7 snRNP-specific Sm-like protein LSM10	116748	ENSMUSG00000050188
1442514_a_at	-0.3877	Ell3	elongation factor RNA polymerase II-like 3	269344	ENSMUSG00000027246
1422919_at	0.3889	Hrasls	HRAS-like suppressor	27281	ENSMUSG00000022525
1436415_at	0.4015	Med29	mediator complex subunit 29	67224	ENSMUSG00000003444
1437972_s_at	0.3853	Sf3b5	splicing factor 3b, subunit 5	66125	ENSMUSG00000078348
1451185_at	0.4157	Sf3b5	splicing factor 3b, subunit 5	66125	ENSMUSG00000078348
1458285_at	-0.4474	Gria1	glutamate receptor, ionotropic, AMPA1 (alpha 1)	14799	ENSMUSG00000020524
1416245_at	0.4012	Aurkaip1	aurora kinase A interacting protein 1	66077	ENSMUSG00000065990
1454641_at	-0.413	Cggbp1	CGG triplet repeat binding protein 1	106143	ENSMUSG00000054604
1447909_s_at	0.4421	Selk	selenoprotein K	80795	ENSMUSG00000042682
1423225_at	0.4004	Selk	selenoprotein K	80795	ENSMUSG00000042682
1417605_s_at	0.4011	Camk1	calcium/calmodulin-dependent protein kinase I	52163	ENSMUSG00000030272
1417604_at	0.3946	Camk1	calcium/calmodulin-dependent protein kinase I	52163	ENSMUSG00000030272
1460360_at	0.3927	Asrgl1	asparaginase like 1	66514	ENSMUSG00000024654
1419456_at	0.39	Dcxr	dicarbonyl L-xylulose reductase	67880	ENSMUSG00000039450
1457600_x_at	-0.3932	Nkd2	naked cuticle 2 homolog (Drosophila)	72293	ENSMUSG00000021567
1416212_at	0.4508	Magoh	mago-nashi homolog, proliferation-associated (Drosophila)	17149	ENSMUSG00000028609
1416593_at	0.4554	Glrx	glutaredoxin	93692	ENSMUSG00000021591
1416583_at	0.4059	Bad	BCL2-associated agonist of cell death	12015	ENSMUSG00000024959
1421970_a_at	-0.4056	Gria2	glutamate receptor, ionotropic, AMPA2 (alpha 2)	14800	ENSMUSG00000033981
1451650_at	0.4141	Ddo	D-aspartate oxidase	70503	ENSMUSG00000063428
1429613_at	0.389	Dusp28	dual specificity phosphatase 28	67446	ENSMUSG00000047067
1416335_at	0.4628	Mif	macrophage migration inhibitory factor	17319	ENSMUSG00000033307
1417421_at	0.4717	S100a1	S100 calcium binding protein A1	20193	ENSMUSG00000044080
1449558_at	-0.409	F8	coagulation factor VIII	14069	ENSMUSG00000031196
1424108_at	-0.3878	Glo1	glyoxalase 1	109801	ENSMUSG00000024026
1451240_a_at	-0.4037	Glo1	glyoxalase 1	109801	ENSMUSG00000024026
1436121_a_at	0.3935	Nsmce1	non-SMC element 1 homolog (S. cerevisiae)	67711	ENSMUSG00000030750
1429958_x_at	0.4148	Haghl	hydroxyacylglutathione hydrolase-like	68977	ENSMUSG00000061046
1423544_at	0.3861	Ptpn5	protein tyrosine phosphatase, non-receptor type 5	19259	ENSMUSG00000030854
1423553_at	0.4566	Dnajb3	DnaJ (Hsp40) homolog, subfamily B, member 3	15504	ENSMUSG00000081984
1449123_at	0.4079	Itih3	inter-alpha trypsin inhibitor, heavy chain 3	16426	ENSMUSG00000006522
1437473_at	-0.525	Maf	avian musculoaponeurotic fibrosarcoma (v-maf) AS42 oncogene homolog	17132	ENSMUSG00000055435
1422976_x_at	0.4927	Ndufa7	NADH dehydrogenase (ubiquinone) 1 alpha subcomplex, 7 (B14.5a)	66416	ENSMUSG00000041881
1455749_x_at	0.4688	Ndufa7	NADH dehydrogenase (ubiquinone) 1 alpha subcomplex, 7 (B14.5a)	66416	ENSMUSG00000041881
1428360_x_at	0.527	Ndufa7	NADH dehydrogenase (ubiquinone) 1 alpha subcomplex, 7 (B14.5a)	66416	ENSMUSG00000041881
1450818_a_at	0.4138	Ndufa7	NADH dehydrogenase (ubiquinone) 1 alpha subcomplex, 7 (B14.5a)	66416	ENSMUSG00000041881
1436567_a_at	0.5276	Ndufa7	NADH dehydrogenase (ubiquinone) 1 alpha subcomplex, 7 (B14.5a)	66416	ENSMUSG00000041881
1416849_at	0.4703	Cisd1	CDGSH iron sulfur domain 1	52637	ENSMUSG00000037710
1415744_at	0.4057	H2-Ke2	H2-K region expressed gene 2	14976	ENSMUSG00000024309
1419428_a_at	0.4187	Gaa	glucosidase, alpha, acid	14387	ENSMUSG00000025579
1418764_a_at	0.3854	Bpnt1	bisphosphate 3'-nucleotidase 1	23827	ENSMUSG00000026617
1455061_a_at	0.4767	Acaa2	acetyl-Coenzyme A acyltransferase 2 (mitochondrial 3-oxoacyl-Coenzyme A thiolase)	52538	ENSMUSG00000036880
1416766_at	0.3961	Mosc2	MOCO sulphurase C-terminal domain containing 2	67247	ENSMUSG00000073481
1442549_at	-0.4167	Mbnl3	muscleblind-like 3 (Drosophila)	171170	ENSMUSG00000036109
1434004_at	0.4015	Dhps	deoxyhypusine synthase	330817	ENSMUSG00000060038
1429776_a_at	0.4103	Dnajb6	DnaJ (Hsp40) homolog, subfamily B, member 6	23950	ENSMUSG00000029131
1416093_a_at	0.5553	Mrpl20	mitochondrial ribosomal protein L20	66448	ENSMUSG00000029066
1439777_at	-0.4144	Celf2	CUGBP, Elav-like family member 2	14007	ENSMUSG00000002107
1429709_at	0.3934	Pmpcb	peptidase (mitochondrial processing) beta	73078	ENSMUSG00000029017
1426958_at	0.4026	Rps9	ribosomal protein S9	76846	ENSMUSG00000006333
1433689_s_at	0.5417	Rps9	ribosomal protein S9	76846	ENSMUSG00000006333
1450048_a_at	0.4154	Idh2	isocitrate dehydrogenase 2 (NADP+), mitochondrial	269951	ENSMUSG00000030541
1455713_x_at	-0.4264	Phb2	prohibitin 2	12034	ENSMUSG00000004264
1445440_at	-0.4	Ccdc88a	coiled coil domain containing 88A	108686	ENSMUSG00000032740
1416553_at	0.5558	Stra13	stimulated by retinoic acid 13	20892	ENSMUSG00000025144
1427578_a_at	0.4229	Eif6	eukaryotic translation initiation factor 6	16418	ENSMUSG00000027613
1448669_at	-0.4292	Dkk3	dickkopf homolog 3 (Xenopus laevis)	50781	ENSMUSG00000030772
1449343_s_at	0.388	Sin3a	transcriptional regulator, SIN3A (yeast)	20466	ENSMUSG00000042557
1423299_at	0.4198	Txnl1	thioredoxin-like 1	53382	ENSMUSG00000024583
1425599_a_at	0.4583	Gatad1	GATA zinc finger domain containing 1	67210	ENSMUSG00000007415
1434159_at	-0.4204	Stk4	serine/threonine kinase 4	58231	ENSMUSG00000018209
1428254_at	-0.4264	Purb	purine rich element binding protein B	19291	ENSMUSG00000094483
1456888_at	0.3963	Pfkfb4	6-phosphofructo-2-kinase/fructose-2,6-biphosphatase 4	270198	ENSMUSG00000025648
1418228_at	0.4644	Nfu1	NFU1 iron-sulfur cluster scaffold homolog (S. cerevisiae)	56748	ENSMUSG00000029993
1451408_at	0.4444	Trub2	TruB pseudouridine (psi) synthase homolog 2 (E. coli)	227682	ENSMUSG00000039826
1416220_at	0.4053	Spcs1	signal peptidase complex subunit 1 homolog (S. cerevisiae)	69019	ENSMUSG00000021917
1460181_at	0.3966	Stmn3	stathmin-like 3	20262	ENSMUSG00000027581
1416764_at	0.4158	Fis1	fission 1 (mitochondrial outer membrane) homolog (yeast)	66437	ENSMUSG00000019054
1448971_at	0.441	2410022L05Rik	RIKEN cDNA 2410022L05 gene	66423	ENSMUSG00000031458
1448119_at	0.4632	Bpgm	2,3-bisphosphoglycerate mutase	12183	ENSMUSG00000038871
1415864_at	0.434	Bpgm	2,3-bisphosphoglycerate mutase	12183	ENSMUSG00000038871
1448387_at	0.3943	Rbx1	ring-box 1	56438	ENSMUSG00000022400
1443843_x_at	-0.4012	Rpl9	ribosomal protein L9	20005	ENSMUSG00000047215
1437064_at	-0.4398	Ar	androgen receptor	11835	ENSMUSG00000046532
1448420_a_at	0.409	Fbxl12	F-box and leucine-rich repeat protein 12	30843	ENSMUSG00000066892
1430780_a_at	0.4086	Pmm1	phosphomannomutase 1	29858	ENSMUSG00000022474
1432462_a_at	0.474	Med27	mediator complex subunit 27	68975	ENSMUSG00000026799
1415677_at	0.3874	Dhrs1	dehydrogenase/reductase (SDR family) member 1	52585	ENSMUSG00000002332
1451164_a_at	0.5042	Mrps18b	mitochondrial ribosomal protein S18B	66973	ENSMUSG00000024436
1448718_at	0.4361	Lamtor1	late endosomal/lysosomal adaptor, MAPK and MTOR activator 1	66508	ENSMUSG00000030842
1448905_at	0.4337	Nme3	NME/NM23 nucleoside diphosphate kinase 3	79059	ENSMUSG00000073435
1421530_a_at	0.3899	Grm8	glutamate receptor, metabotropic 8	14823	ENSMUSG00000024211
1452341_at	0.433	Echs1	enoyl Coenzyme A hydratase, short chain, 1, mitochondrial	93747	ENSMUSG00000025465
1452026_a_at	0.4353	Pla2g12a	phospholipase A2, group XIIA	66350	ENSMUSG00000027999
1421872_at	0.4076	Rab24	RAB24, member RAS oncogene family	19336	ENSMUSG00000034789
1421873_s_at	0.4295	Rab24	RAB24, member RAS oncogene family	19336	ENSMUSG00000034789
1429079_a_at	0.442	Mef2b	myocyte enhancer factor 2B	17259	ENSMUSG00000002345,ENSMUSG00000079033
1426373_at	-0.4173	Ski	ski sarcoma viral oncogene homolog (avian)	20481	ENSMUSG00000029050
1452173_at	0.4082	Hadha	hydroxyacyl-Coenzyme A dehydrogenase/3-ketoacyl-Coenzyme A thiolase/enoyl-Coenzyme A hydratase (trifunctional protein), alpha subunit	97212	ENSMUSG00000025745
1436180_at	-0.4146	Dnajc5	DnaJ (Hsp40) homolog, subfamily C, member 5	13002	ENSMUSG00000000826
1423372_at	0.4309	Pole4	polymerase (DNA-directed), epsilon 4 (p12 subunit)	66979	ENSMUSG00000030042
1423409_a_at	0.3984	Chtop	chromatin target of PRMT1	66511	ENSMUSG00000001017
biological process	cellular respiration	GO:0045333
C=74;O=9;E=1.67;R=5.39;rawP=4.19e-05;adjP=0.0114
Probe Set ID	R	Gene Symbol	Description	Entrez ID	Ensemble Gene Stable ID
1433984_a_at	-0.4061	Mdh2	malate dehydrogenase 2, NAD (mitochondrial)	17448	ENSMUSG00000019179
1427282_a_at	0.3939	Fxn	frataxin	14297	ENSMUSG00000059363
1450048_a_at	0.4154	Idh2	isocitrate dehydrogenase 2 (NADP+), mitochondrial	269951	ENSMUSG00000030541
1422976_x_at	0.4927	Ndufa7	NADH dehydrogenase (ubiquinone) 1 alpha subcomplex, 7 (B14.5a)	66416	ENSMUSG00000041881
1455749_x_at	0.4688	Ndufa7	NADH dehydrogenase (ubiquinone) 1 alpha subcomplex, 7 (B14.5a)	66416	ENSMUSG00000041881
1428360_x_at	0.527	Ndufa7	NADH dehydrogenase (ubiquinone) 1 alpha subcomplex, 7 (B14.5a)	66416	ENSMUSG00000041881
1450818_a_at	0.4138	Ndufa7	NADH dehydrogenase (ubiquinone) 1 alpha subcomplex, 7 (B14.5a)	66416	ENSMUSG00000041881
1436567_a_at	0.5276	Ndufa7	NADH dehydrogenase (ubiquinone) 1 alpha subcomplex, 7 (B14.5a)	66416	ENSMUSG00000041881
1424364_a_at	0.4175	Uqcr10	ubiquinol-cytochrome c reductase, complex III subunit X	66152	ENSMUSG00000059534
1451088_a_at	0.4332	Oxa1l	oxidase assembly 1-like	69089	ENSMUSG00000000959
1416849_at	0.4703	Cisd1	CDGSH iron sulfur domain 1	52637	ENSMUSG00000037710
1416837_at	0.4039	Bax	BCL2-associated X protein	12028	ENSMUSG00000003873
1416789_at	0.4437	Idh3g	isocitrate dehydrogenase 3 (NAD+), gamma	15929	ENSMUSG00000002010
biological process	single-organism metabolic process	GO:0044710
C=7664;O=211;E=172.98;R=1.22;rawP=4.53e-05;adjP=0.0114
Probe Set ID	R	Gene Symbol	Description	Entrez ID	Ensemble Gene Stable ID
1419536_a_at	0.3952	Rela	v-rel reticuloendotheliosis viral oncogene homolog A (avian)	19697	ENSMUSG00000024927
1450683_at	0.4041	Tagln3	transgelin 3	56370	ENSMUSG00000022658
1438991_x_at	-0.3968	Ppp2r1a	protein phosphatase 2 (formerly 2A), regulatory subunit A (PR 65), alpha isoform	51792	ENSMUSG00000007564
1438383_x_at	-0.4141	Ppp2r1a	protein phosphatase 2 (formerly 2A), regulatory subunit A (PR 65), alpha isoform	51792	ENSMUSG00000007564
1448100_at	-0.4817	4833439L19Rik	RIKEN cDNA 4833439L19 gene	97820	ENSMUSG00000025871
1438443_at	-0.4463	Zbtb20	zinc finger and BTB domain containing 20	56490	ENSMUSG00000022708
1451088_a_at	0.4332	Oxa1l	oxidase assembly 1-like	69089	ENSMUSG00000000959
1456170_x_at	-0.3981	Calr	calreticulin	12317	ENSMUSG00000003814
1417606_a_at	-0.4667	Calr	calreticulin	12317	ENSMUSG00000003814
1430634_a_at	0.4225	Pfkp	phosphofructokinase, platelet	56421	ENSMUSG00000021196
1428515_at	0.4139	Zswim7	zinc finger, SWIM-type containing 7	69747	ENSMUSG00000014243
1417010_at	-0.385	Zfp238	zinc finger protein 238	30928	ENSMUSG00000063659
1426427_at	0.4891	Ttll1	tubulin tyrosine ligase-like 1	319953	ENSMUSG00000022442
1417999_at	-0.4163	Itm2b	integral membrane protein 2B	16432	ENSMUSG00000022108
1435991_at	-0.4158	Nr3c2	nuclear receptor subfamily 3, group C, member 2	110784	ENSMUSG00000031618
1433520_at	-0.4331	Scap	SREBF chaperone	235623	ENSMUSG00000032485
1460725_at	0.3976	Xpa	xeroderma pigmentosum, complementation group A	22590	ENSMUSG00000028329
1434370_s_at	0.3945	Faf1	Fas-associated factor 1	14084	ENSMUSG00000010517
1423765_at	0.3952	Athl1	ATH1, acid trehalase-like 1 (yeast)	212974	ENSMUSG00000062031
1417287_at	0.4165	H13	histocompatibility 13	14950	ENSMUSG00000019188
1450405_at	0.417	Mrpl19	mitochondrial ribosomal protein L19	56284	ENSMUSG00000030045
1417918_at	0.4001	Mrpl11	mitochondrial ribosomal protein L11	66419	ENSMUSG00000024902
1448286_at	0.4051	Hsd17b10	hydroxysteroid (17-beta) dehydrogenase 10	15108	ENSMUSG00000025260
1451943_a_at	0.4764	Ppm1a	protein phosphatase 1A, magnesium dependent, alpha isoform	19042	ENSMUSG00000021096
1416332_at	0.4426	Cirbp	cold inducible RNA binding protein	12696	ENSMUSG00000045193
1426836_s_at	-0.3917	Metap1	methionyl aminopeptidase 1	75624	ENSMUSG00000005813
1426414_a_at	0.4052	Rnf7	ring finger protein 7	19823	ENSMUSG00000051234
1424685_at	0.403	Exosc4	exosome component 4	109075	ENSMUSG00000034259
1423814_at	0.4275	Ddx41	DEAD (Asp-Glu-Ala-Asp) box polypeptide 41	72935	ENSMUSG00000021494
1449316_at	0.3892	Cyp4f15	cytochrome P450, family 4, subfamily f, polypeptide 15	106648	ENSMUSG00000073424
1433834_at	-0.4043	2015-03-06	membrane-associated ring finger (C3HC4) 6	223455	ENSMUSG00000039100
1427282_a_at	0.3939	Fxn	frataxin	14297	ENSMUSG00000059363
1419420_at	-0.4827	St6galnac5	ST6 (alpha-N-acetyl-neuraminyl-2,3-beta-galactosyl-1,3)-N-acetylgalactosaminide alpha-2,6-sialyltransferase 5	26938	ENSMUSG00000039037
1454758_a_at	0.4256	Tsc22d1	TSC22 domain family, member 1	21807	ENSMUSG00000022010
1450776_at	0.4358	Agpat6	1-acylglycerol-3-phosphate O-acyltransferase 6 (lysophosphatidic acid acyltransferase, zeta)	102247	ENSMUSG00000031545
1432489_a_at	0.4544	Wdyhv1	WDYHV motif containing 1	76773	ENSMUSG00000022359
1433535_x_at	-0.4613	Cct2	chaperonin containing Tcp1, subunit 2 (beta)	12461	ENSMUSG00000034024
1448427_at	0.4803	Ndufa6	NADH dehydrogenase (ubiquinone) 1 alpha subcomplex, 6 (B14)	67130	ENSMUSG00000022450
1448292_at	0.4089	Uqcr11	ubiquinol-cytochrome c reductase, complex III subunit XI	66594	ENSMUSG00000020163
1418016_at	-0.473	Pum2	pumilio 2 (Drosophila)	80913	ENSMUSG00000020594
1423820_at	0.5232	Elof1	elongation factor 1 homolog (ELF1, S. cerevisiae)	66126	ENSMUSG00000013822
1417780_at	0.4193	Lass4	LAG1 homolog, ceramide synthase 4	67260	ENSMUSG00000008206
1421083_x_at	0.409	Banf1	barrier to autointegration factor 1	23825	ENSMUSG00000024844
1421081_a_at	0.4055	Banf1	barrier to autointegration factor 1	23825	ENSMUSG00000024844
1434904_at	-0.401	Hivep2	human immunodeficiency virus type I enhancer binding protein 2	15273	ENSMUSG00000015501
1423158_at	0.3981	Gnpnat1	glucosamine-phosphate N-acetyltransferase 1	54342	ENSMUSG00000037722
1425371_at	-0.4209	Polb	polymerase (DNA directed), beta	18970	ENSMUSG00000031536
1428380_at	0.5038	Atraid	all-trans retinoic acid induced differentiation factor	381629	ENSMUSG00000013622
1451462_a_at	0.3971	Ifnar2	interferon (alpha and beta) receptor 2	15976	ENSMUSG00000022971
1423223_a_at	0.4657	Prdx6	peroxiredoxin 6	11758	ENSMUSG00000026701
1416313_at	-0.4669	Mllt11	myeloid/lymphoid or mixed-lineage leukemia (trithorax homolog, Drosophila); translocated to, 11	56772	ENSMUSG00000053192
1417868_a_at	0.5132	Ctsz	cathepsin Z	64138	ENSMUSG00000016256
1417870_x_at	0.4574	Ctsz	cathepsin Z	64138	ENSMUSG00000016256
1422432_at	0.5004	Dbi	diazepam binding inhibitor	13167	ENSMUSG00000026385
1416023_at	0.4447	Fabp3	fatty acid binding protein 3, muscle and heart	14077	ENSMUSG00000028773
1423128_at	0.4028	Aip	aryl-hydrocarbon receptor-interacting protein	11632	ENSMUSG00000024847
1422482_at	0.4138	Ruvbl2	RuvB-like protein 2	20174	ENSMUSG00000003868
1428336_at	0.3877	Agpat4	1-acylglycerol-3-phosphate O-acyltransferase 4 (lysophosphatidic acid acyltransferase, delta)	68262	ENSMUSG00000023827
1434855_at	0.4726	Amdhd2	amidohydrolase domain containing 2	245847	ENSMUSG00000036820
1416834_x_at	0.4474	Ndufb2	NADH dehydrogenase (ubiquinone) 1 beta subcomplex, 2	68198	ENSMUSG00000002416
1448483_a_at	0.3949	Ndufb2	NADH dehydrogenase (ubiquinone) 1 beta subcomplex, 2	68198	ENSMUSG00000002416
1416615_at	0.5067	Clpp	ClpP caseinolytic peptidase, ATP-dependent, proteolytic subunit	53895	ENSMUSG00000002660
1439314_at	-0.3973	Clock	circadian locomotor output cycles kaput	12753	ENSMUSG00000029238
1418660_at	-0.3989	Clock	circadian locomotor output cycles kaput	12753	ENSMUSG00000029238
1425507_at	0.4115	Arfrp1	ADP-ribosylation factor related protein 1	76688	ENSMUSG00000038671
1437969_s_at	0.3896	0610007P22Rik	RIKEN cDNA 0610007P22 gene	68327	ENSMUSG00000015126
1456196_x_at	-0.4117	Fkbp1a	FK506 binding protein 1a	14225	ENSMUSG00000032966
1438958_x_at	-0.4292	Fkbp1a	FK506 binding protein 1a	14225	ENSMUSG00000032966
1451058_at	0.4215	Mcts2	malignant T cell amplified sequence 2	66405	ENSMUSG00000042814
1439755_at	-0.5399	Sipa1l1	signal-induced proliferation-associated 1 like 1	217692	ENSMUSG00000042700
1416349_at	0.4602	Mrpl34	mitochondrial ribosomal protein L34	94065	ENSMUSG00000034880
1450054_at	-0.4064	Add1	adducin 1 (alpha)	11518	ENSMUSG00000029106
1419249_at	-0.4093	Cdk14	cyclin-dependent kinase 14	18647	ENSMUSG00000028926
1452048_at	0.3927	Mrpl12	mitochondrial ribosomal protein L12	56282	ENSMUSG00000039640
1417103_at	0.4389	Ddt	D-dopachrome tautomerase	13202	ENSMUSG00000001666
1427558_s_at	0.5443	Alg12	asparagine-linked glycosylation 12 (alpha-1,6-mannosyltransferase)	223774	ENSMUSG00000035845
1417947_at	0.4711	Pcna	proliferating cell nuclear antigen	18538	ENSMUSG00000027342
1449046_a_at	0.3986	Josd2	Josephin domain containing 2	66124	ENSMUSG00000038695
1430990_s_at	0.4864	Mrpl44	mitochondrial ribosomal protein L44	69163	ENSMUSG00000026248
1433984_a_at	-0.4061	Mdh2	malate dehydrogenase 2, NAD (mitochondrial)	17448	ENSMUSG00000019179
1455358_at	-0.4622	Rbfox1	RNA binding protein, fox-1 homolog (C. elegans) 1	268859	ENSMUSG00000008658
1418314_a_at	-0.4449	Rbfox1	RNA binding protein, fox-1 homolog (C. elegans) 1	268859	ENSMUSG00000008658
1424646_at	0.4468	Uckl1	uridine-cytidine kinase 1-like 1	68556	ENSMUSG00000089917
1457032_at	-0.4205	Ak5	adenylate kinase 5	229949	ENSMUSG00000039058
1417341_a_at	0.4526	Ppp1r2	protein phosphatase 1, regulatory (inhibitor) subunit 2	66849	ENSMUSG00000047714
1425281_a_at	0.4341	Tsc22d3	TSC22 domain family, member 3	14605	ENSMUSG00000031431
1420772_a_at	0.3908	Tsc22d3	TSC22 domain family, member 3	14605	ENSMUSG00000031431
1455242_at	-0.3853	Foxp1	forkhead box P1	108655	ENSMUSG00000030067
1417067_s_at	-0.3924	Adck3	aarF domain containing kinase 3	67426	ENSMUSG00000026489
1423170_at	0.4031	Taf7	TAF7 RNA polymerase II, TATA box binding protein (TBP)-associated factor	24074	ENSMUSG00000051316
1430326_s_at	0.4346	Uqcrq	ubiquinol-cytochrome c reductase, complex III subunit VII	22272	ENSMUSG00000044894
1418377_a_at	0.4532	Siva1	SIVA1, apoptosis-inducing factor	30954	ENSMUSG00000064326
1451504_at	0.3938	Chchd3	coiled-coil-helix-coiled-coil-helix domain containing 3	66075	ENSMUSG00000053768
1422579_at	0.4522	Hspe1	heat shock protein 1 (chaperonin 10)	15528	ENSMUSG00000073676
1426480_at	0.458	Sbds	Shwachman-Bodian-Diamond syndrome homolog (human)	66711	ENSMUSG00000025337
1433939_at	-0.3995	Aff3	AF4/FMR2 family, member 3	16764	ENSMUSG00000037138
1435566_s_at	0.5501	Araf	v-raf murine sarcoma 3611 viral oncogene homolog	11836	ENSMUSG00000001127
1424364_a_at	0.4175	Uqcr10	ubiquinol-cytochrome c reductase, complex III subunit X	66152	ENSMUSG00000059534
1420473_at	-0.3869	Mtpn	myotrophin	14489	ENSMUSG00000029840
1417206_at	0.4141	Urod	uroporphyrinogen decarboxylase	22275	ENSMUSG00000028684
1449137_at	0.4309	Pdha1	pyruvate dehydrogenase E1 alpha 1	18597	ENSMUSG00000031299
1433818_at	0.4167	Agpat3	1-acylglycerol-3-phosphate O-acyltransferase 3	28169	ENSMUSG00000001211
1421051_s_at	0.5256	Vps25	vacuolar protein sorting 25 (yeast)	28084	ENSMUSG00000078656
1423077_at	0.3929	Snx9	sorting nexin 9	66616	NULL
1423255_at	0.4991	Atp6v1g1	ATPase, H+ transporting, lysosomal V1 subunit G1	66290	ENSMUSG00000039105
1419382_a_at	0.4213	Dhrs4	dehydrogenase/reductase (SDR family) member 4	28200	ENSMUSG00000022210
1416904_at	-0.4231	Mbnl1	muscleblind-like 1 (Drosophila)	56758	ENSMUSG00000027763
1424355_a_at	0.3868	Sin3b	transcriptional regulator, SIN3B (yeast)	20467	ENSMUSG00000031622
1427552_a_at	1	Gstz1	glutathione transferase zeta 1 (maleylacetoacetate isomerase)	14874	ENSMUSG00000021033
1417720_at	0.4897	Polr2j	polymerase (RNA) II (DNA directed) polypeptide J	20022	ENSMUSG00000039771
1417052_at	0.4441	Psmb3	proteasome (prosome, macropain) subunit, beta type 3	26446	ENSMUSG00000069744
1416789_at	0.4437	Idh3g	isocitrate dehydrogenase 3 (NAD+), gamma	15929	ENSMUSG00000002010
1449147_at	-0.3849	Chst1	carbohydrate (keratan sulfate Gal-6) sulfotransferase 1	76969	ENSMUSG00000027221
1416276_a_at	-0.4148	Rps4x	ribosomal protein S4, X-linked	20102	ENSMUSG00000031320
1451312_at	0.5365	Ndufs7	NADH dehydrogenase (ubiquinone) Fe-S protein 7	75406	ENSMUSG00000020153
1448266_at	0.4455	Edf1	endothelial differentiation-related factor 1	59022	ENSMUSG00000015092
1452626_a_at	0.519	Fuom	fucose mutarotase	69064	ENSMUSG00000025466
1415729_at	-0.4129	Pdpk1	3-phosphoinositide dependent protein kinase 1	18607	ENSMUSG00000024122
1438216_at	-0.4424	Rreb1	ras responsive element binding protein 1	68750	ENSMUSG00000039087
1449116_a_at	0.4376	Dtymk	deoxythymidylate kinase	21915	ENSMUSG00000026281
1425930_a_at	0.3911	Mlx	MAX-like protein X	21428	ENSMUSG00000017801
1449225_a_at	-0.3888	Mapk8ip2	mitogen-activated protein kinase 8 interacting protein 2	60597	ENSMUSG00000022619
1448869_a_at	0.5052	Mrps16	mitochondrial ribosomal protein S16	66242	ENSMUSG00000049960
1448414_at	0.3884	Rad1	RAD1 homolog (S. pombe)	19355	ENSMUSG00000022248
1432367_a_at	0.3856	Ufd1l	ubiquitin fusion degradation 1 like	22230	ENSMUSG00000005262
1421340_at	0.3906	Map3k5	mitogen-activated protein kinase kinase kinase 5	26408	ENSMUSG00000071369
1436342_a_at	0.4494	Ubxn1	UBX domain protein 1	225896	ENSMUSG00000071655
1418986_a_at	0.4208	Uxt	ubiquitously expressed transcript	22294	ENSMUSG00000001134
1422549_at	0.4532	Arl2	ADP-ribosylation factor-like 2	56327	ENSMUSG00000024944
1419647_a_at	0.46	Ier3	immediate early response 3	15937	ENSMUSG00000003541
1435411_at	-0.4542	Neurod2	neurogenic differentiation 2	18013	ENSMUSG00000038255
1451307_at	0.4382	Mrpl14	mitochondrial ribosomal protein L14	68463	ENSMUSG00000023939
1416837_at	0.4039	Bax	BCL2-associated X protein	12028	ENSMUSG00000003873
1418888_a_at	0.4223	Sepx1	selenoprotein X 1	27361	ENSMUSG00000075705
1460703_at	0.4179	Ascc1	activating signal cointegrator 1 complex subunit 1	69090	ENSMUSG00000044475
1426380_at	-0.4235	Eif4b	eukaryotic translation initiation factor 4B	75705	ENSMUSG00000058655
1431962_a_at	0.4724	Stambp	STAM binding protein	70527	ENSMUSG00000006906
1416317_a_at	0.4315	Stambp	STAM binding protein	70527	ENSMUSG00000006906
1417501_at	0.4271	Fbxo6	F-box protein 6	50762	ENSMUSG00000055401
1417427_at	0.3861	Rnaseh2c	ribonuclease H2, subunit C	68209	ENSMUSG00000024925
1450711_at	-0.4661	Brd4	bromodomain containing 4	57261	ENSMUSG00000024002
1430075_at	-0.3945	Sf3b3	splicing factor 3b, subunit 3	101943	ENSMUSG00000033732
1417515_at	0.3963	Lsm10	U7 snRNP-specific Sm-like protein LSM10	116748	ENSMUSG00000050188
1442514_a_at	-0.3877	Ell3	elongation factor RNA polymerase II-like 3	269344	ENSMUSG00000027246
1422919_at	0.3889	Hrasls	HRAS-like suppressor	27281	ENSMUSG00000022525
1436415_at	0.4015	Med29	mediator complex subunit 29	67224	ENSMUSG00000003444
1437972_s_at	0.3853	Sf3b5	splicing factor 3b, subunit 5	66125	ENSMUSG00000078348
1451185_at	0.4157	Sf3b5	splicing factor 3b, subunit 5	66125	ENSMUSG00000078348
1458285_at	-0.4474	Gria1	glutamate receptor, ionotropic, AMPA1 (alpha 1)	14799	ENSMUSG00000020524
1416245_at	0.4012	Aurkaip1	aurora kinase A interacting protein 1	66077	ENSMUSG00000065990
1454641_at	-0.413	Cggbp1	CGG triplet repeat binding protein 1	106143	ENSMUSG00000054604
1447909_s_at	0.4421	Selk	selenoprotein K	80795	ENSMUSG00000042682
1423225_at	0.4004	Selk	selenoprotein K	80795	ENSMUSG00000042682
1417605_s_at	0.4011	Camk1	calcium/calmodulin-dependent protein kinase I	52163	ENSMUSG00000030272
1417604_at	0.3946	Camk1	calcium/calmodulin-dependent protein kinase I	52163	ENSMUSG00000030272
1460360_at	0.3927	Asrgl1	asparaginase like 1	66514	ENSMUSG00000024654
1419456_at	0.39	Dcxr	dicarbonyl L-xylulose reductase	67880	ENSMUSG00000039450
1457600_x_at	-0.3932	Nkd2	naked cuticle 2 homolog (Drosophila)	72293	ENSMUSG00000021567
1416212_at	0.4508	Magoh	mago-nashi homolog, proliferation-associated (Drosophila)	17149	ENSMUSG00000028609
1416593_at	0.4554	Glrx	glutaredoxin	93692	ENSMUSG00000021591
1416583_at	0.4059	Bad	BCL2-associated agonist of cell death	12015	ENSMUSG00000024959
1421970_a_at	-0.4056	Gria2	glutamate receptor, ionotropic, AMPA2 (alpha 2)	14800	ENSMUSG00000033981
1451650_at	0.4141	Ddo	D-aspartate oxidase	70503	ENSMUSG00000063428
1429613_at	0.389	Dusp28	dual specificity phosphatase 28	67446	ENSMUSG00000047067
1416335_at	0.4628	Mif	macrophage migration inhibitory factor	17319	ENSMUSG00000033307
1417421_at	0.4717	S100a1	S100 calcium binding protein A1	20193	ENSMUSG00000044080
1449558_at	-0.409	F8	coagulation factor VIII	14069	ENSMUSG00000031196
1424108_at	-0.3878	Glo1	glyoxalase 1	109801	ENSMUSG00000024026
1451240_a_at	-0.4037	Glo1	glyoxalase 1	109801	ENSMUSG00000024026
1436121_a_at	0.3935	Nsmce1	non-SMC element 1 homolog (S. cerevisiae)	67711	ENSMUSG00000030750
1429958_x_at	0.4148	Haghl	hydroxyacylglutathione hydrolase-like	68977	ENSMUSG00000061046
1423544_at	0.3861	Ptpn5	protein tyrosine phosphatase, non-receptor type 5	19259	ENSMUSG00000030854
1423553_at	0.4566	Dnajb3	DnaJ (Hsp40) homolog, subfamily B, member 3	15504	ENSMUSG00000081984
1449123_at	0.4079	Itih3	inter-alpha trypsin inhibitor, heavy chain 3	16426	ENSMUSG00000006522
1437473_at	-0.525	Maf	avian musculoaponeurotic fibrosarcoma (v-maf) AS42 oncogene homolog	17132	ENSMUSG00000055435
1422976_x_at	0.4927	Ndufa7	NADH dehydrogenase (ubiquinone) 1 alpha subcomplex, 7 (B14.5a)	66416	ENSMUSG00000041881
1455749_x_at	0.4688	Ndufa7	NADH dehydrogenase (ubiquinone) 1 alpha subcomplex, 7 (B14.5a)	66416	ENSMUSG00000041881
1428360_x_at	0.527	Ndufa7	NADH dehydrogenase (ubiquinone) 1 alpha subcomplex, 7 (B14.5a)	66416	ENSMUSG00000041881
1450818_a_at	0.4138	Ndufa7	NADH dehydrogenase (ubiquinone) 1 alpha subcomplex, 7 (B14.5a)	66416	ENSMUSG00000041881
1436567_a_at	0.5276	Ndufa7	NADH dehydrogenase (ubiquinone) 1 alpha subcomplex, 7 (B14.5a)	66416	ENSMUSG00000041881
1416849_at	0.4703	Cisd1	CDGSH iron sulfur domain 1	52637	ENSMUSG00000037710
1415744_at	0.4057	H2-Ke2	H2-K region expressed gene 2	14976	ENSMUSG00000024309
1419428_a_at	0.4187	Gaa	glucosidase, alpha, acid	14387	ENSMUSG00000025579
1418764_a_at	0.3854	Bpnt1	bisphosphate 3'-nucleotidase 1	23827	ENSMUSG00000026617
1455061_a_at	0.4767	Acaa2	acetyl-Coenzyme A acyltransferase 2 (mitochondrial 3-oxoacyl-Coenzyme A thiolase)	52538	ENSMUSG00000036880
1416766_at	0.3961	Mosc2	MOCO sulphurase C-terminal domain containing 2	67247	ENSMUSG00000073481
1442549_at	-0.4167	Mbnl3	muscleblind-like 3 (Drosophila)	171170	ENSMUSG00000036109
1434004_at	0.4015	Dhps	deoxyhypusine synthase	330817	ENSMUSG00000060038
1429776_a_at	0.4103	Dnajb6	DnaJ (Hsp40) homolog, subfamily B, member 6	23950	ENSMUSG00000029131
1416093_a_at	0.5553	Mrpl20	mitochondrial ribosomal protein L20	66448	ENSMUSG00000029066
1439777_at	-0.4144	Celf2	CUGBP, Elav-like family member 2	14007	ENSMUSG00000002107
1429709_at	0.3934	Pmpcb	peptidase (mitochondrial processing) beta	73078	ENSMUSG00000029017
1426958_at	0.4026	Rps9	ribosomal protein S9	76846	ENSMUSG00000006333
1433689_s_at	0.5417	Rps9	ribosomal protein S9	76846	ENSMUSG00000006333
1450048_a_at	0.4154	Idh2	isocitrate dehydrogenase 2 (NADP+), mitochondrial	269951	ENSMUSG00000030541
1455713_x_at	-0.4264	Phb2	prohibitin 2	12034	ENSMUSG00000004264
1445440_at	-0.4	Ccdc88a	coiled coil domain containing 88A	108686	ENSMUSG00000032740
1416553_at	0.5558	Stra13	stimulated by retinoic acid 13	20892	ENSMUSG00000025144
1427578_a_at	0.4229	Eif6	eukaryotic translation initiation factor 6	16418	ENSMUSG00000027613
1448669_at	-0.4292	Dkk3	dickkopf homolog 3 (Xenopus laevis)	50781	ENSMUSG00000030772
1449343_s_at	0.388	Sin3a	transcriptional regulator, SIN3A (yeast)	20466	ENSMUSG00000042557
1423299_at	0.4198	Txnl1	thioredoxin-like 1	53382	ENSMUSG00000024583
1425599_a_at	0.4583	Gatad1	GATA zinc finger domain containing 1	67210	ENSMUSG00000007415
1434159_at	-0.4204	Stk4	serine/threonine kinase 4	58231	ENSMUSG00000018209
1428254_at	-0.4264	Purb	purine rich element binding protein B	19291	ENSMUSG00000094483
1456888_at	0.3963	Pfkfb4	6-phosphofructo-2-kinase/fructose-2,6-biphosphatase 4	270198	ENSMUSG00000025648
1451408_at	0.4444	Trub2	TruB pseudouridine (psi) synthase homolog 2 (E. coli)	227682	ENSMUSG00000039826
1416220_at	0.4053	Spcs1	signal peptidase complex subunit 1 homolog (S. cerevisiae)	69019	ENSMUSG00000021917
1460181_at	0.3966	Stmn3	stathmin-like 3	20262	ENSMUSG00000027581
1448971_at	0.441	2410022L05Rik	RIKEN cDNA 2410022L05 gene	66423	ENSMUSG00000031458
1448119_at	0.4632	Bpgm	2,3-bisphosphoglycerate mutase	12183	ENSMUSG00000038871
1415864_at	0.434	Bpgm	2,3-bisphosphoglycerate mutase	12183	ENSMUSG00000038871
1448387_at	0.3943	Rbx1	ring-box 1	56438	ENSMUSG00000022400
1443843_x_at	-0.4012	Rpl9	ribosomal protein L9	20005	ENSMUSG00000047215
1437064_at	-0.4398	Ar	androgen receptor	11835	ENSMUSG00000046532
1448420_a_at	0.409	Fbxl12	F-box and leucine-rich repeat protein 12	30843	ENSMUSG00000066892
1430780_a_at	0.4086	Pmm1	phosphomannomutase 1	29858	ENSMUSG00000022474
1432462_a_at	0.474	Med27	mediator complex subunit 27	68975	ENSMUSG00000026799
1415677_at	0.3874	Dhrs1	dehydrogenase/reductase (SDR family) member 1	52585	ENSMUSG00000002332
1451164_a_at	0.5042	Mrps18b	mitochondrial ribosomal protein S18B	66973	ENSMUSG00000024436
1448718_at	0.4361	Lamtor1	late endosomal/lysosomal adaptor, MAPK and MTOR activator 1	66508	ENSMUSG00000030842
1448905_at	0.4337	Nme3	NME/NM23 nucleoside diphosphate kinase 3	79059	ENSMUSG00000073435
1421530_a_at	0.3899	Grm8	glutamate receptor, metabotropic 8	14823	ENSMUSG00000024211
1452341_at	0.433	Echs1	enoyl Coenzyme A hydratase, short chain, 1, mitochondrial	93747	ENSMUSG00000025465
1452026_a_at	0.4353	Pla2g12a	phospholipase A2, group XIIA	66350	ENSMUSG00000027999
1429079_a_at	0.442	Mef2b	myocyte enhancer factor 2B	17259	ENSMUSG00000002345,ENSMUSG00000079033
1426373_at	-0.4173	Ski	ski sarcoma viral oncogene homolog (avian)	20481	ENSMUSG00000029050
1452173_at	0.4082	Hadha	hydroxyacyl-Coenzyme A dehydrogenase/3-ketoacyl-Coenzyme A thiolase/enoyl-Coenzyme A hydratase (trifunctional protein), alpha subunit	97212	ENSMUSG00000025745
1436180_at	-0.4146	Dnajc5	DnaJ (Hsp40) homolog, subfamily C, member 5	13002	ENSMUSG00000000826
1423372_at	0.4309	Pole4	polymerase (DNA-directed), epsilon 4 (p12 subunit)	66979	ENSMUSG00000030042
1423409_a_at	0.3984	Chtop	chromatin target of PRMT1	66511	ENSMUSG00000001017
biological process	cellular component assembly	GO:0022607
C=1253;O=49;E=28.28;R=1.73;rawP=0.0001;adjP=0.0215
Probe Set ID	R	Gene Symbol	Description	Entrez ID	Ensemble Gene Stable ID
1453567_s_at	0.4437	Tmem216	transmembrane protein 216	68642	ENSMUSG00000024667
1451312_at	0.5365	Ndufs7	NADH dehydrogenase (ubiquinone) Fe-S protein 7	75406	ENSMUSG00000020153
1416615_at	0.5067	Clpp	ClpP caseinolytic peptidase, ATP-dependent, proteolytic subunit	53895	ENSMUSG00000002660
1416337_at	0.3959	Uqcrb	ubiquinol-cytochrome c reductase binding protein	67530	ENSMUSG00000021520
1415729_at	-0.4129	Pdpk1	3-phosphoinositide dependent protein kinase 1	18607	ENSMUSG00000024122
1456196_x_at	-0.4117	Fkbp1a	FK506 binding protein 1a	14225	ENSMUSG00000032966
1438958_x_at	-0.4292	Fkbp1a	FK506 binding protein 1a	14225	ENSMUSG00000032966
1418002_at	0.479	Higd2a	HIG1 domain family, member 2A	67044	ENSMUSG00000025868
1451088_a_at	0.4332	Oxa1l	oxidase assembly 1-like	69089	ENSMUSG00000000959
1420259_at	-0.4024	Pkp2	plakophilin 2	67451	ENSMUSG00000041957
1456170_x_at	-0.3981	Calr	calreticulin	12317	ENSMUSG00000003814
1417606_a_at	-0.4667	Calr	calreticulin	12317	ENSMUSG00000003814
1415744_at	0.4057	H2-Ke2	H2-K region expressed gene 2	14976	ENSMUSG00000024309
1430634_a_at	0.4225	Pfkp	phosphofructokinase, platelet	56421	ENSMUSG00000021196
1451746_a_at	0.4145	Atg12	autophagy related 12	67526	ENSMUSG00000032905
1450054_at	-0.4064	Add1	adducin 1 (alpha)	11518	ENSMUSG00000029106
1427735_a_at	0.3964	Acta1	actin, alpha 1, skeletal muscle	11459	ENSMUSG00000031972
1434004_at	0.4015	Dhps	deoxyhypusine synthase	330817	ENSMUSG00000060038
1426427_at	0.4891	Ttll1	tubulin tyrosine ligase-like 1	319953	ENSMUSG00000022442
1439777_at	-0.4144	Celf2	CUGBP, Elav-like family member 2	14007	ENSMUSG00000002107
1422549_at	0.4532	Arl2	ADP-ribosylation factor-like 2	56327	ENSMUSG00000024944
1422694_at	0.4001	Ttyh1	tweety homolog 1 (Drosophila)	57776	ENSMUSG00000030428
1434370_s_at	0.3945	Faf1	Fas-associated factor 1	14084	ENSMUSG00000010517
1448286_at	0.4051	Hsd17b10	hydroxysteroid (17-beta) dehydrogenase 10	15108	ENSMUSG00000025260
1445440_at	-0.4	Ccdc88a	coiled coil domain containing 88A	108686	ENSMUSG00000032740
1429778_at	0.4421	Optn	optineurin	71648	ENSMUSG00000026672
1451943_a_at	0.4764	Ppm1a	protein phosphatase 1A, magnesium dependent, alpha isoform	19042	ENSMUSG00000021096
1416837_at	0.4039	Bax	BCL2-associated X protein	12028	ENSMUSG00000003873
1455242_at	-0.3853	Foxp1	forkhead box P1	108655	ENSMUSG00000030067
1455006_at	0.5302	2310016M24Rik	RIKEN cDNA 2310016M24 gene	66379	ENSMUSG00000023020
1416332_at	0.4426	Cirbp	cold inducible RNA binding protein	12696	ENSMUSG00000045193
1427578_a_at	0.4229	Eif6	eukaryotic translation initiation factor 6	16418	ENSMUSG00000027613
1418185_at	0.5046	Ndufaf3	NADH dehydrogenase (ubiquinone) 1 alpha subcomplex, assembly factor 3	66706	ENSMUSG00000070283
1427282_a_at	0.3939	Fxn	frataxin	14297	ENSMUSG00000059363
1426480_at	0.458	Sbds	Shwachman-Bodian-Diamond syndrome homolog (human)	66711	ENSMUSG00000025337
1433535_x_at	-0.4613	Cct2	chaperonin containing Tcp1, subunit 2 (beta)	12461	ENSMUSG00000034024
1420473_at	-0.3869	Mtpn	myotrophin	14489	ENSMUSG00000029840
1418228_at	0.4644	Nfu1	NFU1 iron-sulfur cluster scaffold homolog (S. cerevisiae)	56748	ENSMUSG00000029993
1428469_a_at	0.3917	Dzip1	DAZ interacting protein 1	66573	ENSMUSG00000042156
1437064_at	-0.4398	Ar	androgen receptor	11835	ENSMUSG00000046532
1418016_at	-0.473	Pum2	pumilio 2 (Drosophila)	80913	ENSMUSG00000020594
1416226_at	0.4322	Arpc1b	actin related protein 2/3 complex, subunit 1B	11867	ENSMUSG00000029622
1423077_at	0.3929	Snx9	sorting nexin 9	66616	NULL
1419382_a_at	0.4213	Dhrs4	dehydrogenase/reductase (SDR family) member 4	28200	ENSMUSG00000022210
1416904_at	-0.4231	Mbnl1	muscleblind-like 1 (Drosophila)	56758	ENSMUSG00000027763
1423223_a_at	0.4657	Prdx6	peroxiredoxin 6	11758	ENSMUSG00000026701
1419456_at	0.39	Dcxr	dicarbonyl L-xylulose reductase	67880	ENSMUSG00000039450
1426373_at	-0.4173	Ski	ski sarcoma viral oncogene homolog (avian)	20481	ENSMUSG00000029050
1416583_at	0.4059	Bad	BCL2-associated agonist of cell death	12015	ENSMUSG00000024959
1421970_a_at	-0.4056	Gria2	glutamate receptor, ionotropic, AMPA2 (alpha 2)	14800	ENSMUSG00000033981
1416335_at	0.4628	Mif	macrophage migration inhibitory factor	17319	ENSMUSG00000033307
biological process	cellular macromolecular complex assembly	GO:0034622
C=393;O=21;E=8.87;R=2.37;rawP=0.0002;adjP=0.0301
Probe Set ID	R	Gene Symbol	Description	Entrez ID	Ensemble Gene Stable ID
1451312_at	0.5365	Ndufs7	NADH dehydrogenase (ubiquinone) Fe-S protein 7	75406	ENSMUSG00000020153
1418185_at	0.5046	Ndufaf3	NADH dehydrogenase (ubiquinone) 1 alpha subcomplex, assembly factor 3	66706	ENSMUSG00000070283
1426480_at	0.458	Sbds	Shwachman-Bodian-Diamond syndrome homolog (human)	66711	ENSMUSG00000025337
1456196_x_at	-0.4117	Fkbp1a	FK506 binding protein 1a	14225	ENSMUSG00000032966
1438958_x_at	-0.4292	Fkbp1a	FK506 binding protein 1a	14225	ENSMUSG00000032966
1433535_x_at	-0.4613	Cct2	chaperonin containing Tcp1, subunit 2 (beta)	12461	ENSMUSG00000034024
1418002_at	0.479	Higd2a	HIG1 domain family, member 2A	67044	ENSMUSG00000025868
1451088_a_at	0.4332	Oxa1l	oxidase assembly 1-like	69089	ENSMUSG00000000959
1420473_at	-0.3869	Mtpn	myotrophin	14489	ENSMUSG00000029840
1456170_x_at	-0.3981	Calr	calreticulin	12317	ENSMUSG00000003814
1417606_a_at	-0.4667	Calr	calreticulin	12317	ENSMUSG00000003814
1415744_at	0.4057	H2-Ke2	H2-K region expressed gene 2	14976	ENSMUSG00000024309
1418016_at	-0.473	Pum2	pumilio 2 (Drosophila)	80913	ENSMUSG00000020594
1450054_at	-0.4064	Add1	adducin 1 (alpha)	11518	ENSMUSG00000029106
1416226_at	0.4322	Arpc1b	actin related protein 2/3 complex, subunit 1B	11867	ENSMUSG00000029622
1439777_at	-0.4144	Celf2	CUGBP, Elav-like family member 2	14007	ENSMUSG00000002107
1423077_at	0.3929	Snx9	sorting nexin 9	66616	NULL
1416904_at	-0.4231	Mbnl1	muscleblind-like 1 (Drosophila)	56758	ENSMUSG00000027763
1422549_at	0.4532	Arl2	ADP-ribosylation factor-like 2	56327	ENSMUSG00000024944
1451943_a_at	0.4764	Ppm1a	protein phosphatase 1A, magnesium dependent, alpha isoform	19042	ENSMUSG00000021096
1455006_at	0.5302	2310016M24Rik	RIKEN cDNA 2310016M24 gene	66379	ENSMUSG00000023020
1416332_at	0.4426	Cirbp	cold inducible RNA binding protein	12696	ENSMUSG00000045193
1427578_a_at	0.4229	Eif6	eukaryotic translation initiation factor 6	16418	ENSMUSG00000027613
biological process	cellular component biogenesis	GO:0044085
C=1376;O=52;E=31.06;R=1.67;rawP=0.0002;adjP=0.0301
Probe Set ID	R	Gene Symbol	Description	Entrez ID	Ensemble Gene Stable ID
1453567_s_at	0.4437	Tmem216	transmembrane protein 216	68642	ENSMUSG00000024667
1451312_at	0.5365	Ndufs7	NADH dehydrogenase (ubiquinone) Fe-S protein 7	75406	ENSMUSG00000020153
1416615_at	0.5067	Clpp	ClpP caseinolytic peptidase, ATP-dependent, proteolytic subunit	53895	ENSMUSG00000002660
1416337_at	0.3959	Uqcrb	ubiquinol-cytochrome c reductase binding protein	67530	ENSMUSG00000021520
1415729_at	-0.4129	Pdpk1	3-phosphoinositide dependent protein kinase 1	18607	ENSMUSG00000024122
1437969_s_at	0.3896	0610007P22Rik	RIKEN cDNA 0610007P22 gene	68327	ENSMUSG00000015126
1456196_x_at	-0.4117	Fkbp1a	FK506 binding protein 1a	14225	ENSMUSG00000032966
1438958_x_at	-0.4292	Fkbp1a	FK506 binding protein 1a	14225	ENSMUSG00000032966
1418002_at	0.479	Higd2a	HIG1 domain family, member 2A	67044	ENSMUSG00000025868
1451088_a_at	0.4332	Oxa1l	oxidase assembly 1-like	69089	ENSMUSG00000000959
1420259_at	-0.4024	Pkp2	plakophilin 2	67451	ENSMUSG00000041957
1456170_x_at	-0.3981	Calr	calreticulin	12317	ENSMUSG00000003814
1417606_a_at	-0.4667	Calr	calreticulin	12317	ENSMUSG00000003814
1415744_at	0.4057	H2-Ke2	H2-K region expressed gene 2	14976	ENSMUSG00000024309
1430634_a_at	0.4225	Pfkp	phosphofructokinase, platelet	56421	ENSMUSG00000021196
1451746_a_at	0.4145	Atg12	autophagy related 12	67526	ENSMUSG00000032905
1450054_at	-0.4064	Add1	adducin 1 (alpha)	11518	ENSMUSG00000029106
1427735_a_at	0.3964	Acta1	actin, alpha 1, skeletal muscle	11459	ENSMUSG00000031972
1434004_at	0.4015	Dhps	deoxyhypusine synthase	330817	ENSMUSG00000060038
1426427_at	0.4891	Ttll1	tubulin tyrosine ligase-like 1	319953	ENSMUSG00000022442
1439777_at	-0.4144	Celf2	CUGBP, Elav-like family member 2	14007	ENSMUSG00000002107
1422549_at	0.4532	Arl2	ADP-ribosylation factor-like 2	56327	ENSMUSG00000024944
1422694_at	0.4001	Ttyh1	tweety homolog 1 (Drosophila)	57776	ENSMUSG00000030428
1434370_s_at	0.3945	Faf1	Fas-associated factor 1	14084	ENSMUSG00000010517
1448286_at	0.4051	Hsd17b10	hydroxysteroid (17-beta) dehydrogenase 10	15108	ENSMUSG00000025260
1445440_at	-0.4	Ccdc88a	coiled coil domain containing 88A	108686	ENSMUSG00000032740
1429778_at	0.4421	Optn	optineurin	71648	ENSMUSG00000026672
1451943_a_at	0.4764	Ppm1a	protein phosphatase 1A, magnesium dependent, alpha isoform	19042	ENSMUSG00000021096
1416837_at	0.4039	Bax	BCL2-associated X protein	12028	ENSMUSG00000003873
1455242_at	-0.3853	Foxp1	forkhead box P1	108655	ENSMUSG00000030067
1455006_at	0.5302	2310016M24Rik	RIKEN cDNA 2310016M24 gene	66379	ENSMUSG00000023020
1416332_at	0.4426	Cirbp	cold inducible RNA binding protein	12696	ENSMUSG00000045193
1426533_at	0.4832	Nop56	NOP56 ribonucleoprotein homolog (yeast)	67134	ENSMUSG00000027405
1427578_a_at	0.4229	Eif6	eukaryotic translation initiation factor 6	16418	ENSMUSG00000027613
1424685_at	0.403	Exosc4	exosome component 4	109075	ENSMUSG00000034259
1418185_at	0.5046	Ndufaf3	NADH dehydrogenase (ubiquinone) 1 alpha subcomplex, assembly factor 3	66706	ENSMUSG00000070283
1427282_a_at	0.3939	Fxn	frataxin	14297	ENSMUSG00000059363
1426480_at	0.458	Sbds	Shwachman-Bodian-Diamond syndrome homolog (human)	66711	ENSMUSG00000025337
1433535_x_at	-0.4613	Cct2	chaperonin containing Tcp1, subunit 2 (beta)	12461	ENSMUSG00000034024
1420473_at	-0.3869	Mtpn	myotrophin	14489	ENSMUSG00000029840
1418228_at	0.4644	Nfu1	NFU1 iron-sulfur cluster scaffold homolog (S. cerevisiae)	56748	ENSMUSG00000029993
1428469_a_at	0.3917	Dzip1	DAZ interacting protein 1	66573	ENSMUSG00000042156
1437064_at	-0.4398	Ar	androgen receptor	11835	ENSMUSG00000046532
1418016_at	-0.473	Pum2	pumilio 2 (Drosophila)	80913	ENSMUSG00000020594
1416226_at	0.4322	Arpc1b	actin related protein 2/3 complex, subunit 1B	11867	ENSMUSG00000029622
1423077_at	0.3929	Snx9	sorting nexin 9	66616	NULL
1419382_a_at	0.4213	Dhrs4	dehydrogenase/reductase (SDR family) member 4	28200	ENSMUSG00000022210
1416904_at	-0.4231	Mbnl1	muscleblind-like 1 (Drosophila)	56758	ENSMUSG00000027763
1423223_a_at	0.4657	Prdx6	peroxiredoxin 6	11758	ENSMUSG00000026701
1419456_at	0.39	Dcxr	dicarbonyl L-xylulose reductase	67880	ENSMUSG00000039450
1426373_at	-0.4173	Ski	ski sarcoma viral oncogene homolog (avian)	20481	ENSMUSG00000029050
1416583_at	0.4059	Bad	BCL2-associated agonist of cell death	12015	ENSMUSG00000024959
1421970_a_at	-0.4056	Gria2	glutamate receptor, ionotropic, AMPA2 (alpha 2)	14800	ENSMUSG00000033981
1416335_at	0.4628	Mif	macrophage migration inhibitory factor	17319	ENSMUSG00000033307
biological process	macromolecular complex assembly	GO:0065003
C=813;O=35;E=18.35;R=1.91;rawP=0.0002;adjP=0.0301
Probe Set ID	R	Gene Symbol	Description	Entrez ID	Ensemble Gene Stable ID
1451312_at	0.5365	Ndufs7	NADH dehydrogenase (ubiquinone) Fe-S protein 7	75406	ENSMUSG00000020153
1416615_at	0.5067	Clpp	ClpP caseinolytic peptidase, ATP-dependent, proteolytic subunit	53895	ENSMUSG00000002660
1416337_at	0.3959	Uqcrb	ubiquinol-cytochrome c reductase binding protein	67530	ENSMUSG00000021520
1456196_x_at	-0.4117	Fkbp1a	FK506 binding protein 1a	14225	ENSMUSG00000032966
1438958_x_at	-0.4292	Fkbp1a	FK506 binding protein 1a	14225	ENSMUSG00000032966
1418002_at	0.479	Higd2a	HIG1 domain family, member 2A	67044	ENSMUSG00000025868
1451088_a_at	0.4332	Oxa1l	oxidase assembly 1-like	69089	ENSMUSG00000000959
1456170_x_at	-0.3981	Calr	calreticulin	12317	ENSMUSG00000003814
1417606_a_at	-0.4667	Calr	calreticulin	12317	ENSMUSG00000003814
1415744_at	0.4057	H2-Ke2	H2-K region expressed gene 2	14976	ENSMUSG00000024309
1430634_a_at	0.4225	Pfkp	phosphofructokinase, platelet	56421	ENSMUSG00000021196
1450054_at	-0.4064	Add1	adducin 1 (alpha)	11518	ENSMUSG00000029106
1434004_at	0.4015	Dhps	deoxyhypusine synthase	330817	ENSMUSG00000060038
1439777_at	-0.4144	Celf2	CUGBP, Elav-like family member 2	14007	ENSMUSG00000002107
1422549_at	0.4532	Arl2	ADP-ribosylation factor-like 2	56327	ENSMUSG00000024944
1434370_s_at	0.3945	Faf1	Fas-associated factor 1	14084	ENSMUSG00000010517
1448286_at	0.4051	Hsd17b10	hydroxysteroid (17-beta) dehydrogenase 10	15108	ENSMUSG00000025260
1429778_at	0.4421	Optn	optineurin	71648	ENSMUSG00000026672
1451943_a_at	0.4764	Ppm1a	protein phosphatase 1A, magnesium dependent, alpha isoform	19042	ENSMUSG00000021096
1455006_at	0.5302	2310016M24Rik	RIKEN cDNA 2310016M24 gene	66379	ENSMUSG00000023020
1416837_at	0.4039	Bax	BCL2-associated X protein	12028	ENSMUSG00000003873
1416332_at	0.4426	Cirbp	cold inducible RNA binding protein	12696	ENSMUSG00000045193
1427578_a_at	0.4229	Eif6	eukaryotic translation initiation factor 6	16418	ENSMUSG00000027613
1418185_at	0.5046	Ndufaf3	NADH dehydrogenase (ubiquinone) 1 alpha subcomplex, assembly factor 3	66706	ENSMUSG00000070283
1426480_at	0.458	Sbds	Shwachman-Bodian-Diamond syndrome homolog (human)	66711	ENSMUSG00000025337
1433535_x_at	-0.4613	Cct2	chaperonin containing Tcp1, subunit 2 (beta)	12461	ENSMUSG00000034024
1420473_at	-0.3869	Mtpn	myotrophin	14489	ENSMUSG00000029840
1437064_at	-0.4398	Ar	androgen receptor	11835	ENSMUSG00000046532
1418016_at	-0.473	Pum2	pumilio 2 (Drosophila)	80913	ENSMUSG00000020594
1416226_at	0.4322	Arpc1b	actin related protein 2/3 complex, subunit 1B	11867	ENSMUSG00000029622
1423077_at	0.3929	Snx9	sorting nexin 9	66616	NULL
1416904_at	-0.4231	Mbnl1	muscleblind-like 1 (Drosophila)	56758	ENSMUSG00000027763
1419382_a_at	0.4213	Dhrs4	dehydrogenase/reductase (SDR family) member 4	28200	ENSMUSG00000022210
1419456_at	0.39	Dcxr	dicarbonyl L-xylulose reductase	67880	ENSMUSG00000039450
1426373_at	-0.4173	Ski	ski sarcoma viral oncogene homolog (avian)	20481	ENSMUSG00000029050
1421970_a_at	-0.4056	Gria2	glutamate receptor, ionotropic, AMPA2 (alpha 2)	14800	ENSMUSG00000033981
1416335_at	0.4628	Mif	macrophage migration inhibitory factor	17319	ENSMUSG00000033307
molecular function	structural constituent of ribosome	GO:0003735
C=97;O=13;E=2.22;R=5.85;rawP=3.17e-07;adjP=0.0001
Probe Set ID	R	Gene Symbol	Description	Entrez ID	Ensemble Gene Stable ID
1416276_a_at	-0.4148	Rps4x	ribosomal protein S4, X-linked	20102	ENSMUSG00000031320
1416093_a_at	0.5553	Mrpl20	mitochondrial ribosomal protein L20	66448	ENSMUSG00000029066
1426958_at	0.4026	Rps9	ribosomal protein S9	76846	ENSMUSG00000006333
1433689_s_at	0.5417	Rps9	ribosomal protein S9	76846	ENSMUSG00000006333
1450405_at	0.417	Mrpl19	mitochondrial ribosomal protein L19	56284	ENSMUSG00000030045
1417918_at	0.4001	Mrpl11	mitochondrial ribosomal protein L11	66419	ENSMUSG00000024902
1416349_at	0.4602	Mrpl34	mitochondrial ribosomal protein L34	94065	ENSMUSG00000034880
1450865_s_at	0.3921	Mrps24	mitochondrial ribosomal protein S24	64660	ENSMUSG00000020477
1448869_a_at	0.5052	Mrps16	mitochondrial ribosomal protein S16	66242	ENSMUSG00000049960
1451307_at	0.4382	Mrpl14	mitochondrial ribosomal protein L14	68463	ENSMUSG00000023939
1443843_x_at	-0.4012	Rpl9	ribosomal protein L9	20005	ENSMUSG00000047215
1428153_at	0.4679	Mrps10	mitochondrial ribosomal protein S10	64657	ENSMUSG00000034729
1452048_at	0.3927	Mrpl12	mitochondrial ribosomal protein L12	56282	ENSMUSG00000039640
1451164_a_at	0.5042	Mrps18b	mitochondrial ribosomal protein S18B	66973	ENSMUSG00000024436
molecular function	ubiquinol-cytochrome-c reductase activity	GO:0008121
C=5;O=3;E=0.11;R=26.21;rawP=0.0001;adjP=0.0106
Probe Set ID	R	Gene Symbol	Description	Entrez ID	Ensemble Gene Stable ID
1448292_at	0.4089	Uqcr11	ubiquinol-cytochrome c reductase, complex III subunit XI	66594	ENSMUSG00000020163
1430326_s_at	0.4346	Uqcrq	ubiquinol-cytochrome c reductase, complex III subunit VII	22272	ENSMUSG00000044894
1424364_a_at	0.4175	Uqcr10	ubiquinol-cytochrome c reductase, complex III subunit X	66152	ENSMUSG00000059534
molecular function	oxidoreductase activity, acting on diphenols and related substances as donors, cytochrome as acceptor	GO:0016681
C=5;O=3;E=0.11;R=26.21;rawP=0.0001;adjP=0.0106
Probe Set ID	R	Gene Symbol	Description	Entrez ID	Ensemble Gene Stable ID
1448292_at	0.4089	Uqcr11	ubiquinol-cytochrome c reductase, complex III subunit XI	66594	ENSMUSG00000020163
1430326_s_at	0.4346	Uqcrq	ubiquinol-cytochrome c reductase, complex III subunit VII	22272	ENSMUSG00000044894
1424364_a_at	0.4175	Uqcr10	ubiquinol-cytochrome c reductase, complex III subunit X	66152	ENSMUSG00000059534
molecular function	oxidoreductase activity, acting on diphenols and related substances as donors	GO:0016679
C=6;O=3;E=0.14;R=21.84;rawP=0.0002;adjP=0.0158
Probe Set ID	R	Gene Symbol	Description	Entrez ID	Ensemble Gene Stable ID
1448292_at	0.4089	Uqcr11	ubiquinol-cytochrome c reductase, complex III subunit XI	66594	ENSMUSG00000020163
1430326_s_at	0.4346	Uqcrq	ubiquinol-cytochrome c reductase, complex III subunit VII	22272	ENSMUSG00000044894
1424364_a_at	0.4175	Uqcr10	ubiquinol-cytochrome c reductase, complex III subunit X	66152	ENSMUSG00000059534
molecular function	rRNA binding	GO:0019843
C=28;O=5;E=0.64;R=7.80;rawP=0.0004;adjP=0.0254
Probe Set ID	R	Gene Symbol	Description	Entrez ID	Ensemble Gene Stable ID
1416276_a_at	-0.4148	Rps4x	ribosomal protein S4, X-linked	20102	ENSMUSG00000031320
1416093_a_at	0.5553	Mrpl20	mitochondrial ribosomal protein L20	66448	ENSMUSG00000029066
1416332_at	0.4426	Cirbp	cold inducible RNA binding protein	12696	ENSMUSG00000045193
1426958_at	0.4026	Rps9	ribosomal protein S9	76846	ENSMUSG00000006333
1433689_s_at	0.5417	Rps9	ribosomal protein S9	76846	ENSMUSG00000006333
1426480_at	0.458	Sbds	Shwachman-Bodian-Diamond syndrome homolog (human)	66711	ENSMUSG00000025337
molecular function	structural molecule activity	GO:0005198
C=356;O=19;E=8.15;R=2.33;rawP=0.0006;adjP=0.0317
Probe Set ID	R	Gene Symbol	Description	Entrez ID	Ensemble Gene Stable ID
1416276_a_at	-0.4148	Rps4x	ribosomal protein S4, X-linked	20102	ENSMUSG00000031320
1451504_at	0.3938	Chchd3	coiled-coil-helix-coiled-coil-helix domain containing 3	66075	ENSMUSG00000053768
1416349_at	0.4602	Mrpl34	mitochondrial ribosomal protein L34	94065	ENSMUSG00000034880
1450865_s_at	0.3921	Mrps24	mitochondrial ribosomal protein S24	64660	ENSMUSG00000020477
1420259_at	-0.4024	Pkp2	plakophilin 2	67451	ENSMUSG00000041957
1448869_a_at	0.5052	Mrps16	mitochondrial ribosomal protein S16	66242	ENSMUSG00000049960
1434540_a_at	0.4062	Clta	clathrin, light polypeptide (Lca)	12757	ENSMUSG00000028478
1443843_x_at	-0.4012	Rpl9	ribosomal protein L9	20005	ENSMUSG00000047215
1428153_at	0.4679	Mrps10	mitochondrial ribosomal protein S10	64657	ENSMUSG00000034729
1439662_at	-0.3976	Homer1	homer homolog 1 (Drosophila)	26556	ENSMUSG00000007617
1450054_at	-0.4064	Add1	adducin 1 (alpha)	11518	ENSMUSG00000029106
1452048_at	0.3927	Mrpl12	mitochondrial ribosomal protein L12	56282	ENSMUSG00000039640
1451164_a_at	0.5042	Mrps18b	mitochondrial ribosomal protein S18B	66973	ENSMUSG00000024436
1424367_a_at	-0.3908	Homer2	homer homolog 2 (Drosophila)	26557	ENSMUSG00000025813
1416093_a_at	0.5553	Mrpl20	mitochondrial ribosomal protein L20	66448	ENSMUSG00000029066
1426958_at	0.4026	Rps9	ribosomal protein S9	76846	ENSMUSG00000006333
1433689_s_at	0.5417	Rps9	ribosomal protein S9	76846	ENSMUSG00000006333
1450405_at	0.417	Mrpl19	mitochondrial ribosomal protein L19	56284	ENSMUSG00000030045
1417918_at	0.4001	Mrpl11	mitochondrial ribosomal protein L11	66419	ENSMUSG00000024902
1451307_at	0.4382	Mrpl14	mitochondrial ribosomal protein L14	68463	ENSMUSG00000023939
molecular function	transferase activity, transferring acyl groups other than amino-acyl groups	GO:0016747
C=130;O=9;E=2.98;R=3.02;rawP=0.0030;adjP=0.0614
Probe Set ID	R	Gene Symbol	Description	Entrez ID	Ensemble Gene Stable ID
1428336_at	0.3877	Agpat4	1-acylglycerol-3-phosphate O-acyltransferase 4 (lysophosphatidic acid acyltransferase, delta)	68262	ENSMUSG00000023827
1439314_at	-0.3973	Clock	circadian locomotor output cycles kaput	12753	ENSMUSG00000029238
1418660_at	-0.3989	Clock	circadian locomotor output cycles kaput	12753	ENSMUSG00000029238
1436702_at	0.3879	Nat8l	N-acetyltransferase 8-like	269642	ENSMUSG00000048142
1423158_at	0.3981	Gnpnat1	glucosamine-phosphate N-acetyltransferase 1	54342	ENSMUSG00000037722
1450776_at	0.4358	Agpat6	1-acylglycerol-3-phosphate O-acyltransferase 6 (lysophosphatidic acid acyltransferase, zeta)	102247	ENSMUSG00000031545
1455061_a_at	0.4767	Acaa2	acetyl-Coenzyme A acyltransferase 2 (mitochondrial 3-oxoacyl-Coenzyme A thiolase)	52538	ENSMUSG00000036880
1452173_at	0.4082	Hadha	hydroxyacyl-Coenzyme A dehydrogenase/3-ketoacyl-Coenzyme A thiolase/enoyl-Coenzyme A hydratase (trifunctional protein), alpha subunit	97212	ENSMUSG00000025745
1417780_at	0.4193	Lass4	LAG1 homolog, ceramide synthase 4	67260	ENSMUSG00000008206
1433818_at	0.4167	Agpat3	1-acylglycerol-3-phosphate O-acyltransferase 3	28169	ENSMUSG00000001211
molecular function	unfolded protein binding	GO:0051082
C=81;O=7;E=1.85;R=3.77;rawP=0.0025;adjP=0.0614
Probe Set ID	R	Gene Symbol	Description	Entrez ID	Ensemble Gene Stable ID
1429776_a_at	0.4103	Dnajb6	DnaJ (Hsp40) homolog, subfamily B, member 6	23950	ENSMUSG00000029131
1456170_x_at	-0.3981	Calr	calreticulin	12317	ENSMUSG00000003814
1417606_a_at	-0.4667	Calr	calreticulin	12317	ENSMUSG00000003814
1415744_at	0.4057	H2-Ke2	H2-K region expressed gene 2	14976	ENSMUSG00000024309
1423128_at	0.4028	Aip	aryl-hydrocarbon receptor-interacting protein	11632	ENSMUSG00000024847
1436180_at	-0.4146	Dnajc5	DnaJ (Hsp40) homolog, subfamily C, member 5	13002	ENSMUSG00000000826
1423553_at	0.4566	Dnajb3	DnaJ (Hsp40) homolog, subfamily B, member 3	15504	ENSMUSG00000081984
1433535_x_at	-0.4613	Cct2	chaperonin containing Tcp1, subunit 2 (beta)	12461	ENSMUSG00000034024
molecular function	NEDD8 ligase activity	GO:0019788
C=4;O=2;E=0.09;R=21.84;rawP=0.0030;adjP=0.0614
Probe Set ID	R	Gene Symbol	Description	Entrez ID	Ensemble Gene Stable ID
1448387_at	0.3943	Rbx1	ring-box 1	56438	ENSMUSG00000022400
1426414_a_at	0.4052	Rnf7	ring finger protein 7	19823	ENSMUSG00000051234
molecular function	cysteine-type endopeptidase activator activity involved in apoptotic process	GO:0008656
C=11;O=3;E=0.25;R=11.91;rawP=0.0017;adjP=0.0614
Probe Set ID	R	Gene Symbol	Description	Entrez ID	Ensemble Gene Stable ID
1418377_a_at	0.4532	Siva1	SIVA1, apoptosis-inducing factor	30954	ENSMUSG00000064326
1416583_at	0.4059	Bad	BCL2-associated agonist of cell death	12015	ENSMUSG00000024959
1421340_at	0.3906	Map3k5	mitogen-activated protein kinase kinase kinase 5	26408	ENSMUSG00000071369
cellular component	cytoplasmic part	GO:0044444
C=5198;O=189;E=116.40;R=1.62;rawP=2.97e-15;adjP=3.70e-13
Probe Set ID	R	Gene Symbol	Description	Entrez ID	Ensemble Gene Stable ID
1419536_a_at	0.3952	Rela	v-rel reticuloendotheliosis viral oncogene homolog A (avian)	19697	ENSMUSG00000024927
1438991_x_at	-0.3968	Ppp2r1a	protein phosphatase 2 (formerly 2A), regulatory subunit A (PR 65), alpha isoform	51792	ENSMUSG00000007564
1438383_x_at	-0.4141	Ppp2r1a	protein phosphatase 2 (formerly 2A), regulatory subunit A (PR 65), alpha isoform	51792	ENSMUSG00000007564
1421949_a_at	0.3851	Ccdc123	coiled-coil domain containing 123	72140	ENSMUSG00000023072
1448524_s_at	0.5505	Ssr4	signal sequence receptor, delta	20832	ENSMUSG00000002014
1448003_at	0.4784	1810043H04Rik	RIKEN cDNA 1810043H04 gene	208501	ENSMUSG00000078572
1451088_a_at	0.4332	Oxa1l	oxidase assembly 1-like	69089	ENSMUSG00000000959
1456170_x_at	-0.3981	Calr	calreticulin	12317	ENSMUSG00000003814
1417606_a_at	-0.4667	Calr	calreticulin	12317	ENSMUSG00000003814
1430634_a_at	0.4225	Pfkp	phosphofructokinase, platelet	56421	ENSMUSG00000021196
1451746_a_at	0.4145	Atg12	autophagy related 12	67526	ENSMUSG00000032905
1417999_at	-0.4163	Itm2b	integral membrane protein 2B	16432	ENSMUSG00000022108
1433520_at	-0.4331	Scap	SREBF chaperone	235623	ENSMUSG00000032485
1434370_s_at	0.3945	Faf1	Fas-associated factor 1	14084	ENSMUSG00000010517
1417287_at	0.4165	H13	histocompatibility 13	14950	ENSMUSG00000019188
1450405_at	0.417	Mrpl19	mitochondrial ribosomal protein L19	56284	ENSMUSG00000030045
1417918_at	0.4001	Mrpl11	mitochondrial ribosomal protein L11	66419	ENSMUSG00000024902
1448286_at	0.4051	Hsd17b10	hydroxysteroid (17-beta) dehydrogenase 10	15108	ENSMUSG00000025260
1453564_a_at	0.3954	Chmp3	charged multivesicular body protein 3	66700	ENSMUSG00000053119
1416332_at	0.4426	Cirbp	cold inducible RNA binding protein	12696	ENSMUSG00000045193
1415885_at	-0.3864	Chgb	chromogranin B	12653	ENSMUSG00000027350
1423814_at	0.4275	Ddx41	DEAD (Asp-Glu-Ala-Asp) box polypeptide 41	72935	ENSMUSG00000021494
1433834_at	-0.4043	2015-03-06	membrane-associated ring finger (C3HC4) 6	223455	ENSMUSG00000039100
1427282_a_at	0.3939	Fxn	frataxin	14297	ENSMUSG00000059363
1419420_at	-0.4827	St6galnac5	ST6 (alpha-N-acetyl-neuraminyl-2,3-beta-galactosyl-1,3)-N-acetylgalactosaminide alpha-2,6-sialyltransferase 5	26938	ENSMUSG00000039037
1416831_at	0.4436	Neu1	neuraminidase 1	18010	ENSMUSG00000007038
1429110_a_at	0.3935	Nsun4	NOL1/NOP2/Sun domain family, member 4	72181	ENSMUSG00000028706
1450776_at	0.4358	Agpat6	1-acylglycerol-3-phosphate O-acyltransferase 6 (lysophosphatidic acid acyltransferase, zeta)	102247	ENSMUSG00000031545
1432489_a_at	0.4544	Wdyhv1	WDYHV motif containing 1	76773	ENSMUSG00000022359
1433535_x_at	-0.4613	Cct2	chaperonin containing Tcp1, subunit 2 (beta)	12461	ENSMUSG00000034024
1448427_at	0.4803	Ndufa6	NADH dehydrogenase (ubiquinone) 1 alpha subcomplex, 6 (B14)	67130	ENSMUSG00000022450
1434540_a_at	0.4062	Clta	clathrin, light polypeptide (Lca)	12757	ENSMUSG00000028478
1448292_at	0.4089	Uqcr11	ubiquinol-cytochrome c reductase, complex III subunit XI	66594	ENSMUSG00000020163
1424164_at	0.4969	Mrpl50	mitochondrial ribosomal protein L50	28028	ENSMUSG00000044018
1418016_at	-0.473	Pum2	pumilio 2 (Drosophila)	80913	ENSMUSG00000020594
1422480_at	-0.4214	Snx3	sorting nexin 3	54198	ENSMUSG00000019804
1417780_at	0.4193	Lass4	LAG1 homolog, ceramide synthase 4	67260	ENSMUSG00000008206
1423158_at	0.3981	Gnpnat1	glucosamine-phosphate N-acetyltransferase 1	54342	ENSMUSG00000037722
1428380_at	0.5038	Atraid	all-trans retinoic acid induced differentiation factor	381629	ENSMUSG00000013622
1423223_a_at	0.4657	Prdx6	peroxiredoxin 6	11758	ENSMUSG00000026701
1417868_a_at	0.5132	Ctsz	cathepsin Z	64138	ENSMUSG00000016256
1417870_x_at	0.4574	Ctsz	cathepsin Z	64138	ENSMUSG00000016256
1422432_at	0.5004	Dbi	diazepam binding inhibitor	13167	ENSMUSG00000026385
1416023_at	0.4447	Fabp3	fatty acid binding protein 3, muscle and heart	14077	ENSMUSG00000028773
1423128_at	0.4028	Aip	aryl-hydrocarbon receptor-interacting protein	11632	ENSMUSG00000024847
1452251_at	-0.4198	Nbea	neurobeachin	26422	ENSMUSG00000027799
1451412_a_at	0.4325	Ift20	intraflagellar transport 20	55978	ENSMUSG00000001105
1416834_x_at	0.4474	Ndufb2	NADH dehydrogenase (ubiquinone) 1 beta subcomplex, 2	68198	ENSMUSG00000002416
1448483_a_at	0.3949	Ndufb2	NADH dehydrogenase (ubiquinone) 1 beta subcomplex, 2	68198	ENSMUSG00000002416
1417064_at	0.4655	Jagn1	jagunal homolog 1 (Drosophila)	67767	ENSMUSG00000051256
1416615_at	0.5067	Clpp	ClpP caseinolytic peptidase, ATP-dependent, proteolytic subunit	53895	ENSMUSG00000002660
1416337_at	0.3959	Uqcrb	ubiquinol-cytochrome c reductase binding protein	67530	ENSMUSG00000021520
1425507_at	0.4115	Arfrp1	ADP-ribosylation factor related protein 1	76688	ENSMUSG00000038671
1456196_x_at	-0.4117	Fkbp1a	FK506 binding protein 1a	14225	ENSMUSG00000032966
1438958_x_at	-0.4292	Fkbp1a	FK506 binding protein 1a	14225	ENSMUSG00000032966
1422623_x_at	0.3922	Rpl41	ribosomal protein L41	67945	ENSMUSG00000093674
1448887_x_at	0.4983	Fxc1	fractured callus expressed transcript 1	14356	ENSMUSG00000089847
1436416_x_at	0.5577	Fxc1	fractured callus expressed transcript 1	14356	ENSMUSG00000089847
1417916_a_at	0.6189	Fxc1	fractured callus expressed transcript 1	14356	ENSMUSG00000089847
1416349_at	0.4602	Mrpl34	mitochondrial ribosomal protein L34	94065	ENSMUSG00000034880
1450865_s_at	0.3921	Mrps24	mitochondrial ribosomal protein S24	64660	ENSMUSG00000020477
1439662_at	-0.3976	Homer1	homer homolog 1 (Drosophila)	26556	ENSMUSG00000007617
1450054_at	-0.4064	Add1	adducin 1 (alpha)	11518	ENSMUSG00000029106
1419249_at	-0.4093	Cdk14	cyclin-dependent kinase 14	18647	ENSMUSG00000028926
1427735_a_at	0.3964	Acta1	actin, alpha 1, skeletal muscle	11459	ENSMUSG00000031972
1452048_at	0.3927	Mrpl12	mitochondrial ribosomal protein L12	56282	ENSMUSG00000039640
1430990_s_at	0.4864	Mrpl44	mitochondrial ribosomal protein L44	69163	ENSMUSG00000026248
1433984_a_at	-0.4061	Mdh2	malate dehydrogenase 2, NAD (mitochondrial)	17448	ENSMUSG00000019179
1424646_at	0.4468	Uckl1	uridine-cytidine kinase 1-like 1	68556	ENSMUSG00000089917
1431105_a_at	0.429	Tmem33	transmembrane protein 33	67878	ENSMUSG00000037720
1457032_at	-0.4205	Ak5	adenylate kinase 5	229949	ENSMUSG00000039058
1433878_at	0.5015	Mrps26	mitochondrial ribosomal protein S26	99045	ENSMUSG00000037740
1427548_a_at	0.4552	Clns1a	chloride channel, nucleotide-sensitive, 1A	12729	ENSMUSG00000025439
1455006_at	0.5302	2310016M24Rik	RIKEN cDNA 2310016M24 gene	66379	ENSMUSG00000023020
1417067_s_at	-0.3924	Adck3	aarF domain containing kinase 3	67426	ENSMUSG00000026489
1423170_at	0.4031	Taf7	TAF7 RNA polymerase II, TATA box binding protein (TBP)-associated factor	24074	ENSMUSG00000051316
1416386_a_at	0.4458	M6pr	mannose-6-phosphate receptor, cation dependent	17113	ENSMUSG00000007458
1430326_s_at	0.4346	Uqcrq	ubiquinol-cytochrome c reductase, complex III subunit VII	22272	ENSMUSG00000044894
1418377_a_at	0.4532	Siva1	SIVA1, apoptosis-inducing factor	30954	ENSMUSG00000064326
1451504_at	0.3938	Chchd3	coiled-coil-helix-coiled-coil-helix domain containing 3	66075	ENSMUSG00000053768
1422579_at	0.4522	Hspe1	heat shock protein 1 (chaperonin 10)	15528	ENSMUSG00000073676
1435566_s_at	0.5501	Araf	v-raf murine sarcoma 3611 viral oncogene homolog	11836	ENSMUSG00000001127
1424364_a_at	0.4175	Uqcr10	ubiquinol-cytochrome c reductase, complex III subunit X	66152	ENSMUSG00000059534
1420473_at	-0.3869	Mtpn	myotrophin	14489	ENSMUSG00000029840
1417206_at	0.4141	Urod	uroporphyrinogen decarboxylase	22275	ENSMUSG00000028684
1427773_a_at	0.4008	Rabac1	Rab acceptor 1 (prenylated)	14470	ENSMUSG00000003380
1428469_a_at	0.3917	Dzip1	DAZ interacting protein 1	66573	ENSMUSG00000042156
1449137_at	0.4309	Pdha1	pyruvate dehydrogenase E1 alpha 1	18597	ENSMUSG00000031299
1428153_at	0.4679	Mrps10	mitochondrial ribosomal protein S10	64657	ENSMUSG00000034729
1433818_at	0.4167	Agpat3	1-acylglycerol-3-phosphate O-acyltransferase 3	28169	ENSMUSG00000001211
1428131_a_at	-0.4354	Cdc42se1	CDC42 small effector 1	57912	ENSMUSG00000046722
1421051_s_at	0.5256	Vps25	vacuolar protein sorting 25 (yeast)	28084	ENSMUSG00000078656
1423077_at	0.3929	Snx9	sorting nexin 9	66616	NULL
1423255_at	0.4991	Atp6v1g1	ATPase, H+ transporting, lysosomal V1 subunit G1	66290	ENSMUSG00000039105
1419382_a_at	0.4213	Dhrs4	dehydrogenase/reductase (SDR family) member 4	28200	ENSMUSG00000022210
1416904_at	-0.4231	Mbnl1	muscleblind-like 1 (Drosophila)	56758	ENSMUSG00000027763
1427552_a_at	1	Gstz1	glutathione transferase zeta 1 (maleylacetoacetate isomerase)	14874	ENSMUSG00000021033
1416789_at	0.4437	Idh3g	isocitrate dehydrogenase 3 (NAD+), gamma	15929	ENSMUSG00000002010
1420876_a_at	0.4433	2015-09-06	septin 6	56526	ENSMUSG00000050379
1449147_at	-0.3849	Chst1	carbohydrate (keratan sulfate Gal-6) sulfotransferase 1	76969	ENSMUSG00000027221
1416276_a_at	-0.4148	Rps4x	ribosomal protein S4, X-linked	20102	ENSMUSG00000031320
1451312_at	0.5365	Ndufs7	NADH dehydrogenase (ubiquinone) Fe-S protein 7	75406	ENSMUSG00000020153
1448853_at	-0.5083	Synj2bp	synaptojanin 2 binding protein	24071	ENSMUSG00000090935
1415729_at	-0.4129	Pdpk1	3-phosphoinositide dependent protein kinase 1	18607	ENSMUSG00000024122
1436702_at	0.3879	Nat8l	N-acetyltransferase 8-like	269642	ENSMUSG00000048142
1431645_a_at	0.4196	Gdi2	guanosine diphosphate (GDP) dissociation inhibitor 2	14569	NULL
1449116_a_at	0.4376	Dtymk	deoxythymidylate kinase	21915	ENSMUSG00000026281
1448869_a_at	0.5052	Mrps16	mitochondrial ribosomal protein S16	66242	ENSMUSG00000049960
1450969_at	0.3941	Pccb	propionyl Coenzyme A carboxylase, beta polypeptide	66904	ENSMUSG00000032527
1421340_at	0.3906	Map3k5	mitogen-activated protein kinase kinase kinase 5	26408	ENSMUSG00000071369
1436342_a_at	0.4494	Ubxn1	UBX domain protein 1	225896	ENSMUSG00000071655
1418986_a_at	0.4208	Uxt	ubiquitously expressed transcript	22294	ENSMUSG00000001134
1422549_at	0.4532	Arl2	ADP-ribosylation factor-like 2	56327	ENSMUSG00000024944
1423993_at	0.3993	Atp6v1f	ATPase, H+ transporting, lysosomal V1 subunit F	66144	ENSMUSG00000004285
1436709_at	0.427	Emc1	ER membrane protein complex subunit 1	230866	ENSMUSG00000078517
1428214_at	0.4394	Tomm7	translocase of outer mitochondrial membrane 7 homolog (yeast)	66169	ENSMUSG00000028998
1429778_at	0.4421	Optn	optineurin	71648	ENSMUSG00000026672
1451307_at	0.4382	Mrpl14	mitochondrial ribosomal protein L14	68463	ENSMUSG00000023939
1422531_at	0.3913	Syt5	synaptotagmin V	53420	ENSMUSG00000004961
1416837_at	0.4039	Bax	BCL2-associated X protein	12028	ENSMUSG00000003873
1451665_a_at	0.4907	Ap4s1	adaptor-related protein complex AP-4, sigma 1	11782	ENSMUSG00000020955
1416459_at	0.4546	Arf2	ADP-ribosylation factor 2	11841	ENSMUSG00000062421
1429708_at	0.4179	Ndufa11	NADH dehydrogenase (ubiquinone) 1 alpha subcomplex 11	69875	ENSMUSG00000002379
1416367_at	0.4954	1110001J03Rik	RIKEN cDNA 1110001J03 gene	66117	ENSMUSG00000019689
1431962_a_at	0.4724	Stambp	STAM binding protein	70527	ENSMUSG00000006906
1416317_a_at	0.4315	Stambp	STAM binding protein	70527	ENSMUSG00000006906
1450895_a_at	0.3889	Cox16	COX16 cytochrome c oxidase assembly homolog (S. cerevisiae)	66272	ENSMUSG00000091803
1422919_at	0.3889	Hrasls	HRAS-like suppressor	27281	ENSMUSG00000022525
1423413_at	0.4041	Ndrg1	N-myc downstream regulated gene 1	17988	ENSMUSG00000005125
1450976_at	0.4192	Ndrg1	N-myc downstream regulated gene 1	17988	ENSMUSG00000005125
1458285_at	-0.4474	Gria1	glutamate receptor, ionotropic, AMPA1 (alpha 1)	14799	ENSMUSG00000020524
1448274_at	0.405	C1qbp	complement component 1, q subcomponent binding protein	12261	ENSMUSG00000018446
1428964_at	0.4281	Slc25a18	solute carrier family 25 (mitochondrial carrier), member 18	71803	ENSMUSG00000004902
1416245_at	0.4012	Aurkaip1	aurora kinase A interacting protein 1	66077	ENSMUSG00000065990
1424732_s_at	0.5224	Tmem192	transmembrane protein 192	73067	ENSMUSG00000025521
1447909_s_at	0.4421	Selk	selenoprotein K	80795	ENSMUSG00000042682
1423225_at	0.4004	Selk	selenoprotein K	80795	ENSMUSG00000042682
1435074_at	-0.4147	Tmem106b	transmembrane protein 106B	71900	ENSMUSG00000029571
1456867_x_at	0.4073	Ergic3	ERGIC and golgi 3	66366	ENSMUSG00000005881
1423548_s_at	0.4287	Ergic3	ERGIC and golgi 3	66366	ENSMUSG00000005881
1448154_at	0.4399	Ndrg2	N-myc downstream regulated gene 2	29811	ENSMUSG00000004558
1454892_at	-0.4159	Pitpnb	phosphatidylinositol transfer protein, beta	56305	ENSMUSG00000050017
1434257_s_at	-0.4175	Pitpnb	phosphatidylinositol transfer protein, beta	56305	ENSMUSG00000050017
1423840_at	0.4437	Coa3	cytochrome C oxidase assembly factor 3	52469	ENSMUSG00000017188
1448699_at	0.4656	Mrpl54	mitochondrial ribosomal protein L54	66047	ENSMUSG00000034932
1457600_x_at	-0.3932	Nkd2	naked cuticle 2 homolog (Drosophila)	72293	ENSMUSG00000021567
1416593_at	0.4554	Glrx	glutaredoxin	93692	ENSMUSG00000021591
1456243_x_at	-0.4024	Mcl1	myeloid cell leukemia sequence 1	17210	ENSMUSG00000038612
1437527_x_at	-0.4303	Mcl1	myeloid cell leukemia sequence 1	17210	ENSMUSG00000038612
1416583_at	0.4059	Bad	BCL2-associated agonist of cell death	12015	ENSMUSG00000024959
1422449_s_at	0.391	Rcn2	reticulocalbin 2	26611	ENSMUSG00000032320
1421970_a_at	-0.4056	Gria2	glutamate receptor, ionotropic, AMPA2 (alpha 2)	14800	ENSMUSG00000033981
1451650_at	0.4141	Ddo	D-aspartate oxidase	70503	ENSMUSG00000063428
1416994_at	0.5115	Ttc1	tetratricopeptide repeat domain 1	66827	ENSMUSG00000041278
1426187_a_at	0.4107	Hax1	HCLS1 associated X-1	23897	ENSMUSG00000027944
1448677_at	0.4366	Emc8	ER membrane protein complex subunit 8	18117	ENSMUSG00000031819
1417421_at	0.4717	S100a1	S100 calcium binding protein A1	20193	ENSMUSG00000044080
1416951_a_at	-0.4038	Atp6v1d	ATPase, H+ transporting, lysosomal V1 subunit D	73834	ENSMUSG00000021114
1423544_at	0.3861	Ptpn5	protein tyrosine phosphatase, non-receptor type 5	19259	ENSMUSG00000030854
1422976_x_at	0.4927	Ndufa7	NADH dehydrogenase (ubiquinone) 1 alpha subcomplex, 7 (B14.5a)	66416	ENSMUSG00000041881
1455749_x_at	0.4688	Ndufa7	NADH dehydrogenase (ubiquinone) 1 alpha subcomplex, 7 (B14.5a)	66416	ENSMUSG00000041881
1428360_x_at	0.527	Ndufa7	NADH dehydrogenase (ubiquinone) 1 alpha subcomplex, 7 (B14.5a)	66416	ENSMUSG00000041881
1450818_a_at	0.4138	Ndufa7	NADH dehydrogenase (ubiquinone) 1 alpha subcomplex, 7 (B14.5a)	66416	ENSMUSG00000041881
1436567_a_at	0.5276	Ndufa7	NADH dehydrogenase (ubiquinone) 1 alpha subcomplex, 7 (B14.5a)	66416	ENSMUSG00000041881
1449025_at	0.3849	Ifit3	interferon-induced protein with tetratricopeptide repeats 3	15959	ENSMUSG00000074896
1418002_at	0.479	Higd2a	HIG1 domain family, member 2A	67044	ENSMUSG00000025868
1416849_at	0.4703	Cisd1	CDGSH iron sulfur domain 1	52637	ENSMUSG00000037710
1415744_at	0.4057	H2-Ke2	H2-K region expressed gene 2	14976	ENSMUSG00000024309
1419428_a_at	0.4187	Gaa	glucosidase, alpha, acid	14387	ENSMUSG00000025579
1455061_a_at	0.4767	Acaa2	acetyl-Coenzyme A acyltransferase 2 (mitochondrial 3-oxoacyl-Coenzyme A thiolase)	52538	ENSMUSG00000036880
1416766_at	0.3961	Mosc2	MOCO sulphurase C-terminal domain containing 2	67247	ENSMUSG00000073481
1442549_at	-0.4167	Mbnl3	muscleblind-like 3 (Drosophila)	171170	ENSMUSG00000036109
1429776_a_at	0.4103	Dnajb6	DnaJ (Hsp40) homolog, subfamily B, member 6	23950	ENSMUSG00000029131
1416093_a_at	0.5553	Mrpl20	mitochondrial ribosomal protein L20	66448	ENSMUSG00000029066
1452874_at	-0.4189	2510003E04Rik	RIKEN cDNA 2510003E04 gene	72320	ENSMUSG00000036955
1417593_at	0.4398	Tusc2	tumor suppressor candidate 2	80385	ENSMUSG00000010054
1429709_at	0.3934	Pmpcb	peptidase (mitochondrial processing) beta	73078	ENSMUSG00000029017
1426958_at	0.4026	Rps9	ribosomal protein S9	76846	ENSMUSG00000006333
1433689_s_at	0.5417	Rps9	ribosomal protein S9	76846	ENSMUSG00000006333
1422694_at	0.4001	Ttyh1	tweety homolog 1 (Drosophila)	57776	ENSMUSG00000030428
1450048_a_at	0.4154	Idh2	isocitrate dehydrogenase 2 (NADP+), mitochondrial	269951	ENSMUSG00000030541
1455713_x_at	-0.4264	Phb2	prohibitin 2	12034	ENSMUSG00000004264
1445440_at	-0.4	Ccdc88a	coiled coil domain containing 88A	108686	ENSMUSG00000032740
1451377_a_at	0.4174	Aaas	achalasia, adrenocortical insufficiency, alacrimia	223921	ENSMUSG00000036678
1422491_a_at	0.4349	Bnip2	BCL2/adenovirus E1B interacting protein 2	12175	ENSMUSG00000011958
1453993_a_at	0.487	Bnip2	BCL2/adenovirus E1B interacting protein 2	12175	ENSMUSG00000011958
1437909_at	0.4128	Srcap	Snf2-related CREBBP activator protein	100043597	NULL
1418185_at	0.5046	Ndufaf3	NADH dehydrogenase (ubiquinone) 1 alpha subcomplex, assembly factor 3	66706	ENSMUSG00000070283
1418228_at	0.4644	Nfu1	NFU1 iron-sulfur cluster scaffold homolog (S. cerevisiae)	56748	ENSMUSG00000029993
1416220_at	0.4053	Spcs1	signal peptidase complex subunit 1 homolog (S. cerevisiae)	69019	ENSMUSG00000021917
1460181_at	0.3966	Stmn3	stathmin-like 3	20262	ENSMUSG00000027581
1416764_at	0.4158	Fis1	fission 1 (mitochondrial outer membrane) homolog (yeast)	66437	ENSMUSG00000019054
1448387_at	0.3943	Rbx1	ring-box 1	56438	ENSMUSG00000022400
1443843_x_at	-0.4012	Rpl9	ribosomal protein L9	20005	ENSMUSG00000047215
1433915_s_at	-0.463	Epn2	epsin 2	13855	ENSMUSG00000001036
1415677_at	0.3874	Dhrs1	dehydrogenase/reductase (SDR family) member 1	52585	ENSMUSG00000002332
1451164_a_at	0.5042	Mrps18b	mitochondrial ribosomal protein S18B	66973	ENSMUSG00000024436
1448718_at	0.4361	Lamtor1	late endosomal/lysosomal adaptor, MAPK and MTOR activator 1	66508	ENSMUSG00000030842
1451269_at	0.3896	Pdzd11	PDZ domain containing 11	72621	ENSMUSG00000015668
1427921_s_at	0.4227	2310061C15Rik	RIKEN cDNA 2310061C15 gene	66531	ENSMUSG00000014633
1437331_a_at	-0.4151	Arf3	ADP-ribosylation factor 3	11842	ENSMUSG00000051853
1422879_at	0.409	Sypl	synaptophysin-like protein	19027	ENSMUSG00000020570
1448905_at	0.4337	Nme3	NME/NM23 nucleoside diphosphate kinase 3	79059	ENSMUSG00000073435
1452341_at	0.433	Echs1	enoyl Coenzyme A hydratase, short chain, 1, mitochondrial	93747	ENSMUSG00000025465
1452026_a_at	0.4353	Pla2g12a	phospholipase A2, group XIIA	66350	ENSMUSG00000027999
1421872_at	0.4076	Rab24	RAB24, member RAS oncogene family	19336	ENSMUSG00000034789
1421873_s_at	0.4295	Rab24	RAB24, member RAS oncogene family	19336	ENSMUSG00000034789
1452173_at	0.4082	Hadha	hydroxyacyl-Coenzyme A dehydrogenase/3-ketoacyl-Coenzyme A thiolase/enoyl-Coenzyme A hydratase (trifunctional protein), alpha subunit	97212	ENSMUSG00000025745
1436180_at	-0.4146	Dnajc5	DnaJ (Hsp40) homolog, subfamily C, member 5	13002	ENSMUSG00000000826
cellular component	mitochondrion	GO:0005739
C=1480;O=83;E=33.14;R=2.50;rawP=2.43e-15;adjP=3.70e-13
Probe Set ID	R	Gene Symbol	Description	Entrez ID	Ensemble Gene Stable ID
1448853_at	-0.5083	Synj2bp	synaptojanin 2 binding protein	24071	ENSMUSG00000090935
1451312_at	0.5365	Ndufs7	NADH dehydrogenase (ubiquinone) Fe-S protein 7	75406	ENSMUSG00000020153
1436702_at	0.3879	Nat8l	N-acetyltransferase 8-like	269642	ENSMUSG00000048142
1449116_a_at	0.4376	Dtymk	deoxythymidylate kinase	21915	ENSMUSG00000026281
1448003_at	0.4784	1810043H04Rik	RIKEN cDNA 1810043H04 gene	208501	ENSMUSG00000078572
1451088_a_at	0.4332	Oxa1l	oxidase assembly 1-like	69089	ENSMUSG00000000959
1448869_a_at	0.5052	Mrps16	mitochondrial ribosomal protein S16	66242	ENSMUSG00000049960
1450969_at	0.3941	Pccb	propionyl Coenzyme A carboxylase, beta polypeptide	66904	ENSMUSG00000032527
1422549_at	0.4532	Arl2	ADP-ribosylation factor-like 2	56327	ENSMUSG00000024944
1450405_at	0.417	Mrpl19	mitochondrial ribosomal protein L19	56284	ENSMUSG00000030045
1417918_at	0.4001	Mrpl11	mitochondrial ribosomal protein L11	66419	ENSMUSG00000024902
1448286_at	0.4051	Hsd17b10	hydroxysteroid (17-beta) dehydrogenase 10	15108	ENSMUSG00000025260
1428214_at	0.4394	Tomm7	translocase of outer mitochondrial membrane 7 homolog (yeast)	66169	ENSMUSG00000028998
1451307_at	0.4382	Mrpl14	mitochondrial ribosomal protein L14	68463	ENSMUSG00000023939
1416837_at	0.4039	Bax	BCL2-associated X protein	12028	ENSMUSG00000003873
1429708_at	0.4179	Ndufa11	NADH dehydrogenase (ubiquinone) 1 alpha subcomplex 11	69875	ENSMUSG00000002379
1416367_at	0.4954	1110001J03Rik	RIKEN cDNA 1110001J03 gene	66117	ENSMUSG00000019689
1450895_a_at	0.3889	Cox16	COX16 cytochrome c oxidase assembly homolog (S. cerevisiae)	66272	ENSMUSG00000091803
1427282_a_at	0.3939	Fxn	frataxin	14297	ENSMUSG00000059363
1429110_a_at	0.3935	Nsun4	NOL1/NOP2/Sun domain family, member 4	72181	ENSMUSG00000028706
1448427_at	0.4803	Ndufa6	NADH dehydrogenase (ubiquinone) 1 alpha subcomplex, 6 (B14)	67130	ENSMUSG00000022450
1448292_at	0.4089	Uqcr11	ubiquinol-cytochrome c reductase, complex III subunit XI	66594	ENSMUSG00000020163
1424164_at	0.4969	Mrpl50	mitochondrial ribosomal protein L50	28028	ENSMUSG00000044018
1448274_at	0.405	C1qbp	complement component 1, q subcomponent binding protein	12261	ENSMUSG00000018446
1428964_at	0.4281	Slc25a18	solute carrier family 25 (mitochondrial carrier), member 18	71803	ENSMUSG00000004902
1416245_at	0.4012	Aurkaip1	aurora kinase A interacting protein 1	66077	ENSMUSG00000065990
1423223_a_at	0.4657	Prdx6	peroxiredoxin 6	11758	ENSMUSG00000026701
1423840_at	0.4437	Coa3	cytochrome C oxidase assembly factor 3	52469	ENSMUSG00000017188
1448699_at	0.4656	Mrpl54	mitochondrial ribosomal protein L54	66047	ENSMUSG00000034932
1422432_at	0.5004	Dbi	diazepam binding inhibitor	13167	ENSMUSG00000026385
1416023_at	0.4447	Fabp3	fatty acid binding protein 3, muscle and heart	14077	ENSMUSG00000028773
1416593_at	0.4554	Glrx	glutaredoxin	93692	ENSMUSG00000021591
1456243_x_at	-0.4024	Mcl1	myeloid cell leukemia sequence 1	17210	ENSMUSG00000038612
1437527_x_at	-0.4303	Mcl1	myeloid cell leukemia sequence 1	17210	ENSMUSG00000038612
1416583_at	0.4059	Bad	BCL2-associated agonist of cell death	12015	ENSMUSG00000024959
1426187_a_at	0.4107	Hax1	HCLS1 associated X-1	23897	ENSMUSG00000027944
1448677_at	0.4366	Emc8	ER membrane protein complex subunit 8	18117	ENSMUSG00000031819
1416834_x_at	0.4474	Ndufb2	NADH dehydrogenase (ubiquinone) 1 beta subcomplex, 2	68198	ENSMUSG00000002416
1448483_a_at	0.3949	Ndufb2	NADH dehydrogenase (ubiquinone) 1 beta subcomplex, 2	68198	ENSMUSG00000002416
1416615_at	0.5067	Clpp	ClpP caseinolytic peptidase, ATP-dependent, proteolytic subunit	53895	ENSMUSG00000002660
1416337_at	0.3959	Uqcrb	ubiquinol-cytochrome c reductase binding protein	67530	ENSMUSG00000021520
1422976_x_at	0.4927	Ndufa7	NADH dehydrogenase (ubiquinone) 1 alpha subcomplex, 7 (B14.5a)	66416	ENSMUSG00000041881
1455749_x_at	0.4688	Ndufa7	NADH dehydrogenase (ubiquinone) 1 alpha subcomplex, 7 (B14.5a)	66416	ENSMUSG00000041881
1428360_x_at	0.527	Ndufa7	NADH dehydrogenase (ubiquinone) 1 alpha subcomplex, 7 (B14.5a)	66416	ENSMUSG00000041881
1450818_a_at	0.4138	Ndufa7	NADH dehydrogenase (ubiquinone) 1 alpha subcomplex, 7 (B14.5a)	66416	ENSMUSG00000041881
1436567_a_at	0.5276	Ndufa7	NADH dehydrogenase (ubiquinone) 1 alpha subcomplex, 7 (B14.5a)	66416	ENSMUSG00000041881
1448887_x_at	0.4983	Fxc1	fractured callus expressed transcript 1	14356	ENSMUSG00000089847
1436416_x_at	0.5577	Fxc1	fractured callus expressed transcript 1	14356	ENSMUSG00000089847
1417916_a_at	0.6189	Fxc1	fractured callus expressed transcript 1	14356	ENSMUSG00000089847
1449025_at	0.3849	Ifit3	interferon-induced protein with tetratricopeptide repeats 3	15959	ENSMUSG00000074896
1418002_at	0.479	Higd2a	HIG1 domain family, member 2A	67044	ENSMUSG00000025868
1450865_s_at	0.3921	Mrps24	mitochondrial ribosomal protein S24	64660	ENSMUSG00000020477
1416349_at	0.4602	Mrpl34	mitochondrial ribosomal protein L34	94065	ENSMUSG00000034880
1416849_at	0.4703	Cisd1	CDGSH iron sulfur domain 1	52637	ENSMUSG00000037710
1455061_a_at	0.4767	Acaa2	acetyl-Coenzyme A acyltransferase 2 (mitochondrial 3-oxoacyl-Coenzyme A thiolase)	52538	ENSMUSG00000036880
1416766_at	0.3961	Mosc2	MOCO sulphurase C-terminal domain containing 2	67247	ENSMUSG00000073481
1452048_at	0.3927	Mrpl12	mitochondrial ribosomal protein L12	56282	ENSMUSG00000039640
1416093_a_at	0.5553	Mrpl20	mitochondrial ribosomal protein L20	66448	ENSMUSG00000029066
1430990_s_at	0.4864	Mrpl44	mitochondrial ribosomal protein L44	69163	ENSMUSG00000026248
1452874_at	-0.4189	2510003E04Rik	RIKEN cDNA 2510003E04 gene	72320	ENSMUSG00000036955
1433984_a_at	-0.4061	Mdh2	malate dehydrogenase 2, NAD (mitochondrial)	17448	ENSMUSG00000019179
1417593_at	0.4398	Tusc2	tumor suppressor candidate 2	80385	ENSMUSG00000010054
1429709_at	0.3934	Pmpcb	peptidase (mitochondrial processing) beta	73078	ENSMUSG00000029017
1450048_a_at	0.4154	Idh2	isocitrate dehydrogenase 2 (NADP+), mitochondrial	269951	ENSMUSG00000030541
1455713_x_at	-0.4264	Phb2	prohibitin 2	12034	ENSMUSG00000004264
1433878_at	0.5015	Mrps26	mitochondrial ribosomal protein S26	99045	ENSMUSG00000037740
1455006_at	0.5302	2310016M24Rik	RIKEN cDNA 2310016M24 gene	66379	ENSMUSG00000023020
1417067_s_at	-0.3924	Adck3	aarF domain containing kinase 3	67426	ENSMUSG00000026489
1418185_at	0.5046	Ndufaf3	NADH dehydrogenase (ubiquinone) 1 alpha subcomplex, assembly factor 3	66706	ENSMUSG00000070283
1418377_a_at	0.4532	Siva1	SIVA1, apoptosis-inducing factor	30954	ENSMUSG00000064326
1430326_s_at	0.4346	Uqcrq	ubiquinol-cytochrome c reductase, complex III subunit VII	22272	ENSMUSG00000044894
1451504_at	0.3938	Chchd3	coiled-coil-helix-coiled-coil-helix domain containing 3	66075	ENSMUSG00000053768
1422579_at	0.4522	Hspe1	heat shock protein 1 (chaperonin 10)	15528	ENSMUSG00000073676
1435566_s_at	0.5501	Araf	v-raf murine sarcoma 3611 viral oncogene homolog	11836	ENSMUSG00000001127
1424364_a_at	0.4175	Uqcr10	ubiquinol-cytochrome c reductase, complex III subunit X	66152	ENSMUSG00000059534
1418228_at	0.4644	Nfu1	NFU1 iron-sulfur cluster scaffold homolog (S. cerevisiae)	56748	ENSMUSG00000029993
1416764_at	0.4158	Fis1	fission 1 (mitochondrial outer membrane) homolog (yeast)	66437	ENSMUSG00000019054
1428153_at	0.4679	Mrps10	mitochondrial ribosomal protein S10	64657	ENSMUSG00000034729
1449137_at	0.4309	Pdha1	pyruvate dehydrogenase E1 alpha 1	18597	ENSMUSG00000031299
1415677_at	0.3874	Dhrs1	dehydrogenase/reductase (SDR family) member 1	52585	ENSMUSG00000002332
1451164_a_at	0.5042	Mrps18b	mitochondrial ribosomal protein S18B	66973	ENSMUSG00000024436
1427921_s_at	0.4227	2310061C15Rik	RIKEN cDNA 2310061C15 gene	66531	ENSMUSG00000014633
1421051_s_at	0.5256	Vps25	vacuolar protein sorting 25 (yeast)	28084	ENSMUSG00000078656
1428131_a_at	-0.4354	Cdc42se1	CDC42 small effector 1	57912	ENSMUSG00000046722
1419382_a_at	0.4213	Dhrs4	dehydrogenase/reductase (SDR family) member 4	28200	ENSMUSG00000022210
1448905_at	0.4337	Nme3	NME/NM23 nucleoside diphosphate kinase 3	79059	ENSMUSG00000073435
1452341_at	0.433	Echs1	enoyl Coenzyme A hydratase, short chain, 1, mitochondrial	93747	ENSMUSG00000025465
1421872_at	0.4076	Rab24	RAB24, member RAS oncogene family	19336	ENSMUSG00000034789
1421873_s_at	0.4295	Rab24	RAB24, member RAS oncogene family	19336	ENSMUSG00000034789
1427552_a_at	1	Gstz1	glutathione transferase zeta 1 (maleylacetoacetate isomerase)	14874	ENSMUSG00000021033
1452173_at	0.4082	Hadha	hydroxyacyl-Coenzyme A dehydrogenase/3-ketoacyl-Coenzyme A thiolase/enoyl-Coenzyme A hydratase (trifunctional protein), alpha subunit	97212	ENSMUSG00000025745
1416789_at	0.4437	Idh3g	isocitrate dehydrogenase 3 (NAD+), gamma	15929	ENSMUSG00000002010
cellular component	cytoplasm	GO:0005737
C=7828;O=247;E=175.29;R=1.41;rawP=5.55e-14;adjP=3.45e-12
Probe Set ID	R	Gene Symbol	Description	Entrez ID	Ensemble Gene Stable ID
1419536_a_at	0.3952	Rela	v-rel reticuloendotheliosis viral oncogene homolog A (avian)	19697	ENSMUSG00000024927
1438991_x_at	-0.3968	Ppp2r1a	protein phosphatase 2 (formerly 2A), regulatory subunit A (PR 65), alpha isoform	51792	ENSMUSG00000007564
1438383_x_at	-0.4141	Ppp2r1a	protein phosphatase 2 (formerly 2A), regulatory subunit A (PR 65), alpha isoform	51792	ENSMUSG00000007564
1421949_a_at	0.3851	Ccdc123	coiled-coil domain containing 123	72140	ENSMUSG00000023072
1448524_s_at	0.5505	Ssr4	signal sequence receptor, delta	20832	ENSMUSG00000002014
1448100_at	-0.4817	4833439L19Rik	RIKEN cDNA 4833439L19 gene	97820	ENSMUSG00000025871
1448003_at	0.4784	1810043H04Rik	RIKEN cDNA 1810043H04 gene	208501	ENSMUSG00000078572
1451088_a_at	0.4332	Oxa1l	oxidase assembly 1-like	69089	ENSMUSG00000000959
1456170_x_at	-0.3981	Calr	calreticulin	12317	ENSMUSG00000003814
1417606_a_at	-0.4667	Calr	calreticulin	12317	ENSMUSG00000003814
1430634_a_at	0.4225	Pfkp	phosphofructokinase, platelet	56421	ENSMUSG00000021196
1451746_a_at	0.4145	Atg12	autophagy related 12	67526	ENSMUSG00000032905
1426427_at	0.4891	Ttll1	tubulin tyrosine ligase-like 1	319953	ENSMUSG00000022442
1417999_at	-0.4163	Itm2b	integral membrane protein 2B	16432	ENSMUSG00000022108
1435991_at	-0.4158	Nr3c2	nuclear receptor subfamily 3, group C, member 2	110784	ENSMUSG00000031618
1433520_at	-0.4331	Scap	SREBF chaperone	235623	ENSMUSG00000032485
1434370_s_at	0.3945	Faf1	Fas-associated factor 1	14084	ENSMUSG00000010517
1417287_at	0.4165	H13	histocompatibility 13	14950	ENSMUSG00000019188
1450405_at	0.417	Mrpl19	mitochondrial ribosomal protein L19	56284	ENSMUSG00000030045
1417918_at	0.4001	Mrpl11	mitochondrial ribosomal protein L11	66419	ENSMUSG00000024902
1448286_at	0.4051	Hsd17b10	hydroxysteroid (17-beta) dehydrogenase 10	15108	ENSMUSG00000025260
1449107_at	0.4107	Nudt4	nudix (nucleoside diphosphate linked moiety X)-type motif 4	71207	ENSMUSG00000020029
1453564_a_at	0.3954	Chmp3	charged multivesicular body protein 3	66700	ENSMUSG00000053119
1416332_at	0.4426	Cirbp	cold inducible RNA binding protein	12696	ENSMUSG00000045193
1439161_at	-0.4957	Ppp6r3	protein phosphatase 6, regulatory subunit 3	52036	ENSMUSG00000024908
1415885_at	-0.3864	Chgb	chromogranin B	12653	ENSMUSG00000027350
1426414_a_at	0.4052	Rnf7	ring finger protein 7	19823	ENSMUSG00000051234
1424685_at	0.403	Exosc4	exosome component 4	109075	ENSMUSG00000034259
1423814_at	0.4275	Ddx41	DEAD (Asp-Glu-Ala-Asp) box polypeptide 41	72935	ENSMUSG00000021494
1433834_at	-0.4043	2015-03-06	membrane-associated ring finger (C3HC4) 6	223455	ENSMUSG00000039100
1427282_a_at	0.3939	Fxn	frataxin	14297	ENSMUSG00000059363
1419420_at	-0.4827	St6galnac5	ST6 (alpha-N-acetyl-neuraminyl-2,3-beta-galactosyl-1,3)-N-acetylgalactosaminide alpha-2,6-sialyltransferase 5	26938	ENSMUSG00000039037
1416831_at	0.4436	Neu1	neuraminidase 1	18010	ENSMUSG00000007038
1429110_a_at	0.3935	Nsun4	NOL1/NOP2/Sun domain family, member 4	72181	ENSMUSG00000028706
1454758_a_at	0.4256	Tsc22d1	TSC22 domain family, member 1	21807	ENSMUSG00000022010
1450776_at	0.4358	Agpat6	1-acylglycerol-3-phosphate O-acyltransferase 6 (lysophosphatidic acid acyltransferase, zeta)	102247	ENSMUSG00000031545
1432489_a_at	0.4544	Wdyhv1	WDYHV motif containing 1	76773	ENSMUSG00000022359
1433535_x_at	-0.4613	Cct2	chaperonin containing Tcp1, subunit 2 (beta)	12461	ENSMUSG00000034024
1448427_at	0.4803	Ndufa6	NADH dehydrogenase (ubiquinone) 1 alpha subcomplex, 6 (B14)	67130	ENSMUSG00000022450
1434540_a_at	0.4062	Clta	clathrin, light polypeptide (Lca)	12757	ENSMUSG00000028478
1448292_at	0.4089	Uqcr11	ubiquinol-cytochrome c reductase, complex III subunit XI	66594	ENSMUSG00000020163
1424164_at	0.4969	Mrpl50	mitochondrial ribosomal protein L50	28028	ENSMUSG00000044018
1418016_at	-0.473	Pum2	pumilio 2 (Drosophila)	80913	ENSMUSG00000020594
1422480_at	-0.4214	Snx3	sorting nexin 3	54198	ENSMUSG00000019804
1417780_at	0.4193	Lass4	LAG1 homolog, ceramide synthase 4	67260	ENSMUSG00000008206
1421083_x_at	0.409	Banf1	barrier to autointegration factor 1	23825	ENSMUSG00000024844
1421081_a_at	0.4055	Banf1	barrier to autointegration factor 1	23825	ENSMUSG00000024844
1423158_at	0.3981	Gnpnat1	glucosamine-phosphate N-acetyltransferase 1	54342	ENSMUSG00000037722
1425371_at	-0.4209	Polb	polymerase (DNA directed), beta	18970	ENSMUSG00000031536
1428380_at	0.5038	Atraid	all-trans retinoic acid induced differentiation factor	381629	ENSMUSG00000013622
1423223_a_at	0.4657	Prdx6	peroxiredoxin 6	11758	ENSMUSG00000026701
1417868_a_at	0.5132	Ctsz	cathepsin Z	64138	ENSMUSG00000016256
1417870_x_at	0.4574	Ctsz	cathepsin Z	64138	ENSMUSG00000016256
1422432_at	0.5004	Dbi	diazepam binding inhibitor	13167	ENSMUSG00000026385
1416023_at	0.4447	Fabp3	fatty acid binding protein 3, muscle and heart	14077	ENSMUSG00000028773
1423128_at	0.4028	Aip	aryl-hydrocarbon receptor-interacting protein	11632	ENSMUSG00000024847
1452251_at	-0.4198	Nbea	neurobeachin	26422	ENSMUSG00000027799
1451412_a_at	0.4325	Ift20	intraflagellar transport 20	55978	ENSMUSG00000001105
1416496_at	-0.4028	Mrfap1	Morf4 family associated protein 1	67568	ENSMUSG00000055302
1416834_x_at	0.4474	Ndufb2	NADH dehydrogenase (ubiquinone) 1 beta subcomplex, 2	68198	ENSMUSG00000002416
1448483_a_at	0.3949	Ndufb2	NADH dehydrogenase (ubiquinone) 1 beta subcomplex, 2	68198	ENSMUSG00000002416
1417064_at	0.4655	Jagn1	jagunal homolog 1 (Drosophila)	67767	ENSMUSG00000051256
1416615_at	0.5067	Clpp	ClpP caseinolytic peptidase, ATP-dependent, proteolytic subunit	53895	ENSMUSG00000002660
1424018_at	0.4474	Hint1	histidine triad nucleotide binding protein 1	15254	ENSMUSG00000020267
1416337_at	0.3959	Uqcrb	ubiquinol-cytochrome c reductase binding protein	67530	ENSMUSG00000021520
1439314_at	-0.3973	Clock	circadian locomotor output cycles kaput	12753	ENSMUSG00000029238
1418660_at	-0.3989	Clock	circadian locomotor output cycles kaput	12753	ENSMUSG00000029238
1428049_a_at	0.5026	Nudt16l1	nudix (nucleoside diphosphate linked moiety X)-type motif 16-like 1	66911	ENSMUSG00000022516
1425507_at	0.4115	Arfrp1	ADP-ribosylation factor related protein 1	76688	ENSMUSG00000038671
1456196_x_at	-0.4117	Fkbp1a	FK506 binding protein 1a	14225	ENSMUSG00000032966
1438958_x_at	-0.4292	Fkbp1a	FK506 binding protein 1a	14225	ENSMUSG00000032966
1422507_at	0.4578	Cstb	cystatin B	13014	ENSMUSG00000005054
1451058_at	0.4215	Mcts2	malignant T cell amplified sequence 2	66405	ENSMUSG00000042814
1422623_x_at	0.3922	Rpl41	ribosomal protein L41	67945	ENSMUSG00000093674
1448887_x_at	0.4983	Fxc1	fractured callus expressed transcript 1	14356	ENSMUSG00000089847
1436416_x_at	0.5577	Fxc1	fractured callus expressed transcript 1	14356	ENSMUSG00000089847
1417916_a_at	0.6189	Fxc1	fractured callus expressed transcript 1	14356	ENSMUSG00000089847
1439755_at	-0.5399	Sipa1l1	signal-induced proliferation-associated 1 like 1	217692	ENSMUSG00000042700
1416349_at	0.4602	Mrpl34	mitochondrial ribosomal protein L34	94065	ENSMUSG00000034880
1450865_s_at	0.3921	Mrps24	mitochondrial ribosomal protein S24	64660	ENSMUSG00000020477
1439662_at	-0.3976	Homer1	homer homolog 1 (Drosophila)	26556	ENSMUSG00000007617
1433921_s_at	0.4566	Dph3	DPH3 homolog (KTI11, S. cerevisiae)	105638	ENSMUSG00000021905
1450054_at	-0.4064	Add1	adducin 1 (alpha)	11518	ENSMUSG00000029106
1419249_at	-0.4093	Cdk14	cyclin-dependent kinase 14	18647	ENSMUSG00000028926
1427735_a_at	0.3964	Acta1	actin, alpha 1, skeletal muscle	11459	ENSMUSG00000031972
1452048_at	0.3927	Mrpl12	mitochondrial ribosomal protein L12	56282	ENSMUSG00000039640
1417103_at	0.4389	Ddt	D-dopachrome tautomerase	13202	ENSMUSG00000001666
1417947_at	0.4711	Pcna	proliferating cell nuclear antigen	18538	ENSMUSG00000027342
1430990_s_at	0.4864	Mrpl44	mitochondrial ribosomal protein L44	69163	ENSMUSG00000026248
1433984_a_at	-0.4061	Mdh2	malate dehydrogenase 2, NAD (mitochondrial)	17448	ENSMUSG00000019179
1455358_at	-0.4622	Rbfox1	RNA binding protein, fox-1 homolog (C. elegans) 1	268859	ENSMUSG00000008658
1418314_a_at	-0.4449	Rbfox1	RNA binding protein, fox-1 homolog (C. elegans) 1	268859	ENSMUSG00000008658
1424646_at	0.4468	Uckl1	uridine-cytidine kinase 1-like 1	68556	ENSMUSG00000089917
1431105_a_at	0.429	Tmem33	transmembrane protein 33	67878	ENSMUSG00000037720
1457032_at	-0.4205	Ak5	adenylate kinase 5	229949	ENSMUSG00000039058
1433878_at	0.5015	Mrps26	mitochondrial ribosomal protein S26	99045	ENSMUSG00000037740
1427548_a_at	0.4552	Clns1a	chloride channel, nucleotide-sensitive, 1A	12729	ENSMUSG00000025439
1425281_a_at	0.4341	Tsc22d3	TSC22 domain family, member 3	14605	ENSMUSG00000031431
1420772_a_at	0.3908	Tsc22d3	TSC22 domain family, member 3	14605	ENSMUSG00000031431
1455006_at	0.5302	2310016M24Rik	RIKEN cDNA 2310016M24 gene	66379	ENSMUSG00000023020
1417067_s_at	-0.3924	Adck3	aarF domain containing kinase 3	67426	ENSMUSG00000026489
1423170_at	0.4031	Taf7	TAF7 RNA polymerase II, TATA box binding protein (TBP)-associated factor	24074	ENSMUSG00000051316
1416386_a_at	0.4458	M6pr	mannose-6-phosphate receptor, cation dependent	17113	ENSMUSG00000007458
1430326_s_at	0.4346	Uqcrq	ubiquinol-cytochrome c reductase, complex III subunit VII	22272	ENSMUSG00000044894
1418377_a_at	0.4532	Siva1	SIVA1, apoptosis-inducing factor	30954	ENSMUSG00000064326
1451504_at	0.3938	Chchd3	coiled-coil-helix-coiled-coil-helix domain containing 3	66075	ENSMUSG00000053768
1422579_at	0.4522	Hspe1	heat shock protein 1 (chaperonin 10)	15528	ENSMUSG00000073676
1426480_at	0.458	Sbds	Shwachman-Bodian-Diamond syndrome homolog (human)	66711	ENSMUSG00000025337
1435566_s_at	0.5501	Araf	v-raf murine sarcoma 3611 viral oncogene homolog	11836	ENSMUSG00000001127
1424364_a_at	0.4175	Uqcr10	ubiquinol-cytochrome c reductase, complex III subunit X	66152	ENSMUSG00000059534
1420473_at	-0.3869	Mtpn	myotrophin	14489	ENSMUSG00000029840
1417206_at	0.4141	Urod	uroporphyrinogen decarboxylase	22275	ENSMUSG00000028684
1427773_a_at	0.4008	Rabac1	Rab acceptor 1 (prenylated)	14470	ENSMUSG00000003380
1428469_a_at	0.3917	Dzip1	DAZ interacting protein 1	66573	ENSMUSG00000042156
1449137_at	0.4309	Pdha1	pyruvate dehydrogenase E1 alpha 1	18597	ENSMUSG00000031299
1428153_at	0.4679	Mrps10	mitochondrial ribosomal protein S10	64657	ENSMUSG00000034729
1433818_at	0.4167	Agpat3	1-acylglycerol-3-phosphate O-acyltransferase 3	28169	ENSMUSG00000001211
1428131_a_at	-0.4354	Cdc42se1	CDC42 small effector 1	57912	ENSMUSG00000046722
1421051_s_at	0.5256	Vps25	vacuolar protein sorting 25 (yeast)	28084	ENSMUSG00000078656
1423077_at	0.3929	Snx9	sorting nexin 9	66616	NULL
1423255_at	0.4991	Atp6v1g1	ATPase, H+ transporting, lysosomal V1 subunit G1	66290	ENSMUSG00000039105
1419382_a_at	0.4213	Dhrs4	dehydrogenase/reductase (SDR family) member 4	28200	ENSMUSG00000022210
1416904_at	-0.4231	Mbnl1	muscleblind-like 1 (Drosophila)	56758	ENSMUSG00000027763
1424355_a_at	0.3868	Sin3b	transcriptional regulator, SIN3B (yeast)	20467	ENSMUSG00000031622
1427552_a_at	1	Gstz1	glutathione transferase zeta 1 (maleylacetoacetate isomerase)	14874	ENSMUSG00000021033
1417052_at	0.4441	Psmb3	proteasome (prosome, macropain) subunit, beta type 3	26446	ENSMUSG00000069744
1416789_at	0.4437	Idh3g	isocitrate dehydrogenase 3 (NAD+), gamma	15929	ENSMUSG00000002010
1420876_a_at	0.4433	2015-09-06	septin 6	56526	ENSMUSG00000050379
1449147_at	-0.3849	Chst1	carbohydrate (keratan sulfate Gal-6) sulfotransferase 1	76969	ENSMUSG00000027221
1416276_a_at	-0.4148	Rps4x	ribosomal protein S4, X-linked	20102	ENSMUSG00000031320
1451312_at	0.5365	Ndufs7	NADH dehydrogenase (ubiquinone) Fe-S protein 7	75406	ENSMUSG00000020153
1448853_at	-0.5083	Synj2bp	synaptojanin 2 binding protein	24071	ENSMUSG00000090935
1448266_at	0.4455	Edf1	endothelial differentiation-related factor 1	59022	ENSMUSG00000015092
1415729_at	-0.4129	Pdpk1	3-phosphoinositide dependent protein kinase 1	18607	ENSMUSG00000024122
1436702_at	0.3879	Nat8l	N-acetyltransferase 8-like	269642	ENSMUSG00000048142
1431645_a_at	0.4196	Gdi2	guanosine diphosphate (GDP) dissociation inhibitor 2	14569	NULL
1449116_a_at	0.4376	Dtymk	deoxythymidylate kinase	21915	ENSMUSG00000026281
1425930_a_at	0.3911	Mlx	MAX-like protein X	21428	ENSMUSG00000017801
1449225_a_at	-0.3888	Mapk8ip2	mitogen-activated protein kinase 8 interacting protein 2	60597	ENSMUSG00000022619
1448869_a_at	0.5052	Mrps16	mitochondrial ribosomal protein S16	66242	ENSMUSG00000049960
1437943_s_at	0.4537	Mea1	male enhanced antigen 1	17256	ENSMUSG00000002768
1432367_a_at	0.3856	Ufd1l	ubiquitin fusion degradation 1 like	22230	ENSMUSG00000005262
1450969_at	0.3941	Pccb	propionyl Coenzyme A carboxylase, beta polypeptide	66904	ENSMUSG00000032527
1421340_at	0.3906	Map3k5	mitogen-activated protein kinase kinase kinase 5	26408	ENSMUSG00000071369
1436342_a_at	0.4494	Ubxn1	UBX domain protein 1	225896	ENSMUSG00000071655
1418986_a_at	0.4208	Uxt	ubiquitously expressed transcript	22294	ENSMUSG00000001134
1422549_at	0.4532	Arl2	ADP-ribosylation factor-like 2	56327	ENSMUSG00000024944
1423993_at	0.3993	Atp6v1f	ATPase, H+ transporting, lysosomal V1 subunit F	66144	ENSMUSG00000004285
1436709_at	0.427	Emc1	ER membrane protein complex subunit 1	230866	ENSMUSG00000078517
1428214_at	0.4394	Tomm7	translocase of outer mitochondrial membrane 7 homolog (yeast)	66169	ENSMUSG00000028998
1429778_at	0.4421	Optn	optineurin	71648	ENSMUSG00000026672
1451307_at	0.4382	Mrpl14	mitochondrial ribosomal protein L14	68463	ENSMUSG00000023939
1422531_at	0.3913	Syt5	synaptotagmin V	53420	ENSMUSG00000004961
1416837_at	0.4039	Bax	BCL2-associated X protein	12028	ENSMUSG00000003873
1418888_a_at	0.4223	Sepx1	selenoprotein X 1	27361	ENSMUSG00000075705
1451665_a_at	0.4907	Ap4s1	adaptor-related protein complex AP-4, sigma 1	11782	ENSMUSG00000020955
1416459_at	0.4546	Arf2	ADP-ribosylation factor 2	11841	ENSMUSG00000062421
1460703_at	0.4179	Ascc1	activating signal cointegrator 1 complex subunit 1	69090	ENSMUSG00000044475
1422072_a_at	0.4444	Gstm6	glutathione S-transferase, mu 6	14867	ENSMUSG00000068762
1429708_at	0.4179	Ndufa11	NADH dehydrogenase (ubiquinone) 1 alpha subcomplex 11	69875	ENSMUSG00000002379
1426533_at	0.4832	Nop56	NOP56 ribonucleoprotein homolog (yeast)	67134	ENSMUSG00000027405
1416367_at	0.4954	1110001J03Rik	RIKEN cDNA 1110001J03 gene	66117	ENSMUSG00000019689
1431962_a_at	0.4724	Stambp	STAM binding protein	70527	ENSMUSG00000006906
1416317_a_at	0.4315	Stambp	STAM binding protein	70527	ENSMUSG00000006906
1417501_at	0.4271	Fbxo6	F-box protein 6	50762	ENSMUSG00000055401
1450895_a_at	0.3889	Cox16	COX16 cytochrome c oxidase assembly homolog (S. cerevisiae)	66272	ENSMUSG00000091803
1455266_at	-0.4283	Kif5c	kinesin family member 5C	16574	ENSMUSG00000026764
1450711_at	-0.4661	Brd4	bromodomain containing 4	57261	ENSMUSG00000024002
1422919_at	0.3889	Hrasls	HRAS-like suppressor	27281	ENSMUSG00000022525
1423413_at	0.4041	Ndrg1	N-myc downstream regulated gene 1	17988	ENSMUSG00000005125
1450976_at	0.4192	Ndrg1	N-myc downstream regulated gene 1	17988	ENSMUSG00000005125
1458285_at	-0.4474	Gria1	glutamate receptor, ionotropic, AMPA1 (alpha 1)	14799	ENSMUSG00000020524
1448274_at	0.405	C1qbp	complement component 1, q subcomponent binding protein	12261	ENSMUSG00000018446
1428964_at	0.4281	Slc25a18	solute carrier family 25 (mitochondrial carrier), member 18	71803	ENSMUSG00000004902
1416245_at	0.4012	Aurkaip1	aurora kinase A interacting protein 1	66077	ENSMUSG00000065990
1424732_s_at	0.5224	Tmem192	transmembrane protein 192	73067	ENSMUSG00000025521
1447909_s_at	0.4421	Selk	selenoprotein K	80795	ENSMUSG00000042682
1423225_at	0.4004	Selk	selenoprotein K	80795	ENSMUSG00000042682
1435074_at	-0.4147	Tmem106b	transmembrane protein 106B	71900	ENSMUSG00000029571
1456867_x_at	0.4073	Ergic3	ERGIC and golgi 3	66366	ENSMUSG00000005881
1423548_s_at	0.4287	Ergic3	ERGIC and golgi 3	66366	ENSMUSG00000005881
1417605_s_at	0.4011	Camk1	calcium/calmodulin-dependent protein kinase I	52163	ENSMUSG00000030272
1417604_at	0.3946	Camk1	calcium/calmodulin-dependent protein kinase I	52163	ENSMUSG00000030272
1448154_at	0.4399	Ndrg2	N-myc downstream regulated gene 2	29811	ENSMUSG00000004558
1422662_at	0.4118	Lgals8	lectin, galactose binding, soluble 8	56048	ENSMUSG00000057554
1454892_at	-0.4159	Pitpnb	phosphatidylinositol transfer protein, beta	56305	ENSMUSG00000050017
1434257_s_at	-0.4175	Pitpnb	phosphatidylinositol transfer protein, beta	56305	ENSMUSG00000050017
1423840_at	0.4437	Coa3	cytochrome C oxidase assembly factor 3	52469	ENSMUSG00000017188
1460360_at	0.3927	Asrgl1	asparaginase like 1	66514	ENSMUSG00000024654
1448699_at	0.4656	Mrpl54	mitochondrial ribosomal protein L54	66047	ENSMUSG00000034932
1457600_x_at	-0.3932	Nkd2	naked cuticle 2 homolog (Drosophila)	72293	ENSMUSG00000021567
1416212_at	0.4508	Magoh	mago-nashi homolog, proliferation-associated (Drosophila)	17149	ENSMUSG00000028609
1416593_at	0.4554	Glrx	glutaredoxin	93692	ENSMUSG00000021591
1456243_x_at	-0.4024	Mcl1	myeloid cell leukemia sequence 1	17210	ENSMUSG00000038612
1437527_x_at	-0.4303	Mcl1	myeloid cell leukemia sequence 1	17210	ENSMUSG00000038612
1416583_at	0.4059	Bad	BCL2-associated agonist of cell death	12015	ENSMUSG00000024959
1422449_s_at	0.391	Rcn2	reticulocalbin 2	26611	ENSMUSG00000032320
1421970_a_at	-0.4056	Gria2	glutamate receptor, ionotropic, AMPA2 (alpha 2)	14800	ENSMUSG00000033981
1451650_at	0.4141	Ddo	D-aspartate oxidase	70503	ENSMUSG00000063428
1416994_at	0.5115	Ttc1	tetratricopeptide repeat domain 1	66827	ENSMUSG00000041278
1426187_a_at	0.4107	Hax1	HCLS1 associated X-1	23897	ENSMUSG00000027944
1416335_at	0.4628	Mif	macrophage migration inhibitory factor	17319	ENSMUSG00000033307
1448677_at	0.4366	Emc8	ER membrane protein complex subunit 8	18117	ENSMUSG00000031819
1417421_at	0.4717	S100a1	S100 calcium binding protein A1	20193	ENSMUSG00000044080
1453567_s_at	0.4437	Tmem216	transmembrane protein 216	68642	ENSMUSG00000024667
1416951_a_at	-0.4038	Atp6v1d	ATPase, H+ transporting, lysosomal V1 subunit D	73834	ENSMUSG00000021114
1420965_a_at	-0.3915	Enc1	ectodermal-neural cortex 1	13803	ENSMUSG00000041773
1423544_at	0.3861	Ptpn5	protein tyrosine phosphatase, non-receptor type 5	19259	ENSMUSG00000030854
1437473_at	-0.525	Maf	avian musculoaponeurotic fibrosarcoma (v-maf) AS42 oncogene homolog	17132	ENSMUSG00000055435
1422976_x_at	0.4927	Ndufa7	NADH dehydrogenase (ubiquinone) 1 alpha subcomplex, 7 (B14.5a)	66416	ENSMUSG00000041881
1455749_x_at	0.4688	Ndufa7	NADH dehydrogenase (ubiquinone) 1 alpha subcomplex, 7 (B14.5a)	66416	ENSMUSG00000041881
1428360_x_at	0.527	Ndufa7	NADH dehydrogenase (ubiquinone) 1 alpha subcomplex, 7 (B14.5a)	66416	ENSMUSG00000041881
1450818_a_at	0.4138	Ndufa7	NADH dehydrogenase (ubiquinone) 1 alpha subcomplex, 7 (B14.5a)	66416	ENSMUSG00000041881
1436567_a_at	0.5276	Ndufa7	NADH dehydrogenase (ubiquinone) 1 alpha subcomplex, 7 (B14.5a)	66416	ENSMUSG00000041881
1449025_at	0.3849	Ifit3	interferon-induced protein with tetratricopeptide repeats 3	15959	ENSMUSG00000074896
1418002_at	0.479	Higd2a	HIG1 domain family, member 2A	67044	ENSMUSG00000025868
1416849_at	0.4703	Cisd1	CDGSH iron sulfur domain 1	52637	ENSMUSG00000037710
1415744_at	0.4057	H2-Ke2	H2-K region expressed gene 2	14976	ENSMUSG00000024309
1419428_a_at	0.4187	Gaa	glucosidase, alpha, acid	14387	ENSMUSG00000025579
1455061_a_at	0.4767	Acaa2	acetyl-Coenzyme A acyltransferase 2 (mitochondrial 3-oxoacyl-Coenzyme A thiolase)	52538	ENSMUSG00000036880
1416766_at	0.3961	Mosc2	MOCO sulphurase C-terminal domain containing 2	67247	ENSMUSG00000073481
1442549_at	-0.4167	Mbnl3	muscleblind-like 3 (Drosophila)	171170	ENSMUSG00000036109
1429776_a_at	0.4103	Dnajb6	DnaJ (Hsp40) homolog, subfamily B, member 6	23950	ENSMUSG00000029131
1416093_a_at	0.5553	Mrpl20	mitochondrial ribosomal protein L20	66448	ENSMUSG00000029066
1439777_at	-0.4144	Celf2	CUGBP, Elav-like family member 2	14007	ENSMUSG00000002107
1452874_at	-0.4189	2510003E04Rik	RIKEN cDNA 2510003E04 gene	72320	ENSMUSG00000036955
1417593_at	0.4398	Tusc2	tumor suppressor candidate 2	80385	ENSMUSG00000010054
1429709_at	0.3934	Pmpcb	peptidase (mitochondrial processing) beta	73078	ENSMUSG00000029017
1426958_at	0.4026	Rps9	ribosomal protein S9	76846	ENSMUSG00000006333
1433689_s_at	0.5417	Rps9	ribosomal protein S9	76846	ENSMUSG00000006333
1422694_at	0.4001	Ttyh1	tweety homolog 1 (Drosophila)	57776	ENSMUSG00000030428
1450048_a_at	0.4154	Idh2	isocitrate dehydrogenase 2 (NADP+), mitochondrial	269951	ENSMUSG00000030541
1455713_x_at	-0.4264	Phb2	prohibitin 2	12034	ENSMUSG00000004264
1445440_at	-0.4	Ccdc88a	coiled coil domain containing 88A	108686	ENSMUSG00000032740
1428789_at	-0.4142	Ralgps2	Ral GEF with PH domain and SH3 binding motif 2	78255	ENSMUSG00000026594
1451377_a_at	0.4174	Aaas	achalasia, adrenocortical insufficiency, alacrimia	223921	ENSMUSG00000036678
1427578_a_at	0.4229	Eif6	eukaryotic translation initiation factor 6	16418	ENSMUSG00000027613
1422491_a_at	0.4349	Bnip2	BCL2/adenovirus E1B interacting protein 2	12175	ENSMUSG00000011958
1453993_a_at	0.487	Bnip2	BCL2/adenovirus E1B interacting protein 2	12175	ENSMUSG00000011958
1437909_at	0.4128	Srcap	Snf2-related CREBBP activator protein	100043597	NULL
1433938_at	0.475	Trp53bp2	transformation related protein 53 binding protein 2	209456	ENSMUSG00000026510
1423299_at	0.4198	Txnl1	thioredoxin-like 1	53382	ENSMUSG00000024583
1418185_at	0.5046	Ndufaf3	NADH dehydrogenase (ubiquinone) 1 alpha subcomplex, assembly factor 3	66706	ENSMUSG00000070283
1434159_at	-0.4204	Stk4	serine/threonine kinase 4	58231	ENSMUSG00000018209
1418228_at	0.4644	Nfu1	NFU1 iron-sulfur cluster scaffold homolog (S. cerevisiae)	56748	ENSMUSG00000029993
1416220_at	0.4053	Spcs1	signal peptidase complex subunit 1 homolog (S. cerevisiae)	69019	ENSMUSG00000021917
1460181_at	0.3966	Stmn3	stathmin-like 3	20262	ENSMUSG00000027581
1416764_at	0.4158	Fis1	fission 1 (mitochondrial outer membrane) homolog (yeast)	66437	ENSMUSG00000019054
1448387_at	0.3943	Rbx1	ring-box 1	56438	ENSMUSG00000022400
1443843_x_at	-0.4012	Rpl9	ribosomal protein L9	20005	ENSMUSG00000047215
1437064_at	-0.4398	Ar	androgen receptor	11835	ENSMUSG00000046532
1448420_a_at	0.409	Fbxl12	F-box and leucine-rich repeat protein 12	30843	ENSMUSG00000066892
1430780_a_at	0.4086	Pmm1	phosphomannomutase 1	29858	ENSMUSG00000022474
1432462_a_at	0.474	Med27	mediator complex subunit 27	68975	ENSMUSG00000026799
1433915_s_at	-0.463	Epn2	epsin 2	13855	ENSMUSG00000001036
1415677_at	0.3874	Dhrs1	dehydrogenase/reductase (SDR family) member 1	52585	ENSMUSG00000002332
1451164_a_at	0.5042	Mrps18b	mitochondrial ribosomal protein S18B	66973	ENSMUSG00000024436
1416226_at	0.4322	Arpc1b	actin related protein 2/3 complex, subunit 1B	11867	ENSMUSG00000029622
1448718_at	0.4361	Lamtor1	late endosomal/lysosomal adaptor, MAPK and MTOR activator 1	66508	ENSMUSG00000030842
1451269_at	0.3896	Pdzd11	PDZ domain containing 11	72621	ENSMUSG00000015668
1427921_s_at	0.4227	2310061C15Rik	RIKEN cDNA 2310061C15 gene	66531	ENSMUSG00000014633
1437331_a_at	-0.4151	Arf3	ADP-ribosylation factor 3	11842	ENSMUSG00000051853
1424367_a_at	-0.3908	Homer2	homer homolog 2 (Drosophila)	26557	ENSMUSG00000025813
1422879_at	0.409	Sypl	synaptophysin-like protein	19027	ENSMUSG00000020570
1448905_at	0.4337	Nme3	NME/NM23 nucleoside diphosphate kinase 3	79059	ENSMUSG00000073435
1452341_at	0.433	Echs1	enoyl Coenzyme A hydratase, short chain, 1, mitochondrial	93747	ENSMUSG00000025465
1452026_a_at	0.4353	Pla2g12a	phospholipase A2, group XIIA	66350	ENSMUSG00000027999
1421872_at	0.4076	Rab24	RAB24, member RAS oncogene family	19336	ENSMUSG00000034789
1421873_s_at	0.4295	Rab24	RAB24, member RAS oncogene family	19336	ENSMUSG00000034789
1426373_at	-0.4173	Ski	ski sarcoma viral oncogene homolog (avian)	20481	ENSMUSG00000029050
1452173_at	0.4082	Hadha	hydroxyacyl-Coenzyme A dehydrogenase/3-ketoacyl-Coenzyme A thiolase/enoyl-Coenzyme A hydratase (trifunctional protein), alpha subunit	97212	ENSMUSG00000025745
1436180_at	-0.4146	Dnajc5	DnaJ (Hsp40) homolog, subfamily C, member 5	13002	ENSMUSG00000000826
cellular component	mitochondrial part	GO:0044429
C=548;O=45;E=12.27;R=3.67;rawP=4.36e-14;adjP=3.45e-12
Probe Set ID	R	Gene Symbol	Description	Entrez ID	Ensemble Gene Stable ID
1448853_at	-0.5083	Synj2bp	synaptojanin 2 binding protein	24071	ENSMUSG00000090935
1451312_at	0.5365	Ndufs7	NADH dehydrogenase (ubiquinone) Fe-S protein 7	75406	ENSMUSG00000020153
1416834_x_at	0.4474	Ndufb2	NADH dehydrogenase (ubiquinone) 1 beta subcomplex, 2	68198	ENSMUSG00000002416
1448483_a_at	0.3949	Ndufb2	NADH dehydrogenase (ubiquinone) 1 beta subcomplex, 2	68198	ENSMUSG00000002416
1416337_at	0.3959	Uqcrb	ubiquinol-cytochrome c reductase binding protein	67530	ENSMUSG00000021520
1436702_at	0.3879	Nat8l	N-acetyltransferase 8-like	269642	ENSMUSG00000048142
1449116_a_at	0.4376	Dtymk	deoxythymidylate kinase	21915	ENSMUSG00000026281
1422976_x_at	0.4927	Ndufa7	NADH dehydrogenase (ubiquinone) 1 alpha subcomplex, 7 (B14.5a)	66416	ENSMUSG00000041881
1455749_x_at	0.4688	Ndufa7	NADH dehydrogenase (ubiquinone) 1 alpha subcomplex, 7 (B14.5a)	66416	ENSMUSG00000041881
1428360_x_at	0.527	Ndufa7	NADH dehydrogenase (ubiquinone) 1 alpha subcomplex, 7 (B14.5a)	66416	ENSMUSG00000041881
1450818_a_at	0.4138	Ndufa7	NADH dehydrogenase (ubiquinone) 1 alpha subcomplex, 7 (B14.5a)	66416	ENSMUSG00000041881
1436567_a_at	0.5276	Ndufa7	NADH dehydrogenase (ubiquinone) 1 alpha subcomplex, 7 (B14.5a)	66416	ENSMUSG00000041881
1448887_x_at	0.4983	Fxc1	fractured callus expressed transcript 1	14356	ENSMUSG00000089847
1436416_x_at	0.5577	Fxc1	fractured callus expressed transcript 1	14356	ENSMUSG00000089847
1417916_a_at	0.6189	Fxc1	fractured callus expressed transcript 1	14356	ENSMUSG00000089847
1416349_at	0.4602	Mrpl34	mitochondrial ribosomal protein L34	94065	ENSMUSG00000034880
1450865_s_at	0.3921	Mrps24	mitochondrial ribosomal protein S24	64660	ENSMUSG00000020477
1416849_at	0.4703	Cisd1	CDGSH iron sulfur domain 1	52637	ENSMUSG00000037710
1451088_a_at	0.4332	Oxa1l	oxidase assembly 1-like	69089	ENSMUSG00000000959
1448869_a_at	0.5052	Mrps16	mitochondrial ribosomal protein S16	66242	ENSMUSG00000049960
1455061_a_at	0.4767	Acaa2	acetyl-Coenzyme A acyltransferase 2 (mitochondrial 3-oxoacyl-Coenzyme A thiolase)	52538	ENSMUSG00000036880
1416766_at	0.3961	Mosc2	MOCO sulphurase C-terminal domain containing 2	67247	ENSMUSG00000073481
1452048_at	0.3927	Mrpl12	mitochondrial ribosomal protein L12	56282	ENSMUSG00000039640
1416093_a_at	0.5553	Mrpl20	mitochondrial ribosomal protein L20	66448	ENSMUSG00000029066
1433984_a_at	-0.4061	Mdh2	malate dehydrogenase 2, NAD (mitochondrial)	17448	ENSMUSG00000019179
1422549_at	0.4532	Arl2	ADP-ribosylation factor-like 2	56327	ENSMUSG00000024944
1429709_at	0.3934	Pmpcb	peptidase (mitochondrial processing) beta	73078	ENSMUSG00000029017
1450048_a_at	0.4154	Idh2	isocitrate dehydrogenase 2 (NADP+), mitochondrial	269951	ENSMUSG00000030541
1450405_at	0.417	Mrpl19	mitochondrial ribosomal protein L19	56284	ENSMUSG00000030045
1455713_x_at	-0.4264	Phb2	prohibitin 2	12034	ENSMUSG00000004264
1417918_at	0.4001	Mrpl11	mitochondrial ribosomal protein L11	66419	ENSMUSG00000024902
1448286_at	0.4051	Hsd17b10	hydroxysteroid (17-beta) dehydrogenase 10	15108	ENSMUSG00000025260
1433878_at	0.5015	Mrps26	mitochondrial ribosomal protein S26	99045	ENSMUSG00000037740
1428214_at	0.4394	Tomm7	translocase of outer mitochondrial membrane 7 homolog (yeast)	66169	ENSMUSG00000028998
1416837_at	0.4039	Bax	BCL2-associated X protein	12028	ENSMUSG00000003873
1429708_at	0.4179	Ndufa11	NADH dehydrogenase (ubiquinone) 1 alpha subcomplex 11	69875	ENSMUSG00000002379
1450895_a_at	0.3889	Cox16	COX16 cytochrome c oxidase assembly homolog (S. cerevisiae)	66272	ENSMUSG00000091803
1418185_at	0.5046	Ndufaf3	NADH dehydrogenase (ubiquinone) 1 alpha subcomplex, assembly factor 3	66706	ENSMUSG00000070283
1430326_s_at	0.4346	Uqcrq	ubiquinol-cytochrome c reductase, complex III subunit VII	22272	ENSMUSG00000044894
1451504_at	0.3938	Chchd3	coiled-coil-helix-coiled-coil-helix domain containing 3	66075	ENSMUSG00000053768
1422579_at	0.4522	Hspe1	heat shock protein 1 (chaperonin 10)	15528	ENSMUSG00000073676
1429110_a_at	0.3935	Nsun4	NOL1/NOP2/Sun domain family, member 4	72181	ENSMUSG00000028706
1424364_a_at	0.4175	Uqcr10	ubiquinol-cytochrome c reductase, complex III subunit X	66152	ENSMUSG00000059534
1448427_at	0.4803	Ndufa6	NADH dehydrogenase (ubiquinone) 1 alpha subcomplex, 6 (B14)	67130	ENSMUSG00000022450
1448292_at	0.4089	Uqcr11	ubiquinol-cytochrome c reductase, complex III subunit XI	66594	ENSMUSG00000020163
1416764_at	0.4158	Fis1	fission 1 (mitochondrial outer membrane) homolog (yeast)	66437	ENSMUSG00000019054
1428153_at	0.4679	Mrps10	mitochondrial ribosomal protein S10	64657	ENSMUSG00000034729
1415677_at	0.3874	Dhrs1	dehydrogenase/reductase (SDR family) member 1	52585	ENSMUSG00000002332
1428964_at	0.4281	Slc25a18	solute carrier family 25 (mitochondrial carrier), member 18	71803	ENSMUSG00000004902
1456243_x_at	-0.4024	Mcl1	myeloid cell leukemia sequence 1	17210	ENSMUSG00000038612
1437527_x_at	-0.4303	Mcl1	myeloid cell leukemia sequence 1	17210	ENSMUSG00000038612
1452173_at	0.4082	Hadha	hydroxyacyl-Coenzyme A dehydrogenase/3-ketoacyl-Coenzyme A thiolase/enoyl-Coenzyme A hydratase (trifunctional protein), alpha subunit	97212	ENSMUSG00000025745
1416583_at	0.4059	Bad	BCL2-associated agonist of cell death	12015	ENSMUSG00000024959
cellular component	intracellular membrane-bounded organelle	GO:0043231
C=8037;O=250;E=179.97;R=1.39;rawP=1.94e-13;adjP=9.66e-12
Probe Set ID	R	Gene Symbol	Description	Entrez ID	Ensemble Gene Stable ID
1419536_a_at	0.3952	Rela	v-rel reticuloendotheliosis viral oncogene homolog A (avian)	19697	ENSMUSG00000024927
1450683_at	0.4041	Tagln3	transgelin 3	56370	ENSMUSG00000022658
1448524_s_at	0.5505	Ssr4	signal sequence receptor, delta	20832	ENSMUSG00000002014
1448003_at	0.4784	1810043H04Rik	RIKEN cDNA 1810043H04 gene	208501	ENSMUSG00000078572
1438443_at	-0.4463	Zbtb20	zinc finger and BTB domain containing 20	56490	ENSMUSG00000022708
1451088_a_at	0.4332	Oxa1l	oxidase assembly 1-like	69089	ENSMUSG00000000959
1456170_x_at	-0.3981	Calr	calreticulin	12317	ENSMUSG00000003814
1417606_a_at	-0.4667	Calr	calreticulin	12317	ENSMUSG00000003814
1428515_at	0.4139	Zswim7	zinc finger, SWIM-type containing 7	69747	ENSMUSG00000014243
1417010_at	-0.385	Zfp238	zinc finger protein 238	30928	ENSMUSG00000063659
1417999_at	-0.4163	Itm2b	integral membrane protein 2B	16432	ENSMUSG00000022108
1435991_at	-0.4158	Nr3c2	nuclear receptor subfamily 3, group C, member 2	110784	ENSMUSG00000031618
1433520_at	-0.4331	Scap	SREBF chaperone	235623	ENSMUSG00000032485
1460725_at	0.3976	Xpa	xeroderma pigmentosum, complementation group A	22590	ENSMUSG00000028329
1434370_s_at	0.3945	Faf1	Fas-associated factor 1	14084	ENSMUSG00000010517
1417287_at	0.4165	H13	histocompatibility 13	14950	ENSMUSG00000019188
1450405_at	0.417	Mrpl19	mitochondrial ribosomal protein L19	56284	ENSMUSG00000030045
1417918_at	0.4001	Mrpl11	mitochondrial ribosomal protein L11	66419	ENSMUSG00000024902
1448286_at	0.4051	Hsd17b10	hydroxysteroid (17-beta) dehydrogenase 10	15108	ENSMUSG00000025260
1453564_a_at	0.3954	Chmp3	charged multivesicular body protein 3	66700	ENSMUSG00000053119
1451943_a_at	0.4764	Ppm1a	protein phosphatase 1A, magnesium dependent, alpha isoform	19042	ENSMUSG00000021096
1416332_at	0.4426	Cirbp	cold inducible RNA binding protein	12696	ENSMUSG00000045193
1439161_at	-0.4957	Ppp6r3	protein phosphatase 6, regulatory subunit 3	52036	ENSMUSG00000024908
1415885_at	-0.3864	Chgb	chromogranin B	12653	ENSMUSG00000027350
1426414_a_at	0.4052	Rnf7	ring finger protein 7	19823	ENSMUSG00000051234
1424685_at	0.403	Exosc4	exosome component 4	109075	ENSMUSG00000034259
1423814_at	0.4275	Ddx41	DEAD (Asp-Glu-Ala-Asp) box polypeptide 41	72935	ENSMUSG00000021494
1433834_at	-0.4043	2015-03-06	membrane-associated ring finger (C3HC4) 6	223455	ENSMUSG00000039100
1427282_a_at	0.3939	Fxn	frataxin	14297	ENSMUSG00000059363
1419420_at	-0.4827	St6galnac5	ST6 (alpha-N-acetyl-neuraminyl-2,3-beta-galactosyl-1,3)-N-acetylgalactosaminide alpha-2,6-sialyltransferase 5	26938	ENSMUSG00000039037
1416831_at	0.4436	Neu1	neuraminidase 1	18010	ENSMUSG00000007038
1429110_a_at	0.3935	Nsun4	NOL1/NOP2/Sun domain family, member 4	72181	ENSMUSG00000028706
1454758_a_at	0.4256	Tsc22d1	TSC22 domain family, member 1	21807	ENSMUSG00000022010
1450776_at	0.4358	Agpat6	1-acylglycerol-3-phosphate O-acyltransferase 6 (lysophosphatidic acid acyltransferase, zeta)	102247	ENSMUSG00000031545
1432489_a_at	0.4544	Wdyhv1	WDYHV motif containing 1	76773	ENSMUSG00000022359
1433535_x_at	-0.4613	Cct2	chaperonin containing Tcp1, subunit 2 (beta)	12461	ENSMUSG00000034024
1448427_at	0.4803	Ndufa6	NADH dehydrogenase (ubiquinone) 1 alpha subcomplex, 6 (B14)	67130	ENSMUSG00000022450
1434540_a_at	0.4062	Clta	clathrin, light polypeptide (Lca)	12757	ENSMUSG00000028478
1448292_at	0.4089	Uqcr11	ubiquinol-cytochrome c reductase, complex III subunit XI	66594	ENSMUSG00000020163
1424164_at	0.4969	Mrpl50	mitochondrial ribosomal protein L50	28028	ENSMUSG00000044018
1422480_at	-0.4214	Snx3	sorting nexin 3	54198	ENSMUSG00000019804
1423820_at	0.5232	Elof1	elongation factor 1 homolog (ELF1, S. cerevisiae)	66126	ENSMUSG00000013822
1417780_at	0.4193	Lass4	LAG1 homolog, ceramide synthase 4	67260	ENSMUSG00000008206
1421083_x_at	0.409	Banf1	barrier to autointegration factor 1	23825	ENSMUSG00000024844
1421081_a_at	0.4055	Banf1	barrier to autointegration factor 1	23825	ENSMUSG00000024844
1434904_at	-0.401	Hivep2	human immunodeficiency virus type I enhancer binding protein 2	15273	ENSMUSG00000015501
1423158_at	0.3981	Gnpnat1	glucosamine-phosphate N-acetyltransferase 1	54342	ENSMUSG00000037722
1425371_at	-0.4209	Polb	polymerase (DNA directed), beta	18970	ENSMUSG00000031536
1428380_at	0.5038	Atraid	all-trans retinoic acid induced differentiation factor	381629	ENSMUSG00000013622
1423223_a_at	0.4657	Prdx6	peroxiredoxin 6	11758	ENSMUSG00000026701
1417868_a_at	0.5132	Ctsz	cathepsin Z	64138	ENSMUSG00000016256
1417870_x_at	0.4574	Ctsz	cathepsin Z	64138	ENSMUSG00000016256
1422432_at	0.5004	Dbi	diazepam binding inhibitor	13167	ENSMUSG00000026385
1416023_at	0.4447	Fabp3	fatty acid binding protein 3, muscle and heart	14077	ENSMUSG00000028773
1423128_at	0.4028	Aip	aryl-hydrocarbon receptor-interacting protein	11632	ENSMUSG00000024847
1452251_at	-0.4198	Nbea	neurobeachin	26422	ENSMUSG00000027799
1451412_a_at	0.4325	Ift20	intraflagellar transport 20	55978	ENSMUSG00000001105
1416496_at	-0.4028	Mrfap1	Morf4 family associated protein 1	67568	ENSMUSG00000055302
1422482_at	0.4138	Ruvbl2	RuvB-like protein 2	20174	ENSMUSG00000003868
1416834_x_at	0.4474	Ndufb2	NADH dehydrogenase (ubiquinone) 1 beta subcomplex, 2	68198	ENSMUSG00000002416
1448483_a_at	0.3949	Ndufb2	NADH dehydrogenase (ubiquinone) 1 beta subcomplex, 2	68198	ENSMUSG00000002416
1417064_at	0.4655	Jagn1	jagunal homolog 1 (Drosophila)	67767	ENSMUSG00000051256
1416615_at	0.5067	Clpp	ClpP caseinolytic peptidase, ATP-dependent, proteolytic subunit	53895	ENSMUSG00000002660
1424018_at	0.4474	Hint1	histidine triad nucleotide binding protein 1	15254	ENSMUSG00000020267
1416337_at	0.3959	Uqcrb	ubiquinol-cytochrome c reductase binding protein	67530	ENSMUSG00000021520
1439314_at	-0.3973	Clock	circadian locomotor output cycles kaput	12753	ENSMUSG00000029238
1418660_at	-0.3989	Clock	circadian locomotor output cycles kaput	12753	ENSMUSG00000029238
1425507_at	0.4115	Arfrp1	ADP-ribosylation factor related protein 1	76688	ENSMUSG00000038671
1456196_x_at	-0.4117	Fkbp1a	FK506 binding protein 1a	14225	ENSMUSG00000032966
1438958_x_at	-0.4292	Fkbp1a	FK506 binding protein 1a	14225	ENSMUSG00000032966
1422507_at	0.4578	Cstb	cystatin B	13014	ENSMUSG00000005054
1448887_x_at	0.4983	Fxc1	fractured callus expressed transcript 1	14356	ENSMUSG00000089847
1436416_x_at	0.5577	Fxc1	fractured callus expressed transcript 1	14356	ENSMUSG00000089847
1417916_a_at	0.6189	Fxc1	fractured callus expressed transcript 1	14356	ENSMUSG00000089847
1416349_at	0.4602	Mrpl34	mitochondrial ribosomal protein L34	94065	ENSMUSG00000034880
1450865_s_at	0.3921	Mrps24	mitochondrial ribosomal protein S24	64660	ENSMUSG00000020477
1451162_at	0.4576	Hsbp1	heat shock factor binding protein 1	68196	ENSMUSG00000031839
1433921_s_at	0.4566	Dph3	DPH3 homolog (KTI11, S. cerevisiae)	105638	ENSMUSG00000021905
1450054_at	-0.4064	Add1	adducin 1 (alpha)	11518	ENSMUSG00000029106
1419249_at	-0.4093	Cdk14	cyclin-dependent kinase 14	18647	ENSMUSG00000028926
1452048_at	0.3927	Mrpl12	mitochondrial ribosomal protein L12	56282	ENSMUSG00000039640
1417947_at	0.4711	Pcna	proliferating cell nuclear antigen	18538	ENSMUSG00000027342
1430990_s_at	0.4864	Mrpl44	mitochondrial ribosomal protein L44	69163	ENSMUSG00000026248
1433984_a_at	-0.4061	Mdh2	malate dehydrogenase 2, NAD (mitochondrial)	17448	ENSMUSG00000019179
1455358_at	-0.4622	Rbfox1	RNA binding protein, fox-1 homolog (C. elegans) 1	268859	ENSMUSG00000008658
1418314_a_at	-0.4449	Rbfox1	RNA binding protein, fox-1 homolog (C. elegans) 1	268859	ENSMUSG00000008658
1424646_at	0.4468	Uckl1	uridine-cytidine kinase 1-like 1	68556	ENSMUSG00000089917
1431105_a_at	0.429	Tmem33	transmembrane protein 33	67878	ENSMUSG00000037720
1433878_at	0.5015	Mrps26	mitochondrial ribosomal protein S26	99045	ENSMUSG00000037740
1425281_a_at	0.4341	Tsc22d3	TSC22 domain family, member 3	14605	ENSMUSG00000031431
1420772_a_at	0.3908	Tsc22d3	TSC22 domain family, member 3	14605	ENSMUSG00000031431
1455242_at	-0.3853	Foxp1	forkhead box P1	108655	ENSMUSG00000030067
1455006_at	0.5302	2310016M24Rik	RIKEN cDNA 2310016M24 gene	66379	ENSMUSG00000023020
1417067_s_at	-0.3924	Adck3	aarF domain containing kinase 3	67426	ENSMUSG00000026489
1423170_at	0.4031	Taf7	TAF7 RNA polymerase II, TATA box binding protein (TBP)-associated factor	24074	ENSMUSG00000051316
1416386_a_at	0.4458	M6pr	mannose-6-phosphate receptor, cation dependent	17113	ENSMUSG00000007458
1430326_s_at	0.4346	Uqcrq	ubiquinol-cytochrome c reductase, complex III subunit VII	22272	ENSMUSG00000044894
1418377_a_at	0.4532	Siva1	SIVA1, apoptosis-inducing factor	30954	ENSMUSG00000064326
1451504_at	0.3938	Chchd3	coiled-coil-helix-coiled-coil-helix domain containing 3	66075	ENSMUSG00000053768
1422579_at	0.4522	Hspe1	heat shock protein 1 (chaperonin 10)	15528	ENSMUSG00000073676
1426480_at	0.458	Sbds	Shwachman-Bodian-Diamond syndrome homolog (human)	66711	ENSMUSG00000025337
1433939_at	-0.3995	Aff3	AF4/FMR2 family, member 3	16764	ENSMUSG00000037138
1435566_s_at	0.5501	Araf	v-raf murine sarcoma 3611 viral oncogene homolog	11836	ENSMUSG00000001127
1424364_a_at	0.4175	Uqcr10	ubiquinol-cytochrome c reductase, complex III subunit X	66152	ENSMUSG00000059534
1420473_at	-0.3869	Mtpn	myotrophin	14489	ENSMUSG00000029840
1417206_at	0.4141	Urod	uroporphyrinogen decarboxylase	22275	ENSMUSG00000028684
1427773_a_at	0.4008	Rabac1	Rab acceptor 1 (prenylated)	14470	ENSMUSG00000003380
1428469_a_at	0.3917	Dzip1	DAZ interacting protein 1	66573	ENSMUSG00000042156
1449137_at	0.4309	Pdha1	pyruvate dehydrogenase E1 alpha 1	18597	ENSMUSG00000031299
1428153_at	0.4679	Mrps10	mitochondrial ribosomal protein S10	64657	ENSMUSG00000034729
1433818_at	0.4167	Agpat3	1-acylglycerol-3-phosphate O-acyltransferase 3	28169	ENSMUSG00000001211
1428131_a_at	-0.4354	Cdc42se1	CDC42 small effector 1	57912	ENSMUSG00000046722
1421051_s_at	0.5256	Vps25	vacuolar protein sorting 25 (yeast)	28084	ENSMUSG00000078656
1423077_at	0.3929	Snx9	sorting nexin 9	66616	NULL
1423255_at	0.4991	Atp6v1g1	ATPase, H+ transporting, lysosomal V1 subunit G1	66290	ENSMUSG00000039105
1419382_a_at	0.4213	Dhrs4	dehydrogenase/reductase (SDR family) member 4	28200	ENSMUSG00000022210
1416904_at	-0.4231	Mbnl1	muscleblind-like 1 (Drosophila)	56758	ENSMUSG00000027763
1424355_a_at	0.3868	Sin3b	transcriptional regulator, SIN3B (yeast)	20467	ENSMUSG00000031622
1427552_a_at	1	Gstz1	glutathione transferase zeta 1 (maleylacetoacetate isomerase)	14874	ENSMUSG00000021033
1417720_at	0.4897	Polr2j	polymerase (RNA) II (DNA directed) polypeptide J	20022	ENSMUSG00000039771
1417052_at	0.4441	Psmb3	proteasome (prosome, macropain) subunit, beta type 3	26446	ENSMUSG00000069744
1416789_at	0.4437	Idh3g	isocitrate dehydrogenase 3 (NAD+), gamma	15929	ENSMUSG00000002010
1419516_at	0.4056	Fam50a	family with sequence similarity 50, member A	108160	ENSMUSG00000001962
1420876_a_at	0.4433	2015-09-06	septin 6	56526	ENSMUSG00000050379
1449147_at	-0.3849	Chst1	carbohydrate (keratan sulfate Gal-6) sulfotransferase 1	76969	ENSMUSG00000027221
1451312_at	0.5365	Ndufs7	NADH dehydrogenase (ubiquinone) Fe-S protein 7	75406	ENSMUSG00000020153
1448853_at	-0.5083	Synj2bp	synaptojanin 2 binding protein	24071	ENSMUSG00000090935
1448266_at	0.4455	Edf1	endothelial differentiation-related factor 1	59022	ENSMUSG00000015092
1415729_at	-0.4129	Pdpk1	3-phosphoinositide dependent protein kinase 1	18607	ENSMUSG00000024122
1436702_at	0.3879	Nat8l	N-acetyltransferase 8-like	269642	ENSMUSG00000048142
1438216_at	-0.4424	Rreb1	ras responsive element binding protein 1	68750	ENSMUSG00000039087
1431645_a_at	0.4196	Gdi2	guanosine diphosphate (GDP) dissociation inhibitor 2	14569	NULL
1449116_a_at	0.4376	Dtymk	deoxythymidylate kinase	21915	ENSMUSG00000026281
1425930_a_at	0.3911	Mlx	MAX-like protein X	21428	ENSMUSG00000017801
1448869_a_at	0.5052	Mrps16	mitochondrial ribosomal protein S16	66242	ENSMUSG00000049960
1448414_at	0.3884	Rad1	RAD1 homolog (S. pombe)	19355	ENSMUSG00000022248
1432367_a_at	0.3856	Ufd1l	ubiquitin fusion degradation 1 like	22230	ENSMUSG00000005262
1450969_at	0.3941	Pccb	propionyl Coenzyme A carboxylase, beta polypeptide	66904	ENSMUSG00000032527
1421340_at	0.3906	Map3k5	mitogen-activated protein kinase kinase kinase 5	26408	ENSMUSG00000071369
1436342_a_at	0.4494	Ubxn1	UBX domain protein 1	225896	ENSMUSG00000071655
1418986_a_at	0.4208	Uxt	ubiquitously expressed transcript	22294	ENSMUSG00000001134
1422549_at	0.4532	Arl2	ADP-ribosylation factor-like 2	56327	ENSMUSG00000024944
1423993_at	0.3993	Atp6v1f	ATPase, H+ transporting, lysosomal V1 subunit F	66144	ENSMUSG00000004285
1436709_at	0.427	Emc1	ER membrane protein complex subunit 1	230866	ENSMUSG00000078517
1435411_at	-0.4542	Neurod2	neurogenic differentiation 2	18013	ENSMUSG00000038255
1428214_at	0.4394	Tomm7	translocase of outer mitochondrial membrane 7 homolog (yeast)	66169	ENSMUSG00000028998
1429778_at	0.4421	Optn	optineurin	71648	ENSMUSG00000026672
1451307_at	0.4382	Mrpl14	mitochondrial ribosomal protein L14	68463	ENSMUSG00000023939
1422531_at	0.3913	Syt5	synaptotagmin V	53420	ENSMUSG00000004961
1416837_at	0.4039	Bax	BCL2-associated X protein	12028	ENSMUSG00000003873
1418888_a_at	0.4223	Sepx1	selenoprotein X 1	27361	ENSMUSG00000075705
1451665_a_at	0.4907	Ap4s1	adaptor-related protein complex AP-4, sigma 1	11782	ENSMUSG00000020955
1416459_at	0.4546	Arf2	ADP-ribosylation factor 2	11841	ENSMUSG00000062421
1460703_at	0.4179	Ascc1	activating signal cointegrator 1 complex subunit 1	69090	ENSMUSG00000044475
1429708_at	0.4179	Ndufa11	NADH dehydrogenase (ubiquinone) 1 alpha subcomplex 11	69875	ENSMUSG00000002379
1426533_at	0.4832	Nop56	NOP56 ribonucleoprotein homolog (yeast)	67134	ENSMUSG00000027405
1416367_at	0.4954	1110001J03Rik	RIKEN cDNA 1110001J03 gene	66117	ENSMUSG00000019689
1431962_a_at	0.4724	Stambp	STAM binding protein	70527	ENSMUSG00000006906
1416317_a_at	0.4315	Stambp	STAM binding protein	70527	ENSMUSG00000006906
1455288_at	0.538	Leprel4	leprecan-like 4	66180	ENSMUSG00000006931
1450895_a_at	0.3889	Cox16	COX16 cytochrome c oxidase assembly homolog (S. cerevisiae)	66272	ENSMUSG00000091803
1417427_at	0.3861	Rnaseh2c	ribonuclease H2, subunit C	68209	ENSMUSG00000024925
1450711_at	-0.4661	Brd4	bromodomain containing 4	57261	ENSMUSG00000024002
1430075_at	-0.3945	Sf3b3	splicing factor 3b, subunit 3	101943	ENSMUSG00000033732
1418963_at	-0.3972	Fam188a	family with sequence similarity 188, member A	66960	ENSMUSG00000026767
1417515_at	0.3963	Lsm10	U7 snRNP-specific Sm-like protein LSM10	116748	ENSMUSG00000050188
1442514_a_at	-0.3877	Ell3	elongation factor RNA polymerase II-like 3	269344	ENSMUSG00000027246
1422919_at	0.3889	Hrasls	HRAS-like suppressor	27281	ENSMUSG00000022525
1436415_at	0.4015	Med29	mediator complex subunit 29	67224	ENSMUSG00000003444
1423413_at	0.4041	Ndrg1	N-myc downstream regulated gene 1	17988	ENSMUSG00000005125
1450976_at	0.4192	Ndrg1	N-myc downstream regulated gene 1	17988	ENSMUSG00000005125
1437972_s_at	0.3853	Sf3b5	splicing factor 3b, subunit 5	66125	ENSMUSG00000078348
1451185_at	0.4157	Sf3b5	splicing factor 3b, subunit 5	66125	ENSMUSG00000078348
1458285_at	-0.4474	Gria1	glutamate receptor, ionotropic, AMPA1 (alpha 1)	14799	ENSMUSG00000020524
1448274_at	0.405	C1qbp	complement component 1, q subcomponent binding protein	12261	ENSMUSG00000018446
1428964_at	0.4281	Slc25a18	solute carrier family 25 (mitochondrial carrier), member 18	71803	ENSMUSG00000004902
1416245_at	0.4012	Aurkaip1	aurora kinase A interacting protein 1	66077	ENSMUSG00000065990
1424732_s_at	0.5224	Tmem192	transmembrane protein 192	73067	ENSMUSG00000025521
1454641_at	-0.413	Cggbp1	CGG triplet repeat binding protein 1	106143	ENSMUSG00000054604
1447909_s_at	0.4421	Selk	selenoprotein K	80795	ENSMUSG00000042682
1423225_at	0.4004	Selk	selenoprotein K	80795	ENSMUSG00000042682
1435074_at	-0.4147	Tmem106b	transmembrane protein 106B	71900	ENSMUSG00000029571
1456867_x_at	0.4073	Ergic3	ERGIC and golgi 3	66366	ENSMUSG00000005881
1423548_s_at	0.4287	Ergic3	ERGIC and golgi 3	66366	ENSMUSG00000005881
1424970_at	-0.4623	Purg	purine-rich element binding protein G	75029	ENSMUSG00000049184
1417605_s_at	0.4011	Camk1	calcium/calmodulin-dependent protein kinase I	52163	ENSMUSG00000030272
1417604_at	0.3946	Camk1	calcium/calmodulin-dependent protein kinase I	52163	ENSMUSG00000030272
1448154_at	0.4399	Ndrg2	N-myc downstream regulated gene 2	29811	ENSMUSG00000004558
1454892_at	-0.4159	Pitpnb	phosphatidylinositol transfer protein, beta	56305	ENSMUSG00000050017
1434257_s_at	-0.4175	Pitpnb	phosphatidylinositol transfer protein, beta	56305	ENSMUSG00000050017
1423840_at	0.4437	Coa3	cytochrome C oxidase assembly factor 3	52469	ENSMUSG00000017188
1460360_at	0.3927	Asrgl1	asparaginase like 1	66514	ENSMUSG00000024654
1448699_at	0.4656	Mrpl54	mitochondrial ribosomal protein L54	66047	ENSMUSG00000034932
1416212_at	0.4508	Magoh	mago-nashi homolog, proliferation-associated (Drosophila)	17149	ENSMUSG00000028609
1416593_at	0.4554	Glrx	glutaredoxin	93692	ENSMUSG00000021591
1456243_x_at	-0.4024	Mcl1	myeloid cell leukemia sequence 1	17210	ENSMUSG00000038612
1437527_x_at	-0.4303	Mcl1	myeloid cell leukemia sequence 1	17210	ENSMUSG00000038612
1416583_at	0.4059	Bad	BCL2-associated agonist of cell death	12015	ENSMUSG00000024959
1422449_s_at	0.391	Rcn2	reticulocalbin 2	26611	ENSMUSG00000032320
1421970_a_at	-0.4056	Gria2	glutamate receptor, ionotropic, AMPA2 (alpha 2)	14800	ENSMUSG00000033981
1451650_at	0.4141	Ddo	D-aspartate oxidase	70503	ENSMUSG00000063428
1416994_at	0.5115	Ttc1	tetratricopeptide repeat domain 1	66827	ENSMUSG00000041278
1426187_a_at	0.4107	Hax1	HCLS1 associated X-1	23897	ENSMUSG00000027944
1416335_at	0.4628	Mif	macrophage migration inhibitory factor	17319	ENSMUSG00000033307
1448677_at	0.4366	Emc8	ER membrane protein complex subunit 8	18117	ENSMUSG00000031819
1417421_at	0.4717	S100a1	S100 calcium binding protein A1	20193	ENSMUSG00000044080
1436121_a_at	0.3935	Nsmce1	non-SMC element 1 homolog (S. cerevisiae)	67711	ENSMUSG00000030750
1416951_a_at	-0.4038	Atp6v1d	ATPase, H+ transporting, lysosomal V1 subunit D	73834	ENSMUSG00000021114
1423544_at	0.3861	Ptpn5	protein tyrosine phosphatase, non-receptor type 5	19259	ENSMUSG00000030854
1437473_at	-0.525	Maf	avian musculoaponeurotic fibrosarcoma (v-maf) AS42 oncogene homolog	17132	ENSMUSG00000055435
1422976_x_at	0.4927	Ndufa7	NADH dehydrogenase (ubiquinone) 1 alpha subcomplex, 7 (B14.5a)	66416	ENSMUSG00000041881
1455749_x_at	0.4688	Ndufa7	NADH dehydrogenase (ubiquinone) 1 alpha subcomplex, 7 (B14.5a)	66416	ENSMUSG00000041881
1428360_x_at	0.527	Ndufa7	NADH dehydrogenase (ubiquinone) 1 alpha subcomplex, 7 (B14.5a)	66416	ENSMUSG00000041881
1450818_a_at	0.4138	Ndufa7	NADH dehydrogenase (ubiquinone) 1 alpha subcomplex, 7 (B14.5a)	66416	ENSMUSG00000041881
1436567_a_at	0.5276	Ndufa7	NADH dehydrogenase (ubiquinone) 1 alpha subcomplex, 7 (B14.5a)	66416	ENSMUSG00000041881
1449025_at	0.3849	Ifit3	interferon-induced protein with tetratricopeptide repeats 3	15959	ENSMUSG00000074896
1418002_at	0.479	Higd2a	HIG1 domain family, member 2A	67044	ENSMUSG00000025868
1416849_at	0.4703	Cisd1	CDGSH iron sulfur domain 1	52637	ENSMUSG00000037710
1415744_at	0.4057	H2-Ke2	H2-K region expressed gene 2	14976	ENSMUSG00000024309
1419428_a_at	0.4187	Gaa	glucosidase, alpha, acid	14387	ENSMUSG00000025579
1455061_a_at	0.4767	Acaa2	acetyl-Coenzyme A acyltransferase 2 (mitochondrial 3-oxoacyl-Coenzyme A thiolase)	52538	ENSMUSG00000036880
1416766_at	0.3961	Mosc2	MOCO sulphurase C-terminal domain containing 2	67247	ENSMUSG00000073481
1442549_at	-0.4167	Mbnl3	muscleblind-like 3 (Drosophila)	171170	ENSMUSG00000036109
1429776_a_at	0.4103	Dnajb6	DnaJ (Hsp40) homolog, subfamily B, member 6	23950	ENSMUSG00000029131
1416093_a_at	0.5553	Mrpl20	mitochondrial ribosomal protein L20	66448	ENSMUSG00000029066
1439777_at	-0.4144	Celf2	CUGBP, Elav-like family member 2	14007	ENSMUSG00000002107
1452874_at	-0.4189	2510003E04Rik	RIKEN cDNA 2510003E04 gene	72320	ENSMUSG00000036955
1417593_at	0.4398	Tusc2	tumor suppressor candidate 2	80385	ENSMUSG00000010054
1429709_at	0.3934	Pmpcb	peptidase (mitochondrial processing) beta	73078	ENSMUSG00000029017
1422694_at	0.4001	Ttyh1	tweety homolog 1 (Drosophila)	57776	ENSMUSG00000030428
1450048_a_at	0.4154	Idh2	isocitrate dehydrogenase 2 (NADP+), mitochondrial	269951	ENSMUSG00000030541
1455713_x_at	-0.4264	Phb2	prohibitin 2	12034	ENSMUSG00000004264
1445440_at	-0.4	Ccdc88a	coiled coil domain containing 88A	108686	ENSMUSG00000032740
1416553_at	0.5558	Stra13	stimulated by retinoic acid 13	20892	ENSMUSG00000025144
1451377_a_at	0.4174	Aaas	achalasia, adrenocortical insufficiency, alacrimia	223921	ENSMUSG00000036678
1427578_a_at	0.4229	Eif6	eukaryotic translation initiation factor 6	16418	ENSMUSG00000027613
1422491_a_at	0.4349	Bnip2	BCL2/adenovirus E1B interacting protein 2	12175	ENSMUSG00000011958
1453993_a_at	0.487	Bnip2	BCL2/adenovirus E1B interacting protein 2	12175	ENSMUSG00000011958
1437909_at	0.4128	Srcap	Snf2-related CREBBP activator protein	100043597	NULL
1433938_at	0.475	Trp53bp2	transformation related protein 53 binding protein 2	209456	ENSMUSG00000026510
1449343_s_at	0.388	Sin3a	transcriptional regulator, SIN3A (yeast)	20466	ENSMUSG00000042557
1423299_at	0.4198	Txnl1	thioredoxin-like 1	53382	ENSMUSG00000024583
1418185_at	0.5046	Ndufaf3	NADH dehydrogenase (ubiquinone) 1 alpha subcomplex, assembly factor 3	66706	ENSMUSG00000070283
1425599_a_at	0.4583	Gatad1	GATA zinc finger domain containing 1	67210	ENSMUSG00000007415
1434159_at	-0.4204	Stk4	serine/threonine kinase 4	58231	ENSMUSG00000018209
1428254_at	-0.4264	Purb	purine rich element binding protein B	19291	ENSMUSG00000094483
1424889_at	0.3996	Nupl2	nucleoporin like 2	231042	ENSMUSG00000048439
1418228_at	0.4644	Nfu1	NFU1 iron-sulfur cluster scaffold homolog (S. cerevisiae)	56748	ENSMUSG00000029993
1416220_at	0.4053	Spcs1	signal peptidase complex subunit 1 homolog (S. cerevisiae)	69019	ENSMUSG00000021917
1460181_at	0.3966	Stmn3	stathmin-like 3	20262	ENSMUSG00000027581
1416764_at	0.4158	Fis1	fission 1 (mitochondrial outer membrane) homolog (yeast)	66437	ENSMUSG00000019054
1448971_at	0.441	2410022L05Rik	RIKEN cDNA 2410022L05 gene	66423	ENSMUSG00000031458
1448387_at	0.3943	Rbx1	ring-box 1	56438	ENSMUSG00000022400
1443843_x_at	-0.4012	Rpl9	ribosomal protein L9	20005	ENSMUSG00000047215
1437064_at	-0.4398	Ar	androgen receptor	11835	ENSMUSG00000046532
1432462_a_at	0.474	Med27	mediator complex subunit 27	68975	ENSMUSG00000026799
1433915_s_at	-0.463	Epn2	epsin 2	13855	ENSMUSG00000001036
1415677_at	0.3874	Dhrs1	dehydrogenase/reductase (SDR family) member 1	52585	ENSMUSG00000002332
1451164_a_at	0.5042	Mrps18b	mitochondrial ribosomal protein S18B	66973	ENSMUSG00000024436
1448718_at	0.4361	Lamtor1	late endosomal/lysosomal adaptor, MAPK and MTOR activator 1	66508	ENSMUSG00000030842
1427921_s_at	0.4227	2310061C15Rik	RIKEN cDNA 2310061C15 gene	66531	ENSMUSG00000014633
1437331_a_at	-0.4151	Arf3	ADP-ribosylation factor 3	11842	ENSMUSG00000051853
1422879_at	0.409	Sypl	synaptophysin-like protein	19027	ENSMUSG00000020570
1448905_at	0.4337	Nme3	NME/NM23 nucleoside diphosphate kinase 3	79059	ENSMUSG00000073435
1452341_at	0.433	Echs1	enoyl Coenzyme A hydratase, short chain, 1, mitochondrial	93747	ENSMUSG00000025465
1452026_a_at	0.4353	Pla2g12a	phospholipase A2, group XIIA	66350	ENSMUSG00000027999
1421872_at	0.4076	Rab24	RAB24, member RAS oncogene family	19336	ENSMUSG00000034789
1421873_s_at	0.4295	Rab24	RAB24, member RAS oncogene family	19336	ENSMUSG00000034789
1429079_a_at	0.442	Mef2b	myocyte enhancer factor 2B	17259	ENSMUSG00000002345,ENSMUSG00000079033
1426373_at	-0.4173	Ski	ski sarcoma viral oncogene homolog (avian)	20481	ENSMUSG00000029050
1452173_at	0.4082	Hadha	hydroxyacyl-Coenzyme A dehydrogenase/3-ketoacyl-Coenzyme A thiolase/enoyl-Coenzyme A hydratase (trifunctional protein), alpha subunit	97212	ENSMUSG00000025745
1436180_at	-0.4146	Dnajc5	DnaJ (Hsp40) homolog, subfamily C, member 5	13002	ENSMUSG00000000826
1423372_at	0.4309	Pole4	polymerase (DNA-directed), epsilon 4 (p12 subunit)	66979	ENSMUSG00000030042
1423409_a_at	0.3984	Chtop	chromatin target of PRMT1	66511	ENSMUSG00000001017
cellular component	membrane-bounded organelle	GO:0043227
C=8055;O=250;E=180.37;R=1.39;rawP=2.64e-13;adjP=1.10e-11
Probe Set ID	R	Gene Symbol	Description	Entrez ID	Ensemble Gene Stable ID
1419536_a_at	0.3952	Rela	v-rel reticuloendotheliosis viral oncogene homolog A (avian)	19697	ENSMUSG00000024927
1450683_at	0.4041	Tagln3	transgelin 3	56370	ENSMUSG00000022658
1448524_s_at	0.5505	Ssr4	signal sequence receptor, delta	20832	ENSMUSG00000002014
1448003_at	0.4784	1810043H04Rik	RIKEN cDNA 1810043H04 gene	208501	ENSMUSG00000078572
1438443_at	-0.4463	Zbtb20	zinc finger and BTB domain containing 20	56490	ENSMUSG00000022708
1451088_a_at	0.4332	Oxa1l	oxidase assembly 1-like	69089	ENSMUSG00000000959
1456170_x_at	-0.3981	Calr	calreticulin	12317	ENSMUSG00000003814
1417606_a_at	-0.4667	Calr	calreticulin	12317	ENSMUSG00000003814
1428515_at	0.4139	Zswim7	zinc finger, SWIM-type containing 7	69747	ENSMUSG00000014243
1417010_at	-0.385	Zfp238	zinc finger protein 238	30928	ENSMUSG00000063659
1417999_at	-0.4163	Itm2b	integral membrane protein 2B	16432	ENSMUSG00000022108
1435991_at	-0.4158	Nr3c2	nuclear receptor subfamily 3, group C, member 2	110784	ENSMUSG00000031618
1433520_at	-0.4331	Scap	SREBF chaperone	235623	ENSMUSG00000032485
1460725_at	0.3976	Xpa	xeroderma pigmentosum, complementation group A	22590	ENSMUSG00000028329
1434370_s_at	0.3945	Faf1	Fas-associated factor 1	14084	ENSMUSG00000010517
1417287_at	0.4165	H13	histocompatibility 13	14950	ENSMUSG00000019188
1450405_at	0.417	Mrpl19	mitochondrial ribosomal protein L19	56284	ENSMUSG00000030045
1417918_at	0.4001	Mrpl11	mitochondrial ribosomal protein L11	66419	ENSMUSG00000024902
1448286_at	0.4051	Hsd17b10	hydroxysteroid (17-beta) dehydrogenase 10	15108	ENSMUSG00000025260
1453564_a_at	0.3954	Chmp3	charged multivesicular body protein 3	66700	ENSMUSG00000053119
[truncated: 2,272 more rows]
