# Supplementary material for: The Genetic Architecture of Murine Glutathione Transferases
Source: PLoS One. 2016 Feb 1;11(2):e0148230. doi: 10.1371/journal.pone.0148230 (PMC4734686; doi:10.1371/journal.pone.0148230)
Supplement: S7 Table — All have partial r (p-value) < 0.001 and literature (lit) r > 0.5. Below background expression is shaded. (XLSX) [file pone.0148230.s013.xlsx]

## Sheet: S7 Table
S7 Table. Partial correlates of Gsto1 in the hippocampus and literature co-citations. All have partial r (p-value) < 0.001 and lit r > 0.5. Below background expression is shaded.
Record	Gene ID	Symbol	Description	Chr	Megabase	Mean Expr	N	Sample Partial r	Sample p(partial r)	Sample r	Sample p(r)	delta r	Lit Corr	Tissue r	Tissue p(r)	AD & FTDM DB	ALZGENE	Chilibot	Pubmed
1416531_at	14873	Gsto1	glutathione S-transferase omega 1 (Alzheimer disease risk factor)	19	47.9388	10.6282	67	1	0	1	0	0	1	1	0	Yes	Yes	Chilibot (6)	Verified
1420636_a_at	80915	Dusp12	dual specificity phosphatase 12	1	172.81	9.06311	67	0.558822	8.86478e-08	0.270157	0.0270354	0.289	0.579	-0.245	0.227
1423225_at	20342	Selk	selenoprotein K	14	30.785	11.6525	67	0.556067	1.09404e-07	0.476814	4.51927e-05	0.079	0.527	-0.189	0.356
1422517_a_at	66136	Znrd1	zinc ribbon domain containing, 1	17	37.0915	10.1044	67	0.551064	1.59175e-07	0.325206	0.00724764	0.226	0.524	-0.157	0.443
1423710_at	78920	Dlst	dihydrolipoamide S-succinyltransferase (E2 component of 2-oxo-glutarate complex)	12	86.4745	11.0634	67	0.53028	6.88982e-07	0.233759	0.0569281	0.297	0.596	0.069	0.738		Yes	Chilibot parallel relationship	Verified
1422558_at	14431	Gamt	guanidinoacetate methyltransferase	10	79.721	8.62418	67	0.52925	7.38186e-07	0.201649	0.101763	0.328	0.528	-0.174	0.396
1419737_a_at	16828	Ldh1	lactate dehydrogenase 1, A chain	7	54.1104	12.5079	67	0.520635	1.2975e-06	0.0981964	0.429201	0.422	0.546	N/A	N/A
1455699_at	12035	Bcat1	branched chain aminotransferase 1, cytosolic	6	144.942	9.58978	67	0.505227	3.37134e-06	0.257909	0.0351057	0.247	0.586	0.113	0.583
1450380_at	105298	Epdr1	ependymin related protein 1 (upregulated in colorectal cancer gene 1); all three exons 3' UTR	13	19.684	11.4591	67	0.50336	3.76814e-06	0.186578	0.130592	0.317	0.564	0.14	0.496
1439652_at	20342	Selenbp2	selenium binding protein 2	11	117.525	10.2332	67	-0.50203	4.07668e-06	-0.33951	0.00494307	-0.163	0.527	0.352	0.077
1428440_at	78830	Slc25a12	solute carrier family 25 (mitochondrial carrier, Aralar), member 12	2	71.1129	11.4183	67	0.501294	4.25718e-06	0.366793	0.00226568	0.135	0.564	0.264	0.193			Chilibot Abstract co-ocurrence	Not Verified
1457155_at	11669	Aldh2	aldehyde dehydrogenase 2, mitochondrial	5	122.016	6.85576	67	0.497805	5.21831e-06	0.305987	0.0117958	0.192	0.6	0.176	0.39		Yes	Chilibot parallel relationship	Verified
1439163_at	99003	4732486I23Rik	RIKEN cDNA 4732486I23 gene	9	48.4624	11.6309	67	-0.489001	8.60245e-06	-0.36478	0.0024055	-0.124	0.578	N/A	N/A
1453582_at	12660	Chka	choline kinase alpha	19	3.87137	9.24216	67	-0.487304	9.45167e-06	-0.279848	0.0218146	-0.207	0.596	-0.217	0.288
1415673_at	100678	Psph	phosphoserine phosphatase	5	130.271	9.291	67	0.481064	1.32817e-05	0.324062	0.00746723	0.157	0.528	-0.113	0.582
1452770_at	27973	Vkorc1	vitamin K epoxide reductase complex, subunit 1 (blood clotting, resistance to warfarin)	7	135.037	10.6137	67	0.478898	1.49143e-05	0.305234	0.0120156	0.174	0.654	0.17	0.407
1444827_at	224671	Btbd9	BTB/POZ domain-containing protein 9 (restless leg syndrome candidate)	17	30.6184	8.60395	67	-0.478754	1.50294e-05	-0.359808	0.00278446	-0.119	0.582	-0.205	0.314
1416137_at	11750	Anxa7	annexin A7	14	21.2746	9.67111	67	0.476934	1.65518e-05	0.293491	0.0159324	0.183	0.516	0.527	0.006
1437679_a_at	69367	Glrx2	glutaredoxin 2 (thioltransferase)	1	145.589	10.5017	67	0.476626	1.68231e-05	0.196408	0.111166	0.28	0.538	-0.249	0.22
1422579_at	15528	Hspe1	heat shock protein 1 (chaperonin 10)	1	55.1451	10.0408	67	0.474826	1.84925e-05	0.289482	0.0174995	0.185	0.536	-0.004	0.986
1415870_at	12321	Calu	calumenin	6	29.3261	10.4464	67	0.474248	1.90595e-05	0.26474	0.0303877	0.21	0.629	0.407	0.039
1424556_at	209027	Pycr1	pyrroline-5-carboxylate reductase 1	11	120.501	6.0404	67	0.47355	1.97667e-05	0.327572	0.00681136	0.146	0.553	0.019	0.926			Chilibot Abstract co-ocurrence	Not Verified
1448148_at	14824	Grn	granulin	11	102.297	10.0245	67	0.473182	2.01481e-05	0.296859	0.0147105	0.176	0.521	0.173	0.399		Yes	Chilibot (3) neutral	Verified
1418045_at	16329	Inpp1	inositol polyphosphate-1-phosphatase	1	52.8463	8.50941	67	0.468039	2.62455e-05	0.221235	0.0719916	0.247	0.606	-0.435	0.026
1421914_s_at	56284	Mrpl19	mitochondrial ribosomal protein L19	6	81.9118	9.66451	67	0.467194	2.73958e-05	0.28357	0.0200508	0.184	0.54	-0.186	0.362
1450871_a_at	12035	Bcat1	branched chain aminotransferase 1, cytosolic (hypervalinemia and hyperleucine-isoleucinemia)	6	144.948	10.704	67	0.465213	3.02734e-05	0.19496	0.113879	0.27	0.586	0.113	0.583
1419270_a_at	110074	Dut	deoxyuridine triphosphatase	2	125.077	8.28261	67	0.464672	3.11077e-05	0.357199	0.00300393	0.107	0.529	-0.155	0.45			Chilibot Abstract co-ocurrence	Not Verified
1416448_at	16434	Itpa	inosine triphosphatase (nucleoside triphosphate pyrophosphatase)	2	130.507	9.41535	67	0.463889	3.23492e-05	0.218069	0.0762651	0.246	0.726	0.215	0.291
1442833_at	11732	Ank	progressive ankylosis	15	27.4392	5.81689	67	-0.459396	4.04006e-05	-0.190715	0.122124	-0.269	0.506	0.463	0.017
1433972_at	100072	Camta1	calmodulin binding transcription activator 1 (human 1p36.31-p36.23 candidate tumor suppressor genes of neuroblastoma)	4	150.436	12.9149	67	-0.458959	4.12754e-05	-0.252341	0.0393896	-0.207	0.545	0.189	0.354
1459630_at	244667	Disc1	disrupted in schizophrenia 1	8	127.789	6.74932	67	0.457286	4.47814e-05	0.182052	0.140355	0.275	0.522	0.135	0.512			Chilibot Abstract co-ocurrence	Verified
1450969_at	66904	Pccb	propionyl Coenzyme A carboxylase, beta polypeptide	9	100.883	10.0218	67	0.456188	4.72283e-05	0.254285	0.0378469	0.202	0.521	0.221	0.277
1442277_at	12660	Chka	choline kinase alpha	19	3.86532	8.33951	67	-0.454905	5.02403e-05	-0.244034	0.0465789	-0.211	0.596	-0.217	0.288
1425129_a_at	21351	Taldo1	transaldolase 1 (multiple sclerosis)	7	148.588	10.9745	67	0.453777	5.30333e-05	0.308513	0.0110835	0.145	0.617	0.263	0.194
1452691_at	76938	Rbm17	RNA binding motif protein 17	2	11.5071	10.3581	67	0.451727	5.84755e-05	0.351227	0.00356511	0.1	0.514	-0.371	0.062
1448215_a_at	75221	Dpp3	dipeptidylpeptidase 3	19	4.90728	8.48005	67	0.451247	5.98198e-05	0.155218	0.209761	0.296	0.504	0.266	0.188
1447176_at	77938	A930008G19Rik	RIKEN cDNA A930008G19 gene	7	139.943	6.76756	67	-0.450714	6.13477e-05	-0.277595	0.0229446	-0.173	0.502	0.01	0.961
1419254_at	17768	Mthfd2	methylenetetrahydrofolate dehydrogenase (NAD+ dependent), methenyltetrahydrofolate cyclohydrolase	6	83.259	7.26684	67	0.449721	6.42852e-05	0.212544	0.0842042	0.237	0.548	-0.37	0.063
1459363_at	20239	Atxn2	ataxin 2	5	122.245	9.16076	67	-0.449341	6.54452e-05	-0.15157	0.220805	-0.298	0.516	-0.097	0.636
1441858_at	80914	Uck2	uridine-cytidine kinase 2	1	169.189	6.95267	67	-0.448649	6.76026e-05	-0.185936	0.131944	-0.263	0.53	-0.174	0.395
1452823_at	76263	GSTK1	glutathione S-transferase kappa 1	6	42.1975	8.76883	67	0.448546	6.79286e-05	0.419208	0.000414102	0.029	0.754	0.185	0.366
1439801_at	194974	Sunc1	Sad1 and UNC84 domain containing 1	11	8.9161	5.45999	67	0.446899	7.33518e-05	0.409631	0.000576902	0.037	0.571	-0.372	0.061
1424018_at	15254	Hint1	histidine triad nucleotide binding protein 1	11	54.68	13.1447	67	0.446809	7.36608e-05	0.29904	0.0139628	0.148	0.541	0.198	0.331			Chilibot Abstract co-ocurrence	Not Verified
1426481_at	23925	Kelchl	Kell blood group	16	17.793	11.8098	67	0.446495	7.47435e-05	0.333684	0.00578908	0.113	0.544	N/A	N/A
1420796_at	11624	Ahrr	aryl-hydrocarbon receptor repressor	13	74.3486	5.40145	67	0.445585	7.79583e-05	0.0770833	0.535255	0.369	0.579	0.505	0.009
1423159_at	13382	Dld	dihydrolipoamide dehydrogenase	12	32.017	10.8501	67	0.445489	7.83063e-05	0.262445	0.0319098	0.183	0.544	-0.06	0.771		Yes	Chilibot Abstract co-ocurrence	Verified
1427078_at	102607	Snx19	sorting nexin 19	9	30.2728	10.8274	67	0.445239	7.92171e-05	0.204229	0.0973679	0.241	0.55	-0.021	0.918
1424172_at	14651	Hagh	hydroxyacyl glutathione hydrolase	17	24.9979	11.1223	67	0.444723	8.11237e-05	0.249244	0.0419535	0.195	0.592	-0.379	0.056
1448119_at	12183	Bpgm	2,3-bisphosphoglycerate mutase	6	34.4376	10.3111	67	0.444427	8.22363e-05	0.234103	0.0565534	0.21	0.502	-0.091	0.657
1437398_a_at	56752	Aldh9a1	aldehyde dehydrogenase 9, subfamily A1 (GABA enzyme)	1	169.298	9.19251	67	0.444401	8.23334e-05	0.243923	0.0466814	0.2	0.502	-0.2	0.328
1457799_at	238076	Kcns3	potassium voltage-gated channel, delayed-rectifier, subfamily S, member 3	12	11.0984	8.14873	67	0.441892	9.23527e-05	0.190529	0.122497	0.251	0.525	0.007	0.972
1440324_at	56284	Mrpl19	mitochondrial ribosomal protein L19	6	81.9098	8.21091	67	0.441597	9.35987e-05	0.121214	0.328513	0.32	0.54	-0.186	0.362
1417125_at	269378	Ahcy	S-adenosylhomocysteine hydrolase	2	154.886	9.68336	67	0.441221	9.52089e-05	0.26485	0.0303161	0.176	0.619	0.011	0.956
1450405_at	56284	Mrpl19	mitochondrial ribosomal protein L19 (39S subunit protein)	6	81.9124	9.26207	67	0.440663	9.76497e-05	0.240426	0.0500211	0.2	0.54	-0.186	0.362
1457584_at	226551	AI848100	expressed sequence AI848100	1	163.746	4.86679	67	0.440643	9.77362e-05	0.323722	0.00753373	0.117	0.578	-0.335	0.095
1428729_at	79264	Krit1	KRIT1, ankyrin repeat containing (cerebral cavernous malformations 1)	5	3.80379	9.96414	67	-0.439877	0.000101181	-0.280549	0.0214725	-0.159	0.512	-0.027	0.895			Chilibot Abstract co-ocurrence	Not Verified
1451149_at	72157	Pgm2	phosphoglucomutase 2	4	99.6593	10.213	67	0.438351	0.000108372	0.250337	0.0410331	0.188	0.608	0.271	0.18			Chilibot Abstract co-ocurrence	Not Verified
1444670_at	69726	Smyd3	SET and MYND domain containing 3	1	181.168	6.93406	67	-0.436995	0.000115148	-0.378751	0.00157493	-0.058	0.606	0.007	0.974
1419072_at	68312	Gstm7	glutathione S-transferase, mu 7 (susceptibility to carcinogens and toxins)	3	107.73	9.79526	67	0.436838	0.00011596	0.20698	0.0928459	0.23	0.539	-0.234	0.251			Chilibot (1) neutral	Not Verified
1418204_s_at	11629	Aif1	allograft inflammatory factor 1 (microglial expression signature)	17	35.308	7.87857	67	0.436191	0.000119344	0.430824	0.000273311	0.005	0.506	-0.542	0.004			Chilibot Abstract co-ocurrence	Verified
1431173_at	77938	Fam53b	family with sequence similarity 53, member B (human 10q26.13, LOC77938, ARMD candidate gene)	7	139.951	7.4927	67	-0.435376	0.000123739	-0.123507	0.319377	-0.312	0.502	N/A	N/A
1421145_at	13521	Slc26a2	solute carrier family 26 (sulfate transporter), member 2	18	61.3566	7.9564	67	-0.435372	0.000123762	-0.303803	0.0124433	-0.132	0.524	0.483	0.012
1416283_at	14450	Gart	phosphoribosylglycinamide formyltransferase	16	91.6218	9.11287	67	0.435319	0.000124051	0.1967	0.110626	0.239	0.572	-0.048	0.816			Chilibot (23) neutral	Verified
1441829_s_at	56697	Akap10	A kinase (PRKA) anchor protein 10	11	61.7102	7.53982	67	-0.434591	0.000128114	-0.325532	0.00718614	-0.109	0.636	-0.014	0.945
1422428_at	67573	Lpd	lysyl oxidase-like 4	9	54.453	9.88546	67	0.434588	0.000128129	0.280282	0.0216021	0.154	0.501	N/A	N/A			Chilibot parallel relationship	Verified
1420502_at	20229	Sat1	spermidine/spermine N1-acetyl transferase 1	X	151.648	9.71992	67	0.433224	0.000136061	0.246316	0.0445039	0.187	0.54	0.13	0.528
1426289_at	23918	Impdh2	inosine 5'-phosphate dehydrogenase 2	9	108.462	11.83	67	0.432478	0.000140583	0.0889317	0.474203	0.344	0.611	-0.069	0.736
1450720_at	11431	Acp1	acid phosphatase 1, soluble	12	31.5805	9.6533	67	0.431977	0.000143695	0.228087	0.0633985	0.204	0.655	-0.155	0.45			Chilibot (2) inhibitory	Verified
1448330_at	14862	Gstm1	glutathione S-transferase, mu 1	3	107.815	11.9478	67	0.429954	0.000156913	0.0293767	0.813445	0.401	0.633	0.163	0.425		Yes		Verified
1438033_at	11429	Aco2	aconitase 2, mitochondrial	15	81.6467	8.18553	67	-0.429342	0.000161124	-0.173784	0.159593	-0.256	0.559	0.144	0.483
1427282_a_at	14297	Fxn	frataxin	19	24.3363	8.69427	67	0.429187	0.000162204	0.346594	0.00406277	0.083	0.546	0.071	0.73			Chilibot parallel relationship	Verified
1454268_a_at	13057	Cyba	cytochrome b-245, alpha polypeptide	8	124.949	8.30354	67	0.428652	0.000165992	0.350172	0.00367341	0.078	0.544	0.035	0.865
1440033_at	100163	Pag	platelet-activating factor acetylhydrolase 2	3	9.81087	8.44725	67	-0.427207	0.000176625	-0.289095	0.0176578	-0.138	0.572	N/A	N/A			Chilibot (6) inhibitory	Verified
1428253_at	68942	Chmp2b	chromatin modifying protein 2B (charged multivesicular body protein 2b, vacuolar protein sorting 2-2, frontotemporal lobe dementia)	16	65.54	10.2178	67	0.426862	0.00017925	0.103771	0.403335	0.323	0.509	-0.003	0.99	Yes		Chilibot Abstract co-ocurrence	Verified
1440439_at	231986	Jazf1	JAZF zinc finger 1	6	52.9619	8.88109	67	-0.426632	0.000181022	-0.32145	0.00799072	-0.105	0.585	-0.017	0.933
1417137_at	80914	Uck2	uridine-cytidine kinase 2	1	169.155	6.79787	67	-0.42602	0.000185812	-0.221893	0.0711282	-0.204	0.53	-0.174	0.395
1423630_at	114886	Cygb	cytoglobin (hippocampal DG expression signature)	11	116.508	9.99344	67	-0.424638	0.00019705	-0.284165	0.0197807	-0.14	0.514	0.52	0.006			Chilibot Abstract co-ocurrence	Verified
1456822_at	19359	Rad23b	RAD23b homolog (S. cerevisiae)	4	55.3809	6.4558	67	-0.424179	0.000200917	-0.239759	0.0506794	-0.184	0.537	0.044	0.829
1418311_at	63828	Fn3k	fructosamine 3 kinase	11	121.31	9.08631	67	0.423142	0.000209903	0.36633	0.00229719	0.057	0.536	0.003	0.988
1423701_at	71743	Coasy	Coenzyme A synthase	11	100.947	8.4042	67	0.422985	0.000211293	0.210689	0.0870118	0.212	0.545	-0.127	0.537			Chilibot Abstract co-ocurrence	Verified
1437759_at	56421	Pfkp	phosphofructokinase, platelet (type C)	13	6.58852	8.36299	67	-0.422868	0.000212337	-0.232124	0.0587356	-0.191	0.576	0.547	0.004			Chilibot Abstract co-ocurrence	Not Verified
1422849_a_at	54196	Pabpn1	polyadenylate-binding protein 2	14	55.5169	12.8176	67	-0.422202	0.000218362	-0.322947	0.00768685	-0.099	0.508	-0.459	0.018			Chilibot (3) neutral	Not Verified
1415864_at	12183	Bpgm	2,3-bisphosphoglycerate mutase	6	34.4545	9.77386	67	0.420646	0.000233049	0.336251	0.00540181	0.084	0.502	-0.091	0.657
1429778_at	71648	Optn	optineurin (glaucoma)	2	4.94236	7.9692	67	0.420015	0.000239248	0.226138	0.0657537	0.194	0.506	0.022	0.915		Yes		Verified
1458884_at	101476	Plekha1	pleckstrin homology domain containing, family A (phosphoinositide binding specific) member 1	7	138.051	7.06761	67	-0.41943	0.00024513	-0.265548	0.0298664	-0.154	0.547	0.343	0.086
1441315_s_at	116914	Slc19a2	solute carrier family 19 (thiamine transporter), member 2	1	166.195	6.09167	67	0.418642	0.000253266	0.148554	0.230235	0.27	0.528	0.185	0.367
1437044_a_at	14466	Gba	glucosidase, beta, acid (glucocerebrosidase, glucosylceramidase)	3	89.0125	9.41016	67	0.418396	0.000255857	0.217457	0.0771139	0.201	0.592	0.348	0.082		Yes	Chilibot (5) neutral	Verified
1417952_at	13110	Cyp2j6	cytochrome P450, family 2, subfamily j, polypeptide 6 (similar to human CYP2J2)	4	96.1846	8.47065	67	0.418141	0.00025856	0.424529	0.000342965	-0.006	0.702	-0.015	0.943
1428323_at	14571	Gpd2	glycerol phosphate dehydrogenase 2, mitochondrial	2	57.2226	12.0546	67	0.418056	0.000259472	0.0407738	0.743212	0.377	0.505	-0.298	0.139
1428580_at	109778	Blvra	biliverdin reductase A	2	126.918	9.25039	67	0.417997	0.000260096	0.36176	0.00262972	0.056	0.566	0.019	0.927			Chilibot (3) stimulative and inhibitory	Verified
1451050_at	107569	Nt5c3	5'-nucleotidase, cytosolic III	6	56.8328	9.67768	67	0.417287	0.000267819	0.323906	0.00749772	0.093	0.571	0.219	0.283			Chilibot parallel relationship	Not Verified
1418503_at	15526	Hspa9a	heat shock protein 9A	18	35.0971	10.3523	67	0.416788	0.000273359	0.310457	0.0105612	0.106	0.525	N/A	N/A			Chilibot (2) neutral	Not Verified
1426545_at	213988	Tnrc6b	trinucleotide repeat containing 6b	15	80.7597	10.3682	67	-0.415564	0.000287406	-0.300657	0.01343	-0.115	0.514	0.361	0.07
1438537_at	14719	Got2	glutamate oxaloacetate transaminase 2, mitochondrial	8	98.4104	8.23527	67	-0.414967	0.000294492	-0.241435	0.049038	-0.174	0.514	0.254	0.211
1423735_a_at	225348	Wdr36	WD repeat domain 36 (primary open angle glaucoma-associated)	18	33.0244	7.69953	67	0.413633	0.000310888	0.280489	0.0215017	0.133	0.532	0.095	0.643
1420678_a_at	50905	Il17rb	interleukin 17 receptor B	14	30.8094	6.54142	67	0.41233	0.000327696	0.0778107	0.531399	0.335	0.504	-0.325	0.106
1452293_at	102607	Snx19	sorting nexin 19	9	30.2737	9.12112	67	0.412187	0.00032958	0.280766	0.0213678	0.131	0.55	-0.021	0.918
1435317_x_at	26443	Psma6	proteasome (prosome, macropain) subunit, alpha type 6	12	56.5191	7.36466	67	0.411948	0.000332774	0.206843	0.0930674	0.205	0.682	-0.217	0.287
1423951_at	68634	Tm2d3	TM2 domain containing 3	7	72.8426	10.2488	67	0.411795	0.000334826	0.308107	0.0111955	0.104	0.557	0.049	0.811
1420832_at	104009	Qscn6	quiescin Q6	1	157.626	8.29949	67	-0.409822	0.000362357	-0.259933	0.033648	-0.15	0.518	N/A	N/A
1415852_at	23918	Impdh2	inosine 5'-phosphate dehydrogenase 2	9	108.467	11.0642	67	0.409585	0.000365798	0.0927884	0.455169	0.317	0.611	-0.069	0.736
1453706_at	80707	Wwox	WW domain-containing oxidoreductase	8	117.407	6.37919	67	-0.409376	0.000368844	-0.263134	0.0314461	-0.146	0.514	-0.2	0.328
1450099_a_at	14466	Gba	glucosidase, beta, acid (glucocerebrosidase, glucosylceramidase)	3	89.0112	9.93071	67	0.408849	0.000376655	0.246882	0.0440007	0.162	0.592	0.348	0.082		Yes	Chilibot (5) neutral	Verified
1424142_at	230233	Ikbkap	inhibitor of kappa light polypeptide enhancer in B-cells, kinase complex-associated protein	4	56.8007	8.20917	67	-0.408673	0.000379304	-0.190855	0.121844	-0.218	0.556	-0.039	0.85
1445032_at	69635	Dapk1	death associated protein kinase 1	13	60.7392	6.81626	67	-0.408356	0.0003841	-0.198425	0.107472	-0.21	0.501	0.232	0.255		Yes	Chilibot Abstract co-ocurrence	Verified
1453124_at	320938	Tnpo3	transportin 3	6	29.4914	9.01536	67	0.408229	0.000386049	0.232063	0.0588038	0.176	0.506	0.04	0.845
1454758_a_at	21807	Tgfb1i4	transforming growth factor beta 1 induced transcript 4	14	76.907	12.4348	67	0.40768	0.00039453	0.258322	0.0348036	0.149	0.501	N/A	N/A
1428598_at	67046	Tbc1d7	TBC1 domain family, member 7	13	43.2501	8.57923	67	0.406531	0.000412815	0.242262	0.0482444	0.164	0.519	-0.063	0.761
1448139_at	170790	Mlc1	megalencephalic leukoencephalopathy with subcortical cysts 1 homolog	15	88.7867	10.9338	67	0.40601	0.000421351	0.231115	0.059874	0.175	0.564	-0.253	0.213
1426475_at	15288	Hmbs	hydroxymethylbilane synthase	9	44.1447	9.11702	67	0.404792	0.000441952	0.212244	0.0846535	0.193	0.559	-0.052	0.802		Yes		Not Verified
1451035_a_at	58810	Akr1a4	aldo-keto reductase family 1, member A4 (aldehyde reductase, homolog of human AKR1A1)	4	116.311	12.9429	67	0.404733	0.000442964	0.332018	0.00605335	0.073	0.544	0.117	0.569
1455636_at	268890	Lsamp	limbic system-associated membrane protein	16	42.1753	10.1404	67	0.404125	0.000453611	0.270883	0.026611	0.133	0.568	0.346	0.083			Chilibot parallel relationship	Not Verified
1419456_at	67880	Dcxr	dicarbonyl L-xylulose reductase	11	120.587	8.93421	67	0.403101	0.000472034	0.430967	0.000271889	-0.028	0.567	0.153	0.456
1416452_at	18242	Oat	ornithine aminotransferase (autosomal dominant gyrate atrophy, glutamate and GABA synthesis)	7	139.749	10.8972	67	0.401762	0.000497152	0.259227	0.0341507	0.143	0.509	0.525	0.006		Yes	Chilibot Abstract co-ocurrence	Not Verified
1428477_at	68626	Elac2	elaC homolog 2 (E. coli)	11	64.8147	9.06438	67	0.401388	0.000504369	0.177047	0.15178	0.224	0.727	0.198	0.332
1423534_at	18567	Pdcd2	programmed cell death 2	17	15.6587	8.68216	67	0.400918	0.000513579	0.371915	0.00194208	0.029	0.52	0.192	0.347
1424182_at	110446	Acat1	acetyl-Coenzyme A acetyltransferase 1	9	53.3899	9.07427	67	0.400439	0.000523114	0.314438	0.00955758	0.086	0.557	0.018	0.931			Chilibot (5) inhibitory	Verified
1455219_at	75764	Giyd2	GIY-YIG domain containing 2 (family with sequence similarity 54, member B)	7	133.833	6.70801	67	0.399491	0.00054247	0.187667	0.12832	0.212	0.545	0.228	0.263
1451405_at	110821	Pcca	propionyl-Coenzyme A carboxylase, alpha polypeptide	14	123.276	10.1542	67	0.399491	0.000542471	0.295537	0.01518	0.104	0.519	-0.017	0.935
1430124_x_at	58810	Akr1a4	aldo-keto reductase family 1, member A4 (aldehyde reductase, homolog of human AKR1A1)	4	116.309	12.8811	67	0.397917	0.000576038	0.246875	0.0440075	0.151	0.544	0.117	0.569
1449981_a_at	17961	Nat2	N-acetyltransferase 2 (arylamine N-acetyltransferase, functional homolog of human NAT1)	8	70.0257	5.63182	67	0.397644	0.000582033	0.385387	0.0012795	0.012	0.669	0.138	0.501		Yes	Chilibot (2) neutral	Verified
1454659_at	320685	Dctd	dCMP deaminase	8	49.2264	7.35394	67	0.396174	0.000615347	0.27331	0.0252321	0.123	0.545	0.253	0.213			Chilibot Abstract co-ocurrence	Not Verified
1428889_at	69113	1810020C19Rik	RIKEN cDNA 1810020C19 gene	2	93.8209	9.04675	67	0.395974	0.000619999	0.182495	0.139377	0.213	0.511	N/A	N/A
1423858_a_at	15360	Hmgcs2	3-hydroxy-3-methylglutaryl-Coenzyme A synthase 2, mitochondrial	3	98.1066	7.84432	67	0.395377	0.000634087	0.260006	0.0335964	0.135	0.544	0.224	0.271			Chilibot (2) inhibitory	Verified
1450541_at	19296	Pvt1	plasmacytoma variant translocation 1 (longrange Myc translocation activator)	15	62.0158	7.39003	67	-0.395141	0.000639747	-0.364211	0.00244642	-0.031	0.525	-0.461	0.018
1416592_at	93692	Glrx1	glutaredoxin 1 (thioltransferase)	13	75.9872	9.45433	67	0.395127	0.000640081	0.204737	0.09652	0.19	0.572	0.386	0.052
1438764_at	11750	Anxa7	annexin A7	14	21.2781	7.9437	67	-0.394053	0.000666382	-0.259032	0.0342906	-0.135	0.516	0.527	0.006
1455525_at	208194	Endogl1	endonuclease G-like 1	9	119.374	8.32446	67	0.393506	0.000680154	0.135074	0.275792	0.258	0.587	-0.015	0.943
1444518_at	20446	St6galnac2	ST6 (alpha-N-acetyl-neuraminyl-2,3-beta-galactosyl-1,3)-N-acetylgalactosaminide alpha-2,6-sialyltransferase 2	11	116.046	7.42092	67	-0.393271	0.000686139	-0.274798	0.0244167	-0.118	0.578	-0.036	0.861
1425798_a_at	19691	Recql	RecQ protein-like	6	142.311	7.27178	67	0.393156	0.000689088	0.204069	0.0976356	0.189	0.503	-0.042	0.837
1439953_at	54128	Pmm2	phosphomannomutase 2	16	8.64473	6.0024	67	-0.392648	0.000702255	-0.111533	0.368886	-0.281	0.512	0.091	0.658
1426756_at	108148	Galnt2	UDP-N-acetyl-alpha-D-galactosamine:polypeptide N-acetylgalactosaminyltransferase 2	8	126.867	10.057	67	-0.391399	0.000735571	-0.172653	0.162368	-0.219	0.527	0.174	0.394			Chilibot Abstract co-ocurrence	Not Verified
1432273_a_at	13349	Dfy	Duffy blood group	1	175.262	10.874	67	0.389073	0.000801392	0.10423	0.40125	0.285	0.551	N/A	N/A
1449050_at	19687	Recc1	replication factor C 1	5	65.6539	8.47295	67	0.388949	0.000805044	0.133405	0.281823	0.256	0.657	N/A	N/A
1449148_a_at	18685	Phtf1	putative homeodomain transcription factor 1	3	103.809	10.0254	67	0.386319	0.000886076	0.130303	0.293262	0.256	0.512	-0.35	0.079
1416069_at	56421	Pfkp	phosphofructokinase, platelet	13	6.58056	11.6156	67	0.38584	0.000901589	0.226732	0.0650278	0.159	0.576	0.547	0.004			Chilibot Abstract co-ocurrence	Not Verified
1435011_x_at	58810	Akr1a4	aldo-keto reductase family 1, member A4 (aldehyde reductase, homolog of human AKR1A1)	4	116.31	13.0002	67	0.385823	0.000902145	0.275305	0.0241442	0.111	0.544	0.117	0.569
1451733_at	14538	Gcnt2	glucosaminyl (N-acetyl) transferase 2, I-branching enzyme	13	41.0545	6.37399	67	0.385617	0.000908913	0.0941683	0.448462	0.291	0.512	0.278	0.169
1448736_a_at	15452	Hprt	hypoxanthine guanine phosphoribosyl transferase	X	50.3743	12.4464	67	0.385197	0.000922814	0.379564	0.00153571	0.006	0.514	N/A	N/A
1417193_at	20656	Sod2	superoxide dismutase 2, mitochondrial	17	13.2063	11.3094	67	0.384235	0.000955354	0.243668	0.0469185	0.141	0.503	0.106	0.605		Yes	Chilibot (3) neutral	Verified
1428387_at	74205	Acsl3	acyl-CoA synthetase long-chain family member 3	1	78.7037	8.51077	67	0.383667	0.000975058	0.320931	0.00809845	0.063	0.511	0.09	0.661
