# Supplementary material for: The Genetic Architecture of Murine Glutathione Transferases
Source: PLoS One. 2016 Feb 1;11(2):e0148230. doi: 10.1371/journal.pone.0148230 (PMC4734686; doi:10.1371/journal.pone.0148230)
Supplement: S9 Table — Shading denotes genes whose expression in the hippocampus is below background (average log2 expression < 7). Lit Corr = literature correlation between the genes listed in the table and Gsto1 based on the NCBI Rif; AD & FTDM DB = Alzheimer and Frontotemporal Dementia Mutation Database; Alzgene = field synopsis of genetic association studies in AD. (XLSX) [file pone.0148230.s015.xlsx]

## Sheet: S9 Table
S9 Table. Co-expression genes share a high co-incidence of literature citations with Gsto1 and AD
Symbol	Record	Sample Partial r	Sample p(partial r)	Lit Corr	AD & FTDM DB	ALZGENE	Chilibot	Pubmed
Acat1	1424182_at	0.4	0.000523	0.56			Yes	Verified
Acp1	1450720_at	0.43	0.000144	0.66			Yes	Verified
Aif1	1418204_s_at	0.44	0.000119	0.51			Yes	Verified
Aldh2	1457155_at	0.5	5.22e-06	0.6		Yes	Yes	Verified
Blvra	1428580_at	0.42	0.00026	0.57			Yes	Verified
Chmp2b	1428253_at	0.43	0.000179	0.51	Yes		Yes	Verified
Coasy	1423701_at	0.42	0.000211	0.55			Yes	Verified
Cygb	1423630_at	-0.42	0.000197	0.51			Yes	Verified
Dapk1	1445032_at	-0.41	0.000384	0.5		Yes	Yes	Verified
Disc1	1459630_at	0.46	4.48e-05	0.52			Yes	Verified
Dld	1423159_at	0.45	7.83e-05	0.54		Yes	Yes	Verified
Dlst	1423710_at	0.53	6.89e-07	0.6		Yes	Yes	Verified
Fxn	1427282_a_at	0.43	0.000162	0.55			Yes	Verified
Gart	1416283_at	0.44	0.000124	0.57			Yes	Verified
Gba	1437044_a_at	0.42	0.000256	0.59		Yes	Yes	Verified
Grn	1448148_at	0.47	2.01e-05	0.52		Yes	Yes	Verified
Gstm1	1448330_at	0.43	0.000157	0.63		Yes		Verified
Gsto1	1416531_at	1	0	1	Yes	Yes	Yes	Verified
Hmgcs2	1423858_a_at	0.4	0.000634	0.54			Yes	Verified
Lpd	1422428_at	0.43	0.000128	0.5			Yes	Verified
Nat2	1449981_a_at	0.4	0.000582	0.67		Yes	Yes	Verified
Oat	1416452_at	0.4	0.000497	0.51		Yes	Yes	Not Verified
Optn	1429778_at	0.42	0.000239	0.51		Yes		Verified
Pag	1440033_at	-0.43	0.000177	0.57			Yes	Verified
Sod2	1417193_at	0.38	0.000955	0.5		Yes	Yes	Verified
Shading denotes genes whose expression in the hippocampus is below background (average log2 expression < 7). Lit Corr = literature correlation between the genes listed in the table and Gsto1 based on the NCBI Rif; AD & FTDM DB = Alzheimer and Frontotemporal Dementia Mutation Database; Alzgene = field synopsis of genetic association studies in AD.
