# Supplementary material for: The Genetic Architecture of Murine Glutathione Transferases
Source: PLoS One. 2016 Feb 1;11(2):e0148230. doi: 10.1371/journal.pone.0148230 (PMC4734686; doi:10.1371/journal.pone.0148230)
Supplement: S10 Table — (XLSX) [file pone.0148230.s016.xlsx]

## Sheet: S10 Table
S10 Table. Gene enrichment for Mitochondrion for the top 1000 gene correlates of GSTO1 using cortical expression data from human AD cases and controls
MOUSE
cellular component::mitochondrion::GO:0005739
C=1480;O=36;E=9.77;R=3.69;rawP=1.92e-12;adjP=9.22e-11
Probe Set	r (GSTO1)	Symbol	Name	Entrez ID	Ensemble Gene ID	List Overlap
1424182_at	NA	Acat1	acetyl-Coenzyme A acetyltransferase 1	110446	ENSMUSG00000032047
1444518_at	NA	Acox1	acyl-Coenzyme A oxidase 1, palmitoyl	11430	ENSMUSG00000020777
1428387_at	NA	Acsl3	acyl-CoA synthetase long-chain family member 3	74205	ENSMUSG00000032883
1441829_s_at	NA	Akap10	A kinase (PRKA) anchor protein 10	56697	ENSMUSG00000047804
1457155_at	NA	Aldh2	aldehyde dehydrogenase 2, mitochondrial	11669	ENSMUSG00000029455
1437398_a_at	NA	Aldh9a1	aldehyde dehydrogenase 9, subfamily A1	56752	ENSMUSG00000026687
1428889_at	NA	Alkbh3	alkB, alkylation repair homolog 3 (E. coli)	69113	ENSMUSG00000040174
1450871_a_at	NA	Bcat1	branched chain aminotransferase 1, cytosolic	12035	ENSMUSG00000030268
1455699_at	NA	Bcat1	branched chain aminotransferase 1, cytosolic	12035	ENSMUSG00000030268
1428253_at	NA	Chmp2b	charged multivesicular body protein 2B	68942	ENSMUSG00000004843
1454268_a_at	NA	Cyba	cytochrome b-245, alpha polypeptide	13057	ENSMUSG00000006519
1423159_at	NA	Dld	dihydrolipoamide dehydrogenase	13382	ENSMUSG00000020664
1423710_at	NA	Dlst	dihydrolipoamide S-succinyltransferase (E2 component of 2-oxo-glutarate complex)	78920	ENSMUSG00000004789
1419270_a_at	NA	Dut	deoxyuridine triphosphatase	110074	ENSMUSG00000027203
1428477_at	NA	Elac2	elaC homolog 2 (E. coli)	68626	ENSMUSG00000020549
1455525_at	NA	Exog	endo/exonuclease (5'-3'), endonuclease G-like	208194	ENSMUSG00000042787
1427282_a_at	NA	Fxn	frataxin	14297	ENSMUSG00000059363
1416592_at	NA	Glrx	glutaredoxin	93692	ENSMUSG00000021591
1437679_a_at	NA	Glrx2	glutaredoxin 2 (thioltransferase)	69367	ENSMUSG00000018196	YES
1428323_at	NA	Gpd2	glycerol phosphate dehydrogenase 2, mitochondrial	14571	ENSMUSG00000026827
1448148_at	NA	Grn	granulin	14824	ENSMUSG00000034708
1452823_at	NA	Gstk1	glutathione S-transferase kappa 1	76263	ENSMUSG00000029864
1424172_at	NA	Hagh	hydroxyacyl glutathione hydrolase	14651	ENSMUSG00000024158
1423858_a_at	NA	Hmgcs2	3-hydroxy-3-methylglutaryl-Coenzyme A synthase 2	15360	ENSMUSG00000027875
1418503_at	NA	Hspa9	heat shock protein 9	15526	ENSMUSG00000024359
1422579_at	NA	Hspe1	heat shock protein 1 (chaperonin 10)	15528	ENSMUSG00000073676
1419737_a_at	NA	Ldha	lactate dehydrogenase A	16828	ENSMUSG00000063229
1421914_s_at	NA	Mrpl19	mitochondrial ribosomal protein L19	56284	ENSMUSG00000030045
1440324_at	NA	Mrpl19	mitochondrial ribosomal protein L19	56284	ENSMUSG00000030045
1450405_at	NA	Mrpl19	mitochondrial ribosomal protein L19	56284	ENSMUSG00000030045
1419254_at	NA	Mthfd2	methylenetetrahydrofolate dehydrogenase (NAD+ dependent), methenyltetrahydrofolate cyclohydrolase	17768	ENSMUSG00000005667
1451050_at	NA	Nt5c3	5'-nucleotidase, cytosolic III	107569	ENSMUSG00000029780
1416452_at	NA	Oat	ornithine aminotransferase	18242	ENSMUSG00000030934
1451405_at	NA	Pcca	propionyl-Coenzyme A carboxylase, alpha polypeptide	110821	ENSMUSG00000041650
1450969_at	NA	Pccb	propionyl Coenzyme A carboxylase, beta polypeptide	66904	ENSMUSG00000032527
1435317_x_at	NA	Psma6	proteasome (prosome, macropain) subunit, alpha type 6	26443	ENSMUSG00000021024	YES
1424556_at	NA	Pycr1	pyrroline-5-carboxylate reductase 1	209027	ENSMUSG00000025140
1428440_at	NA	Slc25a12	solute carrier family 25 (mitochondrial carrier, Aralar), member 12	78830	ENSMUSG00000027010	YES
1417193_at	NA	Sod2	superoxide dismutase 2, mitochondrial	20656	ENSMUSG00000006818
C = Reference genes in category; O = Actual gene set overlap; E = Expected gene set overlap; R = Ratio of enrichment; rawP = p-value based on hypergeometric distribution; adjP = p-value based on hypergeometric distribution corrected for multiple testing
HUMAN
cellular component::mitochondrion::GO:0005739
C=1409::O=136::E=79.52::R=1.71::rawP=1.67e-10::adjP=2.75e-08
Probe Set	r (GSTO1)	Symbol	Name	Entrez ID	Ensemble Gene ID
ILMN_2570605	-0.4477	SEPT4	septin 4	5414	ENSG00000108387
ILMN_1170403	0.4668	ACN9	ACN9 homolog (S. cerevisiae)	57001	ENSG00000196636
ILMN_5890139	0.5966	ACOT7	acyl-CoA thioesterase 7	11332	ENSG00000097021
ILMN_4200725	-0.5011	ACSS1	acyl-CoA synthetase short-chain family member 1	84532	ENSG00000154930
ILMN_1770750	0.5099	ADO	2-aminoethanethiol (cysteamine) dioxygenase	84890	ENSG00000181915
ILMN_1090142	-0.4688	ARAF	v-raf murine sarcoma 3611 viral oncogene homolog	369	ENSG00000078061
ILMN_3800131	0.514	ATAD1	ATPase family, AAA domain containing 1	84896	ENSG00000138138
ILMN_730333	0.4713	ATP5G1	ATP synthase, H+ transporting, mitochondrial Fo complex, subunit C1 (subunit 9)	516	ENSG00000159199
ILMN_2570088	0.4965	ATP5J	ATP synthase, H+ transporting, mitochondrial Fo complex, subunit F6	522	ENSG00000154723
ILMN_1190672	0.4671	ATP5L	ATP synthase, H+ transporting, mitochondrial Fo complex, subunit G	10632	ENSG00000167283
ILMN_7000692	0.4717	ATP6V1A	ATPase, H+ transporting, lysosomal 70kDa, V1 subunit A	523	ENSG00000114573
ILMN_380195	0.5426	ATPIF1	ATPase inhibitory factor 1	93974	ENSG00000130770
ILMN_4230286	0.5087	AURKAIP1	aurora kinase A interacting protein 1	54998	ENSG00000175756
ILMN_6350438	-0.4558	BAK1	BCL2-antagonist/killer 1	578	ENSG00000030110
ILMN_3390288	-0.462	BCAT2	branched chain amino-acid transaminase 2, mitochondrial	587	ENSG00000105552
ILMN_2570433	0.5486	BCL2L2	BCL2-like 2	599	ENSG00000129473
ILMN_2320100	-0.5274	C14orf159	chromosome 14 open reading frame 159	80017	ENSG00000133943
ILMN_2480068	0.5074	C14orf2	chromosome 14 open reading frame 2	9556	ENSG00000156411
ILMN_5720373	0.5934	C1QBP	complement component 1, q subcomponent binding protein	708	ENSG00000108561
ILMN_3520273	-0.5777	C20orf72	chromosome 20 open reading frame 72	92667	ENSG00000125871
ILMN_6350086	0.4727	C2orf47	chromosome 2 open reading frame 47	79568	ENSG00000162972
ILMN_4010411	0.5618	CASQ1	calsequestrin 1 (fast-twitch, skeletal muscle)	844	ENSG00000143318
ILMN_5290402	-0.4772	CBR4	carbonyl reductase 4	84869	ENSG00000145439
ILMN_4560239	0.5562	CHCHD6	coiled-coil-helix-coiled-coil-helix domain containing 6	84303	ENSG00000159685
ILMN_6110050	0.4567	CHCHD6	coiled-coil-helix-coiled-coil-helix domain containing 6	84303	ENSG00000159685
ILMN_3440068	-0.5113	CHDH	choline dehydrogenase	55349	ENSG00000016391
ILMN_5390154	0.5213	CIDEA	cell death-inducing DFFA-like effector a	1149	ENSG00000176194
ILMN_4810736	0.5487	CLTC	clathrin, heavy chain (Hc)	1213	ENSG00000141367
ILMN_3170070	0.533	COX5A	cytochrome c oxidase subunit Va	9377	ENSG00000178741
ILMN_6350315	0.5291	CRYM	crystallin, mu	1428	ENSG00000103316
ILMN_1400441	-0.4919	DBT	dihydrolipoamide branched chain transacylase E2	1629	ENSG00000137992
ILMN_6660451	-0.4519	DDIT4	DNA-damage-inducible transcript 4	54541	ENSG00000168209
ILMN_4280672	-0.5825	DHTKD1	dehydrogenase E1 and transketolase domain containing 1	55526	ENSG00000181192
ILMN_540280	-0.4668	DNAJC30	DnaJ (Hsp40) homolog, subfamily C, member 30	84277	ENSG00000176410
ILMN_2810609	0.5599	DNM1L	dynamin 1-like	10059	ENSG00000087470
ILMN_3060292	0.4478	DNM1L	dynamin 1-like	10059	ENSG00000087470
ILMN_5900731	0.5766	DYNLL1	dynein, light chain, LC8-type 1	8655	ENSG00000088986
ILMN_2320097	-0.5226	ECHDC2	enoyl CoA hydratase domain containing 2	55268	ENSG00000121310
ILMN_4210487	0.4932	FAHD1	fumarylacetoacetate hydrolase domain containing 1	81889	ENSG00000180185
ILMN_6380131	-0.5486	FASTK	Fas-activated serine/threonine kinase	10922	ENSG00000164896
ILMN_130731	0.5105	FDPS	farnesyl diphosphate synthase	2224	ENSG00000160752
ILMN_4480736	0.5975	FEZ1	fasciculation and elongation protein zeta 1 (zygin I)	9638	ENSG00000149557
ILMN_1980746	-0.4518	FRMD6	FERM domain containing 6	122786	ENSG00000139926
ILMN_3390731	0.5195	FUNDC1	FUN14 domain containing 1	139341	ENSG00000069509
ILMN_1980070	-0.4572	FYN	FYN oncogene related to SRC, FGR, YES	2534	ENSG00000010810
ILMN_4200332	0.5708	GADD45GIP1	growth arrest and DNA-damage-inducible, gamma interacting protein 1	90480	ENSG00000179271
ILMN_430348	0.5518	GCAT	glycine C-acetyltransferase	23464	ENSG00000100116
ILMN_2690093	0.4867	GHITM	growth hormone inducible transmembrane protein	27069	ENSG00000165678
ILMN_870138	0.6011	GLOD4	glyoxalase domain containing 4	51031	ENSG00000167699
ILMN_380242	0.5706	GLRX2	glutaredoxin 2	51022	ENSG00000023572
ILMN_1940717	0.4766	GLS	glutaminase	2744	ENSG00000115419
ILMN_2850286	-0.5338	GPRC5C	G protein-coupled receptor, family C, group 5, member C	55890	ENSG00000170412
ILMN_2900286	0.4635	GRPEL1	GrpE-like 1, mitochondrial (E. coli)	80273	ENSG00000109519
ILMN_6350372	0.4678	HCCS	holocytochrome c synthase	3052	ENSG00000004961
ILMN_630348	0.4761	IMPA1	inositol(myo)-1(or 4)-monophosphatase 1	3612	ENSG00000133731
ILMN_6590551	0.4906	LDHB	lactate dehydrogenase B	3945	ENSG00000111716
ILMN_6550600	-0.5332	LDHD	lactate dehydrogenase D	197257	ENSG00000166816
ILMN_4780402	0.4636	LRRC59	leucine rich repeat containing 59	55379	ENSG00000108829
ILMN_1580711	0.5606	LRRK1	leucine-rich repeat kinase 1	79705	ENSG00000154237
ILMN_5360711	0.4477	MALSU1	mitochondrial assembly of ribosomal large subunit 1	115416	ENSG00000156928
ILMN_580471	0.4725	MAPK1	mitogen-activated protein kinase 1	5594	ENSG00000100030
ILMN_5570484	0.4489	MAT2B	methionine adenosyltransferase II, beta	27430	ENSG00000038274
ILMN_3830164	0.4623	MCAT	malonyl CoA:ACP acyltransferase (mitochondrial)	27349	ENSG00000100294
ILMN_770670	-0.4609	MLXIP	MLX interacting protein	22877	ENSG00000175727
ILMN_2120088	0.4827	MRPL12	mitochondrial ribosomal protein L12	6182	ENSG00000262814
ILMN_7040433	0.6002	MRPL18	mitochondrial ribosomal protein L18	29074	ENSG00000112110
ILMN_6590097	0.4659	MRPL32	mitochondrial ribosomal protein L32	64983	ENSG00000106591
ILMN_2570113	0.5533	MRPL36	mitochondrial ribosomal protein L36	64979	ENSG00000171421
ILMN_840471	0.6359	MRPL45	mitochondrial ribosomal protein L45	84311	ENSG00000174100
ILMN_6860672	0.5441	MRPL47	mitochondrial ribosomal protein L47	57129	ENSG00000136522
ILMN_2060167	0.5381	MRPS10	mitochondrial ribosomal protein S10	55173	ENSG00000048544
ILMN_870347	0.7131	MRPS21	mitochondrial ribosomal protein S21	54460	ENSG00000187145
ILMN_5290102	0.6235	MRPS22	mitochondrial ribosomal protein S22	56945	ENSG00000175110
ILMN_5690438	0.4884	MRPS28	mitochondrial ribosomal protein S28	28957	ENSG00000147586
ILMN_6100044	0.4525	MTCH1	mitochondrial carrier 1	23787	ENSG00000137409
ILMN_6860537	0.5391	MTX2	metaxin 2	10651	ENSG00000128654
ILMN_7000102	-0.5076	MUTYH	mutY homolog (E. coli)	4595	ENSG00000132781
ILMN_4230008	0.4777	NARS	asparaginyl-tRNA synthetase	4677	ENSG00000134440
ILMN_1990528	0.5613	NDUFA4	NADH dehydrogenase (ubiquinone) 1 alpha subcomplex, 4, 9kDa	4697	ENSG00000189043
ILMN_2900609	0.4787	NDUFA5	NADH dehydrogenase (ubiquinone) 1 alpha subcomplex, 5, 13kDa	4698	ENSG00000128609
ILMN_5890647	0.6087	NDUFA8	NADH dehydrogenase (ubiquinone) 1 alpha subcomplex, 8, 19kDa	4702	ENSG00000119421
ILMN_780609	0.479	NDUFAF2	NADH dehydrogenase (ubiquinone) complex I, assembly factor 2	91942	ENSG00000164182
ILMN_2680132	-0.461	NDUFAF5	NADH dehydrogenase (ubiquinone) complex I, assembly factor 5	79133	ENSG00000101247
ILMN_5220377	0.4972	NDUFB1	NADH dehydrogenase (ubiquinone) 1 beta subcomplex, 1, 7kDa	4707	ENSG00000183648
ILMN_430408	0.4662	NDUFB8	NADH dehydrogenase (ubiquinone) 1 beta subcomplex, 8, 19kDa	4714	ENSG00000166136
ILMN_5570324	0.5038	NDUFS5	NADH dehydrogenase (ubiquinone) Fe-S protein 5, 15kDa (NADH-coenzyme Q reductase)	4725	ENSG00000168653
ILMN_3130142	-0.4631	NFKB1	nuclear factor of kappa light polypeptide gene enhancer in B-cells 1	4790	ENSG00000109320
ILMN_6520017	0.4844	NFS1	NFS1 nitrogen fixation 1 homolog (S. cerevisiae)	9054	ENSG00000244005
ILMN_5670546	0.4938	NIF3L1	NIF3 NGG1 interacting factor 3-like 1 (S. cerevisiae)	60491	ENSG00000196290
ILMN_5390133	0.4588	NIT1	nitrilase 1	4817	ENSG00000158793
ILMN_2570537	-0.4943	NME3	NME/NM23 nucleoside diphosphate kinase 3	4832	ENSG00000103024
ILMN_1850184	-0.5031	NME6	NME/NM23 nucleoside diphosphate kinase 6	10201	ENSG00000172113
ILMN_7050176	0.4529	NT5DC3	5'-nucleotidase domain containing 3	51559	ENSG00000111696
ILMN_50538	0.4634	OCIAD2	OCIA domain containing 2	132299	ENSG00000145247
ILMN_6040100	0.4773	PANK2	pantothenate kinase 2	80025	ENSG00000125779
ILMN_5420440	-0.5229	PDPR	pyruvate dehydrogenase phosphatase regulatory subunit	55066	ENSG00000090857
ILMN_4540671	0.4862	PET112	PET112 homolog (yeast)	5188	ENSG00000059691
ILMN_6450162	0.5479	PFDN4	prefoldin subunit 4	5203	ENSG00000101132
ILMN_5670438	0.5311	PID1	phosphotyrosine interaction domain containing 1	55022	ENSG00000153823
ILMN_2030537	0.555	PKM	pyruvate kinase, muscle	5315	ENSG00000067225
ILMN_50632	0.4849	PMPCB	peptidase (mitochondrial processing) beta	9512	ENSG00000105819
ILMN_6620463	0.4821	PNKD	paroxysmal nonkinesigenic dyskinesia	25953	ENSG00000127838
ILMN_1050541	0.4917	PPL	periplakin	5493	ENSG00000118898
ILMN_360079	0.4854	PPP2CA	protein phosphatase 2, catalytic subunit, alpha isozyme	5515	ENSG00000113575
ILMN_3990368	0.5174	PSMA6	proteasome (prosome, macropain) subunit, alpha type, 6	5687	ENSG00000100902
ILMN_5550364	0.4501	PSMC2	proteasome (prosome, macropain) 26S subunit, ATPase, 2	5701	ENSG00000161057
ILMN_6980280	0.5105	PTRH2	peptidyl-tRNA hydrolase 2	51651	ENSG00000141378
ILMN_6590113	0.5279	PTS	6-pyruvoyltetrahydropterin synthase	5805	ENSG00000150787
ILMN_3870402	-0.4626	QTRTD1	queuine tRNA-ribosyltransferase domain containing 1	79691	ENSG00000151576
ILMN_6350577	-0.4606	RAI14	retinoic acid induced 14	26064	ENSG00000039560
ILMN_2120292	0.5082	REEP1	receptor accessory protein 1	65055	ENSG00000068615
ILMN_2340139	0.4679	RGS2	regulator of G-protein signaling 2, 24kDa	5997	ENSG00000116741
ILMN_2690450	0.4713	RTN4IP1	reticulon 4 interacting protein 1	84816	ENSG00000130347
ILMN_3060132	0.515	SARS	seryl-tRNA synthetase	6301	ENSG00000031698
ILMN_2350435	0.5036	SDHB	succinate dehydrogenase complex, subunit B, iron sulfur (Ip)	6390	ENSG00000117118
ILMN_4120288	0.4477	SIRT5	sirtuin 5	23408	ENSG00000124523
ILMN_3870215	0.5283	SLC25A12	solute carrier family 25 (aspartate/glutamate carrier), member 12	8604	ENSG00000115840
ILMN_5690324	0.511	SLC25A14	solute carrier family 25 (mitochondrial carrier, brain), member 14	9016	ENSG00000102078
ILMN_4610739	0.7068	SLC25A44	solute carrier family 25, member 44	9673	ENSG00000160785
ILMN_6520072	0.4553	SLC25A46	solute carrier family 25, member 46	91137	ENSG00000164209
ILMN_1780750	-0.4849	SLC27A1	solute carrier family 27 (fatty acid transporter), member 1	376497	ENSG00000130304
ILMN_1050056	0.4707	SLC9A6	solute carrier family 9, subfamily A (NHE6, cation proton antiporter 6), member 6	10479	ENSG00000198689
ILMN_6590092	0.5005	SSBP1	single-stranded DNA binding protein 1, mitochondrial	6742	ENSG00000106028
ILMN_4120717	0.5328	STAR	steroidogenic acute regulatory protein	6770	ENSG00000147465
ILMN_70193	0.5281	STRAP	serine/threonine kinase receptor associated protein	11171	ENSG00000023734
ILMN_6450341	0.4793	STXBP1	syntaxin binding protein 1	6812	ENSG00000136854
ILMN_4480735	-0.4547	SYNJ2BP	synaptojanin 2 binding protein	55333	ENSG00000213463
ILMN_6450154	0.5136	TIMM8A	translocase of inner mitochondrial membrane 8 homolog A (yeast)	1678	ENSG00000126953
ILMN_5220273	0.4718	TMEM186	transmembrane protein 186	25880	ENSG00000184857
ILMN_4280368	0.5736	TOMM40L	translocase of outer mitochondrial membrane 40 homolog (yeast)-like	84134	ENSG00000158882
ILMN_1170647	0.5398	TOMM70A	translocase of outer mitochondrial membrane 70 homolog A (S. cerevisiae)	9868	ENSG00000154174
ILMN_5220010	-0.4563	TRIM39	tripartite motif containing 39	56658	ENSG00000204599
ILMN_1240195	0.4767	TRNT1	tRNA nucleotidyl transferase, CCA-adding, 1	51095	ENSG00000072756
ILMN_6620594	0.4583	TUSC3	tumor suppressor candidate 3	7991	ENSG00000104723
ILMN_3520600	0.4536	UQCRH	ubiquinol-cytochrome c reductase hinge protein	7388	ENSG00000173660
ILMN_610400	-0.4588	WWOX	WW domain containing oxidoreductase	51741	ENSG00000186153
ILMN_5910377	-0.4519	WWOX	WW domain containing oxidoreductase	51741	ENSG00000186153
ILMN_3140048	0.5922	YWHAZ	tyrosine 3-monooxygenase/tryptophan 5-monooxygenase activation protein, zeta polypeptide	7534	ENSG00000164924
ILMN_3520041	-0.4817	ZDHHC8	zinc finger, DHHC-type containing 8	29801	ENSG00000099904
C = Reference genes in category; O = Actual gene set overlap; E = Expected gene set overlap; R = Ratio of enrichment; rawP = p-value based on hypergeometric distribution; adjP = p-value based on hypergeometric distribution corrected for multiple testing
