# Supplementary material for: The Genetic Architecture of Murine Glutathione Transferases
Source: PLoS One. 2016 Feb 1;11(2):e0148230. doi: 10.1371/journal.pone.0148230 (PMC4734686; doi:10.1371/journal.pone.0148230)
Supplement: S13 Table — (XLSX) [file pone.0148230.s019.xlsx]

## Sheet: S13 Table
S13 Table. Gene enrichment for top 500 correlates of Mgst3 in Human
biological process::purine ribonucleoside biosynthetic process::GO:0046129
C=89;O=13;E=2.61;R=4.99;rawP=1.78e-06;adjP=0.0018
Probe Set	r (cortex)	Symbol	Name	Entrez ID	Ensemble Gene ID
ILMN_1450528	0.7377	HPRT1	hypoxanthine phosphoribosyltransferase 1	3251	ENSG00000165704
ILMN_5860707	0.7444	AK5	adenylate kinase 5	26289	ENSG00000154027
ILMN_1780333	0.7631	NME1	NME/NM23 nucleoside diphosphate kinase 1	4830	ENSG00000239672
ILMN_5900082	0.748	ATP2A2	ATPase, Ca++ transporting, cardiac muscle, slow twitch 2	488	ENSG00000174437
ILMN_6350400	0.6787	ATP5G3	ATP synthase, H+ transporting, mitochondrial Fo complex, subunit C3 (subunit 9)	518	ENSG00000154518
ILMN_3710458	0.7219	ATP5C1	ATP synthase, H+ transporting, mitochondrial F1 complex, gamma polypeptide 1	509	ENSG00000165629
ILMN_6020148	0.8006	ATP5H	ATP synthase, H+ transporting, mitochondrial Fo complex, subunit d	10476	ENSG00000167863
ILMN_2570341	0.6724	ATP2C1	ATPase, Ca++ transporting, type 2C, member 1	27032	ENSG00000017260
ILMN_4200390	0.6865	ALDOA	aldolase A, fructose-bisphosphate	226	ENSG00000149925
ILMN_1170113	0.7057	ATP1B1	ATPase, Na+/K+ transporting, beta 1 polypeptide	481	ENSG00000143153
ILMN_5720368	0.6835	ATP5F1	ATP synthase, H+ transporting, mitochondrial Fo complex, subunit B1	515	ENSG00000116459
ILMN_3870402	-0.6748	QTRTD1	queuine tRNA-ribosyltransferase domain containing 1	79691	ENSG00000151576
ILMN_6130181	0.6782	ATP1A3	ATPase, Na+/K+ transporting, alpha 3 polypeptide	478	ENSG00000105409
biological process::purine nucleoside biosynthetic process::GO:0042451
C=89;O=13;E=2.61;R=4.99;rawP=1.78e-06;adjP=0.0018
Probe Set	r (cortex)	Symbol	Name	Entrez ID	Ensemble Gene ID
ILMN_1450528	0.7377	HPRT1	hypoxanthine phosphoribosyltransferase 1	3251	ENSG00000165704
ILMN_5860707	0.7444	AK5	adenylate kinase 5	26289	ENSG00000154027
ILMN_1780333	0.7631	NME1	NME/NM23 nucleoside diphosphate kinase 1	4830	ENSG00000239672
ILMN_5900082	0.748	ATP2A2	ATPase, Ca++ transporting, cardiac muscle, slow twitch 2	488	ENSG00000174437
ILMN_6350400	0.6787	ATP5G3	ATP synthase, H+ transporting, mitochondrial Fo complex, subunit C3 (subunit 9)	518	ENSG00000154518
ILMN_3710458	0.7219	ATP5C1	ATP synthase, H+ transporting, mitochondrial F1 complex, gamma polypeptide 1	509	ENSG00000165629
ILMN_6020148	0.8006	ATP5H	ATP synthase, H+ transporting, mitochondrial Fo complex, subunit d	10476	ENSG00000167863
ILMN_2570341	0.6724	ATP2C1	ATPase, Ca++ transporting, type 2C, member 1	27032	ENSG00000017260
ILMN_4200390	0.6865	ALDOA	aldolase A, fructose-bisphosphate	226	ENSG00000149925
ILMN_1170113	0.7057	ATP1B1	ATPase, Na+/K+ transporting, beta 1 polypeptide	481	ENSG00000143153
ILMN_5720368	0.6835	ATP5F1	ATP synthase, H+ transporting, mitochondrial Fo complex, subunit B1	515	ENSG00000116459
ILMN_3870402	-0.6748	QTRTD1	queuine tRNA-ribosyltransferase domain containing 1	79691	ENSG00000151576
ILMN_6130181	0.6782	ATP1A3	ATPase, Na+/K+ transporting, alpha 3 polypeptide	478	ENSG00000105409
biological process::purine nucleoside triphosphate biosynthetic process::GO:0009145
C=58;O=10;E=1.70;R=5.89;rawP=6.13e-06;adjP=0.0021
Probe Set	r (cortex)	Symbol	Name	Entrez ID	Ensemble Gene ID
ILMN_1780333	0.7631	NME1	NME/NM23 nucleoside diphosphate kinase 1	4830	ENSG00000239672
ILMN_5900082	0.748	ATP2A2	ATPase, Ca++ transporting, cardiac muscle, slow twitch 2	488	ENSG00000174437
ILMN_6350400	0.6787	ATP5G3	ATP synthase, H+ transporting, mitochondrial Fo complex, subunit C3 (subunit 9)	518	ENSG00000154518
ILMN_3710458	0.7219	ATP5C1	ATP synthase, H+ transporting, mitochondrial F1 complex, gamma polypeptide 1	509	ENSG00000165629
ILMN_6020148	0.8006	ATP5H	ATP synthase, H+ transporting, mitochondrial Fo complex, subunit d	10476	ENSG00000167863
ILMN_2570341	0.6724	ATP2C1	ATPase, Ca++ transporting, type 2C, member 1	27032	ENSG00000017260
ILMN_4200390	0.6865	ALDOA	aldolase A, fructose-bisphosphate	226	ENSG00000149925
ILMN_1170113	0.7057	ATP1B1	ATPase, Na+/K+ transporting, beta 1 polypeptide	481	ENSG00000143153
ILMN_6130181	0.6782	ATP1A3	ATPase, Na+/K+ transporting, alpha 3 polypeptide	478	ENSG00000105409
ILMN_5720368	0.6835	ATP5F1	ATP synthase, H+ transporting, mitochondrial Fo complex, subunit B1	515	ENSG00000116459
biological process::ribonucleoside biosynthetic process::GO:0042455
C=101;O=13;E=2.96;R=4.40;rawP=7.52e-06;adjP=0.0021
Probe Set	r (cortex)	Symbol	Name	Entrez ID	Ensemble Gene ID
ILMN_1450528	0.7377	HPRT1	hypoxanthine phosphoribosyltransferase 1	3251	ENSG00000165704
ILMN_5860707	0.7444	AK5	adenylate kinase 5	26289	ENSG00000154027
ILMN_1780333	0.7631	NME1	NME/NM23 nucleoside diphosphate kinase 1	4830	ENSG00000239672
ILMN_5900082	0.748	ATP2A2	ATPase, Ca++ transporting, cardiac muscle, slow twitch 2	488	ENSG00000174437
ILMN_6350400	0.6787	ATP5G3	ATP synthase, H+ transporting, mitochondrial Fo complex, subunit C3 (subunit 9)	518	ENSG00000154518
ILMN_3710458	0.7219	ATP5C1	ATP synthase, H+ transporting, mitochondrial F1 complex, gamma polypeptide 1	509	ENSG00000165629
ILMN_6020148	0.8006	ATP5H	ATP synthase, H+ transporting, mitochondrial Fo complex, subunit d	10476	ENSG00000167863
ILMN_2570341	0.6724	ATP2C1	ATPase, Ca++ transporting, type 2C, member 1	27032	ENSG00000017260
ILMN_4200390	0.6865	ALDOA	aldolase A, fructose-bisphosphate	226	ENSG00000149925
ILMN_1170113	0.7057	ATP1B1	ATPase, Na+/K+ transporting, beta 1 polypeptide	481	ENSG00000143153
ILMN_5720368	0.6835	ATP5F1	ATP synthase, H+ transporting, mitochondrial Fo complex, subunit B1	515	ENSG00000116459
ILMN_3870402	-0.6748	QTRTD1	queuine tRNA-ribosyltransferase domain containing 1	79691	ENSG00000151576
ILMN_6130181	0.6782	ATP1A3	ATPase, Na+/K+ transporting, alpha 3 polypeptide	478	ENSG00000105409
biological process::purine ribonucleoside triphosphate biosynthetic process::GO:0009206
C=57;O=10;E=1.67;R=5.99;rawP=5.21e-06;adjP=0.0021
Probe Set	r (cortex)	Symbol	Name	Entrez ID	Ensemble Gene ID
ILMN_1780333	0.7631	NME1	NME/NM23 nucleoside diphosphate kinase 1	4830	ENSG00000239672
ILMN_5900082	0.748	ATP2A2	ATPase, Ca++ transporting, cardiac muscle, slow twitch 2	488	ENSG00000174437
ILMN_6350400	0.6787	ATP5G3	ATP synthase, H+ transporting, mitochondrial Fo complex, subunit C3 (subunit 9)	518	ENSG00000154518
ILMN_3710458	0.7219	ATP5C1	ATP synthase, H+ transporting, mitochondrial F1 complex, gamma polypeptide 1	509	ENSG00000165629
ILMN_6020148	0.8006	ATP5H	ATP synthase, H+ transporting, mitochondrial Fo complex, subunit d	10476	ENSG00000167863
ILMN_2570341	0.6724	ATP2C1	ATPase, Ca++ transporting, type 2C, member 1	27032	ENSG00000017260
ILMN_4200390	0.6865	ALDOA	aldolase A, fructose-bisphosphate	226	ENSG00000149925
ILMN_1170113	0.7057	ATP1B1	ATPase, Na+/K+ transporting, beta 1 polypeptide	481	ENSG00000143153
ILMN_6130181	0.6782	ATP1A3	ATPase, Na+/K+ transporting, alpha 3 polypeptide	478	ENSG00000105409
ILMN_5720368	0.6835	ATP5F1	ATP synthase, H+ transporting, mitochondrial Fo complex, subunit B1	515	ENSG00000116459
biological process::purine ribonucleotide biosynthetic process::GO:0009152
C=86;O=12;E=2.52;R=4.77;rawP=7.24e-06;adjP=0.0021
Probe Set	r (cortex)	Symbol	Name	Entrez ID	Ensemble Gene ID
ILMN_1450528	0.7377	HPRT1	hypoxanthine phosphoribosyltransferase 1	3251	ENSG00000165704
ILMN_1780333	0.7631	NME1	NME/NM23 nucleoside diphosphate kinase 1	4830	ENSG00000239672
ILMN_6350400	0.6787	ATP5G3	ATP synthase, H+ transporting, mitochondrial Fo complex, subunit C3 (subunit 9)	518	ENSG00000154518
ILMN_6020148	0.8006	ATP5H	ATP synthase, H+ transporting, mitochondrial Fo complex, subunit d	10476	ENSG00000167863
ILMN_4200390	0.6865	ALDOA	aldolase A, fructose-bisphosphate	226	ENSG00000149925
ILMN_6130181	0.6782	ATP1A3	ATPase, Na+/K+ transporting, alpha 3 polypeptide	478	ENSG00000105409
biological process::respiratory electron transport chain::GO:0022904
C=96;O=13;E=2.81;R=4.63;rawP=4.24e-06;adjP=0.0021
Probe Set	r (cortex)	Symbol	Name	Entrez ID	Ensemble Gene ID
ILMN_5050064	0.7434	UQCRQ	ubiquinol-cytochrome c reductase, complex III subunit VII, 9.5kDa	27089	ENSG00000164405
ILMN_3710458	0.7219	ATP5C1	ATP synthase, H+ transporting, mitochondrial F1 complex, gamma polypeptide 1	509	ENSG00000165629
ILMN_6020148	0.8006	ATP5H	ATP synthase, H+ transporting, mitochondrial Fo complex, subunit d	10476	ENSG00000167863
ILMN_5890048	0.6779	NDUFB5	NADH dehydrogenase (ubiquinone) 1 beta subcomplex, 5, 16kDa	4711	ENSG00000136521
ILMN_3170070	0.7387	COX5A	cytochrome c oxidase subunit Va	9377	ENSG00000178741
ILMN_7000497	0.7462	COX7B	cytochrome c oxidase subunit VIIb	1349	ENSG00000131174
ILMN_5270164	0.6912	UQCR11	ubiquinol-cytochrome c reductase, complex III subunit XI	10975	ENSG00000127540
ILMN_5220377	0.7577	NDUFB1	NADH dehydrogenase (ubiquinone) 1 beta subcomplex, 1, 7kDa	4707	ENSG00000183648
ILMN_5390010	0.8082	COX6C	cytochrome c oxidase subunit VIc	1345	ENSG00000164919
ILMN_5890647	0.7027	NDUFA8	NADH dehydrogenase (ubiquinone) 1 alpha subcomplex, 8, 19kDa	4702	ENSG00000119421
ILMN_5890167	-0.7121	TAZ	tafazzin	6901	ENSG00000102125
ILMN_5720368	0.6835	ATP5F1	ATP synthase, H+ transporting, mitochondrial Fo complex, subunit B1	515	ENSG00000116459
ILMN_4070292	0.713	SNCA	synuclein, alpha (non A4 component of amyloid precursor)	6622	ENSG00000145335
biological process::ATP biosynthetic process::GO:0006754
C=48;O=9;E=1.41;R=6.40;rawP=8.78e-06;adjP=0.0022
Probe Set	r (cortex)	Symbol	Name	Entrez ID	Ensemble Gene ID
ILMN_5900082	0.748	ATP2A2	ATPase, Ca++ transporting, cardiac muscle, slow twitch 2	488	ENSG00000174437
ILMN_6350400	0.6787	ATP5G3	ATP synthase, H+ transporting, mitochondrial Fo complex, subunit C3 (subunit 9)	518	ENSG00000154518
ILMN_3710458	0.7219	ATP5C1	ATP synthase, H+ transporting, mitochondrial F1 complex, gamma polypeptide 1	509	ENSG00000165629
ILMN_6020148	0.8006	ATP5H	ATP synthase, H+ transporting, mitochondrial Fo complex, subunit d	10476	ENSG00000167863
ILMN_2570341	0.6724	ATP2C1	ATPase, Ca++ transporting, type 2C, member 1	27032	ENSG00000017260
ILMN_4200390	0.6865	ALDOA	aldolase A, fructose-bisphosphate	226	ENSG00000149925
ILMN_1170113	0.7057	ATP1B1	ATPase, Na+/K+ transporting, beta 1 polypeptide	481	ENSG00000143153
ILMN_6130181	0.6782	ATP1A3	ATPase, Na+/K+ transporting, alpha 3 polypeptide	478	ENSG00000105409
ILMN_5720368	0.6835	ATP5F1	ATP synthase, H+ transporting, mitochondrial Fo complex, subunit B1	515	ENSG00000116459
biological process::purine nucleoside triphosphate metabolic process::GO:0009144
C=427;O=29;E=12.50;R=2.32;rawP=2.30e-05;adjP=0.0022
Probe Set	r (cortex)	Symbol	Name	Entrez ID	Ensemble Gene ID
ILMN_6900066	0.8312	RGS4	regulator of G-protein signaling 4	5999	ENSG00000117152
ILMN_5860707	0.7444	AK5	adenylate kinase 5	26289	ENSG00000154027
ILMN_2570341	0.6724	ATP2C1	ATPase, Ca++ transporting, type 2C, member 1	27032	ENSG00000017260
ILMN_6380731	0.6873	ARL8B	ADP-ribosylation factor-like 8B	55207	ENSG00000134108
ILMN_1740347	0.7202	MAP2K1	mitogen-activated protein kinase kinase 1	5604	ENSG00000169032
ILMN_4480041	0.6673	ELMOD1	ELMO/CED-12 domain containing 1	55531	ENSG00000110675
ILMN_840600	0.7189	ARF1	ADP-ribosylation factor 1	375	ENSG00000143761
ILMN_1170113	0.7057	ATP1B1	ATPase, Na+/K+ transporting, beta 1 polypeptide	481	ENSG00000143153
ILMN_5080142	0.7472	OPA1	optic atrophy 1 (autosomal dominant)	4976	ENSG00000198836
ILMN_5670092	0.673	RAB1A	RAB1A, member RAS oncogene family	5861	ENSG00000138069
ILMN_430164	-0.683	PLXNB2	plexin B2	23654	ENSG00000196576
ILMN_5720368	0.6835	ATP5F1	ATP synthase, H+ transporting, mitochondrial Fo complex, subunit B1	515	ENSG00000116459
ILMN_6660593	0.6983	GNAS	GNAS complex locus	2778	ENSG00000087460
ILMN_510368	0.7375	CHN1	chimerin (chimaerin) 1	1123	ENSG00000128656
ILMN_5900082	0.748	ATP2A2	ATPase, Ca++ transporting, cardiac muscle, slow twitch 2	488	ENSG00000174437
ILMN_1780333	0.7631	NME1	NME/NM23 nucleoside diphosphate kinase 1	4830	ENSG00000239672
ILMN_2340671	0.6977	CDC42	cell division cycle 42 (GTP binding protein, 25kDa)	998	ENSG00000070831
ILMN_6350400	0.6787	ATP5G3	ATP synthase, H+ transporting, mitochondrial Fo complex, subunit C3 (subunit 9)	518	ENSG00000154518
ILMN_2120025	0.747	ARL1	ADP-ribosylation factor-like 1	400	ENSG00000120805
ILMN_6020148	0.8006	ATP5H	ATP synthase, H+ transporting, mitochondrial Fo complex, subunit d	10476	ENSG00000167863
ILMN_3710458	0.7219	ATP5C1	ATP synthase, H+ transporting, mitochondrial F1 complex, gamma polypeptide 1	509	ENSG00000165629
ILMN_4200390	0.6865	ALDOA	aldolase A, fructose-bisphosphate	226	ENSG00000149925
ILMN_5700037	0.6631	ACLY	ATP citrate lyase	47	ENSG00000131473
ILMN_4480601	0.6791	ARF3	ADP-ribosylation factor 3	377	ENSG00000134287
ILMN_4200446	0.8497	PTPRN2	protein tyrosine phosphatase, receptor type, N polypeptide 2	5799	ENSG00000155093
ILMN_5390181	0.7302	RGS6	regulator of G-protein signaling 6	9628	ENSG00000182732
ILMN_3990112	0.7882	ATP6V1H	ATPase, H+ transporting, lysosomal 50/57kDa, V1 subunit H	51606	ENSG00000047249
ILMN_7000735	0.7484	NGEF	neuronal guanine nucleotide exchange factor	25791	ENSG00000066248
ILMN_6130181	0.6782	ATP1A3	ATPase, Na+/K+ transporting, alpha 3 polypeptide	478	ENSG00000105409
biological process::ribonucleoside triphosphate biosynthetic process::GO:0009201
C=62;O=10;E=1.82;R=5.51;rawP=1.14e-05;adjP=0.0022
Probe Set	r (cortex)	Symbol	Name	Entrez ID	Ensemble Gene ID
ILMN_1780333	0.7631	NME1	NME/NM23 nucleoside diphosphate kinase 1	4830	ENSG00000239672
ILMN_5900082	0.748	ATP2A2	ATPase, Ca++ transporting, cardiac muscle, slow twitch 2	488	ENSG00000174437
ILMN_6350400	0.6787	ATP5G3	ATP synthase, H+ transporting, mitochondrial Fo complex, subunit C3 (subunit 9)	518	ENSG00000154518
ILMN_3710458	0.7219	ATP5C1	ATP synthase, H+ transporting, mitochondrial F1 complex, gamma polypeptide 1	509	ENSG00000165629
ILMN_6020148	0.8006	ATP5H	ATP synthase, H+ transporting, mitochondrial Fo complex, subunit d	10476	ENSG00000167863
ILMN_2570341	0.6724	ATP2C1	ATPase, Ca++ transporting, type 2C, member 1	27032	ENSG00000017260
ILMN_4200390	0.6865	ALDOA	aldolase A, fructose-bisphosphate	226	ENSG00000149925
ILMN_1170113	0.7057	ATP1B1	ATPase, Na+/K+ transporting, beta 1 polypeptide	481	ENSG00000143153
ILMN_6130181	0.6782	ATP1A3	ATPase, Na+/K+ transporting, alpha 3 polypeptide	478	ENSG00000105409
ILMN_5720368	0.6835	ATP5F1	ATP synthase, H+ transporting, mitochondrial Fo complex, subunit B1	515	ENSG00000116459
molecular function::hydrogen ion transmembrane transporter activity::GO:0015078
C=85;O=14;E=2.39;R=5.86;rawP=9.50e-08;adjP=3.82e-05
Probe Set	r (cortex)	Symbol	Name	Entrez ID	Ensemble Gene ID
ILMN_6350400	0.6787	ATP5G3	ATP synthase, H+ transporting, mitochondrial Fo complex, subunit C3 (subunit 9)	518	ENSG00000154518
ILMN_7000692	0.6757	ATP6V1A	ATPase, H+ transporting, lysosomal 70kDa, V1 subunit A	523	ENSG00000114573
ILMN_5050064	0.7434	UQCRQ	ubiquinol-cytochrome c reductase, complex III subunit VII, 9.5kDa	27089	ENSG00000164405
ILMN_1050056	0.7838	SLC9A6	solute carrier family 9, subfamily A (NHE6, cation proton antiporter 6), member 6	10479	ENSG00000198689
ILMN_3710458	0.7219	ATP5C1	ATP synthase, H+ transporting, mitochondrial F1 complex, gamma polypeptide 1	509	ENSG00000165629
ILMN_6020148	0.8006	ATP5H	ATP synthase, H+ transporting, mitochondrial Fo complex, subunit d	10476	ENSG00000167863
ILMN_3170070	0.7387	COX5A	cytochrome c oxidase subunit Va	9377	ENSG00000178741
ILMN_5270164	0.6912	UQCR11	ubiquinol-cytochrome c reductase, complex III subunit XI	10975	ENSG00000127540
ILMN_7000497	0.7462	COX7B	cytochrome c oxidase subunit VIIb	1349	ENSG00000131174
ILMN_770575	0.7431	ATP6V1C1	ATPase, H+ transporting, lysosomal 42kDa, V1 subunit C1	528	ENSG00000155097
ILMN_5550592	0.6628	ATP6V1B2	ATPase, H+ transporting, lysosomal 56/58kDa, V1 subunit B2	526	ENSG00000147416
ILMN_3990112	0.7882	ATP6V1H	ATPase, H+ transporting, lysosomal 50/57kDa, V1 subunit H	51606	ENSG00000047249
ILMN_5390010	0.8082	COX6C	cytochrome c oxidase subunit VIc	1345	ENSG00000164919
ILMN_5720368	0.6835	ATP5F1	ATP synthase, H+ transporting, mitochondrial Fo complex, subunit B1	515	ENSG00000116459
molecular function::cation-transporting ATPase activity::GO:0019829
C=28;O=7;E=0.79;R=8.89;rawP=9.37e-06;adjP=0.0019
Probe Set	r (cortex)	Symbol	Name	Entrez ID	Ensemble Gene ID
ILMN_770575	0.7431	ATP6V1C1	ATPase, H+ transporting, lysosomal 42kDa, V1 subunit C1	528	ENSG00000155097
ILMN_5550592	0.6628	ATP6V1B2	ATPase, H+ transporting, lysosomal 56/58kDa, V1 subunit B2	526	ENSG00000147416
ILMN_3990112	0.7882	ATP6V1H	ATPase, H+ transporting, lysosomal 50/57kDa, V1 subunit H	51606	ENSG00000047249
ILMN_5900082	0.748	ATP2A2	ATPase, Ca++ transporting, cardiac muscle, slow twitch 2	488	ENSG00000174437
ILMN_7000692	0.6757	ATP6V1A	ATPase, H+ transporting, lysosomal 70kDa, V1 subunit A	523	ENSG00000114573
ILMN_3710458	0.7219	ATP5C1	ATP synthase, H+ transporting, mitochondrial F1 complex, gamma polypeptide 1	509	ENSG00000165629
ILMN_2570341	0.6724	ATP2C1	ATPase, Ca++ transporting, type 2C, member 1	27032	ENSG00000017260
molecular function::ATPase activity, coupled to transmembrane movement of ions::GO:0042625
C=58;O=9;E=1.63;R=5.52;rawP=3.16e-05;adjP=0.0042
Probe Set	r (cortex)	Symbol	Name	Entrez ID	Ensemble Gene ID
ILMN_5900082	0.748	ATP2A2	ATPase, Ca++ transporting, cardiac muscle, slow twitch 2	488	ENSG00000174437
ILMN_7000692	0.6757	ATP6V1A	ATPase, H+ transporting, lysosomal 70kDa, V1 subunit A	523	ENSG00000114573
ILMN_3710458	0.7219	ATP5C1	ATP synthase, H+ transporting, mitochondrial F1 complex, gamma polypeptide 1	509	ENSG00000165629
ILMN_2570341	0.6724	ATP2C1	ATPase, Ca++ transporting, type 2C, member 1	27032	ENSG00000017260
ILMN_1170113	0.7057	ATP1B1	ATPase, Na+/K+ transporting, beta 1 polypeptide	481	ENSG00000143153
ILMN_3990112	0.7882	ATP6V1H	ATPase, H+ transporting, lysosomal 50/57kDa, V1 subunit H	51606	ENSG00000047249
ILMN_5550592	0.6628	ATP6V1B2	ATPase, H+ transporting, lysosomal 56/58kDa, V1 subunit B2	526	ENSG00000147416
ILMN_770575	0.7431	ATP6V1C1	ATPase, H+ transporting, lysosomal 42kDa, V1 subunit C1	528	ENSG00000155097
ILMN_6130181	0.6782	ATP1A3	ATPase, Na+/K+ transporting, alpha 3 polypeptide	478	ENSG00000105409
molecular function::proton-transporting ATPase activity, rotational mechanism::GO:0046961
C=16;O=5;E=0.45;R=11.11;rawP=5.80e-05;adjP=0.0058
Probe Set	r (cortex)	Symbol	Name	Entrez ID	Ensemble Gene ID
ILMN_770575	0.7431	ATP6V1C1	ATPase, H+ transporting, lysosomal 42kDa, V1 subunit C1	528	ENSG00000155097
ILMN_5550592	0.6628	ATP6V1B2	ATPase, H+ transporting, lysosomal 56/58kDa, V1 subunit B2	526	ENSG00000147416
ILMN_3990112	0.7882	ATP6V1H	ATPase, H+ transporting, lysosomal 50/57kDa, V1 subunit H	51606	ENSG00000047249
ILMN_7000692	0.6757	ATP6V1A	ATPase, H+ transporting, lysosomal 70kDa, V1 subunit A	523	ENSG00000114573
ILMN_3710458	0.7219	ATP5C1	ATP synthase, H+ transporting, mitochondrial F1 complex, gamma polypeptide 1	509	ENSG00000165629
molecular function::primary active transmembrane transporter activity::GO:0015399
C=99;O=11;E=2.78;R=3.95;rawP=0.0001;adjP=0.0067
Probe Set	r (cortex)	Symbol	Name	Entrez ID	Ensemble Gene ID
ILMN_6860717	0.7754	ATP6V1D	ATPase, H+ transporting, lysosomal 34kDa, V1 subunit D	51382	ENSG00000100554
ILMN_6100156	0.7037	TOMM20	translocase of outer mitochondrial membrane 20 homolog (yeast)	9804	ENSG00000173726
ILMN_5900082	0.748	ATP2A2	ATPase, Ca++ transporting, cardiac muscle, slow twitch 2	488	ENSG00000174437
ILMN_7000692	0.6757	ATP6V1A	ATPase, H+ transporting, lysosomal 70kDa, V1 subunit A	523	ENSG00000114573
ILMN_3710458	0.7219	ATP5C1	ATP synthase, H+ transporting, mitochondrial F1 complex, gamma polypeptide 1	509	ENSG00000165629
ILMN_2570341	0.6724	ATP2C1	ATPase, Ca++ transporting, type 2C, member 1	27032	ENSG00000017260
ILMN_1170113	0.7057	ATP1B1	ATPase, Na+/K+ transporting, beta 1 polypeptide	481	ENSG00000143153
ILMN_770575	0.7431	ATP6V1C1	ATPase, H+ transporting, lysosomal 42kDa, V1 subunit C1	528	ENSG00000155097
ILMN_3990112	0.7882	ATP6V1H	ATPase, H+ transporting, lysosomal 50/57kDa, V1 subunit H	51606	ENSG00000047249
ILMN_5550592	0.6628	ATP6V1B2	ATPase, H+ transporting, lysosomal 56/58kDa, V1 subunit B2	526	ENSG00000147416
ILMN_6130181	0.6782	ATP1A3	ATPase, Na+/K+ transporting, alpha 3 polypeptide	478	ENSG00000105409
molecular function::P-P-bond-hydrolysis-driven transmembrane transporter activity::GO:0015405
C=99;O=11;E=2.78;R=3.95;rawP=0.0001;adjP=0.0067
Probe Set	r (cortex)	Symbol	Name	Entrez ID	Ensemble Gene ID
ILMN_6860717	0.7754	ATP6V1D	ATPase, H+ transporting, lysosomal 34kDa, V1 subunit D	51382	ENSG00000100554
ILMN_6100156	0.7037	TOMM20	translocase of outer mitochondrial membrane 20 homolog (yeast)	9804	ENSG00000173726
ILMN_5900082	0.748	ATP2A2	ATPase, Ca++ transporting, cardiac muscle, slow twitch 2	488	ENSG00000174437
ILMN_7000692	0.6757	ATP6V1A	ATPase, H+ transporting, lysosomal 70kDa, V1 subunit A	523	ENSG00000114573
ILMN_3710458	0.7219	ATP5C1	ATP synthase, H+ transporting, mitochondrial F1 complex, gamma polypeptide 1	509	ENSG00000165629
ILMN_2570341	0.6724	ATP2C1	ATPase, Ca++ transporting, type 2C, member 1	27032	ENSG00000017260
ILMN_1170113	0.7057	ATP1B1	ATPase, Na+/K+ transporting, beta 1 polypeptide	481	ENSG00000143153
ILMN_770575	0.7431	ATP6V1C1	ATPase, H+ transporting, lysosomal 42kDa, V1 subunit C1	528	ENSG00000155097
ILMN_3990112	0.7882	ATP6V1H	ATPase, H+ transporting, lysosomal 50/57kDa, V1 subunit H	51606	ENSG00000047249
ILMN_5550592	0.6628	ATP6V1B2	ATPase, H+ transporting, lysosomal 56/58kDa, V1 subunit B2	526	ENSG00000147416
ILMN_6130181	0.6782	ATP1A3	ATPase, Na+/K+ transporting, alpha 3 polypeptide	478	ENSG00000105409
molecular function::protein binding::GO:0005515
C=6933;O=230;E=195.02;R=1.18;rawP=0.0002;adjP=0.0115
Probe Set	r (cortex)	Symbol	Name	Entrez ID	Ensemble Gene ID
ILMN_2230048	0.7437	ACP1	acid phosphatase 1, soluble	52	ENSG00000143727
ILMN_4610551	-0.7253	ACVR2B	activin A receptor, type IIB	93	ENSG00000114739
ILMN_7100519	0.6613	ADCYAP1	adenylate cyclase activating polypeptide 1 (pituitary)	116	ENSG00000141433
ILMN_7050113	-0.6787	AGBL5	ATP/GTP binding protein-like 5	60509	ENSG00000084693
ILMN_1780446	-0.7618	AGER	advanced glycosylation end product-specific receptor	177	ENSG00000204305
ILMN_5570750	0.6653	AKAP6	A kinase (PRKA) anchor protein 6	9472	ENSG00000151320
ILMN_4200390	0.6865	ALDOA	aldolase A, fructose-bisphosphate	226	ENSG00000149925
ILMN_1050739	-0.6731	ANKZF1	ankyrin repeat and zinc finger domain containing 1	55139	ENSG00000163516
ILMN_6860114	0.7227	AP3S1	adaptor-related protein complex 3, sigma 1 subunit	1176	ENSG00000177879
ILMN_130180	-0.6775	AP5Z1	adaptor-related protein complex 5, zeta 1 subunit	9907	ENSG00000242802
ILMN_1090142	-0.732	ARAF	v-raf murine sarcoma 3611 viral oncogene homolog	369	ENSG00000078061
ILMN_840600	0.7189	ARF1	ADP-ribosylation factor 1	375	ENSG00000143761
ILMN_3120092	0.7251	ARHGAP32	Rho GTPase activating protein 32	9743	ENSG00000134909
ILMN_2120025	0.747	ARL1	ADP-ribosylation factor-like 1	400	ENSG00000120805
ILMN_6380731	0.6873	ARL8B	ADP-ribosylation factor-like 8B	55207	ENSG00000134108
ILMN_6380047	0.7255	ARPC1A	actin related protein 2/3 complex, subunit 1A, 41kDa	10552	ENSG00000241685
ILMN_460040	-0.7589	ATM	ataxia telangiectasia mutated	472	ENSG00000149311
ILMN_1170113	0.7057	ATP1B1	ATPase, Na+/K+ transporting, beta 1 polypeptide	481	ENSG00000143153
ILMN_5900082	0.748	ATP2A2	ATPase, Ca++ transporting, cardiac muscle, slow twitch 2	488	ENSG00000174437
ILMN_5720368	0.6835	ATP5F1	ATP synthase, H+ transporting, mitochondrial Fo complex, subunit B1	515	ENSG00000116459
ILMN_6040152	0.7582	ATP6AP2	ATPase, H+ transporting, lysosomal accessory protein 2	10159	ENSG00000182220
ILMN_770575	0.7431	ATP6V1C1	ATPase, H+ transporting, lysosomal 42kDa, V1 subunit C1	528	ENSG00000155097
ILMN_6860717	0.7754	ATP6V1D	ATPase, H+ transporting, lysosomal 34kDa, V1 subunit D	51382	ENSG00000100554
ILMN_3990112	0.7882	ATP6V1H	ATPase, H+ transporting, lysosomal 50/57kDa, V1 subunit H	51606	ENSG00000047249
ILMN_380195	0.6953	ATPIF1	ATPase inhibitory factor 1	93974	ENSG00000130770
ILMN_4010433	0.7402	ATXN10	ataxin 10	25814	ENSG00000130638
ILMN_1770059	0.717	BASP1	brain abundant, membrane attached signal protein 1	10409	ENSG00000176788
ILMN_1770021	-0.703	BAZ2B	bromodomain adjacent to zinc finger domain, 2B	29994	ENSG00000123636
ILMN_6220687	0.6786	BCCIP	BRCA2 and CDKN1A interacting protein	56647	ENSG00000107949
ILMN_6650438	0.6998	BEX1	brain expressed, X-linked 1	55859	ENSG00000133169
ILMN_2850364	-0.7833	BMP1	bone morphogenetic protein 1	649	ENSG00000168487
ILMN_2650040	-0.7202	BRAT1	BRCA1-associated ATM activator 1	221927	ENSG00000106009
ILMN_2940129	0.7161	C17orf79	chromosome 17 open reading frame 79	55352	ENSG00000172301
ILMN_2900707	-0.6648	C19orf25	chromosome 19 open reading frame 25	148223	ENSG00000119559
ILMN_1780301	-0.7061	CACUL1	CDK2-associated, cullin domain 1	143384	ENSG00000151893
ILMN_2470435	0.6929	CADPS	Ca++-dependent secretion activator	8618	ENSG00000163618
ILMN_6100019	0.6744	CALM3	calmodulin 3 (phosphorylase kinase, delta)	808	ENSG00000160014
ILMN_3990687	0.7031	CBLC	Cbl proto-oncogene, E3 ubiquitin protein ligase C	23624	ENSG00000142273
ILMN_5290402	-0.7935	CBR4	carbonyl reductase 4	84869	ENSG00000145439
ILMN_6650170	-0.7158	CCDC88B	coiled-coil domain containing 88B	283234	ENSG00000168071
ILMN_6420528	0.8061	CCK	cholecystokinin	885	ENSG00000187094
ILMN_1450673	0.7736	CCNA1	cyclin A1	8900	ENSG00000133101
ILMN_6370156	0.7737	CCND2	cyclin D2	894	ENSG00000118971
ILMN_6900619	0.7077	CCS	copper chaperone for superoxide dismutase	9973	ENSG00000173992
ILMN_4050180	0.6896	CD200	CD200 molecule	4345	ENSG00000091972
ILMN_2340671	0.6977	CDC42	cell division cycle 42 (GTP binding protein, 25kDa)	998	ENSG00000070831
ILMN_2690133	-0.7298	CEP164	centrosomal protein 164kDa	22897	ENSG00000110274
ILMN_1410575	0.7559	CEP41	centrosomal protein 41kDa	95681	ENSG00000106477
ILMN_3130132	-0.663	CGN	cingulin	57530	ENSG00000143375
ILMN_4560239	0.6652	CHCHD6	coiled-coil-helix-coiled-coil-helix domain containing 6	84303	ENSG00000159685
ILMN_6130100	0.8286	CHMP4B	charged multivesicular body protein 4B	128866	ENSG00000101421
ILMN_510368	0.7375	CHN1	chimerin (chimaerin) 1	1123	ENSG00000128656
ILMN_4120592	0.6934	CHP1	calcineurin-like EF hand protein 1	11261	ENSG00000187446
ILMN_70497	0.7347	CNTNAP2	contactin associated protein-like 2	26047	ENSG00000174469
ILMN_5910301	0.6989	COG1	component of oligomeric golgi complex 1	9382	ENSG00000166685
ILMN_1340750	-0.7366	COMMD5	COMM domain containing 5	28991	ENSG00000170619
ILMN_5860377	0.6631	CORT	cortistatin	1325	ENSG00000241563
ILMN_6290609	-0.7797	CROCC	ciliary rootlet coiled-coil, rootletin	9696	ENSG00000058453
ILMN_5890193	0.7542	CUL3	cullin 3	8452	ENSG00000036257
ILMN_1780463	0.6786	CXADR	coxsackie virus and adenovirus receptor	1525	ENSG00000154639
ILMN_2470433	-0.674	CXXC1	CXXC finger protein 1	30827	ENSG00000154832
ILMN_2450037	0.6642	DDX1	DEAD (Asp-Glu-Ala-Asp) box helicase 1	1653	ENSG00000079785
ILMN_6040309	-0.6798	DGCR8	DiGeorge syndrome critical region gene 8	54487	ENSG00000128191
ILMN_6860082	0.6691	DPY30	dpy-30 homolog (C. elegans)	84661	ENSG00000162961
ILMN_3190168	-0.6829	DTX2	deltex homolog 2 (Drosophila)	113878	ENSG00000091073
ILMN_5900731	0.7617	DYNLL1	dynein, light chain, LC8-type 1	8655	ENSG00000088986
ILMN_4780161	-0.7674	EDC3	enhancer of mRNA decapping 3 homolog (S. cerevisiae)	80153	ENSG00000179151
ILMN_50017	-0.6721	EEF1A1	eukaryotic translation elongation factor 1 alpha 1	1915	ENSG00000156508
ILMN_3940497	0.6928	EHD3	EH-domain containing 3	30845	ENSG00000013016
ILMN_5080368	0.771	ENC1	ectodermal-neural cortex 1 (with BTB-like domain)	8507	ENSG00000171617
ILMN_4280497	0.6658	ERLEC1	endoplasmic reticulum lectin 1	27248	ENSG00000068912
ILMN_3800168	-0.6763	EXOSC2	exosome component 2	23404	ENSG00000130713
ILMN_2360427	0.7058	FABP3	fatty acid binding protein 3, muscle and heart (mammary-derived growth inhibitor)	2170	ENSG00000121769
ILMN_5080079	-0.7114	FANCC	Fanconi anemia, complementation group C	2176	ENSG00000158169
ILMN_5420315	-0.6668	FANCE	Fanconi anemia, complementation group E	2178	ENSG00000112039
ILMN_4010292	0.738	FBXL2	F-box and leucine-rich repeat protein 2	25827	ENSG00000153558
ILMN_5420129	0.7059	FGF12	fibroblast growth factor 12	2257	ENSG00000114279
ILMN_3710086	0.6702	FKBP1B	FK506 binding protein 1B, 12.6 kDa	2281	ENSG00000119782
ILMN_6650541	0.7255	FOXG1	forkhead box G1	2290	ENSG00000176165
ILMN_1230497	0.7059	FRMPD2	FERM and PDZ domain containing 2	143162	ENSG00000170324
ILMN_6040136	0.7532	GAP43	growth associated protein 43	2596	ENSG00000172020
ILMN_6290338	-0.7165	GGT1	gamma-glutamyltransferase 1	2678	ENSG00000100031
ILMN_2690093	0.7029	GHITM	growth hormone inducible transmembrane protein	27069	ENSG00000165678
ILMN_1990632	0.6907	GLRB	glycine receptor, beta	2743	ENSG00000109738
ILMN_6660593	0.6983	GNAS	GNAS complex locus	2778	ENSG00000087460
ILMN_6130279	0.6743	GUCY1B3	guanylate cyclase 1, soluble, beta 3	2983	ENSG00000061918
ILMN_2320593	0.7874	HINT1	histidine triad nucleotide binding protein 1	3094	ENSG00000169567
ILMN_4560433	0.7114	HMP19	HMP19 protein	51617	ENSG00000170091
ILMN_1450528	0.7377	HPRT1	hypoxanthine phosphoribosyltransferase 1	3251	ENSG00000165704
ILMN_3190270	0.681	HSPH1	heat shock 105kDa/110kDa protein 1	10808	ENSG00000120694
ILMN_4780162	-0.6731	HYAL1	hyaluronoglucosaminidase 1	3373	ENSG00000114378
ILMN_6220619	-0.7453	IKBKB	inhibitor of kappa light polypeptide gene enhancer in B-cells, kinase beta	3551	ENSG00000104365
ILMN_6660008	-0.7377	IKZF4	IKAROS family zinc finger 4 (Eos)	64375	ENSG00000123411
ILMN_730398	0.6789	IMP3	IMP3, U3 small nucleolar ribonucleoprotein, homolog (yeast)	55272	NULL
ILMN_2810280	0.7836	ISCU	iron-sulfur cluster scaffold homolog (E. coli)	23479	ENSG00000136003
ILMN_5720100	0.7681	JAKMIP1	janus kinase and microtubule interacting protein 1	152789	ENSG00000152969
ILMN_4230541	-0.7375	KAT6A	K(lysine) acetyltransferase 6A	7994	ENSG00000083168
ILMN_730497	0.6641	KCNJ4	potassium inwardly-rectifying channel, subfamily J, member 4	3761	ENSG00000168135
ILMN_3290092	0.7727	KLB	klotho beta	152831	ENSG00000134962
ILMN_5390156	0.7239	KLHL12	kelch-like 12 (Drosophila)	59349	ENSG00000117153
ILMN_6510075	0.7132	KPNA2	karyopherin alpha 2 (RAG cohort 1, importin alpha 1)	3838	ENSG00000182481
ILMN_5550735	-0.728	LAT	linker for activation of T cells	27040	ENSG00000213658
ILMN_6760133	0.7843	LDB2	LIM domain binding 2	9079	ENSG00000169744
ILMN_5890152	0.7392	LDOC1	leucine zipper, down-regulated in cancer 1	23641	ENSG00000182195
ILMN_6040451	-0.6702	LIMA1	LIM domain and actin binding 1	51474	ENSG00000050405
ILMN_870273	-0.7683	LIME1	Lck interacting transmembrane adaptor 1	54923	ENSG00000203896
ILMN_2810408	0.7043	LINGO1	leucine rich repeat and Ig domain containing 1	84894	ENSG00000169783
ILMN_940114	0.7797	LMO4	LIM domain only 4	8543	ENSG00000143013
ILMN_6400152	0.7331	LNX1	ligand of numb-protein X 1, E3 ubiquitin protein ligase	84708	ENSG00000072201
ILMN_1770519	-0.7455	LRCH4	leucine-rich repeats and calponin homology (CH) domain containing 4	4034	ENSG00000077454
ILMN_2630129	0.6718	MAGED1	melanoma antigen family D, 1	9500	ENSG00000179222
ILMN_1190619	0.6706	MAGEE1	melanoma antigen family E, 1	57692	ENSG00000198934
ILMN_1740347	0.7202	MAP2K1	mitogen-activated protein kinase kinase 1	5604	ENSG00000169032
ILMN_3060600	0.7168	MAP2K4	mitogen-activated protein kinase kinase 4	6416	ENSG00000065559
ILMN_4150167	-0.7527	MAP3K3	mitogen-activated protein kinase kinase kinase 3	4215	ENSG00000198909
ILMN_580471	0.7342	MAPK1	mitogen-activated protein kinase 1	5594	ENSG00000100030
ILMN_940497	0.7503	MAPK10	mitogen-activated protein kinase 10	5602	ENSG00000109339
ILMN_5720139	0.6732	MCF2	MCF.2 cell line derived transforming sequence	4168	ENSG00000101977
ILMN_1980465	0.6758	MEAF6	MYST/Esa1-associated factor 6	64769	ENSG00000163875
ILMN_3450176	0.6743	MEF2C	myocyte enhancer factor 2C	4208	ENSG00000081189
ILMN_2470176	0.8065	MIF	macrophage migration inhibitory factor (glycosylation-inhibiting factor)	4282	ENSG00000240972
ILMN_380239	-0.6709	MKS1	Meckel syndrome, type 1	54903	ENSG00000011143
ILMN_2100286	0.7218	MOAP1	modulator of apoptosis 1	64112	ENSG00000165943
ILMN_2760288	0.6876	MOB4	MOB family member 4, phocein	25843	ENSG00000115540
ILMN_110026	0.6666	MOCS2	molybdenum cofactor synthesis 2	4338	ENSG00000164172
ILMN_5700601	0.6703	MORF4L2	mortality factor 4 like 2	9643	ENSG00000123562
ILMN_6100044	0.7827	MTCH1	mitochondrial carrier 1	23787	ENSG00000137409
ILMN_7000102	-0.7555	MUTYH	mutY homolog (E. coli)	4595	ENSG00000132781
ILMN_3800546	-0.6757	MXD4	MAX dimerization protein 4	10608	ENSG00000123933
ILMN_580044	-0.7525	MZT2B	mitotic spindle organizing protein 2B	80097	ENSG00000152082
ILMN_3840563	0.7391	NCALD	neurocalcin delta	83988	ENSG00000104490
ILMN_3120537	0.7251	NDN	necdin homolog (mouse)	4692	ENSG00000182636
ILMN_3170451	0.7301	NEFM	neurofilament, medium polypeptide	4741	ENSG00000104722
ILMN_70136	0.6918	NELL1	NEL-like 1 (chicken)	4745	ENSG00000165973
ILMN_2970348	0.7689	NELL2	NEL-like 2 (chicken)	4753	ENSG00000184613
ILMN_3780358	0.7168	NGFRAP1	nerve growth factor receptor (TNFRSF16) associated protein 1	27018	ENSG00000166681
ILMN_1780333	0.7631	NME1	NME/NM23 nucleoside diphosphate kinase 1	4830	ENSG00000239672
ILMN_540072	0.6884	NPY	neuropeptide Y	4852	ENSG00000122585
ILMN_3940440	0.8045	NRCAM	neuronal cell adhesion molecule	4897	ENSG00000091129
ILMN_6180181	0.7125	NSF	N-ethylmaleimide-sensitive factor	4905	ENSG00000073969
ILMN_3140369	0.663	NUDT14	nudix (nucleoside diphosphate linked moiety X)-type motif 14	256281	ENSG00000183828
ILMN_1240270	0.6766	NXPH1	neurexophilin 1	30010	ENSG00000122584
ILMN_1090242	0.6826	OLFM1	olfactomedin 1	10439	ENSG00000130558
ILMN_5080142	0.7472	OPA1	optic atrophy 1 (autosomal dominant)	4976	ENSG00000198836
ILMN_3780082	0.6897	PACSIN1	protein kinase C and casein kinase substrate in neurons 1	29993	ENSG00000124507
ILMN_4810181	0.6712	PAK1	p21 protein (Cdc42/Rac)-activated kinase 1	5058	ENSG00000149269
ILMN_5910750	0.7729	PAK3	p21 protein (Cdc42/Rac)-activated kinase 3	5063	ENSG00000077264
ILMN_60056	0.704	PAM	peptidylglycine alpha-amidating monooxygenase	5066	ENSG00000145730
ILMN_3140670	-0.7354	PAX6	paired box 6	5080	ENSG00000007372
ILMN_2340537	0.7399	PCSK2	proprotein convertase subtilisin/kexin type 2	5126	ENSG00000125851
ILMN_5340039	0.7061	PEX11B	peroxisomal biogenesis factor 11 beta	8799	ENSG00000131779
ILMN_5860139	0.6675	PEX19	peroxisomal biogenesis factor 19	5824	ENSG00000162735
ILMN_2640446	0.6674	PFDN1	prefoldin subunit 1	5201	ENSG00000113068
ILMN_6620372	-0.6839	PFKFB4	6-phosphofructo-2-kinase/fructose-2,6-biphosphatase 4	5210	ENSG00000114268
ILMN_4920731	0.7411	PFN2	profilin 2	5217	ENSG00000070087
ILMN_780601	-0.7529	PHKA2	phosphorylase kinase, alpha 2 (liver)	5256	ENSG00000044446
ILMN_5220020	0.6674	PIAS2	protein inhibitor of activated STAT, 2	9063	ENSG00000078043
ILMN_1780685	-0.7377	PIDD	p53-induced death domain protein	55367	ENSG00000177595
ILMN_3130750	0.7021	PIP4K2C	phosphatidylinositol-5-phosphate 4-kinase, type II, gamma	79837	ENSG00000166908
ILMN_780041	0.7852	PLK2	polo-like kinase 2	10769	ENSG00000145632
ILMN_430164	-0.683	PLXNB2	plexin B2	23654	ENSG00000196576
ILMN_5420301	0.6855	PNMA1	paraneoplastic Ma antigen 1	9240	ENSG00000176903
ILMN_670086	0.8216	PNMA2	paraneoplastic Ma antigen 2	10687	ENSG00000240694
ILMN_3290279	-0.7483	POLD1	polymerase (DNA directed), delta 1, catalytic subunit	5424	ENSG00000062822
ILMN_1170100	0.7746	POP4	processing of precursor 4, ribonuclease P/MRP subunit (S. cerevisiae)	10775	ENSG00000105171
ILMN_580270	-0.733	POU2F1	POU class 2 homeobox 1	5451	ENSG00000143190
ILMN_6130022	-0.7058	POU2F2	POU class 2 homeobox 2	5452	ENSG00000028277
ILMN_4230717	0.7399	PPP1R2	protein phosphatase 1, regulatory (inhibitor) subunit 2	5504	ENSG00000184203
ILMN_70066	0.6677	PPP2R2B	protein phosphatase 2, regulatory subunit B, beta	5521	ENSG00000156475
ILMN_50435	0.6932	PPP4R4	protein phosphatase 4, regulatory subunit 4	57718	ENSG00000119698
ILMN_4210575	0.6823	PRKAR2B	protein kinase, cAMP-dependent, regulatory, type II, beta	5577	ENSG00000005249
ILMN_2320484	0.6714	PSMA5	proteasome (prosome, macropain) subunit, alpha type, 5	5686	ENSG00000143106
ILMN_450139	0.6962	PSMG1	proteasome (prosome, macropain) assembly chaperone 1	8624	ENSG00000183527
ILMN_4780156	-0.76	PTBP1	polypyrimidine tract binding protein 1	5725	ENSG00000011304
ILMN_130458	0.7516	PTPRT	protein tyrosine phosphatase, receptor type, T	11122	ENSG00000196090
ILMN_6980280	0.722	PTRH2	peptidyl-tRNA hydrolase 2	51651	ENSG00000141378
ILMN_3170348	0.7814	RAB22A	RAB22A, member RAS oncogene family	57403	ENSG00000124209
ILMN_1850280	0.6987	RAB5A	RAB5A, member RAS oncogene family	5868	ENSG00000144566
ILMN_7050161	0.6692	RAN	RAN, member RAS oncogene family	5901	ENSG00000132341
ILMN_540239	0.7283	RBP4	retinol binding protein 4, plasma	5950	ENSG00000138207
ILMN_2120292	0.7522	REEP1	receptor accessory protein 1	65055	ENSG00000068615
ILMN_5910292	0.6757	REEP5	receptor accessory protein 5	7905	ENSG00000129625
ILMN_7000347	-0.7475	RFX1	regulatory factor X, 1 (influences HLA class II expression)	5989	ENSG00000132005
ILMN_6900066	0.8312	RGS4	regulator of G-protein signaling 4	5999	ENSG00000117152
ILMN_1410156	-0.7377	ROR1	receptor tyrosine kinase-like orphan receptor 1	4919	ENSG00000185483
ILMN_6770563	-0.662	RPS6KA1	ribosomal protein S6 kinase, 90kDa, polypeptide 1	6195	ENSG00000117676
ILMN_4560280	0.751	SCG2	secretogranin II	7857	ENSG00000171951
ILMN_510750	0.7234	SCG5	secretogranin V (7B2 protein)	6447	ENSG00000166922
ILMN_5420048	-0.6905	SEMA6C	sema domain, transmembrane domain (TM), and cytoplasmic domain, (semaphorin) 6C	10500	ENSG00000143434
ILMN_2690324	0.6742	SHOC2	soc-2 suppressor of clear homolog (C. elegans)	8036	ENSG00000108061
ILMN_2450093	0.7061	SLBP	stem-loop binding protein	7884	ENSG00000163950
ILMN_1780750	-0.7279	SLC27A1	solute carrier family 27 (fatty acid transporter), member 1	376497	ENSG00000130304
ILMN_5700685	-0.7176	SMAD5	SMAD family member 5	4090	ENSG00000113658
ILMN_6040113	0.7867	SMYD2	SET and MYND domain containing 2	56950	ENSG00000143499
ILMN_4070292	0.713	SNCA	synuclein, alpha (non A4 component of amyloid precursor)	6622	ENSG00000145335
ILMN_130315	0.6833	SOD1	superoxide dismutase 1, soluble	6647	ENSG00000142168
ILMN_3850324	-0.7118	SORBS3	sorbin and SH3 domain containing 3	10174	ENSG00000120896
ILMN_5340736	-0.6723	SRGAP1	SLIT-ROBO Rho GTPase activating protein 1	57522	ENSG00000196935
ILMN_4670019	0.6707	STAU2	staufen, RNA binding protein, homolog 2 (Drosophila)	27067	ENSG00000040341
ILMN_5550372	0.7186	STK24	serine/threonine kinase 24	8428	ENSG00000102572
ILMN_580075	-0.6701	STK38	serine/threonine kinase 38	11329	ENSG00000112079
ILMN_3450056	0.677	STMN1	stathmin 1	3925	ENSG00000117632
ILMN_6450341	0.6633	STXBP1	syntaxin binding protein 1	6812	ENSG00000136854
ILMN_2510528	-0.678	SUFU	suppressor of fused homolog (Drosophila)	51684	ENSG00000107882
ILMN_3290292	0.7098	SYNGR3	synaptogyrin 3	9143	ENSG00000127561
ILMN_4480735	-0.6997	SYNJ2BP	synaptojanin 2 binding protein	55333	ENSG00000213463
ILMN_6520609	0.6759	SYP	synaptophysin	6855	ENSG00000102003
ILMN_2340301	0.6841	TAX1BP1	Tax1 (human T-cell leukemia virus type I) binding protein 1	8887	ENSG00000106052
ILMN_2900400	-0.6698	TCAP	titin-cap	8557	ENSG00000173991
ILMN_4610154	-0.6687	TGM1	transglutaminase 1 (K polypeptide epidermal type I, protein-glutamine-gamma-glutamyltransferase)	7051	ENSG00000092295
ILMN_4850019	0.7087	THOC7	THO complex 7 homolog (Drosophila)	80145	ENSG00000163634
ILMN_450138	0.6908	TMSB10	thymosin beta 10	9168	ENSG00000034510
ILMN_5570102	-0.7184	TNXB	tenascin XB	7148	ENSG00000168477
ILMN_6100156	0.7037	TOMM20	translocase of outer mitochondrial membrane 20 homolog (yeast)	9804	ENSG00000173726
ILMN_6770575	0.6924	TSPYL5	TSPY-like 5	85453	ENSG00000180543
ILMN_1190129	0.671	TTC1	tetratricopeptide repeat domain 1	7265	ENSG00000113312
ILMN_4670131	0.7123	TUBB4A	tubulin, beta 4A class IVa	10382	ENSG00000104833
ILMN_1980193	0.706	TXN	thioredoxin	7295	ENSG00000136810
ILMN_1690592	0.7559	UBE2N	ubiquitin-conjugating enzyme E2N	7334	ENSG00000177889
ILMN_6040601	0.738	UBE2T	ubiquitin-conjugating enzyme E2T (putative)	29089	ENSG00000077152
ILMN_6980112	0.7717	UCHL1	ubiquitin carboxyl-terminal esterase L1 (ubiquitin thiolesterase)	7345	ENSG00000154277
ILMN_6860014	0.6807	UGP2	UDP-glucose pyrophosphorylase 2	7360	ENSG00000169764
ILMN_5690121	0.7321	VDAC1	voltage-dependent anion channel 1	7416	ENSG00000213585
ILMN_3170332	0.6854	VPS35	vacuolar protein sorting 35 homolog (S. cerevisiae)	55737	ENSG00000069329
ILMN_4850184	0.7446	WASF1	WAS protein family, member 1	8936	ENSG00000112290
ILMN_6040026	0.7254	WASL	Wiskott-Aldrich syndrome-like	8976	ENSG00000106299
ILMN_5570161	-0.6929	WDR6	WD repeat domain 6	11180	ENSG00000178252
ILMN_2060364	-0.6674	WHSC2	Wolf-Hirschhorn syndrome candidate 2	7469	ENSG00000185049
ILMN_4230452	0.7434	YWHAH	tyrosine 3-monooxygenase/tryptophan 5-monooxygenase activation protein, eta polypeptide	7533	ENSG00000128245
ILMN_1990086	0.671	ZNHIT3	zinc finger, HIT-type containing 3	9326	ENSG00000108278
molecular function::hydrolase activity, acting on acid anhydrides, catalyzing transmembrane movement of substances::GO:0016820
C=95;O=10;E=2.67;R=3.74;rawP=0.0003;adjP=0.0121
Probe Set	r (cortex)	Symbol	Name	Entrez ID	Ensemble Gene ID
ILMN_6860717	0.7754	ATP6V1D	ATPase, H+ transporting, lysosomal 34kDa, V1 subunit D	51382	ENSG00000100554
ILMN_5900082	0.748	ATP2A2	ATPase, Ca++ transporting, cardiac muscle, slow twitch 2	488	ENSG00000174437
ILMN_7000692	0.6757	ATP6V1A	ATPase, H+ transporting, lysosomal 70kDa, V1 subunit A	523	ENSG00000114573
ILMN_3710458	0.7219	ATP5C1	ATP synthase, H+ transporting, mitochondrial F1 complex, gamma polypeptide 1	509	ENSG00000165629
ILMN_2570341	0.6724	ATP2C1	ATPase, Ca++ transporting, type 2C, member 1	27032	ENSG00000017260
ILMN_1170113	0.7057	ATP1B1	ATPase, Na+/K+ transporting, beta 1 polypeptide	481	ENSG00000143153
ILMN_770575	0.7431	ATP6V1C1	ATPase, H+ transporting, lysosomal 42kDa, V1 subunit C1	528	ENSG00000155097
ILMN_3990112	0.7882	ATP6V1H	ATPase, H+ transporting, lysosomal 50/57kDa, V1 subunit H	51606	ENSG00000047249
ILMN_5550592	0.6628	ATP6V1B2	ATPase, H+ transporting, lysosomal 56/58kDa, V1 subunit B2	526	ENSG00000147416
ILMN_6130181	0.6782	ATP1A3	ATPase, Na+/K+ transporting, alpha 3 polypeptide	478	ENSG00000105409
molecular function::ATPase activity, coupled to transmembrane movement of substances::GO:0042626
C=92;O=10;E=2.59;R=3.86;rawP=0.0003;adjP=0.0121
Probe Set	r (cortex)	Symbol	Name	Entrez ID	Ensemble Gene ID
ILMN_6860717	0.7754	ATP6V1D	ATPase, H+ transporting, lysosomal 34kDa, V1 subunit D	51382	ENSG00000100554
ILMN_5900082	0.748	ATP2A2	ATPase, Ca++ transporting, cardiac muscle, slow twitch 2	488	ENSG00000174437
ILMN_7000692	0.6757	ATP6V1A	ATPase, H+ transporting, lysosomal 70kDa, V1 subunit A	523	ENSG00000114573
ILMN_3710458	0.7219	ATP5C1	ATP synthase, H+ transporting, mitochondrial F1 complex, gamma polypeptide 1	509	ENSG00000165629
ILMN_2570341	0.6724	ATP2C1	ATPase, Ca++ transporting, type 2C, member 1	27032	ENSG00000017260
ILMN_1170113	0.7057	ATP1B1	ATPase, Na+/K+ transporting, beta 1 polypeptide	481	ENSG00000143153
ILMN_770575	0.7431	ATP6V1C1	ATPase, H+ transporting, lysosomal 42kDa, V1 subunit C1	528	ENSG00000155097
ILMN_3990112	0.7882	ATP6V1H	ATPase, H+ transporting, lysosomal 50/57kDa, V1 subunit H	51606	ENSG00000047249
ILMN_5550592	0.6628	ATP6V1B2	ATPase, H+ transporting, lysosomal 56/58kDa, V1 subunit B2	526	ENSG00000147416
ILMN_6130181	0.6782	ATP1A3	ATPase, Na+/K+ transporting, alpha 3 polypeptide	478	ENSG00000105409
molecular function::ATPase activity, coupled to movement of substances::GO:0043492
C=93;O=10;E=2.62;R=3.82;rawP=0.0003;adjP=0.0121
Probe Set	r (cortex)	Symbol	Name	Entrez ID	Ensemble Gene ID
ILMN_6860717	0.7754	ATP6V1D	ATPase, H+ transporting, lysosomal 34kDa, V1 subunit D	51382	ENSG00000100554
ILMN_5900082	0.748	ATP2A2	ATPase, Ca++ transporting, cardiac muscle, slow twitch 2	488	ENSG00000174437
ILMN_7000692	0.6757	ATP6V1A	ATPase, H+ transporting, lysosomal 70kDa, V1 subunit A	523	ENSG00000114573
ILMN_3710458	0.7219	ATP5C1	ATP synthase, H+ transporting, mitochondrial F1 complex, gamma polypeptide 1	509	ENSG00000165629
ILMN_2570341	0.6724	ATP2C1	ATPase, Ca++ transporting, type 2C, member 1	27032	ENSG00000017260
ILMN_1170113	0.7057	ATP1B1	ATPase, Na+/K+ transporting, beta 1 polypeptide	481	ENSG00000143153
ILMN_770575	0.7431	ATP6V1C1	ATPase, H+ transporting, lysosomal 42kDa, V1 subunit C1	528	ENSG00000155097
ILMN_3990112	0.7882	ATP6V1H	ATPase, H+ transporting, lysosomal 50/57kDa, V1 subunit H	51606	ENSG00000047249
ILMN_5550592	0.6628	ATP6V1B2	ATPase, H+ transporting, lysosomal 56/58kDa, V1 subunit B2	526	ENSG00000147416
ILMN_6130181	0.6782	ATP1A3	ATPase, Na+/K+ transporting, alpha 3 polypeptide	478	ENSG00000105409
cellular component::proton-transporting two-sector ATPase complex::GO:0016469
C=44;O=11;E=1.23;R=8.93;rawP=2.42e-08;adjP=6.90e-06
Probe Set	r (cortex)	Symbol	Name	Entrez ID	Ensemble Gene ID
ILMN_380195	0.6953	ATPIF1	ATPase inhibitory factor 1	93974	ENSG00000130770
ILMN_6860717	0.7754	ATP6V1D	ATPase, H+ transporting, lysosomal 34kDa, V1 subunit D	51382	ENSG00000100554
ILMN_6350400	0.6787	ATP5G3	ATP synthase, H+ transporting, mitochondrial Fo complex, subunit C3 (subunit 9)	518	ENSG00000154518
ILMN_7000692	0.6757	ATP6V1A	ATPase, H+ transporting, lysosomal 70kDa, V1 subunit A	523	ENSG00000114573
ILMN_3710458	0.7219	ATP5C1	ATP synthase, H+ transporting, mitochondrial F1 complex, gamma polypeptide 1	509	ENSG00000165629
ILMN_6020148	0.8006	ATP5H	ATP synthase, H+ transporting, mitochondrial Fo complex, subunit d	10476	ENSG00000167863
ILMN_770575	0.7431	ATP6V1C1	ATPase, H+ transporting, lysosomal 42kDa, V1 subunit C1	528	ENSG00000155097
ILMN_3990112	0.7882	ATP6V1H	ATPase, H+ transporting, lysosomal 50/57kDa, V1 subunit H	51606	ENSG00000047249
ILMN_5550592	0.6628	ATP6V1B2	ATPase, H+ transporting, lysosomal 56/58kDa, V1 subunit B2	526	ENSG00000147416
ILMN_2480068	0.7861	C14orf2	chromosome 14 open reading frame 2	9556	ENSG00000156411
ILMN_5720368	0.6835	ATP5F1	ATP synthase, H+ transporting, mitochondrial Fo complex, subunit B1	515	ENSG00000116459
cellular component::cytoplasm::GO:0005737
C=8425;O=288;E=235.78;R=1.22;rawP=7.77e-08;adjP=1.11e-05
Probe Set	r (cortex)	Symbol	Name	Entrez ID	Ensemble Gene ID
ILMN_4540020	-0.6911	ABHD14B	abhydrolase domain containing 14B	84836	ENSG00000114779
ILMN_5700037	0.6631	ACLY	ATP citrate lyase	47	ENSG00000131473
ILMN_5890139	0.6653	ACOT7	acyl-CoA thioesterase 7	11332	ENSG00000097021
ILMN_2230048	0.7437	ACP1	acid phosphatase 1, soluble	52	ENSG00000143727
ILMN_450594	-0.6875	ACSF2	acyl-CoA synthetase family member 2	80221	ENSG00000167107
ILMN_4610551	-0.7253	ACVR2B	activin A receptor, type IIB	93	ENSG00000114739
ILMN_7050113	-0.6787	AGBL5	ATP/GTP binding protein-like 5	60509	ENSG00000084693
ILMN_1780446	-0.7618	AGER	advanced glycosylation end product-specific receptor	177	ENSG00000204305
ILMN_4780519	0.7147	AGK	acylglycerol kinase	55750	ENSG00000006530
ILMN_5860707	0.7444	AK5	adenylate kinase 5	26289	ENSG00000154027
ILMN_5570750	0.6653	AKAP6	A kinase (PRKA) anchor protein 6	9472	ENSG00000151320
ILMN_4200390	0.6865	ALDOA	aldolase A, fructose-bisphosphate	226	ENSG00000149925
ILMN_2970746	0.674	AP2S1	adaptor-related protein complex 2, sigma 1 subunit	1175	ENSG00000042753
ILMN_6860114	0.7227	AP3S1	adaptor-related protein complex 3, sigma 1 subunit	1176	ENSG00000177879
ILMN_130180	-0.6775	AP5Z1	adaptor-related protein complex 5, zeta 1 subunit	9907	ENSG00000242802
ILMN_580100	-0.6794	APOBEC3A	apolipoprotein B mRNA editing enzyme, catalytic polypeptide-like 3A	200315	ENSG00000128383
ILMN_1090142	-0.732	ARAF	v-raf murine sarcoma 3611 viral oncogene homolog	369	ENSG00000078061
ILMN_840600	0.7189	ARF1	ADP-ribosylation factor 1	375	ENSG00000143761
ILMN_4480601	0.6791	ARF3	ADP-ribosylation factor 3	377	ENSG00000134287
ILMN_3120092	0.7251	ARHGAP32	Rho GTPase activating protein 32	9743	ENSG00000134909
ILMN_6200736	0.682	ARHGEF9	Cdc42 guanine nucleotide exchange factor (GEF) 9	23229	ENSG00000131089
ILMN_2120025	0.747	ARL1	ADP-ribosylation factor-like 1	400	ENSG00000120805
ILMN_6380731	0.6873	ARL8B	ADP-ribosylation factor-like 8B	55207	ENSG00000134108
ILMN_6380047	0.7255	ARPC1A	actin related protein 2/3 complex, subunit 1A, 41kDa	10552	ENSG00000241685
ILMN_460040	-0.7589	ATM	ataxia telangiectasia mutated	472	ENSG00000149311
ILMN_6130181	0.6782	ATP1A3	ATPase, Na+/K+ transporting, alpha 3 polypeptide	478	ENSG00000105409
ILMN_5900082	0.748	ATP2A2	ATPase, Ca++ transporting, cardiac muscle, slow twitch 2	488	ENSG00000174437
ILMN_2570341	0.6724	ATP2C1	ATPase, Ca++ transporting, type 2C, member 1	27032	ENSG00000017260
ILMN_3710458	0.7219	ATP5C1	ATP synthase, H+ transporting, mitochondrial F1 complex, gamma polypeptide 1	509	ENSG00000165629
ILMN_5720368	0.6835	ATP5F1	ATP synthase, H+ transporting, mitochondrial Fo complex, subunit B1	515	ENSG00000116459
ILMN_6350400	0.6787	ATP5G3	ATP synthase, H+ transporting, mitochondrial Fo complex, subunit C3 (subunit 9)	518	ENSG00000154518
ILMN_6020148	0.8006	ATP5H	ATP synthase, H+ transporting, mitochondrial Fo complex, subunit d	10476	ENSG00000167863
ILMN_7000692	0.6757	ATP6V1A	ATPase, H+ transporting, lysosomal 70kDa, V1 subunit A	523	ENSG00000114573
ILMN_5550592	0.6628	ATP6V1B2	ATPase, H+ transporting, lysosomal 56/58kDa, V1 subunit B2	526	ENSG00000147416
ILMN_770575	0.7431	ATP6V1C1	ATPase, H+ transporting, lysosomal 42kDa, V1 subunit C1	528	ENSG00000155097
ILMN_6860717	0.7754	ATP6V1D	ATPase, H+ transporting, lysosomal 34kDa, V1 subunit D	51382	ENSG00000100554
ILMN_3990112	0.7882	ATP6V1H	ATPase, H+ transporting, lysosomal 50/57kDa, V1 subunit H	51606	ENSG00000047249
ILMN_380195	0.6953	ATPIF1	ATPase inhibitory factor 1	93974	ENSG00000130770
ILMN_4010433	0.7402	ATXN10	ataxin 10	25814	ENSG00000130638
ILMN_1770059	0.717	BASP1	brain abundant, membrane attached signal protein 1	10409	ENSG00000176788
ILMN_6650438	0.6998	BEX1	brain expressed, X-linked 1	55859	ENSG00000133169
ILMN_7000433	0.669	BTBD10	BTB (POZ) domain containing 10	84280	ENSG00000148925
ILMN_2480068	0.7861	C14orf2	chromosome 14 open reading frame 2	9556	ENSG00000156411
ILMN_4010672	-0.6968	CACFD1	calcium channel flower domain containing 1	11094	ENSG00000160325
ILMN_4670128	0.7196	CACNG3	calcium channel, voltage-dependent, gamma subunit 3	10368	ENSG00000006116
ILMN_2470435	0.6929	CADPS	Ca++-dependent secretion activator	8618	ENSG00000163618
ILMN_6100019	0.6744	CALM3	calmodulin 3 (phosphorylase kinase, delta)	808	ENSG00000160014
ILMN_5290402	-0.7935	CBR4	carbonyl reductase 4	84869	ENSG00000145439
ILMN_6650170	-0.7158	CCDC88B	coiled-coil domain containing 88B	283234	ENSG00000168071
ILMN_1450673	0.7736	CCNA1	cyclin A1	8900	ENSG00000133101
ILMN_6370156	0.7737	CCND2	cyclin D2	894	ENSG00000118971
ILMN_6900619	0.7077	CCS	copper chaperone for superoxide dismutase	9973	ENSG00000173992
ILMN_2340671	0.6977	CDC42	cell division cycle 42 (GTP binding protein, 25kDa)	998	ENSG00000070831
ILMN_2690133	-0.7298	CEP164	centrosomal protein 164kDa	22897	ENSG00000110274
ILMN_1410575	0.7559	CEP41	centrosomal protein 41kDa	95681	ENSG00000106477
ILMN_1230072	-0.6782	CERS5	ceramide synthase 5	91012	ENSG00000139624
ILMN_4560239	0.6652	CHCHD6	coiled-coil-helix-coiled-coil-helix domain containing 6	84303	ENSG00000159685
ILMN_6130100	0.8286	CHMP4B	charged multivesicular body protein 4B	128866	ENSG00000101421
ILMN_510368	0.7375	CHN1	chimerin (chimaerin) 1	1123	ENSG00000128656
ILMN_4120592	0.6934	CHP1	calcineurin-like EF hand protein 1	11261	ENSG00000187446
ILMN_4810441	0.7013	CHST1	carbohydrate (keratan sulfate Gal-6) sulfotransferase 1	8534	ENSG00000175264
ILMN_60070	-0.758	CHST12	carbohydrate (chondroitin 4) sulfotransferase 12	55501	ENSG00000136213
ILMN_1190097	0.6793	CMC2	COX assembly mitochondrial protein 2 homolog (S. cerevisiae)	56942	ENSG00000103121
ILMN_6380253	-0.7349	CNOT2	CCR4-NOT transcription complex, subunit 2	4848	ENSG00000111596
ILMN_70497	0.7347	CNTNAP2	contactin associated protein-like 2	26047	ENSG00000174469
ILMN_5910301	0.6989	COG1	component of oligomeric golgi complex 1	9382	ENSG00000166685
ILMN_6350731	0.7201	COPG1	coatomer protein complex, subunit gamma 1	22820	ENSG00000181789
ILMN_2510603	0.7038	COPS8	COP9 constitutive photomorphogenic homolog subunit 8 (Arabidopsis)	10920	ENSG00000198612
ILMN_6200408	0.706	COQ10B	coenzyme Q10 homolog B (S. cerevisiae)	80219	ENSG00000115520
ILMN_3170070	0.7387	COX5A	cytochrome c oxidase subunit Va	9377	ENSG00000178741
ILMN_5390010	0.8082	COX6C	cytochrome c oxidase subunit VIc	1345	ENSG00000164919
ILMN_7000497	0.7462	COX7B	cytochrome c oxidase subunit VIIb	1349	ENSG00000131174
ILMN_6290609	-0.7797	CROCC	ciliary rootlet coiled-coil, rootletin	9696	ENSG00000058453
ILMN_3120647	-0.6815	CRYZL1	crystallin, zeta (quinone reductase)-like 1	9946	ENSG00000205758
ILMN_5890193	0.7542	CUL3	cullin 3	8452	ENSG00000036257
ILMN_1780463	0.6786	CXADR	coxsackie virus and adenovirus receptor	1525	ENSG00000154639
ILMN_2650053	0.6836	CYP51A1	cytochrome P450, family 51, subfamily A, polypeptide 1	1595	ENSG00000001630
ILMN_2450037	0.6642	DDX1	DEAD (Asp-Glu-Ala-Asp) box helicase 1	1653	ENSG00000079785
ILMN_1170167	0.7131	DDX25	DEAD (Asp-Glu-Ala-Asp) box helicase 25	29118	ENSG00000109832
ILMN_6040309	-0.6798	DGCR8	DiGeorge syndrome critical region gene 8	54487	ENSG00000128191
ILMN_2370711	0.6992	DGKB	diacylglycerol kinase, beta 90kDa	1607	ENSG00000136267
ILMN_6860082	0.6691	DPY30	dpy-30 homolog (C. elegans)	84661	ENSG00000162961
ILMN_3190168	-0.6829	DTX2	deltex homolog 2 (Drosophila)	113878	ENSG00000091073
ILMN_5900731	0.7617	DYNLL1	dynein, light chain, LC8-type 1	8655	ENSG00000088986
ILMN_4780161	-0.7674	EDC3	enhancer of mRNA decapping 3 homolog (S. cerevisiae)	80153	ENSG00000179151
ILMN_50017	-0.6721	EEF1A1	eukaryotic translation elongation factor 1 alpha 1	1915	ENSG00000156508
ILMN_3940497	0.6928	EHD3	EH-domain containing 3	30845	ENSG00000013016
ILMN_1780397	0.733	EIF1	eukaryotic translation initiation factor 1	10209	ENSG00000173812
ILMN_4480041	0.6673	ELMOD1	ELMO/CED-12 domain containing 1	55531	ENSG00000110675
ILMN_70670	0.6893	EMC4	ER membrane protein complex subunit 4	51234	ENSG00000128463
ILMN_5080368	0.771	ENC1	ectodermal-neural cortex 1 (with BTB-like domain)	8507	ENSG00000171617
ILMN_4280497	0.6658	ERLEC1	endoplasmic reticulum lectin 1	27248	ENSG00000068912
ILMN_2510025	0.6844	EXOC6	exocyst complex component 6	54536	ENSG00000138190
ILMN_3800168	-0.6763	EXOSC2	exosome component 2	23404	ENSG00000130713
ILMN_2360427	0.7058	FABP3	fatty acid binding protein 3, muscle and heart (mammary-derived growth inhibitor)	2170	ENSG00000121769
ILMN_5080079	-0.7114	FANCC	Fanconi anemia, complementation group C	2176	ENSG00000158169
ILMN_5270358	0.7542	FAR2	fatty acyl CoA reductase 2	55711	ENSG00000064763
ILMN_4010292	0.738	FBXL2	F-box and leucine-rich repeat protein 2	25827	ENSG00000153558
ILMN_2100132	-0.6679	FBXO38	F-box protein 38	81545	ENSG00000145868
ILMN_3710086	0.6702	FKBP1B	FK506 binding protein 1B, 12.6 kDa	2281	ENSG00000119782
ILMN_1230497	0.7059	FRMPD2	FERM and PDZ domain containing 2	143162	ENSG00000170324
ILMN_2690093	0.7029	GHITM	growth hormone inducible transmembrane protein	27069	ENSG00000165678
ILMN_6660593	0.6983	GNAS	GNAS complex locus	2778	ENSG00000087460
ILMN_6590725	0.7302	GOT1	glutamic-oxaloacetic transaminase 1, soluble (aspartate aminotransferase 1)	2805	ENSG00000120053
ILMN_3520039	-0.6691	GRIN2C	glutamate receptor, ionotropic, N-methyl D-aspartate 2C	2905	ENSG00000161509
ILMN_6370504	0.6975	GRSF1	G-rich RNA sequence binding factor 1	2926	ENSG00000132463
ILMN_6130279	0.6743	GUCY1B3	guanylate cyclase 1, soluble, beta 3	2983	ENSG00000061918
ILMN_5900008	0.7398	HAGH	hydroxyacylglutathione hydrolase	3029	ENSG00000063854
ILMN_630047	-0.7474	HEXDC	hexosaminidase (glycosyl hydrolase family 20, catalytic domain) containing	284004	ENSG00000169660
ILMN_2320593	0.7874	HINT1	histidine triad nucleotide binding protein 1	3094	ENSG00000169567
ILMN_4560433	0.7114	HMP19	HMP19 protein	51617	ENSG00000170091
ILMN_1450528	0.7377	HPRT1	hypoxanthine phosphoribosyltransferase 1	3251	ENSG00000165704
ILMN_70452	0.6955	HSPB3	heat shock 27kDa protein 3	8988	ENSG00000169271
ILMN_3190270	0.681	HSPH1	heat shock 105kDa/110kDa protein 1	10808	ENSG00000120694
ILMN_4780162	-0.6731	HYAL1	hyaluronoglucosaminidase 1	3373	ENSG00000114378
ILMN_6220619	-0.7453	IKBKB	inhibitor of kappa light polypeptide gene enhancer in B-cells, kinase beta	3551	ENSG00000104365
ILMN_2810280	0.7836	ISCU	iron-sulfur cluster scaffold homolog (E. coli)	23479	ENSG00000136003
ILMN_5720100	0.7681	JAKMIP1	janus kinase and microtubule interacting protein 1	152789	ENSG00000152969
ILMN_4730041	0.6807	KALRN	kalirin, RhoGEF kinase	8997	ENSG00000160145
ILMN_730497	0.6641	KCNJ4	potassium inwardly-rectifying channel, subfamily J, member 4	3761	ENSG00000168135
ILMN_6650162	-0.6628	KIAA1683	KIAA1683	80726	ENSG00000130518
ILMN_5390156	0.7239	KLHL12	kelch-like 12 (Drosophila)	59349	ENSG00000117153
ILMN_6510075	0.7132	KPNA2	karyopherin alpha 2 (RAG cohort 1, importin alpha 1)	3838	ENSG00000182481
ILMN_1240520	0.7185	LANCL2	LanC lantibiotic synthetase component C-like 2 (bacterial)	55915	ENSG00000132434
ILMN_2470121	-0.6732	LEPREL2	leprecan-like 2	10536	ENSG00000110811
ILMN_6040451	-0.6702	LIMA1	LIM domain and actin binding 1	51474	ENSG00000050405
ILMN_7040465	-0.672	LIPT1	lipoyltransferase 1	51601	ENSG00000144182
ILMN_6400152	0.7331	LNX1	ligand of numb-protein X 1, E3 ubiquitin protein ligase	84708	ENSG00000072201
ILMN_2630129	0.6718	MAGED1	melanoma antigen family D, 1	9500	ENSG00000179222
ILMN_1190619	0.6706	MAGEE1	melanoma antigen family E, 1	57692	ENSG00000198934
ILMN_5360711	0.6645	MALSU1	mitochondrial assembly of ribosomal large subunit 1	115416	ENSG00000156928
ILMN_1740347	0.7202	MAP2K1	mitogen-activated protein kinase kinase 1	5604	ENSG00000169032
ILMN_3060600	0.7168	MAP2K4	mitogen-activated protein kinase kinase 4	6416	ENSG00000065559
ILMN_4150167	-0.7527	MAP3K3	mitogen-activated protein kinase kinase kinase 3	4215	ENSG00000198909
ILMN_580471	0.7342	MAPK1	mitogen-activated protein kinase 1	5594	ENSG00000100030
ILMN_940497	0.7503	MAPK10	mitogen-activated protein kinase 10	5602	ENSG00000109339
ILMN_5720139	0.6732	MCF2	MCF.2 cell line derived transforming sequence	4168	ENSG00000101977
ILMN_2850398	0.7321	MCTS1	malignant T cell amplified sequence 1	28985	ENSG00000232119
ILMN_430131	0.754	MDH1	malate dehydrogenase 1, NAD (soluble)	4190	ENSG00000014641
ILMN_1980465	0.6758	MEAF6	MYST/Esa1-associated factor 6	64769	ENSG00000163875
ILMN_3450176	0.6743	MEF2C	myocyte enhancer factor 2C	4208	ENSG00000081189
ILMN_610279	1	MGST3	microsomal glutathione S-transferase 3	4259	ENSG00000143198
ILMN_2470176	0.8065	MIF	macrophage migration inhibitory factor (glycosylation-inhibiting factor)	4282	ENSG00000240972
ILMN_1940551	-0.7259	MKNK2	MAP kinase interacting serine/threonine kinase 2	2872	ENSG00000099875
ILMN_380239	-0.6709	MKS1	Meckel syndrome, type 1	54903	ENSG00000011143
ILMN_2100286	0.7218	MOAP1	modulator of apoptosis 1	64112	ENSG00000165943
ILMN_2760288	0.6876	MOB4	MOB family member 4, phocein	25843	ENSG00000115540
ILMN_110026	0.6666	MOCS2	molybdenum cofactor synthesis 2	4338	ENSG00000164172
ILMN_840021	0.6705	MPC2	mitochondrial pyruvate carrier 2	25874	ENSG00000143158
ILMN_7000315	0.7764	MRPL15	mitochondrial ribosomal protein L15	29088	ENSG00000137547
ILMN_3610338	0.68	MRPS23	mitochondrial ribosomal protein S23	51649	ENSG00000181610
ILMN_6040193	0.7142	MRPS30	mitochondrial ribosomal protein S30	10884	ENSG00000112996
ILMN_6100044	0.7827	MTCH1	mitochondrial carrier 1	23787	ENSG00000137409
ILMN_6860537	0.7262	MTX2	metaxin 2	10651	ENSG00000128654
ILMN_7000102	-0.7555	MUTYH	mutY homolog (E. coli)	4595	ENSG00000132781
ILMN_580044	-0.7525	MZT2B	mitotic spindle organizing protein 2B	80097	ENSG00000152082
ILMN_3840563	0.7391	NCALD	neurocalcin delta	83988	ENSG00000104490
ILMN_5290181	0.6922	NCEH1	neutral cholesterol ester hydrolase 1	57552	ENSG00000144959
ILMN_3120537	0.7251	NDN	necdin homolog (mouse)	4692	ENSG00000182636
ILMN_5890647	0.7027	NDUFA8	NADH dehydrogenase (ubiquinone) 1 alpha subcomplex, 8, 19kDa	4702	ENSG00000119421
ILMN_5220377	0.7577	NDUFB1	NADH dehydrogenase (ubiquinone) 1 beta subcomplex, 1, 7kDa	4707	ENSG00000183648
ILMN_5890048	0.6779	NDUFB5	NADH dehydrogenase (ubiquinone) 1 beta subcomplex, 5, 16kDa	4711	ENSG00000136521
ILMN_3170451	0.7301	NEFM	neurofilament, medium polypeptide	4741	ENSG00000104722
ILMN_70136	0.6918	NELL1	NEL-like 1 (chicken)	4745	ENSG00000165973
ILMN_7000735	0.7484	NGEF	neuronal guanine nucleotide exchange factor	25791	ENSG00000066248
ILMN_3780358	0.7168	NGFRAP1	nerve growth factor receptor (TNFRSF16) associated protein 1	27018	ENSG00000166681
ILMN_4060253	-0.7062	NINL	ninein-like	22981	ENSG00000101004
ILMN_1780333	0.7631	NME1	NME/NM23 nucleoside diphosphate kinase 1	4830	ENSG00000239672
ILMN_6020068	0.6619	NRBF2	nuclear receptor binding factor 2	29982	ENSG00000148572
ILMN_5220136	0.6749	NRSN1	neurensin 1	140767	ENSG00000152954
ILMN_6180181	0.7125	NSF	N-ethylmaleimide-sensitive factor	4905	ENSG00000073969
ILMN_7050176	0.6767	NT5DC3	5'-nucleotidase domain containing 3	51559	ENSG00000111696
ILMN_2850128	0.7258	NUDT11	nudix (nucleoside diphosphate linked moiety X)-type motif 11	55190	ENSG00000196368
ILMN_3140369	0.663	NUDT14	nudix (nucleoside diphosphate linked moiety X)-type motif 14	256281	ENSG00000183828
ILMN_3940538	0.6976	NUDT4	nudix (nucleoside diphosphate linked moiety X)-type motif 4	11163	ENSG00000173598
ILMN_5050091	0.7728	OAT	ornithine aminotransferase	4942	ENSG00000065154
ILMN_1090242	0.6826	OLFM1	olfactomedin 1	10439	ENSG00000130558
ILMN_5080142	0.7472	OPA1	optic atrophy 1 (autosomal dominant)	4976	ENSG00000198836
ILMN_3780082	0.6897	PACSIN1	protein kinase C and casein kinase substrate in neurons 1	29993	ENSG00000124507
ILMN_4810181	0.6712	PAK1	p21 protein (Cdc42/Rac)-activated kinase 1	5058	ENSG00000149269
ILMN_5910750	0.7729	PAK3	p21 protein (Cdc42/Rac)-activated kinase 3	5063	ENSG00000077264
ILMN_60056	0.704	PAM	peptidylglycine alpha-amidating monooxygenase	5066	ENSG00000145730
ILMN_3140670	-0.7354	PAX6	paired box 6	5080	ENSG00000007372
ILMN_1240711	-0.6919	PCBP4	poly(rC) binding protein 4	57060	ENSG00000090097
ILMN_3990347	0.6698	PCMT1	protein-L-isoaspartate (D-aspartate) O-methyltransferase	5110	ENSG00000120265
ILMN_2340537	0.7399	PCSK2	proprotein convertase subtilisin/kexin type 2	5126	ENSG00000125851
ILMN_6200072	0.731	PDHB	pyruvate dehydrogenase (lipoamide) beta	5162	ENSG00000168291
ILMN_4540671	0.6781	PET112	PET112 homolog (yeast)	5188	ENSG00000059691
ILMN_5340039	0.7061	PEX11B	peroxisomal biogenesis factor 11 beta	8799	ENSG00000131779
ILMN_5860139	0.6675	PEX19	peroxisomal biogenesis factor 19	5824	ENSG00000162735
ILMN_2640446	0.6674	PFDN1	prefoldin subunit 1	5201	ENSG00000113068
ILMN_6620372	-0.6839	PFKFB4	6-phosphofructo-2-kinase/fructose-2,6-biphosphatase 4	5210	ENSG00000114268
ILMN_4920731	0.7411	PFN2	profilin 2	5217	ENSG00000070087
ILMN_2100092	0.7707	PGM2L1	phosphoglucomutase 2-like 1	283209	ENSG00000165434
ILMN_780601	-0.7529	PHKA2	phosphorylase kinase, alpha 2 (liver)	5256	ENSG00000044446
ILMN_1190181	0.7232	PHYHIPL	phytanoyl-CoA 2-hydroxylase interacting protein-like	84457	ENSG00000165443
ILMN_1780685	-0.7377	PIDD	p53-induced death domain protein	55367	ENSG00000177595
ILMN_6020050	0.6614	PIGY	phosphatidylinositol glycan anchor biosynthesis, class Y	84992	ENSG00000145337
ILMN_3130750	0.7021	PIP4K2C	phosphatidylinositol-5-phosphate 4-kinase, type II, gamma	79837	ENSG00000166908
ILMN_780041	0.7852	PLK2	polo-like kinase 2	10769	ENSG00000145632
ILMN_5420301	0.6855	PNMA1	paraneoplastic Ma antigen 1	9240	ENSG00000176903
ILMN_5360040	-0.6833	POMT2	protein-O-mannosyltransferase 2	29954	ENSG00000009830
ILMN_6130022	-0.7058	POU2F2	POU class 2 homeobox 2	5452	ENSG00000028277
ILMN_780731	0.7132	PPP1R11	protein phosphatase 1, regulatory (inhibitor) subunit 11	6992	ENSG00000204619
ILMN_6980253	0.6862	PPP1R14C	protein phosphatase 1, regulatory (inhibitor) subunit 14C	81706	ENSG00000198729
ILMN_70066	0.6677	PPP2R2B	protein phosphatase 2, regulatory subunit B, beta	5521	ENSG00000156475
ILMN_50435	0.6932	PPP4R4	protein phosphatase 4, regulatory subunit 4	57718	ENSG00000119698
ILMN_3130520	-0.6893	PRDM2	PR domain containing 2, with ZNF domain	7799	ENSG00000116731
ILMN_4210575	0.6823	PRKAR2B	protein kinase, cAMP-dependent, regulatory, type II, beta	5577	ENSG00000005249
ILMN_6770324	0.745	PRMT3	protein arginine methyltransferase 3	10196	ENSG00000185238
ILMN_2320484	0.6714	PSMA5	proteasome (prosome, macropain) subunit, alpha type, 5	5686	ENSG00000143106
ILMN_450139	0.6962	PSMG1	proteasome (prosome, macropain) assembly chaperone 1	8624	ENSG00000183527
ILMN_380292	-0.6993	PTDSS2	phosphatidylserine synthase 2	81490	ENSG00000174915
ILMN_4200446	0.8497	PTPRN2	protein tyrosine phosphatase, receptor type, N polypeptide 2	5799	ENSG00000155093
ILMN_6980280	0.722	PTRH2	peptidyl-tRNA hydrolase 2	51651	ENSG00000141378
ILMN_3870402	-0.6748	QTRTD1	queuine tRNA-ribosyltransferase domain containing 1	79691	ENSG00000151576
ILMN_5670092	0.673	RAB1A	RAB1A, member RAS oncogene family	5861	ENSG00000138069
ILMN_3170348	0.7814	RAB22A	RAB22A, member RAS oncogene family	57403	ENSG00000124209
ILMN_1850280	0.6987	RAB5A	RAB5A, member RAS oncogene family	5868	ENSG00000144566
ILMN_7050161	0.6692	RAN	RAN, member RAS oncogene family	5901	ENSG00000132341
ILMN_4150300	-0.6618	RBM38	RNA binding motif protein 38	55544	ENSG00000132819
ILMN_2680487	0.7294	RC3H1	ring finger and CCCH-type domains 1	149041	ENSG00000135870
ILMN_2850541	-0.676	RDH5	retinol dehydrogenase 5 (11-cis/9-cis)	5959	ENSG00000135437
ILMN_7050164	-0.6658	RECQL4	RecQ protein-like 4	9401	NULL
ILMN_2120292	0.7522	REEP1	receptor accessory protein 1	65055	ENSG00000068615
ILMN_6900066	0.8312	RGS4	regulator of G-protein signaling 4	5999	ENSG00000117152
ILMN_5390181	0.7302	RGS6	regulator of G-protein signaling 6	9628	ENSG00000182732
ILMN_1410156	-0.7377	ROR1	receptor tyrosine kinase-like orphan receptor 1	4919	ENSG00000185483
ILMN_2680315	0.6831	RPL26L1	ribosomal protein L26-like 1	51121	ENSG00000037241
ILMN_6770563	-0.662	RPS6KA1	ribosomal protein S6 kinase, 90kDa, polypeptide 1	6195	ENSG00000117676
ILMN_840731	-0.6716	RSU1	Ras suppressor protein 1	6251	ENSG00000148484
ILMN_6200301	0.7764	RTN3	reticulon 3	10313	ENSG00000133318
ILMN_2690450	0.6798	RTN4IP1	reticulon 4 interacting protein 1	84816	ENSG00000130347
ILMN_2510441	0.7157	SATB2	SATB homeobox 2	23314	ENSG00000119042
ILMN_6350746	0.6615	SC5DL	sterol-C5-desaturase (ERG3 delta-5-desaturase homolog, S. cerevisiae)-like	6309	ENSG00000109929
ILMN_4560280	0.751	SCG2	secretogranin II	7857	ENSG00000171951
ILMN_510750	0.7234	SCG5	secretogranin V (7B2 protein)	6447	ENSG00000166922
ILMN_2690324	0.6742	SHOC2	soc-2 suppressor of clear homolog (C. elegans)	8036	ENSG00000108061
ILMN_2450093	0.7061	SLBP	stem-loop binding protein	7884	ENSG00000163950
ILMN_6400577	0.679	SLC17A7	solute carrier family 17 (sodium-dependent inorganic phosphate cotransporter), member 7	57030	ENSG00000104888
ILMN_1780750	-0.7279	SLC27A1	solute carrier family 27 (fatty acid transporter), member 1	376497	ENSG00000130304
ILMN_6550047	0.7099	SLC30A3	solute carrier family 30 (zinc transporter), member 3	7781	ENSG00000115194
ILMN_1050056	0.7838	SLC9A6	solute carrier family 9, subfamily A (NHE6, cation proton antiporter 6), member 6	10479	ENSG00000198689
ILMN_110520	0.6918	SLIRP	SRA stem-loop interacting RNA binding protein	81892	ENSG00000119705
ILMN_5700685	-0.7176	SMAD5	SMAD family member 5	4090	ENSG00000113658
ILMN_6040113	0.7867	SMYD2	SET and MYND domain containing 2	56950	ENSG00000143499
ILMN_4070292	0.713	SNCA	synuclein, alpha (non A4 component of amyloid precursor)	6622	ENSG00000145335
ILMN_6400025	0.6991	SNX10	sorting nexin 10	29887	ENSG00000086300
ILMN_130315	0.6833	SOD1	superoxide dismutase 1, soluble	6647	ENSG00000142168
ILMN_3850324	-0.7118	SORBS3	sorbin and SH3 domain containing 3	10174	ENSG00000120896
ILMN_7100338	0.6961	SRD5A1	steroid-5-alpha-reductase, alpha polypeptide 1 (3-oxo-5 alpha-steroid delta 4-dehydrogenase alpha 1)	6715	ENSG00000145545
ILMN_5340736	-0.6723	SRGAP1	SLIT-ROBO Rho GTPase activating protein 1	57522	ENSG00000196935
ILMN_4120717	0.7359	STAR	steroidogenic acute regulatory protein	6770	ENSG00000147465
ILMN_4670019	0.6707	STAU2	staufen, RNA binding protein, homolog 2 (Drosophila)	27067	ENSG00000040341
ILMN_5550372	0.7186	STK24	serine/threonine kinase 24	8428	ENSG00000102572
ILMN_580075	-0.6701	STK38	serine/threonine kinase 38	11329	ENSG00000112079
ILMN_3450056	0.677	STMN1	stathmin 1	3925	ENSG00000117632
ILMN_6450341	0.6633	STXBP1	syntaxin binding protein 1	6812	ENSG00000136854
ILMN_2510528	-0.678	SUFU	suppressor of fused homolog (Drosophila)	51684	ENSG00000107882
ILMN_3290292	0.7098	SYNGR3	synaptogyrin 3	9143	ENSG00000127561
ILMN_4480735	-0.6997	SYNJ2BP	synaptojanin 2 binding protein	55333	ENSG00000213463
ILMN_6520609	0.6759	SYP	synaptophysin	6855	ENSG00000102003
ILMN_2340301	0.6841	TAX1BP1	Tax1 (human T-cell leukemia virus type I) binding protein 1	8887	ENSG00000106052
ILMN_5890167	-0.7121	TAZ	tafazzin	6901	ENSG00000102125
ILMN_2900400	-0.6698	TCAP	titin-cap	8557	ENSG00000173991
ILMN_4850019	0.7087	THOC7	THO complex 7 homolog (Drosophila)	80145	ENSG00000163634
ILMN_3450685	0.7051	TMEM130	transmembrane protein 130	222865	ENSG00000166448
ILMN_450138	0.6908	TMSB10	thymosin beta 10	9168	ENSG00000034510
ILMN_6100156	0.7037	TOMM20	translocase of outer mitochondrial membrane 20 homolog (yeast)	9804	ENSG00000173726
ILMN_1190129	0.671	TTC1	tetratricopeptide repeat domain 1	7265	ENSG00000113312
ILMN_4670131	0.7123	TUBB4A	tubulin, beta 4A class IVa	10382	ENSG00000104833
ILMN_5360722	0.7527	TUSC2	tumor suppressor candidate 2	11334	ENSG00000114383
ILMN_1980193	0.706	TXN	thioredoxin	7295	ENSG00000136810
ILMN_1690592	0.7559	UBE2N	ubiquitin-conjugating enzyme E2N	7334	ENSG00000177889
ILMN_4760504	0.6648	UBL5	ubiquitin-like 5	59286	ENSG00000198258
ILMN_6980112	0.7717	UCHL1	ubiquitin carboxyl-terminal esterase L1 (ubiquitin thiolesterase)	7345	ENSG00000154277
ILMN_6860014	0.6807	UGP2	UDP-glucose pyrophosphorylase 2	7360	ENSG00000169764
ILMN_5270164	0.6912	UQCR11	ubiquinol-cytochrome c reductase, complex III subunit XI	10975	ENSG00000127540
ILMN_5050064	0.7434	UQCRQ	ubiquinol-cytochrome c reductase, complex III subunit VII, 9.5kDa	27089	ENSG00000164405
ILMN_1850309	-0.6611	VARS2	valyl-tRNA synthetase 2, mitochondrial (putative)	57176	ENSG00000137411
ILMN_5690121	0.7321	VDAC1	voltage-dependent anion channel 1	7416	ENSG00000213585
ILMN_3170332	0.6854	VPS35	vacuolar protein sorting 35 homolog (S. cerevisiae)	55737	ENSG00000069329
ILMN_4850184	0.7446	WASF1	WAS protein family, member 1	8936	ENSG00000112290
ILMN_6040026	0.7254	WASL	Wiskott-Aldrich syndrome-like	8976	ENSG00000106299
ILMN_5570161	-0.6929	WDR6	WD repeat domain 6	11180	ENSG00000178252
ILMN_3800270	-0.6705	XPNPEP3	X-prolyl aminopeptidase (aminopeptidase P) 3, putative	63929	ENSG00000196236
ILMN_4230452	0.7434	YWHAH	tyrosine 3-monooxygenase/tryptophan 5-monooxygenase activation protein, eta polypeptide	7533	ENSG00000128245
ILMN_4780048	-0.6815	ZNF175	zinc finger protein 175	7728	ENSG00000105497
cellular component::mitochondrion::GO:0005739
C=1409;O=72;E=39.43;R=1.83;rawP=3.22e-07;adjP=3.06e-05
Probe Set	r (cortex)	Symbol	Name	Entrez ID	Ensemble Gene ID
ILMN_5700037	0.6631	ACLY	ATP citrate lyase	47	ENSG00000131473
ILMN_5890139	0.6653	ACOT7	acyl-CoA thioesterase 7	11332	ENSG00000097021
ILMN_450594	-0.6875	ACSF2	acyl-CoA synthetase family member 2	80221	ENSG00000167107
ILMN_4780519	0.7147	AGK	acylglycerol kinase	55750	ENSG00000006530
ILMN_1090142	-0.732	ARAF	v-raf murine sarcoma 3611 viral oncogene homolog	369	ENSG00000078061
ILMN_3710458	0.7219	ATP5C1	ATP synthase, H+ transporting, mitochondrial F1 complex, gamma polypeptide 1	509	ENSG00000165629
ILMN_5720368	0.6835	ATP5F1	ATP synthase, H+ transporting, mitochondrial Fo complex, subunit B1	515	ENSG00000116459
ILMN_6350400	0.6787	ATP5G3	ATP synthase, H+ transporting, mitochondrial Fo complex, subunit C3 (subunit 9)	518	ENSG00000154518
ILMN_6020148	0.8006	ATP5H	ATP synthase, H+ transporting, mitochondrial Fo complex, subunit d	10476	ENSG00000167863
ILMN_7000692	0.6757	ATP6V1A	ATPase, H+ transporting, lysosomal 70kDa, V1 subunit A	523	ENSG00000114573
ILMN_380195	0.6953	ATPIF1	ATPase inhibitory factor 1	93974	ENSG00000130770
ILMN_2480068	0.7861	C14orf2	chromosome 14 open reading frame 2	9556	ENSG00000156411
ILMN_5290402	-0.7935	CBR4	carbonyl reductase 4	84869	ENSG00000145439
ILMN_6900619	0.7077	CCS	copper chaperone for superoxide dismutase	9973	ENSG00000173992
ILMN_4560239	0.6652	CHCHD6	coiled-coil-helix-coiled-coil-helix domain containing 6	84303	ENSG00000159685
ILMN_1190097	0.6793	CMC2	COX assembly mitochondrial protein 2 homolog (S. cerevisiae)	56942	ENSG00000103121
ILMN_6200408	0.706	COQ10B	coenzyme Q10 homolog B (S. cerevisiae)	80219	ENSG00000115520
ILMN_3170070	0.7387	COX5A	cytochrome c oxidase subunit Va	9377	ENSG00000178741
ILMN_5390010	0.8082	COX6C	cytochrome c oxidase subunit VIc	1345	ENSG00000164919
ILMN_7000497	0.7462	COX7B	cytochrome c oxidase subunit VIIb	1349	ENSG00000131174
ILMN_5900731	0.7617	DYNLL1	dynein, light chain, LC8-type 1	8655	ENSG00000088986
ILMN_2690093	0.7029	GHITM	growth hormone inducible transmembrane protein	27069	ENSG00000165678
ILMN_6370504	0.6975	GRSF1	G-rich RNA sequence binding factor 1	2926	ENSG00000132463
ILMN_5900008	0.7398	HAGH	hydroxyacylglutathione hydrolase	3029	ENSG00000063854
ILMN_2810280	0.7836	ISCU	iron-sulfur cluster scaffold homolog (E. coli)	23479	ENSG00000136003
ILMN_6650162	-0.6628	KIAA1683	KIAA1683	80726	ENSG00000130518
ILMN_7040465	-0.672	LIPT1	lipoyltransferase 1	51601	ENSG00000144182
ILMN_5360711	0.6645	MALSU1	mitochondrial assembly of ribosomal large subunit 1	115416	ENSG00000156928
ILMN_1740347	0.7202	MAP2K1	mitogen-activated protein kinase kinase 1	5604	ENSG00000169032
ILMN_580471	0.7342	MAPK1	mitogen-activated protein kinase 1	5594	ENSG00000100030
ILMN_940497	0.7503	MAPK10	mitogen-activated protein kinase 10	5602	ENSG00000109339
ILMN_840021	0.6705	MPC2	mitochondrial pyruvate carrier 2	25874	ENSG00000143158
ILMN_7000315	0.7764	MRPL15	mitochondrial ribosomal protein L15	29088	ENSG00000137547
ILMN_3610338	0.68	MRPS23	mitochondrial ribosomal protein S23	51649	ENSG00000181610
ILMN_6040193	0.7142	MRPS30	mitochondrial ribosomal protein S30	10884	ENSG00000112996
ILMN_6100044	0.7827	MTCH1	mitochondrial carrier 1	23787	ENSG00000137409
ILMN_6860537	0.7262	MTX2	metaxin 2	10651	ENSG00000128654
ILMN_7000102	-0.7555	MUTYH	mutY homolog (E. coli)	4595	ENSG00000132781
ILMN_5890647	0.7027	NDUFA8	NADH dehydrogenase (ubiquinone) 1 alpha subcomplex, 8, 19kDa	4702	ENSG00000119421
ILMN_5220377	0.7577	NDUFB1	NADH dehydrogenase (ubiquinone) 1 beta subcomplex, 1, 7kDa	4707	ENSG00000183648
ILMN_5890048	0.6779	NDUFB5	NADH dehydrogenase (ubiquinone) 1 beta subcomplex, 5, 16kDa	4711	ENSG00000136521
ILMN_7050176	0.6767	NT5DC3	5'-nucleotidase domain containing 3	51559	ENSG00000111696
ILMN_5050091	0.7728	OAT	ornithine aminotransferase	4942	ENSG00000065154
ILMN_5080142	0.7472	OPA1	optic atrophy 1 (autosomal dominant)	4976	ENSG00000198836
ILMN_6200072	0.731	PDHB	pyruvate dehydrogenase (lipoamide) beta	5162	ENSG00000168291
ILMN_4540671	0.6781	PET112	PET112 homolog (yeast)	5188	ENSG00000059691
ILMN_5340039	0.7061	PEX11B	peroxisomal biogenesis factor 11 beta	8799	ENSG00000131779
ILMN_1190181	0.7232	PHYHIPL	phytanoyl-CoA 2-hydroxylase interacting protein-like	84457	ENSG00000165443
ILMN_70066	0.6677	PPP2R2B	protein phosphatase 2, regulatory subunit B, beta	5521	ENSG00000156475
ILMN_4210575	0.6823	PRKAR2B	protein kinase, cAMP-dependent, regulatory, type II, beta	5577	ENSG00000005249
ILMN_6980280	0.722	PTRH2	peptidyl-tRNA hydrolase 2	51651	ENSG00000141378
ILMN_3870402	-0.6748	QTRTD1	queuine tRNA-ribosyltransferase domain containing 1	79691	ENSG00000151576
ILMN_2120292	0.7522	REEP1	receptor accessory protein 1	65055	ENSG00000068615
ILMN_2690450	0.6798	RTN4IP1	reticulon 4 interacting protein 1	84816	ENSG00000130347
ILMN_1780750	-0.7279	SLC27A1	solute carrier family 27 (fatty acid transporter), member 1	376497	ENSG00000130304
ILMN_1050056	0.7838	SLC9A6	solute carrier family 9, subfamily A (NHE6, cation proton antiporter 6), member 6	10479	ENSG00000198689
ILMN_110520	0.6918	SLIRP	SRA stem-loop interacting RNA binding protein	81892	ENSG00000119705
ILMN_4070292	0.713	SNCA	synuclein, alpha (non A4 component of amyloid precursor)	6622	ENSG00000145335
ILMN_130315	0.6833	SOD1	superoxide dismutase 1, soluble	6647	ENSG00000142168
ILMN_4120717	0.7359	STAR	steroidogenic acute regulatory protein	6770	ENSG00000147465
ILMN_6450341	0.6633	STXBP1	syntaxin binding protein 1	6812	ENSG00000136854
ILMN_4480735	-0.6997	SYNJ2BP	synaptojanin 2 binding protein	55333	ENSG00000213463
ILMN_5890167	-0.7121	TAZ	tafazzin	6901	ENSG00000102125
ILMN_6100156	0.7037	TOMM20	translocase of outer mitochondrial membrane 20 homolog (yeast)	9804	ENSG00000173726
ILMN_5360722	0.7527	TUSC2	tumor suppressor candidate 2	11334	ENSG00000114383
ILMN_1980193	0.706	TXN	thioredoxin	7295	ENSG00000136810
ILMN_5270164	0.6912	UQCR11	ubiquinol-cytochrome c reductase, complex III subunit XI	10975	ENSG00000127540
ILMN_5050064	0.7434	UQCRQ	ubiquinol-cytochrome c reductase, complex III subunit VII, 9.5kDa	27089	ENSG00000164405
ILMN_1850309	-0.6611	VARS2	valyl-tRNA synthetase 2, mitochondrial (putative)	57176	ENSG00000137411
ILMN_5690121	0.7321	VDAC1	voltage-dependent anion channel 1	7416	ENSG00000213585
ILMN_4850184	0.7446	WASF1	WAS protein family, member 1	8936	ENSG00000112290
ILMN_3800270	-0.6705	XPNPEP3	X-prolyl aminopeptidase (aminopeptidase P) 3, putative	63929	ENSG00000196236
cellular component::cytoplasmic part::GO:0044444
C=6312;O=226;E=176.64;R=1.28;rawP=5.66e-07;adjP=4.03e-05
Probe Set	r (cortex)	Symbol	Name	Entrez ID	Ensemble Gene ID
ILMN_5700037	0.6631	ACLY	ATP citrate lyase	47	ENSG00000131473
ILMN_5890139	0.6653	ACOT7	acyl-CoA thioesterase 7	11332	ENSG00000097021
ILMN_450594	-0.6875	ACSF2	acyl-CoA synthetase family member 2	80221	ENSG00000167107
ILMN_7050113	-0.6787	AGBL5	ATP/GTP binding protein-like 5	60509	ENSG00000084693
ILMN_4780519	0.7147	AGK	acylglycerol kinase	55750	ENSG00000006530
ILMN_5860707	0.7444	AK5	adenylate kinase 5	26289	ENSG00000154027
ILMN_5570750	0.6653	AKAP6	A kinase (PRKA) anchor protein 6	9472	ENSG00000151320
ILMN_4200390	0.6865	ALDOA	aldolase A, fructose-bisphosphate	226	ENSG00000149925
ILMN_2970746	0.674	AP2S1	adaptor-related protein complex 2, sigma 1 subunit	1175	ENSG00000042753
ILMN_6860114	0.7227	AP3S1	adaptor-related protein complex 3, sigma 1 subunit	1176	ENSG00000177879
ILMN_130180	-0.6775	AP5Z1	adaptor-related protein complex 5, zeta 1 subunit	9907	ENSG00000242802
ILMN_1090142	-0.732	ARAF	v-raf murine sarcoma 3611 viral oncogene homolog	369	ENSG00000078061
ILMN_840600	0.7189	ARF1	ADP-ribosylation factor 1	375	ENSG00000143761
ILMN_4480601	0.6791	ARF3	ADP-ribosylation factor 3	377	ENSG00000134287
ILMN_3120092	0.7251	ARHGAP32	Rho GTPase activating protein 32	9743	ENSG00000134909
ILMN_6200736	0.682	ARHGEF9	Cdc42 guanine nucleotide exchange factor (GEF) 9	23229	ENSG00000131089
ILMN_2120025	0.747	ARL1	ADP-ribosylation factor-like 1	400	ENSG00000120805
ILMN_6380731	0.6873	ARL8B	ADP-ribosylation factor-like 8B	55207	ENSG00000134108
ILMN_460040	-0.7589	ATM	ataxia telangiectasia mutated	472	ENSG00000149311
ILMN_6130181	0.6782	ATP1A3	ATPase, Na+/K+ transporting, alpha 3 polypeptide	478	ENSG00000105409
ILMN_5900082	0.748	ATP2A2	ATPase, Ca++ transporting, cardiac muscle, slow twitch 2	488	ENSG00000174437
ILMN_2570341	0.6724	ATP2C1	ATPase, Ca++ transporting, type 2C, member 1	27032	ENSG00000017260
ILMN_3710458	0.7219	ATP5C1	ATP synthase, H+ transporting, mitochondrial F1 complex, gamma polypeptide 1	509	ENSG00000165629
ILMN_5720368	0.6835	ATP5F1	ATP synthase, H+ transporting, mitochondrial Fo complex, subunit B1	515	ENSG00000116459
ILMN_6350400	0.6787	ATP5G3	ATP synthase, H+ transporting, mitochondrial Fo complex, subunit C3 (subunit 9)	518	ENSG00000154518
ILMN_6020148	0.8006	ATP5H	ATP synthase, H+ transporting, mitochondrial Fo complex, subunit d	10476	ENSG00000167863
ILMN_7000692	0.6757	ATP6V1A	ATPase, H+ transporting, lysosomal 70kDa, V1 subunit A	523	ENSG00000114573
ILMN_5550592	0.6628	ATP6V1B2	ATPase, H+ transporting, lysosomal 56/58kDa, V1 subunit B2	526	ENSG00000147416
ILMN_770575	0.7431	ATP6V1C1	ATPase, H+ transporting, lysosomal 42kDa, V1 subunit C1	528	ENSG00000155097
ILMN_6860717	0.7754	ATP6V1D	ATPase, H+ transporting, lysosomal 34kDa, V1 subunit D	51382	ENSG00000100554
ILMN_3990112	0.7882	ATP6V1H	ATPase, H+ transporting, lysosomal 50/57kDa, V1 subunit H	51606	ENSG00000047249
ILMN_380195	0.6953	ATPIF1	ATPase inhibitory factor 1	93974	ENSG00000130770
ILMN_4010433	0.7402	ATXN10	ataxin 10	25814	ENSG00000130638
ILMN_2480068	0.7861	C14orf2	chromosome 14 open reading frame 2	9556	ENSG00000156411
ILMN_4010672	-0.6968	CACFD1	calcium channel flower domain containing 1	11094	ENSG00000160325
ILMN_4670128	0.7196	CACNG3	calcium channel, voltage-dependent, gamma subunit 3	10368	ENSG00000006116
ILMN_2470435	0.6929	CADPS	Ca++-dependent secretion activator	8618	ENSG00000163618
ILMN_6100019	0.6744	CALM3	calmodulin 3 (phosphorylase kinase, delta)	808	ENSG00000160014
ILMN_5290402	-0.7935	CBR4	carbonyl reductase 4	84869	ENSG00000145439
ILMN_1450673	0.7736	CCNA1	cyclin A1	8900	ENSG00000133101
ILMN_6370156	0.7737	CCND2	cyclin D2	894	ENSG00000118971
ILMN_6900619	0.7077	CCS	copper chaperone for superoxide dismutase	9973	ENSG00000173992
ILMN_2340671	0.6977	CDC42	cell division cycle 42 (GTP binding protein, 25kDa)	998	ENSG00000070831
ILMN_2690133	-0.7298	CEP164	centrosomal protein 164kDa	22897	ENSG00000110274
ILMN_1410575	0.7559	CEP41	centrosomal protein 41kDa	95681	ENSG00000106477
ILMN_1230072	-0.6782	CERS5	ceramide synthase 5	91012	ENSG00000139624
ILMN_4560239	0.6652	CHCHD6	coiled-coil-helix-coiled-coil-helix domain containing 6	84303	ENSG00000159685
ILMN_6130100	0.8286	CHMP4B	charged multivesicular body protein 4B	128866	ENSG00000101421
ILMN_510368	0.7375	CHN1	chimerin (chimaerin) 1	1123	ENSG00000128656
ILMN_4120592	0.6934	CHP1	calcineurin-like EF hand protein 1	11261	ENSG00000187446
ILMN_4810441	0.7013	CHST1	carbohydrate (keratan sulfate Gal-6) sulfotransferase 1	8534	ENSG00000175264
ILMN_60070	-0.758	CHST12	carbohydrate (chondroitin 4) sulfotransferase 12	55501	ENSG00000136213
ILMN_1190097	0.6793	CMC2	COX assembly mitochondrial protein 2 homolog (S. cerevisiae)	56942	ENSG00000103121
ILMN_6380253	-0.7349	CNOT2	CCR4-NOT transcription complex, subunit 2	4848	ENSG00000111596
ILMN_70497	0.7347	CNTNAP2	contactin associated protein-like 2	26047	ENSG00000174469
ILMN_5910301	0.6989	COG1	component of oligomeric golgi complex 1	9382	ENSG00000166685
ILMN_6350731	0.7201	COPG1	coatomer protein complex, subunit gamma 1	22820	ENSG00000181789
ILMN_6200408	0.706	COQ10B	coenzyme Q10 homolog B (S. cerevisiae)	80219	ENSG00000115520
ILMN_3170070	0.7387	COX5A	cytochrome c oxidase subunit Va	9377	ENSG00000178741
ILMN_5390010	0.8082	COX6C	cytochrome c oxidase subunit VIc	1345	ENSG00000164919
ILMN_7000497	0.7462	COX7B	cytochrome c oxidase subunit VIIb	1349	ENSG00000131174
ILMN_6290609	-0.7797	CROCC	ciliary rootlet coiled-coil, rootletin	9696	ENSG00000058453
ILMN_3120647	-0.6815	CRYZL1	crystallin, zeta (quinone reductase)-like 1	9946	ENSG00000205758
ILMN_5890193	0.7542	CUL3	cullin 3	8452	ENSG00000036257
ILMN_1780463	0.6786	CXADR	coxsackie virus and adenovirus receptor	1525	ENSG00000154639
ILMN_2650053	0.6836	CYP51A1	cytochrome P450, family 51, subfamily A, polypeptide 1	1595	ENSG00000001630
ILMN_2450037	0.6642	DDX1	DEAD (Asp-Glu-Ala-Asp) box helicase 1	1653	ENSG00000079785
ILMN_1170167	0.7131	DDX25	DEAD (Asp-Glu-Ala-Asp) box helicase 25	29118	ENSG00000109832
ILMN_6860082	0.6691	DPY30	dpy-30 homolog (C. elegans)	84661	ENSG00000162961
ILMN_5900731	0.7617	DYNLL1	dynein, light chain, LC8-type 1	8655	ENSG00000088986
ILMN_4780161	-0.7674	EDC3	enhancer of mRNA decapping 3 homolog (S. cerevisiae)	80153	ENSG00000179151
ILMN_50017	-0.6721	EEF1A1	eukaryotic translation elongation factor 1 alpha 1	1915	ENSG00000156508
ILMN_3940497	0.6928	EHD3	EH-domain containing 3	30845	ENSG00000013016
ILMN_70670	0.6893	EMC4	ER membrane protein complex subunit 4	51234	ENSG00000128463
ILMN_4280497	0.6658	ERLEC1	endoplasmic reticulum lectin 1	27248	ENSG00000068912
ILMN_2510025	0.6844	EXOC6	exocyst complex component 6	54536	ENSG00000138190
ILMN_3800168	-0.6763	EXOSC2	exosome component 2	23404	ENSG00000130713
ILMN_2360427	0.7058	FABP3	fatty acid binding protein 3, muscle and heart (mammary-derived growth inhibitor)	2170	ENSG00000121769
ILMN_5080079	-0.7114	FANCC	Fanconi anemia, complementation group C	2176	ENSG00000158169
ILMN_5270358	0.7542	FAR2	fatty acyl CoA reductase 2	55711	ENSG00000064763
ILMN_3710086	0.6702	FKBP1B	FK506 binding protein 1B, 12.6 kDa	2281	ENSG00000119782
ILMN_2690093	0.7029	GHITM	growth hormone inducible transmembrane protein	27069	ENSG00000165678
ILMN_6660593	0.6983	GNAS	GNAS complex locus	2778	ENSG00000087460
ILMN_6590725	0.7302	GOT1	glutamic-oxaloacetic transaminase 1, soluble (aspartate aminotransferase 1)	2805	ENSG00000120053
ILMN_6370504	0.6975	GRSF1	G-rich RNA sequence binding factor 1	2926	ENSG00000132463
ILMN_6130279	0.6743	GUCY1B3	guanylate cyclase 1, soluble, beta 3	2983	ENSG00000061918
ILMN_5900008	0.7398	HAGH	hydroxyacylglutathione hydrolase	3029	ENSG00000063854
ILMN_4560433	0.7114	HMP19	HMP19 protein	51617	ENSG00000170091
ILMN_1450528	0.7377	HPRT1	hypoxanthine phosphoribosyltransferase 1	3251	ENSG00000165704
ILMN_4780162	-0.6731	HYAL1	hyaluronoglucosaminidase 1	3373	ENSG00000114378
ILMN_6220619	-0.7453	IKBKB	inhibitor of kappa light polypeptide gene enhancer in B-cells, kinase beta	3551	ENSG00000104365
ILMN_2810280	0.7836	ISCU	iron-sulfur cluster scaffold homolog (E. coli)	23479	ENSG00000136003
ILMN_4730041	0.6807	KALRN	kalirin, RhoGEF kinase	8997	ENSG00000160145
ILMN_730497	0.6641	KCNJ4	potassium inwardly-rectifying channel, subfamily J, member 4	3761	ENSG00000168135
ILMN_6650162	-0.6628	KIAA1683	KIAA1683	80726	ENSG00000130518
ILMN_5390156	0.7239	KLHL12	kelch-like 12 (Drosophila)	59349	ENSG00000117153
ILMN_6510075	0.7132	KPNA2	karyopherin alpha 2 (RAG cohort 1, importin alpha 1)	3838	ENSG00000182481
ILMN_1240520	0.7185	LANCL2	LanC lantibiotic synthetase component C-like 2 (bacterial)	55915	ENSG00000132434
ILMN_2470121	-0.6732	LEPREL2	leprecan-like 2	10536	ENSG00000110811
ILMN_7040465	-0.672	LIPT1	lipoyltransferase 1	51601	ENSG00000144182
ILMN_1190619	0.6706	MAGEE1	melanoma antigen family E, 1	57692	ENSG00000198934
ILMN_5360711	0.6645	MALSU1	mitochondrial assembly of ribosomal large subunit 1	115416	ENSG00000156928
ILMN_1740347	0.7202	MAP2K1	mitogen-activated protein kinase kinase 1	5604	ENSG00000169032
ILMN_3060600	0.7168	MAP2K4	mitogen-activated protein kinase kinase 4	6416	ENSG00000065559
ILMN_4150167	-0.7527	MAP3K3	mitogen-activated protein kinase kinase kinase 3	4215	ENSG00000198909
ILMN_580471	0.7342	MAPK1	mitogen-activated protein kinase 1	5594	ENSG00000100030
ILMN_940497	0.7503	MAPK10	mitogen-activated protein kinase 10	5602	ENSG00000109339
ILMN_5720139	0.6732	MCF2	MCF.2 cell line derived transforming sequence	4168	ENSG00000101977
ILMN_430131	0.754	MDH1	malate dehydrogenase 1, NAD (soluble)	4190	ENSG00000014641
ILMN_1980465	0.6758	MEAF6	MYST/Esa1-associated factor 6	64769	ENSG00000163875
ILMN_610279	1	MGST3	microsomal glutathione S-transferase 3	4259	ENSG00000143198
ILMN_380239	-0.6709	MKS1	Meckel syndrome, type 1	54903	ENSG00000011143
ILMN_2760288	0.6876	MOB4	MOB family member 4, phocein	25843	ENSG00000115540
ILMN_110026	0.6666	MOCS2	molybdenum cofactor synthesis 2	4338	ENSG00000164172
ILMN_840021	0.6705	MPC2	mitochondrial pyruvate carrier 2	25874	ENSG00000143158
ILMN_7000315	0.7764	MRPL15	mitochondrial ribosomal protein L15	29088	ENSG00000137547
ILMN_3610338	0.68	MRPS23	mitochondrial ribosomal protein S23	51649	ENSG00000181610
ILMN_6040193	0.7142	MRPS30	mitochondrial ribosomal protein S30	10884	ENSG00000112996
ILMN_6100044	0.7827	MTCH1	mitochondrial carrier 1	23787	ENSG00000137409
ILMN_6860537	0.7262	MTX2	metaxin 2	10651	ENSG00000128654
ILMN_7000102	-0.7555	MUTYH	mutY homolog (E. coli)	4595	ENSG00000132781
ILMN_580044	-0.7525	MZT2B	mitotic spindle organizing protein 2B	80097	ENSG00000152082
ILMN_3840563	0.7391	NCALD	neurocalcin delta	83988	ENSG00000104490
ILMN_5290181	0.6922	NCEH1	neutral cholesterol ester hydrolase 1	57552	ENSG00000144959
ILMN_3120537	0.7251	NDN	necdin homolog (mouse)	4692	ENSG00000182636
ILMN_5890647	0.7027	NDUFA8	NADH dehydrogenase (ubiquinone) 1 alpha subcomplex, 8, 19kDa	4702	ENSG00000119421
ILMN_5220377	0.7577	NDUFB1	NADH dehydrogenase (ubiquinone) 1 beta subcomplex, 1, 7kDa	4707	ENSG00000183648
ILMN_5890048	0.6779	NDUFB5	NADH dehydrogenase (ubiquinone) 1 beta subcomplex, 5, 16kDa	4711	ENSG00000136521
ILMN_70136	0.6918	NELL1	NEL-like 1 (chicken)	4745	ENSG00000165973
ILMN_7000735	0.7484	NGEF	neuronal guanine nucleotide exchange factor	25791	ENSG00000066248
ILMN_3780358	0.7168	NGFRAP1	nerve growth factor receptor (TNFRSF16) associated protein 1	27018	ENSG00000166681
ILMN_4060253	-0.7062	NINL	ninein-like	22981	ENSG00000101004
ILMN_1780333	0.7631	NME1	NME/NM23 nucleoside diphosphate kinase 1	4830	ENSG00000239672
ILMN_5220136	0.6749	NRSN1	neurensin 1	140767	ENSG00000152954
ILMN_6180181	0.7125	NSF	N-ethylmaleimide-sensitive factor	4905	ENSG00000073969
ILMN_7050176	0.6767	NT5DC3	5'-nucleotidase domain containing 3	51559	ENSG00000111696
ILMN_5050091	0.7728	OAT	ornithine aminotransferase	4942	ENSG00000065154
ILMN_1090242	0.6826	OLFM1	olfactomedin 1	10439	ENSG00000130558
ILMN_5080142	0.7472	OPA1	optic atrophy 1 (autosomal dominant)	4976	ENSG00000198836
ILMN_3780082	0.6897	PACSIN1	protein kinase C and casein kinase substrate in neurons 1	29993	ENSG00000124507
ILMN_4810181	0.6712	PAK1	p21 protein (Cdc42/Rac)-activated kinase 1	5058	ENSG00000149269
ILMN_60056	0.704	PAM	peptidylglycine alpha-amidating monooxygenase	5066	ENSG00000145730
ILMN_3990347	0.6698	PCMT1	protein-L-isoaspartate (D-aspartate) O-methyltransferase	5110	ENSG00000120265
ILMN_2340537	0.7399	PCSK2	proprotein convertase subtilisin/kexin type 2	5126	ENSG00000125851
ILMN_6200072	0.731	PDHB	pyruvate dehydrogenase (lipoamide) beta	5162	ENSG00000168291
ILMN_4540671	0.6781	PET112	PET112 homolog (yeast)	5188	ENSG00000059691
ILMN_5340039	0.7061	PEX11B	peroxisomal biogenesis factor 11 beta	8799	ENSG00000131779
ILMN_5860139	0.6675	PEX19	peroxisomal biogenesis factor 19	5824	ENSG00000162735
ILMN_2640446	0.6674	PFDN1	prefoldin subunit 1	5201	ENSG00000113068
ILMN_6620372	-0.6839	PFKFB4	6-phosphofructo-2-kinase/fructose-2,6-biphosphatase 4	5210	ENSG00000114268
ILMN_2100092	0.7707	PGM2L1	phosphoglucomutase 2-like 1	283209	ENSG00000165434
ILMN_780601	-0.7529	PHKA2	phosphorylase kinase, alpha 2 (liver)	5256	ENSG00000044446
ILMN_1190181	0.7232	PHYHIPL	phytanoyl-CoA 2-hydroxylase interacting protein-like	84457	ENSG00000165443
ILMN_6020050	0.6614	PIGY	phosphatidylinositol glycan anchor biosynthesis, class Y	84992	ENSG00000145337
ILMN_780041	0.7852	PLK2	polo-like kinase 2	10769	ENSG00000145632
ILMN_5360040	-0.6833	POMT2	protein-O-mannosyltransferase 2	29954	ENSG00000009830
ILMN_70066	0.6677	PPP2R2B	protein phosphatase 2, regulatory subunit B, beta	5521	ENSG00000156475
ILMN_3130520	-0.6893	PRDM2	PR domain containing 2, with ZNF domain	7799	ENSG00000116731
ILMN_4210575	0.6823	PRKAR2B	protein kinase, cAMP-dependent, regulatory, type II, beta	5577	ENSG00000005249
ILMN_6770324	0.745	PRMT3	protein arginine methyltransferase 3	10196	ENSG00000185238
ILMN_2320484	0.6714	PSMA5	proteasome (prosome, macropain) subunit, alpha type, 5	5686	ENSG00000143106
ILMN_450139	0.6962	PSMG1	proteasome (prosome, macropain) assembly chaperone 1	8624	ENSG00000183527
ILMN_380292	-0.6993	PTDSS2	phosphatidylserine synthase 2	81490	ENSG00000174915
ILMN_4200446	0.8497	PTPRN2	protein tyrosine phosphatase, receptor type, N polypeptide 2	5799	ENSG00000155093
ILMN_6980280	0.722	PTRH2	peptidyl-tRNA hydrolase 2	51651	ENSG00000141378
ILMN_3870402	-0.6748	QTRTD1	queuine tRNA-ribosyltransferase domain containing 1	79691	ENSG00000151576
ILMN_5670092	0.673	RAB1A	RAB1A, member RAS oncogene family	5861	ENSG00000138069
ILMN_3170348	0.7814	RAB22A	RAB22A, member RAS oncogene family	57403	ENSG00000124209
ILMN_1850280	0.6987	RAB5A	RAB5A, member RAS oncogene family	5868	ENSG00000144566
ILMN_7050161	0.6692	RAN	RAN, member RAS oncogene family	5901	ENSG00000132341
ILMN_4150300	-0.6618	RBM38	RNA binding motif protein 38	55544	ENSG00000132819
ILMN_2680487	0.7294	RC3H1	ring finger and CCCH-type domains 1	149041	ENSG00000135870
ILMN_2850541	-0.676	RDH5	retinol dehydrogenase 5 (11-cis/9-cis)	5959	ENSG00000135437
ILMN_2120292	0.7522	REEP1	receptor accessory protein 1	65055	ENSG00000068615
ILMN_6900066	0.8312	RGS4	regulator of G-protein signaling 4	5999	ENSG00000117152
ILMN_2680315	0.6831	RPL26L1	ribosomal protein L26-like 1	51121	ENSG00000037241
ILMN_6770563	-0.662	RPS6KA1	ribosomal protein S6 kinase, 90kDa, polypeptide 1	6195	ENSG00000117676
ILMN_840731	-0.6716	RSU1	Ras suppressor protein 1	6251	ENSG00000148484
ILMN_6200301	0.7764	RTN3	reticulon 3	10313	ENSG00000133318
ILMN_2690450	0.6798	RTN4IP1	reticulon 4 interacting protein 1	84816	ENSG00000130347
ILMN_6350746	0.6615	SC5DL	sterol-C5-desaturase (ERG3 delta-5-desaturase homolog, S. cerevisiae)-like	6309	ENSG00000109929
ILMN_4560280	0.751	SCG2	secretogranin II	7857	ENSG00000171951
ILMN_510750	0.7234	SCG5	secretogranin V (7B2 protein)	6447	ENSG00000166922
ILMN_2690324	0.6742	SHOC2	soc-2 suppressor of clear homolog (C. elegans)	8036	ENSG00000108061
ILMN_2450093	0.7061	SLBP	stem-loop binding protein	7884	ENSG00000163950
ILMN_6400577	0.679	SLC17A7	solute carrier family 17 (sodium-dependent inorganic phosphate cotransporter), member 7	57030	ENSG00000104888
ILMN_1780750	-0.7279	SLC27A1	solute carrier family 27 (fatty acid transporter), member 1	376497	ENSG00000130304
ILMN_6550047	0.7099	SLC30A3	solute carrier family 30 (zinc transporter), member 3	7781	ENSG00000115194
ILMN_1050056	0.7838	SLC9A6	solute carrier family 9, subfamily A (NHE6, cation proton antiporter 6), member 6	10479	ENSG00000198689
ILMN_110520	0.6918	SLIRP	SRA stem-loop interacting RNA binding protein	81892	ENSG00000119705
ILMN_5700685	-0.7176	SMAD5	SMAD family member 5	4090	ENSG00000113658
ILMN_6040113	0.7867	SMYD2	SET and MYND domain containing 2	56950	ENSG00000143499
ILMN_4070292	0.713	SNCA	synuclein, alpha (non A4 component of amyloid precursor)	6622	ENSG00000145335
ILMN_6400025	0.6991	SNX10	sorting nexin 10	29887	ENSG00000086300
ILMN_130315	0.6833	SOD1	superoxide dismutase 1, soluble	6647	ENSG00000142168
ILMN_3850324	-0.7118	SORBS3	sorbin and SH3 domain containing 3	10174	ENSG00000120896
ILMN_7100338	0.6961	SRD5A1	steroid-5-alpha-reductase, alpha polypeptide 1 (3-oxo-5 alpha-steroid delta 4-dehydrogenase alpha 1)	6715	ENSG00000145545
ILMN_5340736	-0.6723	SRGAP1	SLIT-ROBO Rho GTPase activating protein 1	57522	ENSG00000196935
ILMN_4120717	0.7359	STAR	steroidogenic acute regulatory protein	6770	ENSG00000147465
ILMN_4670019	0.6707	STAU2	staufen, RNA binding protein, homolog 2 (Drosophila)	27067	ENSG00000040341
ILMN_5550372	0.7186	STK24	serine/threonine kinase 24	8428	ENSG00000102572
ILMN_3450056	0.677	STMN1	stathmin 1	3925	ENSG00000117632
ILMN_6450341	0.6633	STXBP1	syntaxin binding protein 1	6812	ENSG00000136854
ILMN_3290292	0.7098	SYNGR3	synaptogyrin 3	9143	ENSG00000127561
ILMN_4480735	-0.6997	SYNJ2BP	synaptojanin 2 binding protein	55333	ENSG00000213463
ILMN_6520609	0.6759	SYP	synaptophysin	6855	ENSG00000102003
ILMN_2340301	0.6841	TAX1BP1	Tax1 (human T-cell leukemia virus type I) binding protein 1	8887	ENSG00000106052
ILMN_5890167	-0.7121	TAZ	tafazzin	6901	ENSG00000102125
ILMN_2900400	-0.6698	TCAP	titin-cap	8557	ENSG00000173991
ILMN_3450685	0.7051	TMEM130	transmembrane protein 130	222865	ENSG00000166448
ILMN_6100156	0.7037	TOMM20	translocase of outer mitochondrial membrane 20 homolog (yeast)	9804	ENSG00000173726
ILMN_1190129	0.671	TTC1	tetratricopeptide repeat domain 1	7265	ENSG00000113312
ILMN_4670131	0.7123	TUBB4A	tubulin, beta 4A class IVa	10382	ENSG00000104833
ILMN_5360722	0.7527	TUSC2	tumor suppressor candidate 2	11334	ENSG00000114383
ILMN_1980193	0.706	TXN	thioredoxin	7295	ENSG00000136810
ILMN_1690592	0.7559	UBE2N	ubiquitin-conjugating enzyme E2N	7334	ENSG00000177889
ILMN_6980112	0.7717	UCHL1	ubiquitin carboxyl-terminal esterase L1 (ubiquitin thiolesterase)	7345	ENSG00000154277
ILMN_6860014	0.6807	UGP2	UDP-glucose pyrophosphorylase 2	7360	ENSG00000169764
ILMN_5270164	0.6912	UQCR11	ubiquinol-cytochrome c reductase, complex III subunit XI	10975	ENSG00000127540
ILMN_5050064	0.7434	UQCRQ	ubiquinol-cytochrome c reductase, complex III subunit VII, 9.5kDa	27089	ENSG00000164405
ILMN_1850309	-0.6611	VARS2	valyl-tRNA synthetase 2, mitochondrial (putative)	57176	ENSG00000137411
ILMN_5690121	0.7321	VDAC1	voltage-dependent anion channel 1	7416	ENSG00000213585
ILMN_3170332	0.6854	VPS35	vacuolar protein sorting 35 homolog (S. cerevisiae)	55737	ENSG00000069329
ILMN_4850184	0.7446	WASF1	WAS protein family, member 1	8936	ENSG00000112290
ILMN_6040026	0.7254	WASL	Wiskott-Aldrich syndrome-like	8976	ENSG00000106299
ILMN_3800270	-0.6705	XPNPEP3	X-prolyl aminopeptidase (aminopeptidase P) 3, putative	63929	ENSG00000196236
cellular component::intracellular::GO:0005622
C=11369;O=358;E=318.17;R=1.13;rawP=8.11e-07;adjP=4.62e-05
Probe Set	r (cortex)	Symbol	Name	Entrez ID	Ensemble Gene ID
ILMN_4540020	-0.6911	ABHD14B	abhydrolase domain containing 14B	84836	ENSG00000114779
ILMN_5700037	0.6631	ACLY	ATP citrate lyase	47	ENSG00000131473
ILMN_5890139	0.6653	ACOT7	acyl-CoA thioesterase 7	11332	ENSG00000097021
ILMN_2230048	0.7437	ACP1	acid phosphatase 1, soluble	52	ENSG00000143727
ILMN_450594	-0.6875	ACSF2	acyl-CoA synthetase family member 2	80221	ENSG00000167107
ILMN_4610551	-0.7253	ACVR2B	activin A receptor, type IIB	93	ENSG00000114739
ILMN_7050113	-0.6787	AGBL5	ATP/GTP binding protein-like 5	60509	ENSG00000084693
ILMN_1780446	-0.7618	AGER	advanced glycosylation end product-specific receptor	177	ENSG00000204305
ILMN_4780519	0.7147	AGK	acylglycerol kinase	55750	ENSG00000006530
ILMN_5860707	0.7444	AK5	adenylate kinase 5	26289	ENSG00000154027
ILMN_5570750	0.6653	AKAP6	A kinase (PRKA) anchor protein 6	9472	ENSG00000151320
ILMN_4280088	0.6831	AKIRIN2	akirin 2	55122	ENSG00000135334
ILMN_4200390	0.6865	ALDOA	aldolase A, fructose-bisphosphate	226	ENSG00000149925
ILMN_1050739	-0.6731	ANKZF1	ankyrin repeat and zinc finger domain containing 1	55139	ENSG00000163516
ILMN_2970746	0.674	AP2S1	adaptor-related protein complex 2, sigma 1 subunit	1175	ENSG00000042753
ILMN_6860114	0.7227	AP3S1	adaptor-related protein complex 3, sigma 1 subunit	1176	ENSG00000177879
ILMN_130180	-0.6775	AP5Z1	adaptor-related protein complex 5, zeta 1 subunit	9907	ENSG00000242802
ILMN_580100	-0.6794	APOBEC3A	apolipoprotein B mRNA editing enzyme, catalytic polypeptide-like 3A	200315	ENSG00000128383
ILMN_1090142	-0.732	ARAF	v-raf murine sarcoma 3611 viral oncogene homolog	369	ENSG00000078061
ILMN_840600	0.7189	ARF1	ADP-ribosylation factor 1	375	ENSG00000143761
ILMN_4480601	0.6791	ARF3	ADP-ribosylation factor 3	377	ENSG00000134287
ILMN_3120092	0.7251	ARHGAP32	Rho GTPase activating protein 32	9743	ENSG00000134909
ILMN_6200736	0.682	ARHGEF9	Cdc42 guanine nucleotide exchange factor (GEF) 9	23229	ENSG00000131089
ILMN_2120025	0.747	ARL1	ADP-ribosylation factor-like 1	400	ENSG00000120805
ILMN_6380731	0.6873	ARL8B	ADP-ribosylation factor-like 8B	55207	ENSG00000134108
ILMN_6380047	0.7255	ARPC1A	actin related protein 2/3 complex, subunit 1A, 41kDa	10552	ENSG00000241685
ILMN_460040	-0.7589	ATM	ataxia telangiectasia mutated	472	ENSG00000149311
ILMN_6130181	0.6782	ATP1A3	ATPase, Na+/K+ transporting, alpha 3 polypeptide	478	ENSG00000105409
ILMN_5900082	0.748	ATP2A2	ATPase, Ca++ transporting, cardiac muscle, slow twitch 2	488	ENSG00000174437
ILMN_2570341	0.6724	ATP2C1	ATPase, Ca++ transporting, type 2C, member 1	27032	ENSG00000017260
ILMN_3710458	0.7219	ATP5C1	ATP synthase, H+ transporting, mitochondrial F1 complex, gamma polypeptide 1	509	ENSG00000165629
ILMN_5720368	0.6835	ATP5F1	ATP synthase, H+ transporting, mitochondrial Fo complex, subunit B1	515	ENSG00000116459
ILMN_6350400	0.6787	ATP5G3	ATP synthase, H+ transporting, mitochondrial Fo complex, subunit C3 (subunit 9)	518	ENSG00000154518
ILMN_6020148	0.8006	ATP5H	ATP synthase, H+ transporting, mitochondrial Fo complex, subunit d	10476	ENSG00000167863
ILMN_7000692	0.6757	ATP6V1A	ATPase, H+ transporting, lysosomal 70kDa, V1 subunit A	523	ENSG00000114573
ILMN_5550592	0.6628	ATP6V1B2	ATPase, H+ transporting, lysosomal 56/58kDa, V1 subunit B2	526	ENSG00000147416
ILMN_770575	0.7431	ATP6V1C1	ATPase, H+ transporting, lysosomal 42kDa, V1 subunit C1	528	ENSG00000155097
ILMN_6860717	0.7754	ATP6V1D	ATPase, H+ transporting, lysosomal 34kDa, V1 subunit D	51382	ENSG00000100554
ILMN_3990112	0.7882	ATP6V1H	ATPase, H+ transporting, lysosomal 50/57kDa, V1 subunit H	51606	ENSG00000047249
ILMN_380195	0.6953	ATPIF1	ATPase inhibitory factor 1	93974	ENSG00000130770
ILMN_4010433	0.7402	ATXN10	ataxin 10	25814	ENSG00000130638
ILMN_1770059	0.717	BASP1	brain abundant, membrane attached signal protein 1	10409	ENSG00000176788
ILMN_1770021	-0.703	BAZ2B	bromodomain adjacent to zinc finger domain, 2B	29994	ENSG00000123636
ILMN_6220687	0.6786	BCCIP	BRCA2 and CDKN1A interacting protein	56647	ENSG00000107949
ILMN_6650438	0.6998	BEX1	brain expressed, X-linked 1	55859	ENSG00000133169
ILMN_2650040	-0.7202	BRAT1	BRCA1-associated ATM activator 1	221927	ENSG00000106009
ILMN_7000433	0.669	BTBD10	BTB (POZ) domain containing 10	84280	ENSG00000148925
ILMN_2480068	0.7861	C14orf2	chromosome 14 open reading frame 2	9556	ENSG00000156411
ILMN_2940129	0.7161	C17orf79	chromosome 17 open reading frame 79	55352	ENSG00000172301
ILMN_4010672	-0.6968	CACFD1	calcium channel flower domain containing 1	11094	ENSG00000160325
ILMN_4670128	0.7196	CACNG3	calcium channel, voltage-dependent, gamma subunit 3	10368	ENSG00000006116
ILMN_1780301	-0.7061	CACUL1	CDK2-associated, cullin domain 1	143384	ENSG00000151893
ILMN_2470435	0.6929	CADPS	Ca++-dependent secretion activator	8618	ENSG00000163618
ILMN_6100019	0.6744	CALM3	calmodulin 3 (phosphorylase kinase, delta)	808	ENSG00000160014
ILMN_3990687	0.7031	CBLC	Cbl proto-oncogene, E3 ubiquitin protein ligase C	23624	ENSG00000142273
ILMN_5290402	-0.7935	CBR4	carbonyl reductase 4	84869	ENSG00000145439
ILMN_6650170	-0.7158	CCDC88B	coiled-coil domain containing 88B	283234	ENSG00000168071
ILMN_1450673	0.7736	CCNA1	cyclin A1	8900	ENSG00000133101
ILMN_6370156	0.7737	CCND2	cyclin D2	894	ENSG00000118971
ILMN_6900619	0.7077	CCS	copper chaperone for superoxide dismutase	9973	ENSG00000173992
ILMN_2340671	0.6977	CDC42	cell division cycle 42 (GTP binding protein, 25kDa)	998	ENSG00000070831
ILMN_2690133	-0.7298	CEP164	centrosomal protein 164kDa	22897	ENSG00000110274
ILMN_1410575	0.7559	CEP41	centrosomal protein 41kDa	95681	ENSG00000106477
ILMN_1230072	-0.6782	CERS5	ceramide synthase 5	91012	ENSG00000139624
ILMN_3130132	-0.663	CGN	cingulin	57530	ENSG00000143375
ILMN_4560239	0.6652	CHCHD6	coiled-coil-helix-coiled-coil-helix domain containing 6	84303	ENSG00000159685
ILMN_6130100	0.8286	CHMP4B	charged multivesicular body protein 4B	128866	ENSG00000101421
ILMN_510368	0.7375	CHN1	chimerin (chimaerin) 1	1123	ENSG00000128656
ILMN_4120592	0.6934	CHP1	calcineurin-like EF hand protein 1	11261	ENSG00000187446
ILMN_4050088	0.6729	CHRM1	cholinergic receptor, muscarinic 1	1128	ENSG00000168539
ILMN_4810441	0.7013	CHST1	carbohydrate (keratan sulfate Gal-6) sulfotransferase 1	8534	ENSG00000175264
ILMN_60070	-0.758	CHST12	carbohydrate (chondroitin 4) sulfotransferase 12	55501	ENSG00000136213
ILMN_3710110	0.7614	CMAS	cytidine monophosphate N-acetylneuraminic acid synthetase	55907	ENSG00000111726
ILMN_1190097	0.6793	CMC2	COX assembly mitochondrial protein 2 homolog (S. cerevisiae)	56942	ENSG00000103121
ILMN_6380253	-0.7349	CNOT2	CCR4-NOT transcription complex, subunit 2	4848	ENSG00000111596
ILMN_70497	0.7347	CNTNAP2	contactin associated protein-like 2	26047	ENSG00000174469
ILMN_5910301	0.6989	COG1	component of oligomeric golgi complex 1	9382	ENSG00000166685
ILMN_1340750	-0.7366	COMMD5	COMM domain containing 5	28991	ENSG00000170619
ILMN_6350731	0.7201	COPG1	coatomer protein complex, subunit gamma 1	22820	ENSG00000181789
ILMN_2510603	0.7038	COPS8	COP9 constitutive photomorphogenic homolog subunit 8 (Arabidopsis)	10920	ENSG00000198612
ILMN_6200408	0.706	COQ10B	coenzyme Q10 homolog B (S. cerevisiae)	80219	ENSG00000115520
ILMN_3170070	0.7387	COX5A	cytochrome c oxidase subunit Va	9377	ENSG00000178741
ILMN_5390010	0.8082	COX6C	cytochrome c oxidase subunit VIc	1345	ENSG00000164919
ILMN_7000497	0.7462	COX7B	cytochrome c oxidase subunit VIIb	1349	ENSG00000131174
ILMN_6290609	-0.7797	CROCC	ciliary rootlet coiled-coil, rootletin	9696	ENSG00000058453
ILMN_3120647	-0.6815	CRYZL1	crystallin, zeta (quinone reductase)-like 1	9946	ENSG00000205758
ILMN_2940746	-0.6752	CTDSP2	CTD (carboxy-terminal domain, RNA polymerase II, polypeptide A) small phosphatase 2	10106	ENSG00000175215
ILMN_5890193	0.7542	CUL3	cullin 3	8452	ENSG00000036257
ILMN_1780463	0.6786	CXADR	coxsackie virus and adenovirus receptor	1525	ENSG00000154639
ILMN_2470433	-0.674	CXXC1	CXXC finger protein 1	30827	ENSG00000154832
ILMN_2650053	0.6836	CYP51A1	cytochrome P450, family 51, subfamily A, polypeptide 1	1595	ENSG00000001630
ILMN_430369	0.758	DCAF6	DDB1 and CUL4 associated factor 6	55827	ENSG00000143164
ILMN_5340053	0.7759	DCLK1	doublecortin-like kinase 1	9201	ENSG00000133083
ILMN_1090056	-0.7016	DCLRE1C	DNA cross-link repair 1C	64421	ENSG00000152457
ILMN_2450037	0.6642	DDX1	DEAD (Asp-Glu-Ala-Asp) box helicase 1	1653	ENSG00000079785
ILMN_1170167	0.7131	DDX25	DEAD (Asp-Glu-Ala-Asp) box helicase 25	29118	ENSG00000109832
ILMN_6040309	-0.6798	DGCR8	DiGeorge syndrome critical region gene 8	54487	ENSG00000128191
ILMN_2370711	0.6992	DGKB	diacylglycerol kinase, beta 90kDa	1607	ENSG00000136267
ILMN_6860082	0.6691	DPY30	dpy-30 homolog (C. elegans)	84661	ENSG00000162961
ILMN_3190168	-0.6829	DTX2	deltex homolog 2 (Drosophila)	113878	ENSG00000091073
ILMN_5900731	0.7617	DYNLL1	dynein, light chain, LC8-type 1	8655	ENSG00000088986
ILMN_1770601	0.7057	EBNA1BP2	EBNA1 binding protein 2	10969	ENSG00000117395
ILMN_4780161	-0.7674	EDC3	enhancer of mRNA decapping 3 homolog (S. cerevisiae)	80153	ENSG00000179151
ILMN_50017	-0.6721	EEF1A1	eukaryotic translation elongation factor 1 alpha 1	1915	ENSG00000156508
ILMN_3940497	0.6928	EHD3	EH-domain containing 3	30845	ENSG00000013016
ILMN_1780397	0.733	EIF1	eukaryotic translation initiation factor 1	10209	ENSG00000173812
ILMN_4480041	0.6673	ELMOD1	ELMO/CED-12 domain containing 1	55531	ENSG00000110675
ILMN_70670	0.6893	EMC4	ER membrane protein complex subunit 4	51234	ENSG00000128463
ILMN_5080368	0.771	ENC1	ectodermal-neural cortex 1 (with BTB-like domain)	8507	ENSG00000171617
ILMN_1580164	0.6688	ENY2	enhancer of yellow 2 homolog (Drosophila)	56943	ENSG00000120533
ILMN_4280497	0.6658	ERLEC1	endoplasmic reticulum lectin 1	27248	ENSG00000068912
ILMN_2510025	0.6844	EXOC6	exocyst complex component 6	54536	ENSG00000138190
ILMN_3800168	-0.6763	EXOSC2	exosome component 2	23404	ENSG00000130713
ILMN_2360427	0.7058	FABP3	fatty acid binding protein 3, muscle and heart (mammary-derived growth inhibitor)	2170	ENSG00000121769
ILMN_1980438	0.7088	FAM49A	family with sequence similarity 49, member A	81553	ENSG00000197872
ILMN_5080079	-0.7114	FANCC	Fanconi anemia, complementation group C	2176	ENSG00000158169
ILMN_5420315	-0.6668	FANCE	Fanconi anemia, complementation group E	2178	ENSG00000112039
ILMN_5270358	0.7542	FAR2	fatty acyl CoA reductase 2	55711	ENSG00000064763
ILMN_4010292	0.738	FBXL2	F-box and leucine-rich repeat protein 2	25827	ENSG00000153558
ILMN_2100132	-0.6679	FBXO38	F-box protein 38	81545	ENSG00000145868
ILMN_5420129	0.7059	FGF12	fibroblast growth factor 12	2257	ENSG00000114279
ILMN_3710086	0.6702	FKBP1B	FK506 binding protein 1B, 12.6 kDa	2281	ENSG00000119782
ILMN_6650541	0.7255	FOXG1	forkhead box G1	2290	ENSG00000176165
ILMN_1230497	0.7059	FRMPD2	FERM and PDZ domain containing 2	143162	ENSG00000170324
ILMN_2690093	0.7029	GHITM	growth hormone inducible transmembrane protein	27069	ENSG00000165678
ILMN_6660593	0.6983	GNAS	GNAS complex locus	2778	ENSG00000087460
ILMN_6590725	0.7302	GOT1	glutamic-oxaloacetic transaminase 1, soluble (aspartate aminotransferase 1)	2805	ENSG00000120053
ILMN_3520039	-0.6691	GRIN2C	glutamate receptor, ionotropic, N-methyl D-aspartate 2C	2905	ENSG00000161509
ILMN_6370504	0.6975	GRSF1	G-rich RNA sequence binding factor 1	2926	ENSG00000132463
ILMN_6130279	0.6743	GUCY1B3	guanylate cyclase 1, soluble, beta 3	2983	ENSG00000061918
ILMN_5900008	0.7398	HAGH	hydroxyacylglutathione hydrolase	3029	ENSG00000063854
ILMN_630047	-0.7474	HEXDC	hexosaminidase (glycosyl hydrolase family 20, catalytic domain) containing	284004	ENSG00000169660
ILMN_2320593	0.7874	HINT1	histidine triad nucleotide binding protein 1	3094	ENSG00000169567
ILMN_4560433	0.7114	HMP19	HMP19 protein	51617	ENSG00000170091
ILMN_1450528	0.7377	HPRT1	hypoxanthine phosphoribosyltransferase 1	3251	ENSG00000165704
ILMN_70452	0.6955	HSPB3	heat shock 27kDa protein 3	8988	ENSG00000169271
ILMN_3190270	0.681	HSPH1	heat shock 105kDa/110kDa protein 1	10808	ENSG00000120694
ILMN_4780162	-0.6731	HYAL1	hyaluronoglucosaminidase 1	3373	ENSG00000114378
ILMN_6220619	-0.7453	IKBKB	inhibitor of kappa light polypeptide gene enhancer in B-cells, kinase beta	3551	ENSG00000104365
ILMN_6660008	-0.7377	IKZF4	IKAROS family zinc finger 4 (Eos)	64375	ENSG00000123411
ILMN_730398	0.6789	IMP3	IMP3, U3 small nucleolar ribonucleoprotein, homolog (yeast)	55272	NULL
ILMN_2810280	0.7836	ISCU	iron-sulfur cluster scaffold homolog (E. coli)	23479	ENSG00000136003
ILMN_5720100	0.7681	JAKMIP1	janus kinase and microtubule interacting protein 1	152789	ENSG00000152969
ILMN_4730041	0.6807	KALRN	kalirin, RhoGEF kinase	8997	ENSG00000160145
ILMN_4230541	-0.7375	KAT6A	K(lysine) acetyltransferase 6A	7994	ENSG00000083168
ILMN_730497	0.6641	KCNJ4	potassium inwardly-rectifying channel, subfamily J, member 4	3761	ENSG00000168135
ILMN_6650162	-0.6628	KIAA1683	KIAA1683	80726	ENSG00000130518
ILMN_5390156	0.7239	KLHL12	kelch-like 12 (Drosophila)	59349	ENSG00000117153
ILMN_6510075	0.7132	KPNA2	karyopherin alpha 2 (RAG cohort 1, importin alpha 1)	3838	ENSG00000182481
ILMN_1240520	0.7185	LANCL2	LanC lantibiotic synthetase component C-like 2 (bacterial)	55915	ENSG00000132434
ILMN_5550735	-0.728	LAT	linker for activation of T cells	27040	ENSG00000213658
ILMN_6760133	0.7843	LDB2	LIM domain binding 2	9079	ENSG00000169744
ILMN_5890152	0.7392	LDOC1	leucine zipper, down-regulated in cancer 1	23641	ENSG00000182195
ILMN_2470121	-0.6732	LEPREL2	leprecan-like 2	10536	ENSG00000110811
ILMN_6040451	-0.6702	LIMA1	LIM domain and actin binding 1	51474	ENSG00000050405
ILMN_7040465	-0.672	LIPT1	lipoyltransferase 1	51601	ENSG00000144182
ILMN_940114	0.7797	LMO4	LIM domain only 4	8543	ENSG00000143013
ILMN_6400152	0.7331	LNX1	ligand of numb-protein X 1, E3 ubiquitin protein ligase	84708	ENSG00000072201
ILMN_1770519	-0.7455	LRCH4	leucine-rich repeats and calponin homology (CH) domain containing 4	4034	ENSG00000077454
ILMN_2630129	0.6718	MAGED1	melanoma antigen family D, 1	9500	ENSG00000179222
ILMN_1190619	0.6706	MAGEE1	melanoma antigen family E, 1	57692	ENSG00000198934
ILMN_5360711	0.6645	MALSU1	mitochondrial assembly of ribosomal large subunit 1	115416	ENSG00000156928
ILMN_1740347	0.7202	MAP2K1	mitogen-activated protein kinase kinase 1	5604	ENSG00000169032
ILMN_3060600	0.7168	MAP2K4	mitogen-activated protein kinase kinase 4	6416	ENSG00000065559
ILMN_4150167	-0.7527	MAP3K3	mitogen-activated protein kinase kinase kinase 3	4215	ENSG00000198909
ILMN_580471	0.7342	MAPK1	mitogen-activated protein kinase 1	5594	ENSG00000100030
ILMN_940497	0.7503	MAPK10	mitogen-activated protein kinase 10	5602	ENSG00000109339
ILMN_5720139	0.6732	MCF2	MCF.2 cell line derived transforming sequence	4168	ENSG00000101977
ILMN_2850398	0.7321	MCTS1	malignant T cell amplified sequence 1	28985	ENSG00000232119
ILMN_430131	0.754	MDH1	malate dehydrogenase 1, NAD (soluble)	4190	ENSG00000014641
ILMN_1980465	0.6758	MEAF6	MYST/Esa1-associated factor 6	64769	ENSG00000163875
ILMN_3450176	0.6743	MEF2C	myocyte enhancer factor 2C	4208	ENSG00000081189
ILMN_610279	1	MGST3	microsomal glutathione S-transferase 3	4259	ENSG00000143198
ILMN_2470176	0.8065	MIF	macrophage migration inhibitory factor (glycosylation-inhibiting factor)	4282	ENSG00000240972
ILMN_1940551	-0.7259	MKNK2	MAP kinase interacting serine/threonine kinase 2	2872	ENSG00000099875
ILMN_380239	-0.6709	MKS1	Meckel syndrome, type 1	54903	ENSG00000011143
ILMN_730092	0.675	MLIP	muscular LMNA-interacting protein	90523	ENSG00000146147
ILMN_1340114	0.6967	MLLT11	myeloid/lymphoid or mixed-lineage leukemia (trithorax homolog, Drosophila); translocated to, 11	10962	ENSG00000213190
ILMN_2100286	0.7218	MOAP1	modulator of apoptosis 1	64112	ENSG00000165943
ILMN_2760288	0.6876	MOB4	MOB family member 4, phocein	25843	ENSG00000115540
ILMN_110026	0.6666	MOCS2	molybdenum cofactor synthesis 2	4338	ENSG00000164172
ILMN_5700601	0.6703	MORF4L2	mortality factor 4 like 2	9643	ENSG00000123562
ILMN_840021	0.6705	MPC2	mitochondrial pyruvate carrier 2	25874	ENSG00000143158
ILMN_7000315	0.7764	MRPL15	mitochondrial ribosomal protein L15	29088	ENSG00000137547
ILMN_3610338	0.68	MRPS23	mitochondrial ribosomal protein S23	51649	ENSG00000181610
ILMN_6040193	0.7142	MRPS30	mitochondrial ribosomal protein S30	10884	ENSG00000112996
ILMN_6100044	0.7827	MTCH1	mitochondrial carrier 1	23787	ENSG00000137409
ILMN_6860537	0.7262	MTX2	metaxin 2	10651	ENSG00000128654
ILMN_7000102	-0.7555	MUTYH	mutY homolog (E. coli)	4595	ENSG00000132781
ILMN_3800546	-0.6757	MXD4	MAX dimerization protein 4	10608	ENSG00000123933
ILMN_870717	-0.7008	MYT1	myelin transcription factor 1	4661	ENSG00000196132
ILMN_580044	-0.7525	MZT2B	mitotic spindle organizing protein 2B	80097	ENSG00000152082
ILMN_3840563	0.7391	NCALD	neurocalcin delta	83988	ENSG00000104490
ILMN_5290181	0.6922	NCEH1	neutral cholesterol ester hydrolase 1	57552	ENSG00000144959
ILMN_3120537	0.7251	NDN	necdin homolog (mouse)	4692	ENSG00000182636
ILMN_5890647	0.7027	NDUFA8	NADH dehydrogenase (ubiquinone) 1 alpha subcomplex, 8, 19kDa	4702	ENSG00000119421
ILMN_5220377	0.7577	NDUFB1	NADH dehydrogenase (ubiquinone) 1 beta subcomplex, 1, 7kDa	4707	ENSG00000183648
ILMN_5890048	0.6779	NDUFB5	NADH dehydrogenase (ubiquinone) 1 beta subcomplex, 5, 16kDa	4711	ENSG00000136521
ILMN_3170451	0.7301	NEFM	neurofilament, medium polypeptide	4741	ENSG00000104722
ILMN_70136	0.6918	NELL1	NEL-like 1 (chicken)	4745	ENSG00000165973
ILMN_7000735	0.7484	NGEF	neuronal guanine nucleotide exchange factor	25791	ENSG00000066248
ILMN_3780358	0.7168	NGFRAP1	nerve growth factor receptor (TNFRSF16) associated protein 1	27018	ENSG00000166681
ILMN_4060253	-0.7062	NINL	ninein-like	22981	ENSG00000101004
ILMN_1780333	0.7631	NME1	NME/NM23 nucleoside diphosphate kinase 1	4830	ENSG00000239672
ILMN_6020068	0.6619	NRBF2	nuclear receptor binding factor 2	29982	ENSG00000148572
ILMN_5220136	0.6749	NRSN1	neurensin 1	140767	ENSG00000152954
ILMN_6180181	0.7125	NSF	N-ethylmaleimide-sensitive factor	4905	ENSG00000073969
ILMN_7050176	0.6767	NT5DC3	5'-nucleotidase domain containing 3	51559	ENSG00000111696
ILMN_2850128	0.7258	NUDT11	nudix (nucleoside diphosphate linked moiety X)-type motif 11	55190	ENSG00000196368
ILMN_3140369	0.663	NUDT14	nudix (nucleoside diphosphate linked moiety X)-type motif 14	256281	ENSG00000183828
ILMN_3940538	0.6976	NUDT4	nudix (nucleoside diphosphate linked moiety X)-type motif 4	11163	ENSG00000173598
ILMN_5050091	0.7728	OAT	ornithine aminotransferase	4942	ENSG00000065154
ILMN_1090242	0.6826	OLFM1	olfactomedin 1	10439	ENSG00000130558
ILMN_5080142	0.7472	OPA1	optic atrophy 1 (autosomal dominant)	4976	ENSG00000198836
ILMN_3780082	0.6897	PACSIN1	protein kinase C and casein kinase substrate in neurons 1	29993	ENSG00000124507
ILMN_4810181	0.6712	PAK1	p21 protein (Cdc42/Rac)-activated kinase 1	5058	ENSG00000149269
ILMN_5910750	0.7729	PAK3	p21 protein (Cdc42/Rac)-activated kinase 3	5063	ENSG00000077264
ILMN_60056	0.704	PAM	peptidylglycine alpha-amidating monooxygenase	5066	ENSG00000145730
ILMN_3140670	-0.7354	PAX6	paired box 6	5080	ENSG00000007372
ILMN_1240711	-0.6919	PCBP4	poly(rC) binding protein 4	57060	ENSG00000090097
ILMN_3990347	0.6698	PCMT1	protein-L-isoaspartate (D-aspartate) O-methyltransferase	5110	ENSG00000120265
ILMN_2340537	0.7399	PCSK2	proprotein convertase subtilisin/kexin type 2	5126	ENSG00000125851
ILMN_6200072	0.731	PDHB	pyruvate dehydrogenase (lipoamide) beta	5162	ENSG00000168291
ILMN_4540671	0.6781	PET112	PET112 homolog (yeast)	5188	ENSG00000059691
ILMN_5340039	0.7061	PEX11B	peroxisomal biogenesis factor 11 beta	8799	ENSG00000131779
ILMN_5860139	0.6675	PEX19	peroxisomal biogenesis factor 19	5824	ENSG00000162735
ILMN_2640446	0.6674	PFDN1	prefoldin subunit 1	5201	ENSG00000113068
ILMN_6620372	-0.6839	PFKFB4	6-phosphofructo-2-kinase/fructose-2,6-biphosphatase 4	5210	ENSG00000114268
ILMN_4920731	0.7411	PFN2	profilin 2	5217	ENSG00000070087
ILMN_2100092	0.7707	PGM2L1	phosphoglucomutase 2-like 1	283209	ENSG00000165434
ILMN_780601	-0.7529	PHKA2	phosphorylase kinase, alpha 2 (liver)	5256	ENSG00000044446
ILMN_1190181	0.7232	PHYHIPL	phytanoyl-CoA 2-hydroxylase interacting protein-like	84457	ENSG00000165443
ILMN_5220020	0.6674	PIAS2	protein inhibitor of activated STAT, 2	9063	ENSG00000078043
ILMN_1780685	-0.7377	PIDD	p53-induced death domain protein	55367	ENSG00000177595
ILMN_6020050	0.6614	PIGY	phosphatidylinositol glycan anchor biosynthesis, class Y	84992	ENSG00000145337
ILMN_3130750	0.7021	PIP4K2C	phosphatidylinositol-5-phosphate 4-kinase, type II, gamma	79837	ENSG00000166908
ILMN_780041	0.7852	PLK2	polo-like kinase 2	10769	ENSG00000145632
ILMN_430164	-0.683	PLXNB2	plexin B2	23654	ENSG00000196576
ILMN_5420301	0.6855	PNMA1	paraneoplastic Ma antigen 1	9240	ENSG00000176903
ILMN_670086	0.8216	PNMA2	paraneoplastic Ma antigen 2	10687	ENSG00000240694
ILMN_3290279	-0.7483	POLD1	polymerase (DNA directed), delta 1, catalytic subunit	5424	ENSG00000062822
ILMN_70692	0.664	POLR2K	polymerase (RNA) II (DNA directed) polypeptide K, 7.0kDa	5440	ENSG00000147669
ILMN_5360040	-0.6833	POMT2	protein-O-mannosyltransferase 2	29954	ENSG00000009830
ILMN_1170100	0.7746	POP4	processing of precursor 4, ribonuclease P/MRP subunit (S. cerevisiae)	10775	ENSG00000105171
ILMN_580270	-0.733	POU2F1	POU class 2 homeobox 1	5451	ENSG00000143190
ILMN_6130022	-0.7058	POU2F2	POU class 2 homeobox 2	5452	ENSG00000028277
ILMN_780731	0.7132	PPP1R11	protein phosphatase 1, regulatory (inhibitor) subunit 11	6992	ENSG00000204619
ILMN_6980253	0.6862	PPP1R14C	protein phosphatase 1, regulatory (inhibitor) subunit 14C	81706	ENSG00000198729
ILMN_70066	0.6677	PPP2R2B	protein phosphatase 2, regulatory subunit B, beta	5521	ENSG00000156475
ILMN_4050148	0.6642	PPP2R2C	protein phosphatase 2, regulatory subunit B, gamma	5522	ENSG00000074211
ILMN_50435	0.6932	PPP4R4	protein phosphatase 4, regulatory subunit 4	57718	ENSG00000119698
ILMN_3130520	-0.6893	PRDM2	PR domain containing 2, with ZNF domain	7799	ENSG00000116731
ILMN_4210575	0.6823	PRKAR2B	protein kinase, cAMP-dependent, regulatory, type II, beta	5577	ENSG00000005249
ILMN_6770324	0.745	PRMT3	protein arginine methyltransferase 3	10196	ENSG00000185238
ILMN_130044	-0.7413	PROM2	prominin 2	150696	ENSG00000155066
ILMN_2320484	0.6714	PSMA5	proteasome (prosome, macropain) subunit, alpha type, 5	5686	ENSG00000143106
ILMN_450139	0.6962	PSMG1	proteasome (prosome, macropain) assembly chaperone 1	8624	ENSG00000183527
ILMN_4780156	-0.76	PTBP1	polypyrimidine tract binding protein 1	5725	ENSG00000011304
ILMN_380292	-0.6993	PTDSS2	phosphatidylserine synthase 2	81490	ENSG00000174915
ILMN_4200446	0.8497	PTPRN2	protein tyrosine phosphatase, receptor type, N polypeptide 2	5799	ENSG00000155093
ILMN_6980280	0.722	PTRH2	peptidyl-tRNA hydrolase 2	51651	ENSG00000141378
ILMN_3870402	-0.6748	QTRTD1	queuine tRNA-ribosyltransferase domain containing 1	79691	ENSG00000151576
ILMN_5670092	0.673	RAB1A	RAB1A, member RAS oncogene family	5861	ENSG00000138069
ILMN_3170348	0.7814	RAB22A	RAB22A, member RAS oncogene family	57403	ENSG00000124209
ILMN_1850280	0.6987	RAB5A	RAB5A, member RAS oncogene family	5868	ENSG00000144566
ILMN_7050161	0.6692	RAN	RAN, member RAS oncogene family	5901	ENSG00000132341
ILMN_4150300	-0.6618	RBM38	RNA binding motif protein 38	55544	ENSG00000132819
ILMN_2680487	0.7294	RC3H1	ring finger and CCCH-type domains 1	149041	ENSG00000135870
ILMN_2850541	-0.676	RDH5	retinol dehydrogenase 5 (11-cis/9-cis)	5959	ENSG00000135437
ILMN_7050164	-0.6658	RECQL4	RecQ protein-like 4	9401	NULL
ILMN_2120292	0.7522	REEP1	receptor accessory protein 1	65055	ENSG00000068615
ILMN_7000347	-0.7475	RFX1	regulatory factor X, 1 (influences HLA class II expression)	5989	ENSG00000132005
ILMN_6900066	0.8312	RGS4	regulator of G-protein signaling 4	5999	ENSG00000117152
ILMN_5390181	0.7302	RGS6	regulator of G-protein signaling 6	9628	ENSG00000182732
ILMN_1090041	0.69	RNASEH2B	ribonuclease H2, subunit B	79621	ENSG00000136104
ILMN_1410156	-0.7377	ROR1	receptor tyrosine kinase-like orphan receptor 1	4919	ENSG00000185483
ILMN_2680315	0.6831	RPL26L1	ribosomal protein L26-like 1	51121	ENSG00000037241
ILMN_60364	0.6955	RPP40	ribonuclease P/MRP 40kDa subunit	10799	ENSG00000124787
ILMN_6770563	-0.662	RPS6KA1	ribosomal protein S6 kinase, 90kDa, polypeptide 1	6195	ENSG00000117676
ILMN_840731	-0.6716	RSU1	Ras suppressor protein 1	6251	ENSG00000148484
ILMN_6200301	0.7764	RTN3	reticulon 3	10313	ENSG00000133318
ILMN_2690450	0.6798	RTN4IP1	reticulon 4 interacting protein 1	84816	ENSG00000130347
ILMN_2510441	0.7157	SATB2	SATB homeobox 2	23314	ENSG00000119042
ILMN_6350746	0.6615	SC5DL	sterol-C5-desaturase (ERG3 delta-5-desaturase homolog, S. cerevisiae)-like	6309	ENSG00000109929
ILMN_4560280	0.751	SCG2	secretogranin II	7857	ENSG00000171951
ILMN_510750	0.7234	SCG5	secretogranin V (7B2 protein)	6447	ENSG00000166922
ILMN_2690324	0.6742	SHOC2	soc-2 suppressor of clear homolog (C. elegans)	8036	ENSG00000108061
ILMN_2450093	0.7061	SLBP	stem-loop binding protein	7884	ENSG00000163950
ILMN_6400577	0.679	SLC17A7	solute carrier family 17 (sodium-dependent inorganic phosphate cotransporter), member 7	57030	ENSG00000104888
ILMN_1780750	-0.7279	SLC27A1	solute carrier family 27 (fatty acid transporter), member 1	376497	ENSG00000130304
ILMN_6550047	0.7099	SLC30A3	solute carrier family 30 (zinc transporter), member 3	7781	ENSG00000115194
ILMN_1050056	0.7838	SLC9A6	solute carrier family 9, subfamily A (NHE6, cation proton antiporter 6), member 6	10479	ENSG00000198689
ILMN_1190056	-0.687	SLFN13	schlafen family member 13	146857	ENSG00000154760
ILMN_110520	0.6918	SLIRP	SRA stem-loop interacting RNA binding protein	81892	ENSG00000119705
ILMN_5700685	-0.7176	SMAD5	SMAD family member 5	4090	ENSG00000113658
ILMN_1450402	-0.6829	SMARCD2	SWI/SNF related, matrix associated, actin dependent regulator of chromatin, subfamily d, member 2	6603	ENSG00000108604
ILMN_6040113	0.7867	SMYD2	SET and MYND domain containing 2	56950	ENSG00000143499
ILMN_4070292	0.713	SNCA	synuclein, alpha (non A4 component of amyloid precursor)	6622	ENSG00000145335
ILMN_6400025	0.6991	SNX10	sorting nexin 10	29887	ENSG00000086300
ILMN_130315	0.6833	SOD1	superoxide dismutase 1, soluble	6647	ENSG00000142168
ILMN_3850324	-0.7118	SORBS3	sorbin and SH3 domain containing 3	10174	ENSG00000120896
ILMN_7100338	0.6961	SRD5A1	steroid-5-alpha-reductase, alpha polypeptide 1 (3-oxo-5 alpha-steroid delta 4-dehydrogenase alpha 1)	6715	ENSG00000145545
ILMN_5340736	-0.6723	SRGAP1	SLIT-ROBO Rho GTPase activating protein 1	57522	ENSG00000196935
ILMN_4120717	0.7359	STAR	steroidogenic acute regulatory protein	6770	ENSG00000147465
ILMN_4670019	0.6707	STAU2	staufen, RNA binding protein, homolog 2 (Drosophila)	27067	ENSG00000040341
ILMN_5550372	0.7186	STK24	serine/threonine kinase 24	8428	ENSG00000102572
ILMN_580075	-0.6701	STK38	serine/threonine kinase 38	11329	ENSG00000112079
ILMN_3450056	0.677	STMN1	stathmin 1	3925	ENSG00000117632
ILMN_6450341	0.6633	STXBP1	syntaxin binding protein 1	6812	ENSG00000136854
ILMN_2510528	-0.678	SUFU	suppressor of fused homolog (Drosophila)	51684	ENSG00000107882
ILMN_1230632	-0.6971	SUV420H1	suppressor of variegation 4-20 homolog 1 (Drosophila)	51111	ENSG00000110066
ILMN_3290292	0.7098	SYNGR3	synaptogyrin 3	9143	ENSG00000127561
ILMN_4480735	-0.6997	SYNJ2BP	synaptojanin 2 binding protein	55333	ENSG00000213463
ILMN_6520609	0.6759	SYP	synaptophysin	6855	ENSG00000102003
ILMN_2340301	0.6841	TAX1BP1	Tax1 (human T-cell leukemia virus type I) binding protein 1	8887	ENSG00000106052
ILMN_5890167	-0.7121	TAZ	tafazzin	6901	ENSG00000102125
ILMN_3940463	-0.6624	TBC1D20	TBC1 domain family, member 20	128637	ENSG00000125875
ILMN_2900400	-0.6698	TCAP	titin-cap	8557	ENSG00000173991
ILMN_4610154	-0.6687	TGM1	transglutaminase 1 (K polypeptide epidermal type I, protein-glutamine-gamma-glutamyltransferase)	7051	ENSG00000092295
ILMN_4850019	0.7087	THOC7	THO complex 7 homolog (Drosophila)	80145	ENSG00000163634
ILMN_3450685	0.7051	TMEM130	transmembrane protein 130	222865	ENSG00000166448
ILMN_450138	0.6908	TMSB10	thymosin beta 10	9168	ENSG00000034510
ILMN_5570102	-0.7184	TNXB	tenascin XB	7148	ENSG00000168477
ILMN_6100156	0.7037	TOMM20	translocase of outer mitochondrial membrane 20 homolog (yeast)	9804	ENSG00000173726
ILMN_6420279	-0.6627	TRIM73	tripartite motif containing 73	375593	ENSG00000178809
ILMN_6770575	0.6924	TSPYL5	TSPY-like 5	85453	ENSG00000180543
ILMN_1190129	0.671	TTC1	tetratricopeptide repeat domain 1	7265	ENSG00000113312
ILMN_4670131	0.7123	TUBB4A	tubulin, beta 4A class IVa	10382	ENSG00000104833
ILMN_5360722	0.7527	TUSC2	tumor suppressor candidate 2	11334	ENSG00000114383
ILMN_1980193	0.706	TXN	thioredoxin	7295	ENSG00000136810
ILMN_1690592	0.7559	UBE2N	ubiquitin-conjugating enzyme E2N	7334	ENSG00000177889
ILMN_6040601	0.738	UBE2T	ubiquitin-conjugating enzyme E2T (putative)	29089	ENSG00000077152
ILMN_4760504	0.6648	UBL5	ubiquitin-like 5	59286	ENSG00000198258
ILMN_380735	0.675	UBLCP1	ubiquitin-like domain containing CTD phosphatase 1	134510	ENSG00000164332
ILMN_6980112	0.7717	UCHL1	ubiquitin carboxyl-terminal esterase L1 (ubiquitin thiolesterase)	7345	ENSG00000154277
ILMN_6860014	0.6807	UGP2	UDP-glucose pyrophosphorylase 2	7360	ENSG00000169764
ILMN_5270164	0.6912	UQCR11	ubiquinol-cytochrome c reductase, complex III subunit XI	10975	ENSG00000127540
ILMN_5050064	0.7434	UQCRQ	ubiquinol-cytochrome c reductase, complex III subunit VII, 9.5kDa	27089	ENSG00000164405
ILMN_1850309	-0.6611	VARS2	valyl-tRNA synthetase 2, mitochondrial (putative)	57176	ENSG00000137411
ILMN_5690121	0.7321	VDAC1	voltage-dependent anion channel 1	7416	ENSG00000213585
ILMN_3170332	0.6854	VPS35	vacuolar protein sorting 35 homolog (S. cerevisiae)	55737	ENSG00000069329
ILMN_4850184	0.7446	WASF1	WAS protein family, member 1	8936	ENSG00000112290
ILMN_6040026	0.7254	WASL	Wiskott-Aldrich syndrome-like	8976	ENSG00000106299
ILMN_5570161	-0.6929	WDR6	WD repeat domain 6	11180	ENSG00000178252
ILMN_2060364	-0.6674	WHSC2	Wolf-Hirschhorn syndrome candidate 2	7469	ENSG00000185049
ILMN_3800270	-0.6705	XPNPEP3	X-prolyl aminopeptidase (aminopeptidase P) 3, putative	63929	ENSG00000196236
ILMN_4230452	0.7434	YWHAH	tyrosine 3-monooxygenase/tryptophan 5-monooxygenase activation protein, eta polypeptide	7533	ENSG00000128245
ILMN_4610019	-0.6618	ZBTB20	zinc finger and BTB domain containing 20	26137	ENSG00000181722
ILMN_4780048	-0.6815	ZNF175	zinc finger protein 175	7728	ENSG00000105497
ILMN_3130487	-0.6736	ZNF324	zinc finger protein 324	25799	ENSG00000083812
ILMN_6290605	-0.6694	ZNF417	zinc finger protein 417	147687	ENSG00000173480
ILMN_3170403	-0.6626	ZNF524	zinc finger protein 524	147807	ENSG00000171443
ILMN_4560066	-0.669	ZNF526	zinc finger protein 526	116115	ENSG00000167625
ILMN_1340278	-0.7509	ZNF546	zinc finger protein 546	339327	ENSG00000187187
ILMN_1050040	-0.7688	ZNF577	zinc finger protein 577	84765	ENSG00000161551
ILMN_6110114	-0.7224	ZNF791	zinc finger protein 791	163049	ENSG00000173875
ILMN_630112	-0.6671	ZNF827	zinc finger protein 827	152485	ENSG00000151612
ILMN_1990086	0.671	ZNHIT3	zinc finger, HIT-type containing 3	9326	ENSG00000108278
cellular component::mitochondrial membrane::GO:0031966
C=466;O=32;E=13.04;R=2.45;rawP=2.84e-06;adjP=0.0001
Probe Set	r (cortex)	Symbol	Name	Entrez ID	Ensemble Gene ID
ILMN_4780519	0.7147	AGK	acylglycerol kinase	55750	ENSG00000006530
ILMN_3710458	0.7219	ATP5C1	ATP synthase, H+ transporting, mitochondrial F1 complex, gamma polypeptide 1	509	ENSG00000165629
ILMN_5720368	0.6835	ATP5F1	ATP synthase, H+ transporting, mitochondrial Fo complex, subunit B1	515	ENSG00000116459
ILMN_6350400	0.6787	ATP5G3	ATP synthase, H+ transporting, mitochondrial Fo complex, subunit C3 (subunit 9)	518	ENSG00000154518
ILMN_6020148	0.8006	ATP5H	ATP synthase, H+ transporting, mitochondrial Fo complex, subunit d	10476	ENSG00000167863
ILMN_380195	0.6953	ATPIF1	ATPase inhibitory factor 1	93974	ENSG00000130770
ILMN_2480068	0.7861	C14orf2	chromosome 14 open reading frame 2	9556	ENSG00000156411
ILMN_6900619	0.7077	CCS	copper chaperone for superoxide dismutase	9973	ENSG00000173992
ILMN_4560239	0.6652	CHCHD6	coiled-coil-helix-coiled-coil-helix domain containing 6	84303	ENSG00000159685
ILMN_6200408	0.706	COQ10B	coenzyme Q10 homolog B (S. cerevisiae)	80219	ENSG00000115520
ILMN_3170070	0.7387	COX5A	cytochrome c oxidase subunit Va	9377	ENSG00000178741
ILMN_5390010	0.8082	COX6C	cytochrome c oxidase subunit VIc	1345	ENSG00000164919
ILMN_7000497	0.7462	COX7B	cytochrome c oxidase subunit VIIb	1349	ENSG00000131174
ILMN_2690093	0.7029	GHITM	growth hormone inducible transmembrane protein	27069	ENSG00000165678
ILMN_840021	0.6705	MPC2	mitochondrial pyruvate carrier 2	25874	ENSG00000143158
ILMN_6100044	0.7827	MTCH1	mitochondrial carrier 1	23787	ENSG00000137409
ILMN_6860537	0.7262	MTX2	metaxin 2	10651	ENSG00000128654
ILMN_5890647	0.7027	NDUFA8	NADH dehydrogenase (ubiquinone) 1 alpha subcomplex, 8, 19kDa	4702	ENSG00000119421
ILMN_5220377	0.7577	NDUFB1	NADH dehydrogenase (ubiquinone) 1 beta subcomplex, 1, 7kDa	4707	ENSG00000183648
ILMN_5890048	0.6779	NDUFB5	NADH dehydrogenase (ubiquinone) 1 beta subcomplex, 5, 16kDa	4711	ENSG00000136521
ILMN_5080142	0.7472	OPA1	optic atrophy 1 (autosomal dominant)	4976	ENSG00000198836
ILMN_70066	0.6677	PPP2R2B	protein phosphatase 2, regulatory subunit B, beta	5521	ENSG00000156475
ILMN_4210575	0.6823	PRKAR2B	protein kinase, cAMP-dependent, regulatory, type II, beta	5577	ENSG00000005249
ILMN_2120292	0.7522	REEP1	receptor accessory protein 1	65055	ENSG00000068615
ILMN_1780750	-0.7279	SLC27A1	solute carrier family 27 (fatty acid transporter), member 1	376497	ENSG00000130304
ILMN_4480735	-0.6997	SYNJ2BP	synaptojanin 2 binding protein	55333	ENSG00000213463
ILMN_5890167	-0.7121	TAZ	tafazzin	6901	ENSG00000102125
ILMN_6100156	0.7037	TOMM20	translocase of outer mitochondrial membrane 20 homolog (yeast)	9804	ENSG00000173726
ILMN_5270164	0.6912	UQCR11	ubiquinol-cytochrome c reductase, complex III subunit XI	10975	ENSG00000127540
ILMN_5050064	0.7434	UQCRQ	ubiquinol-cytochrome c reductase, complex III subunit VII, 9.5kDa	27089	ENSG00000164405
ILMN_5690121	0.7321	VDAC1	voltage-dependent anion channel 1	7416	ENSG00000213585
ILMN_4850184	0.7446	WASF1	WAS protein family, member 1	8936	ENSG00000112290
cellular component::mitochondrial envelope::GO:0005740
C=487;O=33;E=13.63;R=2.42;rawP=2.64e-06;adjP=0.0001
Probe Set	r (cortex)	Symbol	Name	Entrez ID	Ensemble Gene ID
ILMN_4780519	0.7147	AGK	acylglycerol kinase	55750	ENSG00000006530
ILMN_3710458	0.7219	ATP5C1	ATP synthase, H+ transporting, mitochondrial F1 complex, gamma polypeptide 1	509	ENSG00000165629
ILMN_5720368	0.6835	ATP5F1	ATP synthase, H+ transporting, mitochondrial Fo complex, subunit B1	515	ENSG00000116459
ILMN_6350400	0.6787	ATP5G3	ATP synthase, H+ transporting, mitochondrial Fo complex, subunit C3 (subunit 9)	518	ENSG00000154518
ILMN_6020148	0.8006	ATP5H	ATP synthase, H+ transporting, mitochondrial Fo complex, subunit d	10476	ENSG00000167863
ILMN_380195	0.6953	ATPIF1	ATPase inhibitory factor 1	93974	ENSG00000130770
ILMN_2480068	0.7861	C14orf2	chromosome 14 open reading frame 2	9556	ENSG00000156411
ILMN_6900619	0.7077	CCS	copper chaperone for superoxide dismutase	9973	ENSG00000173992
ILMN_4560239	0.6652	CHCHD6	coiled-coil-helix-coiled-coil-helix domain containing 6	84303	ENSG00000159685
ILMN_6200408	0.706	COQ10B	coenzyme Q10 homolog B (S. cerevisiae)	80219	ENSG00000115520
ILMN_3170070	0.7387	COX5A	cytochrome c oxidase subunit Va	9377	ENSG00000178741
ILMN_5390010	0.8082	COX6C	cytochrome c oxidase subunit VIc	1345	ENSG00000164919
ILMN_7000497	0.7462	COX7B	cytochrome c oxidase subunit VIIb	1349	ENSG00000131174
ILMN_2690093	0.7029	GHITM	growth hormone inducible transmembrane protein	27069	ENSG00000165678
ILMN_840021	0.6705	MPC2	mitochondrial pyruvate carrier 2	25874	ENSG00000143158
ILMN_6100044	0.7827	MTCH1	mitochondrial carrier 1	23787	ENSG00000137409
ILMN_6860537	0.7262	MTX2	metaxin 2	10651	ENSG00000128654
ILMN_5890647	0.7027	NDUFA8	NADH dehydrogenase (ubiquinone) 1 alpha subcomplex, 8, 19kDa	4702	ENSG00000119421
ILMN_5220377	0.7577	NDUFB1	NADH dehydrogenase (ubiquinone) 1 beta subcomplex, 1, 7kDa	4707	ENSG00000183648
ILMN_5890048	0.6779	NDUFB5	NADH dehydrogenase (ubiquinone) 1 beta subcomplex, 5, 16kDa	4711	ENSG00000136521
ILMN_5080142	0.7472	OPA1	optic atrophy 1 (autosomal dominant)	4976	ENSG00000198836
ILMN_70066	0.6677	PPP2R2B	protein phosphatase 2, regulatory subunit B, beta	5521	ENSG00000156475
ILMN_4210575	0.6823	PRKAR2B	protein kinase, cAMP-dependent, regulatory, type II, beta	5577	ENSG00000005249
ILMN_2120292	0.7522	REEP1	receptor accessory protein 1	65055	ENSG00000068615
ILMN_1780750	-0.7279	SLC27A1	solute carrier family 27 (fatty acid transporter), member 1	376497	ENSG00000130304
ILMN_4120717	0.7359	STAR	steroidogenic acute regulatory protein	6770	ENSG00000147465
ILMN_4480735	-0.6997	SYNJ2BP	synaptojanin 2 binding protein	55333	ENSG00000213463
ILMN_5890167	-0.7121	TAZ	tafazzin	6901	ENSG00000102125
ILMN_6100156	0.7037	TOMM20	translocase of outer mitochondrial membrane 20 homolog (yeast)	9804	ENSG00000173726
ILMN_5270164	0.6912	UQCR11	ubiquinol-cytochrome c reductase, complex III subunit XI	10975	ENSG00000127540
ILMN_5050064	0.7434	UQCRQ	ubiquinol-cytochrome c reductase, complex III subunit VII, 9.5kDa	27089	ENSG00000164405
ILMN_5690121	0.7321	VDAC1	voltage-dependent anion channel 1	7416	ENSG00000213585
ILMN_4850184	0.7446	WASF1	WAS protein family, member 1	8936	ENSG00000112290
cellular component::neuron projection::GO:0043005
C=624;O=39;E=17.46;R=2.23;rawP=2.34e-06;adjP=0.0001
Probe Set	r (cortex)	Symbol	Name	Entrez ID	Ensemble Gene ID
ILMN_5890139	0.6653	ACOT7	acyl-CoA thioesterase 7	11332	ENSG00000097021
ILMN_1780446	-0.7618	AGER	advanced glycosylation end product-specific receptor	177	ENSG00000204305
ILMN_3120092	0.7251	ARHGAP32	Rho GTPase activating protein 32	9743	ENSG00000134909
ILMN_6130181	0.6782	ATP1A3	ATPase, Na+/K+ transporting, alpha 3 polypeptide	478	ENSG00000105409
ILMN_4010433	0.7402	ATXN10	ataxin 10	25814	ENSG00000130638
ILMN_1770059	0.717	BASP1	brain abundant, membrane attached signal protein 1	10409	ENSG00000176788
ILMN_6420528	0.8061	CCK	cholecystokinin	885	ENSG00000187094
ILMN_2340671	0.6977	CDC42	cell division cycle 42 (GTP binding protein, 25kDa)	998	ENSG00000070831
ILMN_4050088	0.6729	CHRM1	cholinergic receptor, muscarinic 1	1128	ENSG00000168539
ILMN_70497	0.7347	CNTNAP2	contactin associated protein-like 2	26047	ENSG00000174469
ILMN_1780463	0.6786	CXADR	coxsackie virus and adenovirus receptor	1525	ENSG00000154639
ILMN_4050086	0.6995	GABRA5	gamma-aminobutyric acid (GABA) A receptor, alpha 5	2558	ENSG00000186297
ILMN_6040136	0.7532	GAP43	growth associated protein 43	2596	ENSG00000172020
ILMN_6590725	0.7302	GOT1	glutamic-oxaloacetic transaminase 1, soluble (aspartate aminotransferase 1)	2805	ENSG00000120053
ILMN_3520039	-0.6691	GRIN2C	glutamate receptor, ionotropic, N-methyl D-aspartate 2C	2905	ENSG00000161509
ILMN_4730041	0.6807	KALRN	kalirin, RhoGEF kinase	8997	ENSG00000160145
ILMN_730497	0.6641	KCNJ4	potassium inwardly-rectifying channel, subfamily J, member 4	3761	ENSG00000168135
ILMN_1190619	0.6706	MAGEE1	melanoma antigen family E, 1	57692	ENSG00000198934
ILMN_1740347	0.7202	MAP2K1	mitogen-activated protein kinase kinase 1	5604	ENSG00000169032
ILMN_580471	0.7342	MAPK1	mitogen-activated protein kinase 1	5594	ENSG00000100030
ILMN_4150402	0.6995	NCAM2	neural cell adhesion molecule 2	4685	ENSG00000154654
ILMN_3170451	0.7301	NEFM	neurofilament, medium polypeptide	4741	ENSG00000104722
ILMN_7000735	0.7484	NGEF	neuronal guanine nucleotide exchange factor	25791	ENSG00000066248
ILMN_3940440	0.8045	NRCAM	neuronal cell adhesion molecule	4897	ENSG00000091129
ILMN_5220136	0.6749	NRSN1	neurensin 1	140767	ENSG00000152954
ILMN_6180181	0.7125	NSF	N-ethylmaleimide-sensitive factor	4905	ENSG00000073969
ILMN_5080142	0.7472	OPA1	optic atrophy 1 (autosomal dominant)	4976	ENSG00000198836
ILMN_4810181	0.6712	PAK1	p21 protein (Cdc42/Rac)-activated kinase 1	5058	ENSG00000149269
ILMN_4920731	0.7411	PFN2	profilin 2	5217	ENSG00000070087
ILMN_780041	0.7852	PLK2	polo-like kinase 2	10769	ENSG00000145632
ILMN_4200446	0.8497	PTPRN2	protein tyrosine phosphatase, receptor type, N polypeptide 2	5799	ENSG00000155093
ILMN_6180324	0.6876	RUFY3	RUN and FYVE domain containing 3	22902	ENSG00000018189
ILMN_6400577	0.679	SLC17A7	solute carrier family 17 (sodium-dependent inorganic phosphate cotransporter), member 7	57030	ENSG00000104888
ILMN_6550047	0.7099	SLC30A3	solute carrier family 30 (zinc transporter), member 3	7781	ENSG00000115194
ILMN_4070292	0.713	SNCA	synuclein, alpha (non A4 component of amyloid precursor)	6622	ENSG00000145335
ILMN_130315	0.6833	SOD1	superoxide dismutase 1, soluble	6647	ENSG00000142168
ILMN_7100338	0.6961	SRD5A1	steroid-5-alpha-reductase, alpha polypeptide 1 (3-oxo-5 alpha-steroid delta 4-dehydrogenase alpha 1)	6715	ENSG00000145545
ILMN_6520609	0.6759	SYP	synaptophysin	6855	ENSG00000102003
ILMN_4670131	0.7123	TUBB4A	tubulin, beta 4A class IVa	10382	ENSG00000104833
cellular component::mitochondrial inner membrane::GO:0005743
C=321;O=25;E=8.98;R=2.78;rawP=4.09e-06;adjP=0.0001
Probe Set	r (cortex)	Symbol	Name	Entrez ID	Ensemble Gene ID
ILMN_3710458	0.7219	ATP5C1	ATP synthase, H+ transporting, mitochondrial F1 complex, gamma polypeptide 1	509	ENSG00000165629
ILMN_5720368	0.6835	ATP5F1	ATP synthase, H+ transporting, mitochondrial Fo complex, subunit B1	515	ENSG00000116459
ILMN_6350400	0.6787	ATP5G3	ATP synthase, H+ transporting, mitochondrial Fo complex, subunit C3 (subunit 9)	518	ENSG00000154518
ILMN_6020148	0.8006	ATP5H	ATP synthase, H+ transporting, mitochondrial Fo complex, subunit d	10476	ENSG00000167863
ILMN_380195	0.6953	ATPIF1	ATPase inhibitory factor 1	93974	ENSG00000130770
ILMN_2480068	0.7861	C14orf2	chromosome 14 open reading frame 2	9556	ENSG00000156411
ILMN_6900619	0.7077	CCS	copper chaperone for superoxide dismutase	9973	ENSG00000173992
ILMN_4560239	0.6652	CHCHD6	coiled-coil-helix-coiled-coil-helix domain containing 6	84303	ENSG00000159685
ILMN_6200408	0.706	COQ10B	coenzyme Q10 homolog B (S. cerevisiae)	80219	ENSG00000115520
ILMN_3170070	0.7387	COX5A	cytochrome c oxidase subunit Va	9377	ENSG00000178741
ILMN_5390010	0.8082	COX6C	cytochrome c oxidase subunit VIc	1345	ENSG00000164919
ILMN_7000497	0.7462	COX7B	cytochrome c oxidase subunit VIIb	1349	ENSG00000131174
ILMN_2690093	0.7029	GHITM	growth hormone inducible transmembrane protein	27069	ENSG00000165678
ILMN_840021	0.6705	MPC2	mitochondrial pyruvate carrier 2	25874	ENSG00000143158
ILMN_6100044	0.7827	MTCH1	mitochondrial carrier 1	23787	ENSG00000137409
ILMN_5890647	0.7027	NDUFA8	NADH dehydrogenase (ubiquinone) 1 alpha subcomplex, 8, 19kDa	4702	ENSG00000119421
ILMN_5220377	0.7577	NDUFB1	NADH dehydrogenase (ubiquinone) 1 beta subcomplex, 1, 7kDa	4707	ENSG00000183648
ILMN_5890048	0.6779	NDUFB5	NADH dehydrogenase (ubiquinone) 1 beta subcomplex, 5, 16kDa	4711	ENSG00000136521
ILMN_5080142	0.7472	OPA1	optic atrophy 1 (autosomal dominant)	4976	ENSG00000198836
ILMN_4210575	0.6823	PRKAR2B	protein kinase, cAMP-dependent, regulatory, type II, beta	5577	ENSG00000005249
ILMN_1780750	-0.7279	SLC27A1	solute carrier family 27 (fatty acid transporter), member 1	376497	ENSG00000130304
ILMN_5890167	-0.7121	TAZ	tafazzin	6901	ENSG00000102125
ILMN_5270164	0.6912	UQCR11	ubiquinol-cytochrome c reductase, complex III subunit XI	10975	ENSG00000127540
ILMN_5050064	0.7434	UQCRQ	ubiquinol-cytochrome c reductase, complex III subunit VII, 9.5kDa	27089	ENSG00000164405
ILMN_5690121	0.7321	VDAC1	voltage-dependent anion channel 1	7416	ENSG00000213585
cellular component::intracellular part::GO:0044424
C=11101;O=348;E=310.67;R=1.12;rawP=7.07e-06;adjP=0.0002
Probe Set	r (cortex)	Symbol	Name	Entrez ID	Ensemble Gene ID
ILMN_4540020	-0.6911	ABHD14B	abhydrolase domain containing 14B	84836	ENSG00000114779
ILMN_5700037	0.6631	ACLY	ATP citrate lyase	47	ENSG00000131473
ILMN_5890139	0.6653	ACOT7	acyl-CoA thioesterase 7	11332	ENSG00000097021
ILMN_2230048	0.7437	ACP1	acid phosphatase 1, soluble	52	ENSG00000143727
ILMN_450594	-0.6875	ACSF2	acyl-CoA synthetase family member 2	80221	ENSG00000167107
ILMN_4610551	-0.7253	ACVR2B	activin A receptor, type IIB	93	ENSG00000114739
ILMN_7050113	-0.6787	AGBL5	ATP/GTP binding protein-like 5	60509	ENSG00000084693
ILMN_1780446	-0.7618	AGER	advanced glycosylation end product-specific receptor	177	ENSG00000204305
ILMN_4780519	0.7147	AGK	acylglycerol kinase	55750	ENSG00000006530
ILMN_5860707	0.7444	AK5	adenylate kinase 5	26289	ENSG00000154027
ILMN_5570750	0.6653	AKAP6	A kinase (PRKA) anchor protein 6	9472	ENSG00000151320
ILMN_4280088	0.6831	AKIRIN2	akirin 2	55122	ENSG00000135334
ILMN_4200390	0.6865	ALDOA	aldolase A, fructose-bisphosphate	226	ENSG00000149925
ILMN_2970746	0.674	AP2S1	adaptor-related protein complex 2, sigma 1 subunit	1175	ENSG00000042753
ILMN_6860114	0.7227	AP3S1	adaptor-related protein complex 3, sigma 1 subunit	1176	ENSG00000177879
ILMN_130180	-0.6775	AP5Z1	adaptor-related protein complex 5, zeta 1 subunit	9907	ENSG00000242802
ILMN_580100	-0.6794	APOBEC3A	apolipoprotein B mRNA editing enzyme, catalytic polypeptide-like 3A	200315	ENSG00000128383
ILMN_1090142	-0.732	ARAF	v-raf murine sarcoma 3611 viral oncogene homolog	369	ENSG00000078061
ILMN_840600	0.7189	ARF1	ADP-ribosylation factor 1	375	ENSG00000143761
ILMN_4480601	0.6791	ARF3	ADP-ribosylation factor 3	377	ENSG00000134287
ILMN_3120092	0.7251	ARHGAP32	Rho GTPase activating protein 32	9743	ENSG00000134909
ILMN_6200736	0.682	ARHGEF9	Cdc42 guanine nucleotide exchange factor (GEF) 9	23229	ENSG00000131089
ILMN_2120025	0.747	ARL1	ADP-ribosylation factor-like 1	400	ENSG00000120805
ILMN_6380731	0.6873	ARL8B	ADP-ribosylation factor-like 8B	55207	ENSG00000134108
ILMN_6380047	0.7255	ARPC1A	actin related protein 2/3 complex, subunit 1A, 41kDa	10552	ENSG00000241685
ILMN_460040	-0.7589	ATM	ataxia telangiectasia mutated	472	ENSG00000149311
ILMN_6130181	0.6782	ATP1A3	ATPase, Na+/K+ transporting, alpha 3 polypeptide	478	ENSG00000105409
ILMN_5900082	0.748	ATP2A2	ATPase, Ca++ transporting, cardiac muscle, slow twitch 2	488	ENSG00000174437
ILMN_2570341	0.6724	ATP2C1	ATPase, Ca++ transporting, type 2C, member 1	27032	ENSG00000017260
ILMN_3710458	0.7219	ATP5C1	ATP synthase, H+ transporting, mitochondrial F1 complex, gamma polypeptide 1	509	ENSG00000165629
ILMN_5720368	0.6835	ATP5F1	ATP synthase, H+ transporting, mitochondrial Fo complex, subunit B1	515	ENSG00000116459
ILMN_6350400	0.6787	ATP5G3	ATP synthase, H+ transporting, mitochondrial Fo complex, subunit C3 (subunit 9)	518	ENSG00000154518
ILMN_6020148	0.8006	ATP5H	ATP synthase, H+ transporting, mitochondrial Fo complex, subunit d	10476	ENSG00000167863
ILMN_7000692	0.6757	ATP6V1A	ATPase, H+ transporting, lysosomal 70kDa, V1 subunit A	523	ENSG00000114573
ILMN_5550592	0.6628	ATP6V1B2	ATPase, H+ transporting, lysosomal 56/58kDa, V1 subunit B2	526	ENSG00000147416
ILMN_770575	0.7431	ATP6V1C1	ATPase, H+ transporting, lysosomal 42kDa, V1 subunit C1	528	ENSG00000155097
ILMN_6860717	0.7754	ATP6V1D	ATPase, H+ transporting, lysosomal 34kDa, V1 subunit D	51382	ENSG00000100554
ILMN_3990112	0.7882	ATP6V1H	ATPase, H+ transporting, lysosomal 50/57kDa, V1 subunit H	51606	ENSG00000047249
ILMN_380195	0.6953	ATPIF1	ATPase inhibitory factor 1	93974	ENSG00000130770
ILMN_4010433	0.7402	ATXN10	ataxin 10	25814	ENSG00000130638
ILMN_1770059	0.717	BASP1	brain abundant, membrane attached signal protein 1	10409	ENSG00000176788
ILMN_1770021	-0.703	BAZ2B	bromodomain adjacent to zinc finger domain, 2B	29994	ENSG00000123636
ILMN_6220687	0.6786	BCCIP	BRCA2 and CDKN1A interacting protein	56647	ENSG00000107949
ILMN_6650438	0.6998	BEX1	brain expressed, X-linked 1	55859	ENSG00000133169
ILMN_2650040	-0.7202	BRAT1	BRCA1-associated ATM activator 1	221927	ENSG00000106009
ILMN_7000433	0.669	BTBD10	BTB (POZ) domain containing 10	84280	ENSG00000148925
ILMN_2480068	0.7861	C14orf2	chromosome 14 open reading frame 2	9556	ENSG00000156411
ILMN_2940129	0.7161	C17orf79	chromosome 17 open reading frame 79	55352	ENSG00000172301
ILMN_4010672	-0.6968	CACFD1	calcium channel flower domain containing 1	11094	ENSG00000160325
ILMN_4670128	0.7196	CACNG3	calcium channel, voltage-dependent, gamma subunit 3	10368	ENSG00000006116
ILMN_1780301	-0.7061	CACUL1	CDK2-associated, cullin domain 1	143384	ENSG00000151893
ILMN_2470435	0.6929	CADPS	Ca++-dependent secretion activator	8618	ENSG00000163618
ILMN_6100019	0.6744	CALM3	calmodulin 3 (phosphorylase kinase, delta)	808	ENSG00000160014
ILMN_3990687	0.7031	CBLC	Cbl proto-oncogene, E3 ubiquitin protein ligase C	23624	ENSG00000142273
ILMN_5290402	-0.7935	CBR4	carbonyl reductase 4	84869	ENSG00000145439
ILMN_6650170	-0.7158	CCDC88B	coiled-coil domain containing 88B	283234	ENSG00000168071
ILMN_1450673	0.7736	CCNA1	cyclin A1	8900	ENSG00000133101
ILMN_6370156	0.7737	CCND2	cyclin D2	894	ENSG00000118971
ILMN_6900619	0.7077	CCS	copper chaperone for superoxide dismutase	9973	ENSG00000173992
ILMN_2340671	0.6977	CDC42	cell division cycle 42 (GTP binding protein, 25kDa)	998	ENSG00000070831
ILMN_2690133	-0.7298	CEP164	centrosomal protein 164kDa	22897	ENSG00000110274
ILMN_1410575	0.7559	CEP41	centrosomal protein 41kDa	95681	ENSG00000106477
ILMN_1230072	-0.6782	CERS5	ceramide synthase 5	91012	ENSG00000139624
ILMN_3130132	-0.663	CGN	cingulin	57530	ENSG00000143375
ILMN_4560239	0.6652	CHCHD6	coiled-coil-helix-coiled-coil-helix domain containing 6	84303	ENSG00000159685
ILMN_6130100	0.8286	CHMP4B	charged multivesicular body protein 4B	128866	ENSG00000101421
ILMN_510368	0.7375	CHN1	chimerin (chimaerin) 1	1123	ENSG00000128656
ILMN_4120592	0.6934	CHP1	calcineurin-like EF hand protein 1	11261	ENSG00000187446
ILMN_4050088	0.6729	CHRM1	cholinergic receptor, muscarinic 1	1128	ENSG00000168539
ILMN_4810441	0.7013	CHST1	carbohydrate (keratan sulfate Gal-6) sulfotransferase 1	8534	ENSG00000175264
ILMN_60070	-0.758	CHST12	carbohydrate (chondroitin 4) sulfotransferase 12	55501	ENSG00000136213
ILMN_3710110	0.7614	CMAS	cytidine monophosphate N-acetylneuraminic acid synthetase	55907	ENSG00000111726
ILMN_1190097	0.6793	CMC2	COX assembly mitochondrial protein 2 homolog (S. cerevisiae)	56942	ENSG00000103121
ILMN_6380253	-0.7349	CNOT2	CCR4-NOT transcription complex, subunit 2	4848	ENSG00000111596
ILMN_70497	0.7347	CNTNAP2	contactin associated protein-like 2	26047	ENSG00000174469
ILMN_5910301	0.6989	COG1	component of oligomeric golgi complex 1	9382	ENSG00000166685
ILMN_1340750	-0.7366	COMMD5	COMM domain containing 5	28991	ENSG00000170619
ILMN_6350731	0.7201	COPG1	coatomer protein complex, subunit gamma 1	22820	ENSG00000181789
ILMN_2510603	0.7038	COPS8	COP9 constitutive photomorphogenic homolog subunit 8 (Arabidopsis)	10920	ENSG00000198612
ILMN_6200408	0.706	COQ10B	coenzyme Q10 homolog B (S. cerevisiae)	80219	ENSG00000115520
ILMN_3170070	0.7387	COX5A	cytochrome c oxidase subunit Va	9377	ENSG00000178741
ILMN_5390010	0.8082	COX6C	cytochrome c oxidase subunit VIc	1345	ENSG00000164919
ILMN_7000497	0.7462	COX7B	cytochrome c oxidase subunit VIIb	1349	ENSG00000131174
ILMN_6290609	-0.7797	CROCC	ciliary rootlet coiled-coil, rootletin	9696	ENSG00000058453
ILMN_3120647	-0.6815	CRYZL1	crystallin, zeta (quinone reductase)-like 1	9946	ENSG00000205758
ILMN_2940746	-0.6752	CTDSP2	CTD (carboxy-terminal domain, RNA polymerase II, polypeptide A) small phosphatase 2	10106	ENSG00000175215
ILMN_5890193	0.7542	CUL3	cullin 3	8452	ENSG00000036257
ILMN_1780463	0.6786	CXADR	coxsackie virus and adenovirus receptor	1525	ENSG00000154639
ILMN_2470433	-0.674	CXXC1	CXXC finger protein 1	30827	ENSG00000154832
ILMN_2650053	0.6836	CYP51A1	cytochrome P450, family 51, subfamily A, polypeptide 1	1595	ENSG00000001630
ILMN_430369	0.758	DCAF6	DDB1 and CUL4 associated factor 6	55827	ENSG00000143164
ILMN_1090056	-0.7016	DCLRE1C	DNA cross-link repair 1C	64421	ENSG00000152457
ILMN_2450037	0.6642	DDX1	DEAD (Asp-Glu-Ala-Asp) box helicase 1	1653	ENSG00000079785
ILMN_1170167	0.7131	DDX25	DEAD (Asp-Glu-Ala-Asp) box helicase 25	29118	ENSG00000109832
ILMN_6040309	-0.6798	DGCR8	DiGeorge syndrome critical region gene 8	54487	ENSG00000128191
ILMN_2370711	0.6992	DGKB	diacylglycerol kinase, beta 90kDa	1607	ENSG00000136267
ILMN_6860082	0.6691	DPY30	dpy-30 homolog (C. elegans)	84661	ENSG00000162961
ILMN_3190168	-0.6829	DTX2	deltex homolog 2 (Drosophila)	113878	ENSG00000091073
ILMN_5900731	0.7617	DYNLL1	dynein, light chain, LC8-type 1	8655	ENSG00000088986
ILMN_1770601	0.7057	EBNA1BP2	EBNA1 binding protein 2	10969	ENSG00000117395
ILMN_4780161	-0.7674	EDC3	enhancer of mRNA decapping 3 homolog (S. cerevisiae)	80153	ENSG00000179151
ILMN_50017	-0.6721	EEF1A1	eukaryotic translation elongation factor 1 alpha 1	1915	ENSG00000156508
ILMN_3940497	0.6928	EHD3	EH-domain containing 3	30845	ENSG00000013016
ILMN_1780397	0.733	EIF1	eukaryotic translation initiation factor 1	10209	ENSG00000173812
ILMN_4480041	0.6673	ELMOD1	ELMO/CED-12 domain containing 1	55531	ENSG00000110675
ILMN_70670	0.6893	EMC4	ER membrane protein complex subunit 4	51234	ENSG00000128463
ILMN_5080368	0.771	ENC1	ectodermal-neural cortex 1 (with BTB-like domain)	8507	ENSG00000171617
ILMN_1580164	0.6688	ENY2	enhancer of yellow 2 homolog (Drosophila)	56943	ENSG00000120533
ILMN_4280497	0.6658	ERLEC1	endoplasmic reticulum lectin 1	27248	ENSG00000068912
ILMN_2510025	0.6844	EXOC6	exocyst complex component 6	54536	ENSG00000138190
ILMN_3800168	-0.6763	EXOSC2	exosome component 2	23404	ENSG00000130713
ILMN_2360427	0.7058	FABP3	fatty acid binding protein 3, muscle and heart (mammary-derived growth inhibitor)	2170	ENSG00000121769
ILMN_5080079	-0.7114	FANCC	Fanconi anemia, complementation group C	2176	ENSG00000158169
ILMN_5420315	-0.6668	FANCE	Fanconi anemia, complementation group E	2178	ENSG00000112039
ILMN_5270358	0.7542	FAR2	fatty acyl CoA reductase 2	55711	ENSG00000064763
ILMN_4010292	0.738	FBXL2	F-box and leucine-rich repeat protein 2	25827	ENSG00000153558
ILMN_2100132	-0.6679	FBXO38	F-box protein 38	81545	ENSG00000145868
ILMN_5420129	0.7059	FGF12	fibroblast growth factor 12	2257	ENSG00000114279
ILMN_3710086	0.6702	FKBP1B	FK506 binding protein 1B, 12.6 kDa	2281	ENSG00000119782
ILMN_6650541	0.7255	FOXG1	forkhead box G1	2290	ENSG00000176165
ILMN_1230497	0.7059	FRMPD2	FERM and PDZ domain containing 2	143162	ENSG00000170324
ILMN_2690093	0.7029	GHITM	growth hormone inducible transmembrane protein	27069	ENSG00000165678
ILMN_6660593	0.6983	GNAS	GNAS complex locus	2778	ENSG00000087460
ILMN_6590725	0.7302	GOT1	glutamic-oxaloacetic transaminase 1, soluble (aspartate aminotransferase 1)	2805	ENSG00000120053
ILMN_3520039	-0.6691	GRIN2C	glutamate receptor, ionotropic, N-methyl D-aspartate 2C	2905	ENSG00000161509
ILMN_6370504	0.6975	GRSF1	G-rich RNA sequence binding factor 1	2926	ENSG00000132463
ILMN_6130279	0.6743	GUCY1B3	guanylate cyclase 1, soluble, beta 3	2983	ENSG00000061918
ILMN_5900008	0.7398	HAGH	hydroxyacylglutathione hydrolase	3029	ENSG00000063854
ILMN_630047	-0.7474	HEXDC	hexosaminidase (glycosyl hydrolase family 20, catalytic domain) containing	284004	ENSG00000169660
ILMN_2320593	0.7874	HINT1	histidine triad nucleotide binding protein 1	3094	ENSG00000169567
ILMN_4560433	0.7114	HMP19	HMP19 protein	51617	ENSG00000170091
ILMN_1450528	0.7377	HPRT1	hypoxanthine phosphoribosyltransferase 1	3251	ENSG00000165704
ILMN_70452	0.6955	HSPB3	heat shock 27kDa protein 3	8988	ENSG00000169271
ILMN_3190270	0.681	HSPH1	heat shock 105kDa/110kDa protein 1	10808	ENSG00000120694
ILMN_4780162	-0.6731	HYAL1	hyaluronoglucosaminidase 1	3373	ENSG00000114378
ILMN_6220619	-0.7453	IKBKB	inhibitor of kappa light polypeptide gene enhancer in B-cells, kinase beta	3551	ENSG00000104365
ILMN_6660008	-0.7377	IKZF4	IKAROS family zinc finger 4 (Eos)	64375	ENSG00000123411
ILMN_730398	0.6789	IMP3	IMP3, U3 small nucleolar ribonucleoprotein, homolog (yeast)	55272	NULL
ILMN_2810280	0.7836	ISCU	iron-sulfur cluster scaffold homolog (E. coli)	23479	ENSG00000136003
ILMN_5720100	0.7681	JAKMIP1	janus kinase and microtubule interacting protein 1	152789	ENSG00000152969
ILMN_4730041	0.6807	KALRN	kalirin, RhoGEF kinase	8997	ENSG00000160145
ILMN_4230541	-0.7375	KAT6A	K(lysine) acetyltransferase 6A	7994	ENSG00000083168
ILMN_730497	0.6641	KCNJ4	potassium inwardly-rectifying channel, subfamily J, member 4	3761	ENSG00000168135
ILMN_6650162	-0.6628	KIAA1683	KIAA1683	80726	ENSG00000130518
ILMN_5390156	0.7239	KLHL12	kelch-like 12 (Drosophila)	59349	ENSG00000117153
ILMN_6510075	0.7132	KPNA2	karyopherin alpha 2 (RAG cohort 1, importin alpha 1)	3838	ENSG00000182481
ILMN_1240520	0.7185	LANCL2	LanC lantibiotic synthetase component C-like 2 (bacterial)	55915	ENSG00000132434
ILMN_5550735	-0.728	LAT	linker for activation of T cells	27040	ENSG00000213658
ILMN_6760133	0.7843	LDB2	LIM domain binding 2	9079	ENSG00000169744
ILMN_5890152	0.7392	LDOC1	leucine zipper, down-regulated in cancer 1	23641	ENSG00000182195
ILMN_2470121	-0.6732	LEPREL2	leprecan-like 2	10536	ENSG00000110811
ILMN_6040451	-0.6702	LIMA1	LIM domain and actin binding 1	51474	ENSG00000050405
ILMN_7040465	-0.672	LIPT1	lipoyltransferase 1	51601	ENSG00000144182
ILMN_940114	0.7797	LMO4	LIM domain only 4	8543	ENSG00000143013
ILMN_6400152	0.7331	LNX1	ligand of numb-protein X 1, E3 ubiquitin protein ligase	84708	ENSG00000072201
ILMN_1770519	-0.7455	LRCH4	leucine-rich repeats and calponin homology (CH) domain containing 4	4034	ENSG00000077454
ILMN_2630129	0.6718	MAGED1	melanoma antigen family D, 1	9500	ENSG00000179222
ILMN_1190619	0.6706	MAGEE1	melanoma antigen family E, 1	57692	ENSG00000198934
ILMN_5360711	0.6645	MALSU1	mitochondrial assembly of ribosomal large subunit 1	115416	ENSG00000156928
ILMN_1740347	0.7202	MAP2K1	mitogen-activated protein kinase kinase 1	5604	ENSG00000169032
ILMN_3060600	0.7168	MAP2K4	mitogen-activated protein kinase kinase 4	6416	ENSG00000065559
ILMN_4150167	-0.7527	MAP3K3	mitogen-activated protein kinase kinase kinase 3	4215	ENSG00000198909
ILMN_580471	0.7342	MAPK1	mitogen-activated protein kinase 1	5594	ENSG00000100030
ILMN_940497	0.7503	MAPK10	mitogen-activated protein kinase 10	5602	ENSG00000109339
ILMN_5720139	0.6732	MCF2	MCF.2 cell line derived transforming sequence	4168	ENSG00000101977
ILMN_2850398	0.7321	MCTS1	malignant T cell amplified sequence 1	28985	ENSG00000232119
ILMN_430131	0.754	MDH1	malate dehydrogenase 1, NAD (soluble)	4190	ENSG00000014641
ILMN_1980465	0.6758	MEAF6	MYST/Esa1-associated factor 6	64769	ENSG00000163875
ILMN_3450176	0.6743	MEF2C	myocyte enhancer factor 2C	4208	ENSG00000081189
ILMN_610279	1	MGST3	microsomal glutathione S-transferase 3	4259	ENSG00000143198
ILMN_2470176	0.8065	MIF	macrophage migration inhibitory factor (glycosylation-inhibiting factor)	4282	ENSG00000240972
ILMN_1940551	-0.7259	MKNK2	MAP kinase interacting serine/threonine kinase 2	2872	ENSG00000099875
ILMN_380239	-0.6709	MKS1	Meckel syndrome, type 1	54903	ENSG00000011143
ILMN_730092	0.675	MLIP	muscular LMNA-interacting protein	90523	ENSG00000146147
ILMN_2100286	0.7218	MOAP1	modulator of apoptosis 1	64112	ENSG00000165943
ILMN_2760288	0.6876	MOB4	MOB family member 4, phocein	25843	ENSG00000115540
ILMN_110026	0.6666	MOCS2	molybdenum cofactor synthesis 2	4338	ENSG00000164172
ILMN_5700601	0.6703	MORF4L2	mortality factor 4 like 2	9643	ENSG00000123562
ILMN_840021	0.6705	MPC2	mitochondrial pyruvate carrier 2	25874	ENSG00000143158
ILMN_7000315	0.7764	MRPL15	mitochondrial ribosomal protein L15	29088	ENSG00000137547
ILMN_3610338	0.68	MRPS23	mitochondrial ribosomal protein S23	51649	ENSG00000181610
ILMN_6040193	0.7142	MRPS30	mitochondrial ribosomal protein S30	10884	ENSG00000112996
ILMN_6100044	0.7827	MTCH1	mitochondrial carrier 1	23787	ENSG00000137409
ILMN_6860537	0.7262	MTX2	metaxin 2	10651	ENSG00000128654
ILMN_7000102	-0.7555	MUTYH	mutY homolog (E. coli)	4595	ENSG00000132781
ILMN_3800546	-0.6757	MXD4	MAX dimerization protein 4	10608	ENSG00000123933
ILMN_870717	-0.7008	MYT1	myelin transcription factor 1	4661	ENSG00000196132
ILMN_580044	-0.7525	MZT2B	mitotic spindle organizing protein 2B	80097	ENSG00000152082
ILMN_3840563	0.7391	NCALD	neurocalcin delta	83988	ENSG00000104490
ILMN_5290181	0.6922	NCEH1	neutral cholesterol ester hydrolase 1	57552	ENSG00000144959
ILMN_3120537	0.7251	NDN	necdin homolog (mouse)	4692	ENSG00000182636
ILMN_5890647	0.7027	NDUFA8	NADH dehydrogenase (ubiquinone) 1 alpha subcomplex, 8, 19kDa	4702	ENSG00000119421
ILMN_5220377	0.7577	NDUFB1	NADH dehydrogenase (ubiquinone) 1 beta subcomplex, 1, 7kDa	4707	ENSG00000183648
ILMN_5890048	0.6779	NDUFB5	NADH dehydrogenase (ubiquinone) 1 beta subcomplex, 5, 16kDa	4711	ENSG00000136521
ILMN_3170451	0.7301	NEFM	neurofilament, medium polypeptide	4741	ENSG00000104722
ILMN_70136	0.6918	NELL1	NEL-like 1 (chicken)	4745	ENSG00000165973
ILMN_7000735	0.7484	NGEF	neuronal guanine nucleotide exchange factor	25791	ENSG00000066248
ILMN_3780358	0.7168	NGFRAP1	nerve growth factor receptor (TNFRSF16) associated protein 1	27018	ENSG00000166681
ILMN_4060253	-0.7062	NINL	ninein-like	22981	ENSG00000101004
ILMN_1780333	0.7631	NME1	NME/NM23 nucleoside diphosphate kinase 1	4830	ENSG00000239672
ILMN_6020068	0.6619	NRBF2	nuclear receptor binding factor 2	29982	ENSG00000148572
ILMN_5220136	0.6749	NRSN1	neurensin 1	140767	ENSG00000152954
ILMN_6180181	0.7125	NSF	N-ethylmaleimide-sensitive factor	4905	ENSG00000073969
ILMN_7050176	0.6767	NT5DC3	5'-nucleotidase domain containing 3	51559	ENSG00000111696
ILMN_2850128	0.7258	NUDT11	nudix (nucleoside diphosphate linked moiety X)-type motif 11	55190	ENSG00000196368
ILMN_3140369	0.663	NUDT14	nudix (nucleoside diphosphate linked moiety X)-type motif 14	256281	ENSG00000183828
ILMN_3940538	0.6976	NUDT4	nudix (nucleoside diphosphate linked moiety X)-type motif 4	11163	ENSG00000173598
ILMN_5050091	0.7728	OAT	ornithine aminotransferase	4942	ENSG00000065154
ILMN_1090242	0.6826	OLFM1	olfactomedin 1	10439	ENSG00000130558
ILMN_5080142	0.7472	OPA1	optic atrophy 1 (autosomal dominant)	4976	ENSG00000198836
ILMN_3780082	0.6897	PACSIN1	protein kinase C and casein kinase substrate in neurons 1	29993	ENSG00000124507
ILMN_4810181	0.6712	PAK1	p21 protein (Cdc42/Rac)-activated kinase 1	5058	ENSG00000149269
ILMN_5910750	0.7729	PAK3	p21 protein (Cdc42/Rac)-activated kinase 3	5063	ENSG00000077264
ILMN_60056	0.704	PAM	peptidylglycine alpha-amidating monooxygenase	5066	ENSG00000145730
ILMN_3140670	-0.7354	PAX6	paired box 6	5080	ENSG00000007372
ILMN_1240711	-0.6919	PCBP4	poly(rC) binding protein 4	57060	ENSG00000090097
ILMN_3990347	0.6698	PCMT1	protein-L-isoaspartate (D-aspartate) O-methyltransferase	5110	ENSG00000120265
ILMN_2340537	0.7399	PCSK2	proprotein convertase subtilisin/kexin type 2	5126	ENSG00000125851
ILMN_6200072	0.731	PDHB	pyruvate dehydrogenase (lipoamide) beta	5162	ENSG00000168291
ILMN_4540671	0.6781	PET112	PET112 homolog (yeast)	5188	ENSG00000059691
ILMN_5340039	0.7061	PEX11B	peroxisomal biogenesis factor 11 beta	8799	ENSG00000131779
ILMN_5860139	0.6675	PEX19	peroxisomal biogenesis factor 19	5824	ENSG00000162735
ILMN_2640446	0.6674	PFDN1	prefoldin subunit 1	5201	ENSG00000113068
ILMN_6620372	-0.6839	PFKFB4	6-phosphofructo-2-kinase/fructose-2,6-biphosphatase 4	5210	ENSG00000114268
ILMN_4920731	0.7411	PFN2	profilin 2	5217	ENSG00000070087
ILMN_2100092	0.7707	PGM2L1	phosphoglucomutase 2-like 1	283209	ENSG00000165434
ILMN_780601	-0.7529	PHKA2	phosphorylase kinase, alpha 2 (liver)	5256	ENSG00000044446
ILMN_1190181	0.7232	PHYHIPL	phytanoyl-CoA 2-hydroxylase interacting protein-like	84457	ENSG00000165443
ILMN_5220020	0.6674	PIAS2	protein inhibitor of activated STAT, 2	9063	ENSG00000078043
ILMN_1780685	-0.7377	PIDD	p53-induced death domain protein	55367	ENSG00000177595
ILMN_6020050	0.6614	PIGY	phosphatidylinositol glycan anchor biosynthesis, class Y	84992	ENSG00000145337
ILMN_3130750	0.7021	PIP4K2C	phosphatidylinositol-5-phosphate 4-kinase, type II, gamma	79837	ENSG00000166908
ILMN_780041	0.7852	PLK2	polo-like kinase 2	10769	ENSG00000145632
ILMN_5420301	0.6855	PNMA1	paraneoplastic Ma antigen 1	9240	ENSG00000176903
ILMN_670086	0.8216	PNMA2	paraneoplastic Ma antigen 2	10687	ENSG00000240694
ILMN_3290279	-0.7483	POLD1	polymerase (DNA directed), delta 1, catalytic subunit	5424	ENSG00000062822
ILMN_70692	0.664	POLR2K	polymerase (RNA) II (DNA directed) polypeptide K, 7.0kDa	5440	ENSG00000147669
ILMN_5360040	-0.6833	POMT2	protein-O-mannosyltransferase 2	29954	ENSG00000009830
ILMN_1170100	0.7746	POP4	processing of precursor 4, ribonuclease P/MRP subunit (S. cerevisiae)	10775	ENSG00000105171
ILMN_580270	-0.733	POU2F1	POU class 2 homeobox 1	5451	ENSG00000143190
ILMN_6130022	-0.7058	POU2F2	POU class 2 homeobox 2	5452	ENSG00000028277
ILMN_780731	0.7132	PPP1R11	protein phosphatase 1, regulatory (inhibitor) subunit 11	6992	ENSG00000204619
ILMN_6980253	0.6862	PPP1R14C	protein phosphatase 1, regulatory (inhibitor) subunit 14C	81706	ENSG00000198729
ILMN_70066	0.6677	PPP2R2B	protein phosphatase 2, regulatory subunit B, beta	5521	ENSG00000156475
ILMN_4050148	0.6642	PPP2R2C	protein phosphatase 2, regulatory subunit B, gamma	5522	ENSG00000074211
ILMN_50435	0.6932	PPP4R4	protein phosphatase 4, regulatory subunit 4	57718	ENSG00000119698
ILMN_3130520	-0.6893	PRDM2	PR domain containing 2, with ZNF domain	7799	ENSG00000116731
ILMN_4210575	0.6823	PRKAR2B	protein kinase, cAMP-dependent, regulatory, type II, beta	5577	ENSG00000005249
ILMN_6770324	0.745	PRMT3	protein arginine methyltransferase 3	10196	ENSG00000185238
ILMN_130044	-0.7413	PROM2	prominin 2	150696	ENSG00000155066
ILMN_2320484	0.6714	PSMA5	proteasome (prosome, macropain) subunit, alpha type, 5	5686	ENSG00000143106
ILMN_450139	0.6962	PSMG1	proteasome (prosome, macropain) assembly chaperone 1	8624	ENSG00000183527
ILMN_4780156	-0.76	PTBP1	polypyrimidine tract binding protein 1	5725	ENSG00000011304
ILMN_380292	-0.6993	PTDSS2	phosphatidylserine synthase 2	81490	ENSG00000174915
ILMN_4200446	0.8497	PTPRN2	protein tyrosine phosphatase, receptor type, N polypeptide 2	5799	ENSG00000155093
ILMN_6980280	0.722	PTRH2	peptidyl-tRNA hydrolase 2	51651	ENSG00000141378
ILMN_3870402	-0.6748	QTRTD1	queuine tRNA-ribosyltransferase domain containing 1	79691	ENSG00000151576
ILMN_5670092	0.673	RAB1A	RAB1A, member RAS oncogene family	5861	ENSG00000138069
ILMN_3170348	0.7814	RAB22A	RAB22A, member RAS oncogene family	57403	ENSG00000124209
ILMN_1850280	0.6987	RAB5A	RAB5A, member RAS oncogene family	5868	ENSG00000144566
ILMN_7050161	0.6692	RAN	RAN, member RAS oncogene family	5901	ENSG00000132341
ILMN_4150300	-0.6618	RBM38	RNA binding motif protein 38	55544	ENSG00000132819
ILMN_2680487	0.7294	RC3H1	ring finger and CCCH-type domains 1	149041	ENSG00000135870
ILMN_2850541	-0.676	RDH5	retinol dehydrogenase 5 (11-cis/9-cis)	5959	ENSG00000135437
ILMN_7050164	-0.6658	RECQL4	RecQ protein-like 4	9401	NULL
ILMN_2120292	0.7522	REEP1	receptor accessory protein 1	65055	ENSG00000068615
ILMN_7000347	-0.7475	RFX1	regulatory factor X, 1 (influences HLA class II expression)	5989	ENSG00000132005
ILMN_6900066	0.8312	RGS4	regulator of G-protein signaling 4	5999	ENSG00000117152
ILMN_5390181	0.7302	RGS6	regulator of G-protein signaling 6	9628	ENSG00000182732
ILMN_1090041	0.69	RNASEH2B	ribonuclease H2, subunit B	79621	ENSG00000136104
ILMN_1410156	-0.7377	ROR1	receptor tyrosine kinase-like orphan receptor 1	4919	ENSG00000185483
ILMN_2680315	0.6831	RPL26L1	ribosomal protein L26-like 1	51121	ENSG00000037241
ILMN_60364	0.6955	RPP40	ribonuclease P/MRP 40kDa subunit	10799	ENSG00000124787
ILMN_6770563	-0.662	RPS6KA1	ribosomal protein S6 kinase, 90kDa, polypeptide 1	6195	ENSG00000117676
ILMN_840731	-0.6716	RSU1	Ras suppressor protein 1	6251	ENSG00000148484
ILMN_6200301	0.7764	RTN3	reticulon 3	10313	ENSG00000133318
ILMN_2690450	0.6798	RTN4IP1	reticulon 4 interacting protein 1	84816	ENSG00000130347
ILMN_2510441	0.7157	SATB2	SATB homeobox 2	23314	ENSG00000119042
ILMN_6350746	0.6615	SC5DL	sterol-C5-desaturase (ERG3 delta-5-desaturase homolog, S. cerevisiae)-like	6309	ENSG00000109929
ILMN_4560280	0.751	SCG2	secretogranin II	7857	ENSG00000171951
ILMN_510750	0.7234	SCG5	secretogranin V (7B2 protein)	6447	ENSG00000166922
ILMN_2690324	0.6742	SHOC2	soc-2 suppressor of clear homolog (C. elegans)	8036	ENSG00000108061
ILMN_2450093	0.7061	SLBP	stem-loop binding protein	7884	ENSG00000163950
ILMN_6400577	0.679	SLC17A7	solute carrier family 17 (sodium-dependent inorganic phosphate cotransporter), member 7	57030	ENSG00000104888
ILMN_1780750	-0.7279	SLC27A1	solute carrier family 27 (fatty acid transporter), member 1	376497	ENSG00000130304
ILMN_6550047	0.7099	SLC30A3	solute carrier family 30 (zinc transporter), member 3	7781	ENSG00000115194
ILMN_1050056	0.7838	SLC9A6	solute carrier family 9, subfamily A (NHE6, cation proton antiporter 6), member 6	10479	ENSG00000198689
ILMN_110520	0.6918	SLIRP	SRA stem-loop interacting RNA binding protein	81892	ENSG00000119705
ILMN_5700685	-0.7176	SMAD5	SMAD family member 5	4090	ENSG00000113658
ILMN_1450402	-0.6829	SMARCD2	SWI/SNF related, matrix associated, actin dependent regulator of chromatin, subfamily d, member 2	6603	ENSG00000108604
ILMN_6040113	0.7867	SMYD2	SET and MYND domain containing 2	56950	ENSG00000143499
ILMN_4070292	0.713	SNCA	synuclein, alpha (non A4 component of amyloid precursor)	6622	ENSG00000145335
ILMN_6400025	0.6991	SNX10	sorting nexin 10	29887	ENSG00000086300
ILMN_130315	0.6833	SOD1	superoxide dismutase 1, soluble	6647	ENSG00000142168
ILMN_3850324	-0.7118	SORBS3	sorbin and SH3 domain containing 3	10174	ENSG00000120896
ILMN_7100338	0.6961	SRD5A1	steroid-5-alpha-reductase, alpha polypeptide 1 (3-oxo-5 alpha-steroid delta 4-dehydrogenase alpha 1)	6715	ENSG00000145545
ILMN_5340736	-0.6723	SRGAP1	SLIT-ROBO Rho GTPase activating protein 1	57522	ENSG00000196935
ILMN_4120717	0.7359	STAR	steroidogenic acute regulatory protein	6770	ENSG00000147465
ILMN_4670019	0.6707	STAU2	staufen, RNA binding protein, homolog 2 (Drosophila)	27067	ENSG00000040341
ILMN_5550372	0.7186	STK24	serine/threonine kinase 24	8428	ENSG00000102572
ILMN_580075	-0.6701	STK38	serine/threonine kinase 38	11329	ENSG00000112079
ILMN_3450056	0.677	STMN1	stathmin 1	3925	ENSG00000117632
ILMN_6450341	0.6633	STXBP1	syntaxin binding protein 1	6812	ENSG00000136854
ILMN_2510528	-0.678	SUFU	suppressor of fused homolog (Drosophila)	51684	ENSG00000107882
ILMN_1230632	-0.6971	SUV420H1	suppressor of variegation 4-20 homolog 1 (Drosophila)	51111	ENSG00000110066
ILMN_3290292	0.7098	SYNGR3	synaptogyrin 3	9143	ENSG00000127561
ILMN_4480735	-0.6997	SYNJ2BP	synaptojanin 2 binding protein	55333	ENSG00000213463
ILMN_6520609	0.6759	SYP	synaptophysin	6855	ENSG00000102003
ILMN_2340301	0.6841	TAX1BP1	Tax1 (human T-cell leukemia virus type I) binding protein 1	8887	ENSG00000106052
ILMN_5890167	-0.7121	TAZ	tafazzin	6901	ENSG00000102125
ILMN_2900400	-0.6698	TCAP	titin-cap	8557	ENSG00000173991
ILMN_4610154	-0.6687	TGM1	transglutaminase 1 (K polypeptide epidermal type I, protein-glutamine-gamma-glutamyltransferase)	7051	ENSG00000092295
ILMN_4850019	0.7087	THOC7	THO complex 7 homolog (Drosophila)	80145	ENSG00000163634
ILMN_3450685	0.7051	TMEM130	transmembrane protein 130	222865	ENSG00000166448
ILMN_450138	0.6908	TMSB10	thymosin beta 10	9168	ENSG00000034510
ILMN_6100156	0.7037	TOMM20	translocase of outer mitochondrial membrane 20 homolog (yeast)	9804	ENSG00000173726
ILMN_6770575	0.6924	TSPYL5	TSPY-like 5	85453	ENSG00000180543
ILMN_1190129	0.671	TTC1	tetratricopeptide repeat domain 1	7265	ENSG00000113312
ILMN_4670131	0.7123	TUBB4A	tubulin, beta 4A class IVa	10382	ENSG00000104833
ILMN_5360722	0.7527	TUSC2	tumor suppressor candidate 2	11334	ENSG00000114383
ILMN_1980193	0.706	TXN	thioredoxin	7295	ENSG00000136810
ILMN_1690592	0.7559	UBE2N	ubiquitin-conjugating enzyme E2N	7334	ENSG00000177889
ILMN_6040601	0.738	UBE2T	ubiquitin-conjugating enzyme E2T (putative)	29089	ENSG00000077152
ILMN_4760504	0.6648	UBL5	ubiquitin-like 5	59286	ENSG00000198258
ILMN_380735	0.675	UBLCP1	ubiquitin-like domain containing CTD phosphatase 1	134510	ENSG00000164332
ILMN_6980112	0.7717	UCHL1	ubiquitin carboxyl-terminal esterase L1 (ubiquitin thiolesterase)	7345	ENSG00000154277
ILMN_6860014	0.6807	UGP2	UDP-glucose pyrophosphorylase 2	7360	ENSG00000169764
ILMN_5270164	0.6912	UQCR11	ubiquinol-cytochrome c reductase, complex III subunit XI	10975	ENSG00000127540
ILMN_5050064	0.7434	UQCRQ	ubiquinol-cytochrome c reductase, complex III subunit VII, 9.5kDa	27089	ENSG00000164405
ILMN_1850309	-0.6611	VARS2	valyl-tRNA synthetase 2, mitochondrial (putative)	57176	ENSG00000137411
ILMN_5690121	0.7321	VDAC1	voltage-dependent anion channel 1	7416	ENSG00000213585
ILMN_3170332	0.6854	VPS35	vacuolar protein sorting 35 homolog (S. cerevisiae)	55737	ENSG00000069329
ILMN_4850184	0.7446	WASF1	WAS protein family, member 1	8936	ENSG00000112290
ILMN_6040026	0.7254	WASL	Wiskott-Aldrich syndrome-like	8976	ENSG00000106299
ILMN_5570161	-0.6929	WDR6	WD repeat domain 6	11180	ENSG00000178252
ILMN_2060364	-0.6674	WHSC2	Wolf-Hirschhorn syndrome candidate 2	7469	ENSG00000185049
ILMN_3800270	-0.6705	XPNPEP3	X-prolyl aminopeptidase (aminopeptidase P) 3, putative	63929	ENSG00000196236
ILMN_4230452	0.7434	YWHAH	tyrosine 3-monooxygenase/tryptophan 5-monooxygenase activation protein, eta polypeptide	7533	ENSG00000128245
ILMN_4610019	-0.6618	ZBTB20	zinc finger and BTB domain containing 20	26137	ENSG00000181722
ILMN_4780048	-0.6815	ZNF175	zinc finger protein 175	7728	ENSG00000105497
ILMN_3130487	-0.6736	ZNF324	zinc finger protein 324	25799	ENSG00000083812
ILMN_6290605	-0.6694	ZNF417	zinc finger protein 417	147687	ENSG00000173480
ILMN_3170403	-0.6626	ZNF524	zinc finger protein 524	147807	ENSG00000171443
ILMN_4560066	-0.669	ZNF526	zinc finger protein 526	116115	ENSG00000167625
ILMN_1340278	-0.7509	ZNF546	zinc finger protein 546	339327	ENSG00000187187
ILMN_1050040	-0.7688	ZNF577	zinc finger protein 577	84765	ENSG00000161551
ILMN_6110114	-0.7224	ZNF791	zinc finger protein 791	163049	ENSG00000173875
ILMN_630112	-0.6671	ZNF827	zinc finger protein 827	152485	ENSG00000151612
