# Supplementary material for: The Genetic Architecture of Murine Glutathione Transferases
Source: PLoS One. 2016 Feb 1;11(2):e0148230. doi: 10.1371/journal.pone.0148230 (PMC4734686; doi:10.1371/journal.pone.0148230)
Supplement: S14 Table — (XLSX) [file pone.0148230.s020.xlsx]

## Sheet: S14 Table
S14 Table. Top 500 correlates of hippocampal GST network PC1.
Index	Record	Gene ID	Homologene ID	Symbol	Description	Location (Chr: Mb)	Mean Expr	Max LRS	Max LRS Location (Chr: Mb)	Sample r	N Cases	Sample p(r)	Correlation with PC1 in Liver Network
383	1429137_at	69962	32680	Mettl18	RIKEN cDNA 2810422O20 gene	Chr1: 165.926993	8.17535	21.4	Chr1: 163.955812	-0.563861	67	3.25916e-07
394	1453156_s_at	77219	39824	Zadh1	zinc binding alcohol dehydrogenase, domain containing 1	Chr12: 85.656043	8.47706	12.3	Chr1: 169.153242	-0.562228	67	3.6057e-07
300	1416910_at	66148	22740	Dnajd1	DnaJ (Hsp40) homolog, subfamily D, member 1	Chr14: 78.226085	10.5946	10	Chr1: 174.792334	-0.588831	67	6.40901e-08
331	1455074_at	66793	11608	5430404L10Rik	RIKEN cDNA 5430404L10 gene	Chr16: 14.924895	8.99871	12	Chr1: 182.213910	-0.577496	67	1.36733e-07
146	1423254_x_at	407795		Rps27l	ribosomal protein S27-like	Chr9: 66.794639	10.3579	10.7	Chr1: 188.452708	-0.649124	67	6.14287e-10	-0.652428
367	1420919_at	170755	56582	Sgk3	serum/glucocorticoid regulated kinase 3	Chr1: 9.890062	8.65107	14.1	Chr1: 190.994160	-0.568529	67	2.43311e-07
132	1437932_a_at	12737	9620	Cldn1	claudin 1	Chr16: 26.357095	7.39922	11.9	Chr1: 191.629931	-0.656209	67	3.26527e-10
342	1431375_s_at	57342	10077	Parva	parvin, alpha	Chr7: 119.734599	9.21284	14	Chr1: 31.714578	-0.574312	67	1.68173e-07
19	1418331_at	66179	11640	1110031I02Rik	RIKEN cDNA 1110031I02 gene	Chr11: 121.039234	8.93484	11.1	Chr1: 39.578771	-0.734465	67	6.15064e-14
369	1424783_a_at	394430	106933	Ugt1a10	UDP glycosyltransferase 1 family polypeptide A10 A13	Chr1: 90.115323	7.92225	21.9	Chr1: 90.246344	-0.567664	67	2.56957e-07
466	1426910_at	114774	1940	Pawr	PRKC, apoptosis, WT1, regulator	Chr10: 107.851511	5.77208	26.2	Chr10: 106.921182	-0.548316	67	8.31769e-07
257	1420731_a_at	13008	111061	Csrp2	cysteine and glycine-rich protein 2	Chr10: 110.372324	8.19727	13.1	Chr10: 109.905593	-0.605708	67	1.94394e-08
125	1460734_at	12841	20438	Col9a3	procollagen, type IX, alpha 3 (multiple epiphyseal dysplasia)	Chr2: 180.355933	9.37205	11	Chr10: 114.515889	-0.65887	67	2.56238e-10
280	1435989_x_at	16691	55643	Krt8	keratin 8	Chr15: 101.827142	7.05222	11.9	Chr10: 114.515889	-0.597386	67	3.53616e-08
448	1416060_at	66687	11249	Tbc1d15	TBC1 domain family, member 15	Chr10: 114.635561	9.59353	20.7	Chr10: 114.515889	-0.550886	67	7.15096e-07
127	1438968_x_at	20733	7955	Spint2	serine protease inhibitor, Kunitz type 2	Chr7: 30.041446	9.23385	10.6	Chr10: 120.131017	-0.657709	67	2.84914e-10
396	1428136_at	20377	2266	Sfrp1	secreted frizzled-related sequence protein 1	Chr8: 24.559570	8.36937	11.5	Chr10: 120.131017	-0.561953	67	3.66733e-07
440	1451580_a_at	22139	317	Ttr	transthyretin (prealbumin)	Chr18: 20.823933	14.07	8.6	Chr10: 120.809085	-0.5528	67	6.38348e-07	-0.760631
219	1435275_at	333182	16948	Cox6b2	cytochrome c oxidase subunit VIb polypeptide 2	Chr7: 4.703660	7.63893	11.1	Chr10: 14.122491	-0.616322	67	9.02671e-09
428	1416271_at	64058	11098	Perp	p53 apoptosis effector related to Pmp22 (keratinocytes-associated protein 1, epithelial intercellular desmosome junction component)	Chr10: 18.576312	8.1211	14.3	Chr10: 19.098322	-0.555012	67	5.59288e-07
433	1423411_at	245945	36932	BC013481	cDNA sequence BC013481	Chr5: 66.410056	5.0687	11.3	Chr10: 19.098322	-0.55385	67	5.99626e-07
327	1439190_at	329977	77947	Fhad1	forkhead-associated (FHA) phosphopeptide binding domain 1	Chr4: 141.474197	7.00806	9.7	Chr10: 30.430648	-0.577993	67	1.3236e-07
265	1417883_at	14872	37358	Gstt2	glutathione S-transferase, theta 2	Chr10: 75.294800	7.09533	18.8	Chr10: 73.389753	-0.602393	67	2.47303e-08
299	1417725_a_at	56390	4663	Sssca1	Sjogren's syndrome/scleroderma autoantigen 1	Chr19: 5.730338	8.43857	10	Chr11: 56.515095	-0.589338	67	6.19068e-08
348	1427590_at	22698	69102	Zfp39	zinc finger protein 39	Chr11: 58.702369	5.71824	35.5	Chr11: 58.057819	-0.573104	67	1.81781e-07
416	1444186_at	72947	75268	2900006B13Rik	RIKEN cDNA 2900006B13 gene	Chr11: 51.409944	6.75238	22.2	Chr11: 58.057819	0.557752	67	4.74091e-07
358	1452805_at	276852	9928	D11Wsu47e	DNA segment, Chr 11, Wayne State University 47, expressed	Chr11: 113.550303	8.06445	19.9	Chr11: 58.923978	-0.571831	67	1.9725e-07
430	1417596_at	27078	8440	Eppb9	endothelial precursor protein B9	Chr11: 61.321182	8.44283	36.6	Chr11: 62.065414	-0.554783	67	5.67027e-07
204	1424184_at	11370	5	Acadvl	acyl-Coenzyme A dehydrogenase, very long chain	Chr11: 69.823748	10.2023	35.4	Chr11: 69.415410	-0.623453	67	5.19182e-09
207	1455927_x_at	67711	41672	Nsmce1	non-SMC element 1 homolog (S. cerevisiae)	Chr7: 132.611197	8.8104	8.6	Chr11: 73.923768	-0.623371	67	5.2253e-09
492	1437463_x_at	21810	37294	Tgfbi	transforming growth factor, beta induced (granular and lattice corneal dystrophies, Bowman layer dystrophies)	Chr13: 56.740588	6.91622	10.7	Chr11: 82.070985	-0.542666	67	1.15381e-06
277	1456532_at	71785	11875	Pdgfd	platelet-derived growth factor, D polypeptide	Chr9: 6.378308	6.17609	12	Chr11: 87.668081	-0.597986	67	3.38904e-08
2	1452823_at	76263	41075	GSTK1	glutathione S-transferase kappa 1	Chr6: 42.197485	8.76883	11.3	Chr11: 96.386744	-0.80469	67	0	-0.749676
110	1422614_s_at	14533	1140	Bloc1s1	biogenesis of lysosome-related organelles complex-1, subunit 1	Chr10: 128.357058	9.94146	11.6	Chr11: 96.386744	-0.66416	67	1.56871e-10
194	1428812_at	73287	12495	1700040L02Rik	RIKEN cDNA 1700040L02 gene	Chr10: 67.893982	5.99089	13.9	Chr11: 96.386744	-0.629509	67	3.20351e-09
263	1450699_at	20341	2930	Selenbp1	selenium binding protein 1	Chr3: 94.748411	7.43239	17.6	Chr11: 96.386744	-0.603197	67	2.33355e-08
284	1452637_a_at	69168	41103	Bola1	bolA-like 1	Chr3: 96.000941	8.70639	22.1	Chr11: 96.386744	-0.596161	67	3.85512e-08
295	1417103_at	13202	1038	Ddt	D-dopachrome tautomerase	Chr10: 75.234009	10.1346	17.5	Chr11: 96.386744	-0.590773	67	5.60952e-08
339	1452626_a_at	69064	19598	C10orf125	fucose mutarotase	Chr7: 147.286998	9.86145	16.6	Chr11: 96.386744	-0.574968	67	1.61183e-07
375	1418656_at	66373	40833	Lsm5	LSM5 homolog, U6 small nuclear RNA associated (S. cerevisiae)	Chr6: 56.651124	7.90367	12.6	Chr11: 96.386744	-0.565293	67	2.98139e-07
443	1418086_at	68458	12267	Ppp1r14a	protein phosphatase 1, regulatory (inhibitor) subunit 14A	Chr7: 30.074442	8.47169	10.6	Chr11: 96.386744	-0.55204	67	6.67858e-07
447	1419456_at	67880	22964	Dcxr	dicarbonyl L-xylulose reductase	Chr11: 120.586891	8.93421	14.6	Chr11: 96.386744	-0.551375	67	6.94702e-07	-0.59887
453	1416934_at	17772	37279	Mtm1	X-linked myotubular myopathy gene 1	ChrX: 68.567882	6.78551	11.5	Chr12: 106.091062	-0.550215	67	7.43984e-07	0.609856
250	1428094_at	16784	7809	Lamp2	lysosomal membrane glycoprotein 2 (Danon cardiomyopathy)	ChrX: 35.772733	10.5666	11.1	Chr12: 112.426348	-0.607676	67	1.68259e-08	-0.643217
314	1455238_at	245631	51851	Mum1l1	melanoma associated antigen (mutated) 1-like 1	ChrX: 135.772328	6.37047	11.7	Chr12: 112.426348	-0.58316	67	9.40299e-08
151	1454862_at	208177	17100	Phldb2	pleckstrin homology-like domain, family B, member 2	Chr16: 45.746423	6.57615	14.4	Chr12: 114.496726	-0.647741	67	6.93299e-10
420	1440411_at	70892	41578	Ttll7	tubulin tyrosine ligase-like family, member 7	Chr10: 102.011834	4.62966	13.4	Chr12: 114.553844	-0.556636	67	5.0721e-07
182	1438391_x_at	15108	68403	Hadh2	hydroxyacyl-Coenzyme A dehydrogenase type II	ChrX: 148.438827	7.8067	16.6	Chr12: 115.166911	-0.634447	67	2.14126e-09
404	1438647_x_at	26370	55798	Cetn2	centrin 2	ChrX: 70.159085	10.2904	13.5	Chr12: 115.166911	-0.560991	67	3.89075e-07
467	1438312_s_at	16998	7405	Ltbp3	latent transforming growth factor beta binding protein 3	Chr19: 5.758402	9.01526	13.1	Chr12: 115.166911	-0.548117	67	8.41504e-07
485	1418762_at	13136	88791	Cd55	CD55 antigen (decay accelerating factor 1)	Chr1: 132.335780	5.94462	13.5	Chr12: 115.166911	-0.544819	67	1.01937e-06
459	1424026_s_at	215751	16347	BC013529	cDNA sequence BC013529	Chr10: 7.487798	8.66408	12.4	Chr12: 116.788761	-0.549237	67	7.8807e-07
431	1426323_x_at	30954	4692	Siva1	SIVA1, apoptosis-inducing factor	Chr12: 113.886044	9.11913	16.5	Chr12: 118.628399	-0.55421	67	5.86838e-07
103	1431510_s_at	67899	12207	2010110K16Rik	RIKEN cDNA 2010110K16 gene	Chr9: 117.974258	8.21476	14.4	Chr12: 118.957586	-0.665477	67	1.38577e-10
465	1428554_a_at	380773	12825	Skiip	SKI interacting protein	Chr12: 88.784950	10.3833	10.5	Chr12: 118.957586	-0.548351	67	8.30045e-07
256	1452233_at	17250	55459	Abcc1	ATP-binding cassette, sub-family C (CFTR/MRP), member 1	Chr16: 14.474394	8.89281	16.6	Chr12: 26.165833	-0.60583	67	1.92668e-08
48	1430421_a_at	235043	43895	BC010787	cDNA sequence BC010787	Chr9: 21.725568	10.7512	9.8	Chr12: 27.578330	-0.695174	67	6.85896e-12
294	1432513_a_at	75434	49920	1700001C02Rik	RIKEN cDNA 1700001C02 gene	Chr5: 30.784519	5.86667	11.1	Chr12: 27.578330	-0.590784	67	5.60541e-08
119	1448491_at	51798	1069	Ech1	enoyl coenzyme A hydratase 1, peroxisomal	Chr7: 29.615254	10.3094	14	Chr12: 30.398065	-0.660861	67	2.13319e-10
61	1420641_a_at	59010	10921	Sqrdl	sulfide quinone reductase-like	Chr2: 122.633309	8.64514	14.3	Chr12: 31.568402	-0.683697	67	2.30376e-11
120	1439560_x_at	69787	20908	Anxa13	annexin A13	Chr16: 5.008136	7.78807	10.7	Chr12: 31.568402	-0.660634	67	2.17837e-10
150	1448513_a_at	67963	4697	Npc2	Niemann Pick type C2	Chr12: 86.097468	11.2862	11.5	Chr12: 31.568402	-0.647998	67	6.77914e-10
175	1448149_at	12385	1433	Ctnna1	catenin (cadherin associated protein), alpha 1	Chr18: 35.413872	10.5267	14.4	Chr12: 31.568402	-0.637173	67	1.70809e-09
223	1448136_at	18606	4526	Enpp2	ectonucleotide pyrophosphatase/phosphodiesterase 2	Chr15: 54.670909	12.752	10.4	Chr12: 31.568402	-0.615343	67	9.72706e-09
403	1417081_a_at	20973	20987	Syngr2	synaptogyrin 2	Chr11: 117.675274	7.82331	14	Chr12: 31.568402	-0.560992	67	3.89049e-07
456	1416027_at	18570	7880	Pdcd6	programmed cell death 6 (microRNA binding)	Chr13: 74.441132	11.5826	15.6	Chr12: 31.568402	-0.549311	67	7.84638e-07
486	1451117_a_at	71943	38055	Srcasm	Src activating and signaling molecule	Chr11: 90.507382	7.96619	9.7	Chr12: 31.568402	-0.544177	67	1.05782e-06
454	1448319_at	11677	110647	Akr1b3	aldo-keto reductase family 1, member B3 (aldose reductase)	Chr6: 34.254112	10.5328	11.7	Chr12: 35.806046	-0.549967	67	7.54946e-07
480	1458343_x_at	69792	3990	Med6	mediator of RNA polymerase II transcription, subunit 6	Chr12: 82.674611	7.79077	11.2	Chr12: 35.806046	-0.545167	67	9.99017e-07
296	1455972_x_at	15107	55888	Hadhsc	L-3-hydroxyacyl-Coenzyme A dehydrogenase, short chain (familial hyperinsulinemic hypoglycemia)	Chr3: 130.936431	10.8861	14.7	Chr12: 36.311420	-0.590429	67	5.74388e-08	-0.598669
275	1435972_at	12380	7658	Cast	calpastatin	Chr13: 74.830062	6.41834	9.4	Chr12: 55.988945	-0.598209	67	3.33592e-08
337	1460615_at	319638	16281	Nt5c2l1	5'-nucleotidase, cytosolic II-like 1	Chr10: 34.023860	6.51707	16.6	Chr12: 55.988945	-0.575803	67	1.52689e-07
278	1418106_at	15214	22705	Hey2	hairy/enhancer-of-split related with YRPW motif 2	Chr10: 30.552348	5.28204	9.9	Chr12: 57.107314	-0.597919	67	3.40517e-08
415	1418412_at	21987	2468	Tpd52l1	tumor protein D52-like 1	Chr10: 31.052479	9.79556	9.5	Chr12: 57.107314	-0.558168	67	4.62282e-07
409	1421014_a_at	69634	49925	Clybl	citrate lyase beta like	Chr14: 122.778423	8.24219	19.6	Chr12: 60.071016	-0.559535	67	4.25348e-07
395	1451311_a_at	72674	69199	Adipor1	adiponectin receptor 1	Chr1: 136.328448	10.3147	9.8	Chr12: 60.476552	-0.562164	67	3.61998e-07
142	1448162_at	22329	838	Vcam1	vascular cell adhesion molecule 1	Chr3: 115.813116	9.14734	8.3	Chr12: 69.125067	-0.650537	67	5.42393e-10
309	1415917_at	108156	55940	Mthfd1	methylenetetrahydrofolate dehydrogenase (NADP+ dependent), methenyltetrahydrofolate cyclohydrolase, formyltetrahydrofolate synthase	Chr12: 77.415411	10.2012	19.4	Chr12: 77.479298	-0.585269	67	8.16191e-08
62	1418907_at	14067	104	F5	coagulation factor V (proaccelerin, labile factor) (hemorrhagic diathesis and thrombophilia)	Chr1: 166.149831	7.08933	14.7	Chr13: 105.974917	-0.683459	67	2.36084e-11
70	1449269_at	14067	104	F5	coagulation factor V (proaccelerin, labile factor) (hemorrhagic diathesis and thrombophilia)	Chr1: 166.141925	8.09781	13.7	Chr13: 105.974917	-0.679761	67	3.43869e-11
108	1455179_at			1110068J02Rik	RIKEN cDNA 1110068J02 gene	Chr18: 7.348272	5.94877	15.8	Chr13: 105.974917	-0.66461	67	1.50375e-10
114	1433551_at	270097	10855	Kiaa1576	synaptic vesicle amine transport protein 1 homolog-like	Chr8: 116.897398	8.79812	9.9	Chr13: 105.974917	-0.663542	67	1.66214e-10
116	1425644_at	16847	1731	Lepr	leptin receptor	Chr4: 101.485241	5.46635	16.1	Chr13: 105.974917	-0.663102	67	1.73198e-10	0.598761
287	1456009_x_at	21976	2923	Top3b	topoisomerase (DNA) III beta	Chr16: 16.892917	9.83602	11.6	Chr13: 105.974917	-0.594273	67	4.40062e-08
351	1455501_at	353169	59263	Slc2a12	solute carrier family 2 (facilitated glucose transporter), member 12	Chr10: 22.423113	7.33708	13.5	Chr13: 105.974917	-0.572688	67	1.8671e-07
470	1450280_a_at	20132	55977	Rrh	retinal pigment epithelium derived rhodopsin homolog	Chr3: 129.511895	5.99914	14.9	Chr13: 105.974917	-0.547349	67	8.80111e-07
31	1441091_at	74559	23672	Elovl7	ELOVL family member 7, elongation of long chain fatty acids (yeast)	Chr13: 109.076735	5.51935	22.9	Chr13: 109.069838	-0.71356	67	8.49987e-13
462	1434297_at	245269	25286	MGC42105	serine/threonine-protein kinase NIM1 (photoreceptor-associated, serine threonine protein kinase catalytic domain, 5p12)	Chr13: 0.110350	8.81927	14.9	Chr13: 120.203852	-0.5487	67	8.13256e-07
214	1422804_at	20708	22633	Serpinb6b	serine (or cysteine) proteinase inhibitor, clade B, member 6b	Chr13: 33.070411	5.40357	14.6	Chr13: 22.490835	-0.619025	67	7.33355e-09
16	1455439_a_at	16852	7399	Lgals1	lectin, galactose binding, soluble 1	Chr15: 78.760456	9.51669	14	Chr13: 30.769380	-0.738934	67	3.37508e-14
189	1417649_at	12577	58	Cdkn1c	cyclin-dependent kinase inhibitor 1C (P57)	Chr7: 150.644714	8.07672	10.3	Chr13: 30.769380	-0.632219	67	2.57084e-09
241	1449009_at	21822		Tgtp	T-cell specific GTPase	Chr11: 48.800008	8.29528	16.2	Chr13: 30.769380	-0.610982	67	1.35171e-08
345	1448169_at	16668	55448	Krt18	keratin 18	Chr15: 101.861413	8.02731	9.1	Chr13: 30.769380	-0.573589	67	1.762e-07
378	1434150_a_at	70152	86842	Mettl7a	methyltransferase like 7A	Chr15: 100.191761	8.06036	15.4	Chr13: 30.769380	-0.565071	67	3.02292e-07
413	1435820_x_at	12305	68212	Ddr1	discoidin domain receptor family, member 1	Chr17: 35.818542	9.2779	12.6	Chr13: 30.769380	-0.558836	67	4.4386e-07	0.594036
373	1436285_at	244608	40927	4933409I22	hypothetical protein 4933409I22	Chr8: 98.069822	5.16271	9.2	Chr13: 32.735701	-0.565726	67	2.90186e-07
414	1418710_at	12509		Cd59a	CD59a antigen	Chr2: 103.925323	9.19991	25.6	Chr13: 68.711507	-0.558341	67	4.57446e-07	-0.612965
252	1453562_a_at	67824	41388	1110025F24Rik	RIKEN cDNA 1110025F24 gene	Chr16: 4.713792	7.67185	12	Chr14: 101.113740	-0.607447	67	1.71114e-08
446	1428487_s_at	67876	6916	Hspe1	heat shock 10kDa protein 1 (chaperonin 10)	Chr1: 55.129169	8.82279	19.2	Chr14: 11.312992	-0.551388	67	6.94157e-07
407	1426690_a_at	20787	3079	Srebf1	sterol regulatory element binding factor 1	Chr11: 60.013200	9.66992	21.3	Chr14: 116.406006	-0.559549	67	4.24996e-07
152	1448562_at	22271	2524	Upp1	uridine phosphorylase 1	Chr11: 9.034739	7.60597	13	Chr14: 117.296055	-0.647029	67	7.37725e-10
445	1416591_at	19376	12908	Rab34	RAB34, member of RAS oncogene family	Chr11: 78.005090	10.15	16.3	Chr14: 47.679976	-0.551438	67	6.92127e-07
201	1416836_at	65107	8535	Lrp10	low-density lipoprotein receptor-related protein 10	Chr14: 55.088612	10.4238	25.8	Chr14: 52.760253	-0.624651	67	4.72337e-09	0.637964
9	1415897_a_at	56615	10544	Mgst1	microsomal glutathione S-transferase 1	Chr6: 138.104736	9.0769	14.6	Chr14: 59.823959	-0.764378	67	8.88178e-16
84	1429001_at	69656	2717	Pir	pirin	ChrX: 160.767976	6.97553	14.6	Chr14: 59.823959	-0.673727	67	6.26557e-11
91	1419367_at	67460	68178	Decr1	2,4-dienoyl CoA reductase 1, mitochondrial	Chr4: 15.847001	9.17602	13.2	Chr14: 59.823959	-0.671179	67	8.03153e-11
344	1416653_at	20912	5260	Stxbp3a	syntaxin binding protein 3a	Chr3: 108.596458	8.8012	11.3	Chr14: 59.823959	-0.573652	67	1.75489e-07
382	1417962_s_at	14600	134	Ghr	growth hormone receptor	Chr15: 3.267822	8.06726	13.1	Chr14: 59.823959	-0.563904	67	3.25045e-07	-0.699194
393	1434223_at	230751	71010	1810007P19Rik	RIKEN cDNA 1810007P19 gene	Chr4: 125.763870	9.43247	10.3	Chr14: 59.823959	-0.562409	67	3.56553e-07
411	1418372_at	11564	12	Adsl	adenylosuccinate lyase	Chr15: 80.798089	8.1812	12	Chr14: 59.823959	-0.559361	67	4.29895e-07
377	1449409_at	69083	38201	Sult1c2	sulfotransferase family, cytosolic, 1C, member 2	Chr17: 53.969205	6.73153	13.9	Chr14: 61.919388	-0.565134	67	3.0111e-07
347	1419435_at	11761	68165	Aox1	aldehyde oxidase 1	Chr1: 58.161833	8.11669	13	Chr14: 62.388100	-0.57324	67	1.80205e-07
153	1455101_at			9030224M15	clone IMAGE:2647821, mRNA	Chr10: 12.927535	7.187	11.2	Chr14: 65.324728	-0.647008	67	7.39083e-10
392	1454656_at	219140	19482	Spata13	spermatogenesis associated 13	Chr14: 61.382915	8.84925	17.9	Chr14: 65.324728	-0.562475	67	3.55118e-07
211	1428181_at	110826	1503	Etfb	electron transferring flavoprotein, beta polypeptide	Chr7: 50.709886	10.8007	8.2	Chr15: 94.999571	-0.620579	67	6.50074e-09
363	1417083_at	66212	38229	Sec61b	Sec61 beta subunit	Chr4: 47.493068	10.9807	10.8	Chr15: 94.999571	-0.569526	67	2.28436e-07
191	1426715_s_at	52466	41693	Slc46a1	solute carrier family 46 (folate transporter), member 1 (heme carrier protein 1)	Chr11: 78.284885	8.18449	9.7	Chr15: 95.144975	-0.632007	67	2.61554e-09
208	1432494_a_at	76411	12641	1700019E19Rik	RIKEN cDNA 1700019E19	Chr12: 87.502098	9.08486	9.5	Chr16: 12.472870	-0.622629	67	5.53883e-09
121	1450726_at	54447	10310	Asah2	N-acylsphingosine amidohydrolase 2	Chr19: 32.059025	7.07314	13.1	Chr16: 61.403131	-0.660401	67	2.2257e-10
253	1418488_s_at	72388	10772	Ripk4	receptor-interacting serine-threonine kinase 4	Chr16: 97.963628	5.6076	19.3	Chr16: 97.799871	-0.607431	67	1.71315e-08
372	1435290_x_at	14960	7750	H2-Aa	histocompatibility 2, class II antigen A, alpha	Chr17: 34.419738	6.91947	14.2	Chr18: 57.241643	-0.566041	67	2.84527e-07
102	1417772_at	76238	49088	Grhpr	glyoxylate reductase/hydroxypyruvate reductase	Chr4: 45.000160	10.0458	9.9	Chr19: 11.170616	-0.666947	67	1.20557e-10
143	1423691_x_at	16691	55643	Krt8	keratin 8	Chr15: 101.827174	7.22982	11.7	Chr19: 12.699071	-0.650519	67	5.43264e-10
254	1455871_s_at	76281	8749	Tax1bp3	Tax1 (human T-cell leukemia virus type I) binding protein 3	Chr11: 72.995424	8.44772	12.7	Chr19: 15.440658	-0.605978	67	1.90598e-08
318	1436946_s_at	14707	122179	Gng5	guanine nucleotide binding protein (G protein), gamma 5 subunit	Chr3: 146.168303	11.0738	12	Chr19: 15.440658	-0.581182	67	1.07263e-07
80	1423627_at	18104	695	Nqo1	NAD(P)H dehydrogenase, quinone 1	Chr8: 109.912264	7.16931	9.9	Chr19: 16.955950	-0.674995	67	5.53066e-11
124	1439444_x_at	68581	4972	Tmed10p	transmembrane emp24-like trafficking protein 10 (putative pseudo gene in human)	Chr13: 36.082096	8.62737	13.3	Chr19: 16.955950	-0.659113	67	2.50585e-10
170	1439462_x_at	68581	4972	Tmed10p	transmembrane emp24-like trafficking protein 10 (putative pseudo gene in human)	Chr13: 36.082143	8.61031	14.6	Chr19: 16.955950	-0.639446	67	1.41187e-09
237	1419595_a_at	14590	2881	Ggh	gamma-glutamyl hydrolase (conjugase, folylpolygammaglutamyl hydrolase)	Chr4: 19.992985	8.88897	14	Chr19: 16.955950	-0.611679	67	1.28293e-08
436	1428460_at	20965	49348	Syn2	synapsin II (schizophrenia candidate)	Chr6: 115.226134	12.7994	12.6	Chr19: 21.917691	0.553403	67	6.15832e-07
15	1453558_at	75040	19147	4930504H06Rik	RIKEN cDNA 4930504H06 gene	Chr12: 34.079913	6.5896	9.2	Chr19: 22.410451	-0.740607	67	2.68674e-14
34	1451277_at	225791	38387	Zadh2	zinc binding alcohol dehydrogenase, domain containing 2	Chr18: 84.266345	9.64088	14.5	Chr19: 22.410451	-0.709917	67	1.3054e-12
59	1416167_at	53381	4672	Prdx4	peroxiredoxin 4	ChrX: 151.763002	9.95117	12.4	Chr19: 22.410451	-0.684409	67	2.14118e-11
100	1428331_at	70153		2210016F16Rik	RIKEN cDNA 2210016F16 gene	Chr13: 58.483077	9.1266	14.2	Chr19: 22.410451	-0.668481	67	1.04152e-10
198	1425455_a_at	211151	17046	Churc1	Mus musculus, clone MGC:28415 IMAGE:4036565, mRNA, complete cds	Chr12: 77.874281	10.7532	11.2	Chr19: 22.410451	-0.626881	67	3.95604e-09
233	1416635_at	57319	4886	Smpdl3a	sphingomyelin phosphodiesterase, acid-like 3A	Chr10: 57.531087	10.0413	12.1	Chr19: 22.410451	-0.61323	67	1.14161e-08
293	1416430_at	12359	55514	Cat	catalase	Chr2: 103.294210	10.1492	9.8	Chr19: 22.410451	-0.591331	67	5.39782e-08
320	1452734_at	68195	31190	Rnaset2	ribonuclease T2	Chr17: 7.193103	11.3712	12.2	Chr19: 22.410451	-0.580682	67	1.10878e-07
460	1416547_at	66495	37630	Ndufb3	NADH dehydrogenase (ubiquinone) 1 beta subcomplex 3	Chr1: 58.643457	12.0275	16.1	Chr19: 22.410451	-0.549103	67	7.94284e-07
131	1416901_at	67963	4697	Npc2	Niemann Pick type C2	Chr12: 86.097772	10.7481	13.4	Chr19: 22.531308	-0.656298	67	3.23914e-10
136	1450925_a_at	67941	69197	Rps27l	ribosomal protein S27-like	Chr9: 66.794694	10.1624	9.2	Chr19: 22.531308	-0.653909	67	4.01754e-10	-0.652428
139	1435429_x_at	67941	69197	Rps27l	ribosomal protein S27-like	Chr9: 66.794653	10.4461	9.6	Chr19: 22.531308	-0.651582	67	4.94453e-10	-0.652428
197	1443723_at	226025	62287	Trpm3	transient receptor potential cation channel, subfamily M, member 3	Chr19: 22.846589	7.195	24.4	Chr19: 22.531308	-0.627372	67	3.80391e-09
298	1415984_at	11364	3	Acadm	acetyl-Coenzyme A dehydrogenase, medium chain	Chr3: 153.585482	10.2654	10.6	Chr19: 22.531308	-0.590273	67	5.80577e-08
323	1436691_x_at	18477	99789	Prdx1	peroxiredoxin 1	Chr4: 116.371883	12.9222	12.4	Chr19: 22.531308	-0.57919	67	1.22357e-07
330	1416000_a_at	18477	99789	Prdx1	peroxiredoxin 1	Chr4: 116.365537	12.7254	20.9	Chr19: 22.531308	-0.577578	67	1.36006e-07
343	1448873_at	18260	1905	Ocln	occludin (tight junction zona occludens protein)	Chr13: 101.267762	8.06598	13.6	Chr19: 22.531308	-0.574038	67	1.71172e-07
444	1440707_at	240590	10935	Dmrt3	doublesex and mab-3 related transcription factor 3	Chr19: 25.697954	6.47007	11	Chr19: 22.531308	-0.551714	67	6.80889e-07
349	1427282_a_at	14297	47908	Fxn	frataxin	Chr19: 24.336282	8.69427	18.2	Chr19: 24.021291	-0.573024	67	1.82725e-07
484	1450389_s_at	18719	100644	Pip5k1a	phosphatidylinositol-4-phosphate 5-kinase, type 1 alpha	Chr19: 24.369364	9.32188	40.1	Chr19: 24.021291	-0.544819	67	1.01935e-06
491	1419455_at	16155	523	Il10rb	interleukin 10 receptor, beta	Chr16: 91.425406	8.22319	11.4	Chr19: 24.021291	-0.542669	67	1.15361e-06
481	1453303_at	12894	1413	Cpt1a	AK014716 (downstream of carnitine palmitoyltransferase 1a, liver)	Chr19: 3.387396	7.49976	15.2	Chr19: 25.045356	-0.545148	67	1.00016e-06
58	1419551_s_at	53416	22739	Stk39	serine/threonine kinase 39, STE20/SPS1	Chr2: 68.048919	10.0847	12.4	Chr19: 38.910191	-0.684628	67	2.09326e-11
244	1451539_at	66898	23123	Baiap2l1	BAI1-associated protein 2-like 1	Chr5: 145.025447	6.75802	12	Chr19: 38.910191	-0.609914	67	1.46389e-08
398	1423516_a_at	18074	40575	Nid2	nidogen 2	Chr14: 20.629200	6.96705	10.3	Chr19: 38.910191	-0.561293	67	3.8194e-07
195	1424340_at	74665	12581	Lrrc48	leucine rich repeat containing 48	Chr11: 60.202315	7.48204	9.8	Chr19: 46.656999	-0.628719	67	3.41412e-09
301	1417189_at	19188	86889	Psme2	proteasome (prosome, macropain) 28 subunit, beta	Chr14: 56.207082	10.0036	12.7	Chr19: 48.744592	-0.588792	67	6.42603e-08
471	1428962_at	75504	18986	1700013F07Rik	RIKEN cDNA 1700013F07 gene	Chr3: 108.340541	7.35325	11.1	Chr19: 48.744592	-0.547139	67	8.90957e-07
482	1442299_at	94064	9543	Mrp127	39S ribosomal protein L27, mitochondrial	--	7.57566	10.7	Chr19: 48.744592	-0.545104	67	1.00266e-06
92	1433866_x_at	18477	99789	Prdx1	peroxiredoxin 1	Chr4: 116.371931	11.6178	11.2	Chr19: 48.972881	-0.67081	67	8.32348e-11
93	1424763_at	75564	12606	1700027N10Rik	RIKEN cDNA 1700027N10 gene	Chr17: 46.271921	10.3377	10.5	Chr19: 48.972881	-0.670234	67	8.80027e-11
144	1417354_at	81500	32544	1810057E01Rik	RIKEN cDNA 1810057E01 gene	Chr18: 35.426065	9.41726	11.4	Chr19: 48.972881	-0.650289	67	5.54388e-10
167	1454800_at	378462	45667	Morn2	MORN repeat containing 2 (modifier of polycystic kidney disease progression 2)	Chr17: 80.693809	8.54707	10.2	Chr19: 48.972881	-0.639838	67	1.36595e-09
218	1456204_at	66487		Snhg8	small nucleolar RNA host gene (non-protein coding) 8	Chr14: 31.941823	8.22686	10.3	Chr19: 48.972881	-0.617077	67	8.52016e-09
240	1417869_s_at	64138	1022	Ctsz	cathepsin Z	Chr2: 174.253229	8.77178	10.8	Chr19: 48.972881	-0.611031	67	1.3468e-08	0.723272
255	1452609_at	68918	18858	1190005I06Rik	RIKEN cDNA 1190005I06 gene	Chr8: 123.132522	8.27081	13.5	Chr19: 48.972881	-0.605896	67	1.91741e-08
290	1431429_a_at	11861	4194	Arl4	ADP-ribosylation factor-like 4	Chr12: 40.762711	9.1139	14.5	Chr19: 48.972881	-0.592262	67	5.06111e-08
338	1451232_at	12476	20916	Cd151	CD151 antigen	Chr7: 148.656815	8.46107	13.5	Chr19: 48.972881	-0.575225	67	1.58522e-07
357	1460194_at	16922	4530	Phyh	phytanoyl-CoA hydroxylase	Chr2: 4.858839	10.9839	13.6	Chr19: 48.972881	-0.572146	67	1.93305e-07
493	1423424_at	22773	55742	Zic3	zinc finger protein of the cerebellum 3	ChrX: 55.288499	6.66589	8.3	Chr19: 48.972881	-0.542587	67	1.15904e-06
406	1435731_x_at	53381	4672	Prdx4	peroxiredoxin 4	ChrX: 151.758491	7.97099	11.6	Chr19: 53.933992	-0.560391	67	4.03661e-07
172	1460242_at	13136	88791	Cd55	CD55 antigen (decay accelerating factor 1)	Chr1: 132.346094	5.24344	9.1	Chr2: 101.560603	-0.638484	67	1.53074e-09
199	1424235_at	66844	39087	Ormdl2	ORM1-like 2 (S. cerevisiae)	Chr10: 128.255663	9.08113	11.7	Chr2: 101.560603	-0.626548	67	4.06249e-09
107	1448550_at	16803	3055	Lbp	lipopolysaccharide binding protein	Chr2: 158.151979	8.83601	16.2	Chr2: 145.107382	-0.664784	67	1.47934e-10	0.610611
427	1416689_at	22156	7985	Tuft1	tuftelin 1	Chr3: 94.416701	8.01459	18.3	Chr3: 109.232254	-0.555159	67	5.54398e-07
38	1416411_at	14863	121492	Gstm2	glutathione S-transferase, mu 2	Chr3: 107.784716	7.17767	11	Chr3: 120.606857	-0.704319	67	2.48646e-12
371	1449588_at	11304	298	Abca4	ATP-binding cassette, sub-family A member 4 (Stargardt disease, dry macular degeneration, rod photoreceptor-specific retinoid pump)	Chr3: 121.876816	8.08744	21.2	Chr3: 120.606857	-0.566598	67	2.7476e-07
496	1415936_at	29815	31181	Bcar3	breast cancer anti-estrogen resistance 3	Chr3: 122.232538	9.43404	13.6	Chr3: 120.606857	-0.542191	67	1.18561e-06
272	1434399_at	207839	5218	Galnt6	UDP-N-acetyl-alpha-D-galactosamine:polypeptide N-acetylgalactosaminyltransferase 6	Chr15: 100.522487	7.95146	14.5	Chr3: 141.704635	-0.60041	67	2.85181e-08
336	1424123_at	217721	9840	Flvcr2	feline leukemia virus subgroup C cellular receptor family, member 2	Chr12: 87.153968	7.17929	10.2	Chr3: 154.789372	-0.57603	67	1.50454e-07
425	1451536_at	67472	8763	Mtfr1	mitochondrial fission regulator 1	Chr3: 19.120258	6.65083	13.2	Chr3: 19.544553	-0.555831	67	5.32437e-07
55	1418384_at	68117	57144	9430083G14Rik	apolipoprotein O-like (mitochondrial inner membrane protein)	ChrX: 109.464977	7.06124	14.9	Chr4: 11.148380	-0.687132	67	1.61435e-11	-0.625792
47	1423891_at	103140	71569	Gstt3	glutathione S-transferase, theta 3	Chr10: 75.237129	5.50017	9.7	Chr4: 13.563196	-0.695626	67	6.53078e-12	-0.697145
179	1422506_a_at	13014	79	Cstb	cystatin B (Stefin B, progressive myoclonus epilepsy)	Chr10: 77.890223	11.4546	11.1	Chr4: 138.152371	-0.635295	67	1.99649e-09
412	1451302_at	68618	12274	CXorf40b	human chromosome X open reading frame 40B	ChrX: 67.642046	8.72905	10.1	Chr4: 142.772318	-0.558968	67	4.40319e-07
322	1448910_at	111175	69255	Pecr	peroxisomal trans-2-enoyl-CoA reductase	Chr1: 72.305956	8.54952	11.5	Chr4: 153.428155	-0.579492	67	1.19945e-07	-0.712158
464	1449842_at	67706	12177	1810059G22Rik	RIKEN cDNA 1810059G22 gene	Chr19: 8.847279	8.05719	8.5	Chr4: 153.428155	-0.548489	67	8.23404e-07
90	1455451_at	233529	11396	Kctd14	potassium channel tetramerisation domain containing 14	Chr7: 104.607931	5.09329	12.5	Chr4: 154.365177	-0.671886	67	7.499e-11
126	1418986_a_at	22294	40902	Uxt	ubiquitously expressed transcript	ChrX: 74.226147	7.42062	11.6	Chr4: 154.365177	-0.658102	67	2.74875e-10
178	1434628_a_at	52428	12407	Rhpn2	rhophilin, Rho GTPase binding protein 2	Chr7: 36.176946	6.54744	18.4	Chr4: 154.365177	-0.635338	67	1.98936e-09
205	1435058_x_at	20912	5260	Stxbp3a	syntaxin binding protein 3a	Chr3: 108.596125	5.73111	15.5	Chr4: 154.365177	-0.623434	67	5.19955e-09
210	1416634_at	68250	12252	5730536A07Rik	RIKEN cDNA 5730536A07 gene	Chr9: 65.986196	9.26907	14	Chr4: 154.365177	-0.620674	67	6.45309e-09
213	1456590_x_at	11677	110647	Akr1b3	aldo-keto reductase family 1, member B3 (aldose reductase)	Chr6: 34.253985	8.88165	9.5	Chr4: 154.365177	-0.620369	67	6.60787e-09
243	1434037_s_at	18519	20834	Kat2b	K(lysine) acetyltransferase 2B (p300/CREB-binding protein-associated factor)	Chr17: 53.811470	9.61691	12.8	Chr4: 154.365177	-0.610452	67	1.40634e-08	-0.608112
281	1420654_a_at	74185	129	Gbe1	glucan (1,4-alpha-), branching enzyme 1	Chr16: 70.569338	5.6244	18.3	Chr4: 154.365177	-0.597243	67	3.57188e-08	-0.704185
285	1438659_x_at	66098	11920	Chchd6	coiled-coil-helix-coiled-coil-helix domain containing 6	Chr6: 89.333179	10.3194	13.9	Chr4: 154.365177	-0.595619	67	4.0049e-08
308	1434432_at	67338	12116	1700051E09Rik	RIKEN cDNA 1700051E09 gene	Chr11: 82.617386	7.22577	11.8	Chr4: 154.365177	-0.585499	67	8.03588e-08
329	1424104_at	68592	5993	Gcipip	GCIP-interacting protein p29	Chr4: 134.492911	9.24053	20.1	Chr4: 154.365177	-0.577601	67	1.35804e-07
354	1454771_at			Ndufb1	NADH dehydrogenase (ubiquinone) 1 beta subcomplex, 1, 7kDa	Chr12: 103.213871	8.83337	13.4	Chr4: 154.365177	-0.572323	67	1.91126e-07
376	1417133_at	18858	7482	Pmp22	peripheral myelin protein	Chr11: 62.972485	9.59544	12.3	Chr4: 154.365177	-0.565135	67	3.01088e-07
384	1418996_a_at	67636	44219	Lyrm5		Chr6: 145.164559	9.8157	10.6	Chr4: 154.365177	-0.563852	67	3.26101e-07
410	1424497_at	68742	19263	1110032O16Rik	RIKEN cDNA 1110032O16 gene	Chr7: 134.032425	8.28985	10.8	Chr4: 154.365177	-0.559405	67	4.28744e-07
423	1438931_s_at	140742	8697	Sesn1	sestrin 1	Chr10: 41.628012	9.4283	10.4	Chr4: 154.365177	-0.55593	67	5.29281e-07
429	1452256_at	68550	11657	1110002N22Rik	RIKEN cDNA 1110002N22 (hydrolase)	Chr11: 79.950449	7.53065	15.2	Chr4: 154.365177	-0.554891	67	5.63379e-07
451	1452585_at	66230	8519	Mrps28	mitochondrial ribosomal protein S28	Chr3: 8.802203	9.42198	10	Chr4: 154.365177	-0.550404	67	7.35727e-07
452	1455196_s_at	380856		AA987161	probable member of zinc finger cluster	Chr13: 67.690600	7.7129	18	Chr4: 154.365177	-0.550248	67	7.42532e-07
458	1434702_at	77006	11400	Ddrgk1	DDRGK domain-containing protein 1	Chr2: 130.479841	10.2998	17.2	Chr4: 154.365177	-0.549244	67	7.87707e-07
478	1443783_x_at	14960	7750	H2-Aa	histocompatibility 2, class II antigen A, alpha	Chr17: 34.419729	4.48077	11.1	Chr4: 154.365177	-0.545284	67	9.92296e-07
497	1443906_at	13136	88791	Cd55	CD55 antigen (decay accelerating factor 1)	Chr1: 132.343347	5.79179	12.4	Chr4: 154.365177	-0.542051	67	1.19516e-06
227	1434430_s_at	11541	20167	Adora2b	adenosine A2b receptor	Chr11: 62.079532	4.79073	12.5	Chr4: 155.281702	-0.61436	67	1.04812e-08
385	1449047_at	56794	5794	1600020H07Rik	RIKEN cDNA 1600020H07 gene	Chr14: 32.428546	7.98905	9.5	Chr4: 155.281702	-0.563847	67	3.26206e-07
437	1429213_at	76947	43831	Ndufaf6	NADH dehydrogenase (ubiquinone) complex I, assembly factor 6	Chr4: 10.978274	7.82323	12.1	Chr4: 155.281702	-0.553248	67	6.21562e-07
468	1451386_at	233016	573	Blvrb	biliverdin reductase B (flavin reductase (NADPH))	Chr7: 28.244400	8.96151	13.5	Chr4: 155.281702	-0.547754	67	8.59552e-07	-0.662168
353	1444112_at	22724	7605	Zbtb7b	zinc finger and BTB domain containing 7B	Chr3: 89.196150	7.10467	16.3	Chr4: 155.384693	-0.572348	67	1.90827e-07
359	1423410_at	104362	56414	Meig1	meiosis expressed gene 1	Chr2: 3.329115	6.04515	11.7	Chr4: 155.384693	-0.571743	67	1.9836e-07
379	1436390_a_at	229725	9032	Clcc1	chloride channel CLIC-like 1	Chr3: 108.481528	8.12112	13.7	Chr4: 155.384693	-0.564926	67	3.05033e-07
489	1428633_at	28071	45411	Twistnb	TWIST neighbor	Chr12: 34.124858	6.66654	15.6	Chr4: 155.384693	-0.542991	67	1.13248e-06
1	1452277_at	74008	8978	Arsg	arylsulfatase G	Chr11: 109.434058	7.72881	13.3	Chr4: 55.060596	-0.814213	67	0	0.677617
79	1455848_at	102502	68270	Tmprss11a	transmembrane protease, serine 11A, plastin 1 (I-isoform)	Chr5: 86.839483	5.51657	13.4	Chr4: 55.060596	-0.675948	67	5.0338e-11
104	1417453_at	72584	2660	Cul4b	cullin 4B	ChrX: 35.886772	8.62666	13.5	Chr4: 55.060596	-0.665402	67	1.39554e-10
362	1429471_at	73721	13074	1110017D15Rik	RIKEN cDNA 1110017D15 gene	Chr4: 41.454184	7.84	14.9	Chr4: 55.060596	-0.570515	67	2.14533e-07
500	1442409_at	68801	41449	Elovl5	ELOVL family member 5, elongation of long chain fatty acids (yeast)	Chr9: 77.794212	6.06162	17.1	Chr4: 55.060596	0.541532	67	1.23112e-06
46	1434188_at	240638	81055	Slc16a12	solute carrier family 16 (monocarboxylic acid transporters), member 12	Chr19: 34.742934	5.19709	12	Chr4: 56.510055	-0.695626	67	6.53033e-12
57	1423224_at	67978	11729	4432405B04Rik	RIKEN cDNA 4432405B04 gene	Chr5: 125.075690	7.99094	12.2	Chr4: 56.510055	-0.685104	67	1.99296e-11
149	1455746_at	16553	22589	Kif13a	kinesin family member 13A	Chr13: 46.844570	8.48003	14.8	Chr4: 56.510055	-0.648189	67	6.66693e-10
402	1438059_at	75444	87304	Ctxn3	cortexin 3	Chr18: 57.637193	6.90658	14.7	Chr4: 56.510055	-0.561002	67	3.88824e-07
17	1416772_at	12896	77	Cpt2	carnitine palmitoyltransferase 2	Chr4: 107.576757	8.11758	19.2	Chr4: 57.626581	-0.73656	67	4.66294e-14
64	1437165_a_at	18542	1946	Pcolce	procollagen C-proteinase enhancer protein	Chr5: 138.046420	8.74677	12.7	Chr4: 57.626581	-0.682025	67	2.73366e-11
89	1416203_at	11826	68051	Aqp1	aquaporin 1 (red blood cells, kidney, choroid plexus)	Chr6: 55.297962	7.60535	12.4	Chr4: 57.626581	-0.672131	67	7.32261e-11
96	1416695_at	12257	574	Bzrp	benzodiazepine receptor, peripheral (mitochondrial)	Chr15: 83.402629	8.93803	11.3	Chr4: 57.626581	-0.669439	67	9.50062e-11
123	1450759_at	12161	1300	Bmp6	bone morphogenetic protein 6	Chr13: 38.591470	8.20634	8.8	Chr4: 57.626581	-0.659337	67	2.45486e-10
164	1460459_at	74090	9788	Paqr5	progestin and adipoQ receptor family member V	Chr9: 61.804058	7.68233	14.5	Chr4: 57.626581	-0.641202	67	1.2171e-09
297	1449218_at	12869	7277	Cox8b	cytochrome c oxidase, subunit VIIIb	Chr7: 148.086240	7.95041	10.9	Chr4: 57.626581	-0.590339	67	5.77963e-08
374	1434756_at	14366	7325	Fzd4	frizzled 4 (WNT and norrin receptor, retinal angiogenesis, exudative vitreoretinopathy	Chr7: 96.561076	9.07445	10.8	Chr4: 57.626581	-0.565597	67	2.92525e-07
461	1422186_s_at	109754	47921	Cyb5r3	NADH-cytochrome b5 reductase 3 (diaphorase-1, methemoglobinemia)	Chr15: 82.984029	11.5241	11.2	Chr4: 58.386896	-0.54884	67	8.06612e-07	-0.795257
177	1448276_at	64540	2453	Tspan4	tetraspanin 4	Chr7: 148.677933	8.75271	14.8	Chr4: 62.368290	-0.635765	67	1.92017e-09
174	1449383_at	11565	111992	Adssl1	adenylosuccinate synthetase like 1	Chr12: 113.876450	8.69412	15.5	Chr4: 69.760185	-0.638011	67	1.59262e-09
488	1417143_at	14745	1072	Lpar1	lysophosphatidic acid receptor 1 (endothelial differentiation, lysophosphatidic acid G-protein-coupled receptor 2, ventricular zone gene 1)	Chr4: 58.448271	9.31088	13.3	Chr4: 69.760185	-0.543141	67	1.12276e-06
147	1417801_a_at	19024	7486	Ppfibp2	protein tyrosine phosphatase, receptor-type, F interacting protein, binding protein 2	Chr7: 114.887830	8.31693	16.8	Chr4: 88.238303	-0.648566	67	6.45058e-10
390	1450467_at	12217	31161	Bsn	bassoon (presynaptic glutamatergic component)	Chr9: 108.000962	9.19027	9.2	Chr4: 9.390855	0.562725	67	3.49675e-07
8	1418186_at	14871	20235	Gstt1	glutathione S-transferase, theta 1	Chr10: 75.246598	8.94713	11.7	Chr5: 103.696016	-0.765167	67	6.66134e-16	-0.91577
424	1452127_a_at	19249	7909	Ptpn13	protein tyrosine phosphatase, non-receptor type 13	Chr5: 104.026724	7.50242	21.5	Chr5: 103.696016	-0.5559	67	5.30235e-07
248	1422465_a_at	18230	69028	Nxn	nucleoredoxin	Chr11: 76.071547	8.93565	9.8	Chr5: 123.738718	-0.608166	67	1.62279e-08
72	1419573_a_at	16852	7399	Lgals1	lectin, galactose binding, soluble 1	Chr15: 78.758458	9.77849	13	Chr5: 128.264974	-0.678493	67	3.9063e-11
106	1433734_at	243755	69125	Slc13a4	solute carrier family 13 (sodium/sulfate symporters), member 4	Chr6: 35.218236	9.22817	11.1	Chr5: 128.264974	-0.664827	67	1.47334e-10
145	1454159_a_at	16008	499	Igfbp2	insulin-like growth factor binding protein 2, 36kDa (trabecular meshwork)	Chr1: 72.896243	10.2275	9.5	Chr5: 128.264974	-0.649632	67	5.87463e-10
157	1436590_at	244416	11615	Ppp1r3b	protein phosphatase 1, regulatory (inhibitor) subunit 3B	Chr8: 36.450643	6.73183	12.6	Chr5: 128.264974	-0.643671	67	9.85923e-10
192	1435513_at	15560	20242	Htr2c	5-hydroxytryptamine (serotonin) receptor 2C	ChrX: 143.631258	10.2529	9.3	Chr5: 128.264974	-0.630312	67	3.00197e-09
304	1441218_at	74052	14728	ttc21a	tetratricopeptide repeat domain 21A	Chr9: 119.878059	6.29218	9.9	Chr5: 128.264974	-0.588012	67	6.77723e-08
340	1427939_s_at	56309	49312	Mycbp	c-myc binding protein	Chr4: 123.586875	8.74867	10.3	Chr5: 128.264974	-0.574809	67	1.62853e-07
439	1460344_at	229534	10740	Pbxip1	pre-B-cell leukemia transcription factor interacting protein 1	Chr3: 89.254330	9.41607	11.2	Chr5: 128.264974	-0.552885	67	6.35131e-07	0.653577
78	1436657_at	100038570		Prcd	progressive rod-cone degeneration (pineal and retinal photoreceptor associated)	Chr11: 116.518874	7.84689	15.5	Chr5: 130.849059	-0.67643	67	4.79861e-11
81	1427040_at	16543	18404	Mdfic	MyoD family inhibitor domain containing	Chr6: 15.751573	8.07946	10.9	Chr5: 130.849059	-0.674932	67	5.5655e-11
82	1451527_at	76477	8357	Pcolce2	procollagen C-endopeptidase enhancer 2	Chr9: 95.593291	7.75029	10.2	Chr5: 130.849059	-0.674868	67	5.60043e-11
97	1447800_x_at	21452	303	Tcn2	transcobalamin 2	Chr11: 3.817226	10.2333	9.9	Chr5: 130.849059	-0.669413	67	9.52405e-11
154	1418709_at	12865	48051	Cox7a1	cytochrome c oxidase, subunit VIIa 1	Chr7: 30.970117	7.12044	10.4	Chr5: 130.849059	-0.646273	67	7.8779e-10
86	1423261_at	78896	11505	C2orf40	esophageal cancer related gene 4 protein, human chromosome 2 open reading frame 40	Chr1: 43.795403	8.63444	11.5	Chr5: 132.603108	-0.673416	67	6.45899e-11
88	1438200_at	240725	49408	Sulf1	sulfatase 1	Chr1: 12.849859	8.35356	12.3	Chr5: 132.603108	-0.672847	67	6.82854e-11
109	1454866_s_at	209195	43154	Clic6	chloride intracellular channel 6	Chr16: 92.541081	9.0741	11.6	Chr5: 132.603108	-0.664408	67	1.53258e-10
113	1456418_at	100040591	55638	Kcnj13	potassium inwardly-rectifying channel, subfamily J, member 13 (low conductance, epithelial, snowflake vitreoretinal degeneration )	Chr1: 89.282957	9.65679	12.5	Chr5: 132.603108	-0.663576	67	1.65696e-10
129	1460049_s_at	78896	11505	C2orf40	esophageal cancer related gene 4 protein, human chromosome 2 open reading frame 40	Chr1: 43.799238	8.73	12.3	Chr5: 132.603108	-0.657061	67	3.0223e-10
155	1449421_a_at	246133	71688	Kcne2	potassium voltage-gated channel, Isk-related subfamily 2 (cardiac arrhythmia)	Chr16: 92.297782	7.97809	12.5	Chr5: 132.603108	-0.645143	67	8.68691e-10
163	1449340_at	66042	9154	Sostdc1	sclerostin domain containing 1	Chr12: 37.044363	9.28704	12.3	Chr5: 132.603108	-0.641852	67	1.15171e-09
173	1417814_at	18784	716	Pla2g5	phospholipase A2, group V	Chr4: 138.355237	6.33924	16.4	Chr5: 132.603108	-0.63803	67	1.59011e-09
183	1441966_at	226025	62287	Trpm3	transient receptor potential cation channel, subfamily M, member 3	Chr19: 22.807859	7.69176	13.9	Chr5: 132.603108	-0.634329	67	2.16226e-09
190	1450995_at	14275	7322	Folr1	folate receptor 1 (adult)	Chr7: 109.007231	8.72534	11	Chr5: 132.603108	-0.632123	67	2.59098e-09
202	1453159_at	71877	10003	Efhc1	EF-hand domain (C-terminal) containing 1	Chr1: 20.969503	6.55315	13.7	Chr5: 132.603108	-0.62424	67	4.87918e-09
206	1417635_at	20686	7951	Spa17	sperm autoantigenic protein 17	Chr9: 37.415203	6.79861	13.4	Chr5: 132.603108	-0.623391	67	5.21722e-09
217	1428987_at	75465	12601	Dncl2b	dynein, cytoplasmic, light chain 2B	Chr8: 119.038696	8.34143	14	Chr5: 132.603108	-0.618237	67	7.79298e-09
221	1417231_at	12738	9621	Cldn2	claudin 2	ChrX: 136.345329	9.11459	11.2	Chr5: 132.603108	-0.615721	67	9.45087e-09
225	1419608_a_at	12587	4763	Mia1	melanoma inhibitory activity 1	Chr7: 27.964823	8.50755	18.2	Chr5: 132.603108	-0.615297	67	9.76114e-09
228	1429135_at	68800	90132	1110059M19Rik	RIKEN cDNA 1110059M19	ChrX: 42.445406	9.12267	13.1	Chr5: 132.603108	-0.613813	67	1.09245e-08
235	1420624_a_at	22320	37846	Vamp8	vesicle-associated membrane protein 8	Chr6: 72.335365	9.51398	15.2	Chr5: 132.603108	-0.613042	67	1.15799e-08
289	1418440_at	12837	22423	Col8a1	procollagen, type 8, alpha 1	Chr16: 57.627153	8.23741	10.2	Chr5: 132.603108	-0.593614	67	4.60765e-08
391	1429074_at	75556	12605	1700026D08Rik	RIKEN cDNA 1700026D08 gene	Chr7: 90.924418	6.77781	9.6	Chr5: 132.603108	-0.562627	67	3.518e-07
418	1418774_a_at	11977	35	Atp7a	ATPase, Cu++ transporting, alpha polypeptide (Menkes disease)	ChrX: 103.319981	7.01017	13	Chr5: 132.603108	-0.556763	67	5.03331e-07
4	1416441_at	109820	55669	Pgcp	progastricsin (pepsinogen C)	Chr15: 33.426947	8.40219	11.9	Chr5: 133.538653	-0.777179	67	0
5	1416344_at	16784	7809	Lamp2	lysosomal membrane glycoprotein 2	ChrX: 35.758328	9.63275	14.9	Chr5: 133.538653	-0.774756	67	2.22045e-16	-0.643217
6	1438948_x_at	12257	574	Bzrp	benzodiazepine receptor, peripheral	Chr15: 83.404446	6.18112	12	Chr5: 133.538653	-0.767621	67	4.44089e-16
7	1422438_at	13849	94	Ephx1	epoxide hydrolase 1, microsomal	Chr1: 182.919803	9.5759	13.9	Chr5: 133.538653	-0.765315	67	6.66134e-16
11	1429891_at	69460		1700028N11Rik	RIKEN cDNA 1700028M03 gene	Chr15: 9.391515	5.61621	15.5	Chr5: 133.538653	-0.761905	67	1.11022e-15
13	1457825_x_at	21452	303	Tcn2	transcobalamin 2	Chr11: 3.817349	9.2827	15.3	Chr5: 133.538653	-0.747917	67	9.54792e-15
22	1437807_x_at	109748		Catna1	dominant cataract 5	Chr18: 35.414263	9.85694	12.2	Chr5: 133.538653	-0.72974	67	1.14353e-13
24	1417552_at	14089	48282	Fap	fibroblast activation protein, alpha	Chr2: 62.339039	6.37031	12.7	Chr5: 133.538653	-0.723586	67	2.50022e-13
25	1434387_at	106581	12932	Itfg3	integrin alpha FG-GAP repeat containing 3	Chr17: 26.349715	9.27174	17.8	Chr5: 133.538653	-0.722844	67	2.74447e-13
27	1453320_at	76420	18759	1700027A23Rik	RIKEN cDNA 1700027A23 gene	Chr3: 105.799929	6.9293	15.9	Chr5: 133.538653	-0.721746	67	3.14637e-13
28	1416328_a_at	11974	2931	Atp6v0e	ATPase, H+ transporting, V0 subunit	Chr17: 26.836168	10.3776	14.5	Chr5: 133.538653	-0.719099	67	4.35874e-13
33	1434667_at	329941	55879	Col8a2	procollagen, type 8, alpha 2	Chr4: 125.991014	7.45966	13.1	Chr5: 133.538653	-0.710002	67	1.29252e-12
35	1418589_a_at	17349	7839	Mlf1	myeloid leukemia factor 1	Chr3: 67.197889	5.48352	17	Chr5: 133.538653	-0.707497	67	1.7284e-12
39	1427889_at	20740	2353	Spna2	spectrin alpha 2 (neuronal)	Chr2: 29.886223	13.0297	12.3	Chr5: 133.538653	0.703901	67	2.60703e-12
43	1417928_at	30794	2735	Pdlim4	PDZ and LIM domain 4	Chr11: 53.868597	8.2999	17	Chr5: 133.538653	-0.696776	67	5.76073e-12
45	1449041_a_at	22051	37757	Trip6	thyroid hormone receptor interactor 6	Chr5: 137.751133	7.63241	18.8	Chr5: 133.538653	-0.695638	67	6.52234e-12
49	1424713_at	75600	77215	Calml4	calmodulin-like 4	Chr9: 62.719195	8.16758	12.2	Chr5: 133.538653	-0.694541	67	7.3459e-12
54	1420647_a_at	16691	55643	Krt8	keratin 8	Chr15: 101.827174	8.15402	18	Chr5: 133.538653	-0.688324	67	1.42499e-11
63	1416166_a_at	53381	4672	Prdx4	peroxiredoxin 4	ChrX: 151.758491	6.40327	11.2	Chr5: 133.538653	-0.682797	67	2.52631e-11
71	1434423_at	70676	9467	Gulp1	GULP, engulfment adaptor PTB domain containing 1	Chr1: 44.853095	5.62228	11.8	Chr5: 133.538653	-0.67926	67	3.61684e-11
73	1426318_at	282663	113506	Serpinb1b	serine (or cysteine) proteinase inhibitor, clade B, member 1b	Chr13: 33.185667	6.02335	14	Chr5: 133.538653	-0.678255	67	4.00049e-11
76	1438773_at	74051	17682	Steap2	ESTs, Weakly similar to RED_MOUSE Red protein (RER protein) [M.musculus]	Chr5: 5.670130	6.22798	11.8	Chr5: 133.538653	-0.677541	67	4.29625e-11
95	1456012_x_at	68195	31190	Rnaset2	ribonuclease T2	Chr17: 7.202379	10.3103	12.4	Chr5: 133.538653	-0.66944	67	9.4992e-11
115	1437670_x_at	12476	20916	Cd151	CD151 antigen	Chr7: 148.657200	9.77947	18.5	Chr5: 133.538653	-0.663481	67	1.67166e-10
117	1434731_x_at	18477	99789	Prdx1	peroxiredoxin 1	Chr4: 116.371946	12.1705	10.6	Chr5: 133.538653	-0.662658	67	1.80537e-10
134	1424099_at	69590	88454	Gpx8	glutathione peroxidase 8	Chr13: 113.833243	7.94497	11.6	Chr5: 133.538653	-0.655509	67	3.47882e-10
138	1436921_at	11977	35	Atp7a	ATPase, Cu++ transporting, alpha polypeptide (Menkes disease)	ChrX: 103.322703	8.14653	10.6	Chr5: 133.538653	-0.65305	67	4.33839e-10
158	1418697_at	21743	81752	Inmt	indolethylamine N-methyltransferase	Chr6: 55.120739	6.97934	14.9	Chr5: 133.538653	-0.642841	67	1.05851e-09	-0.756054
162	1416318_at	66222	69399	Serpinb1a	serine (or cysteine) proteinase inhibitor, clade B, member 1a	Chr13: 32.934622	7.22104	14.7	Chr5: 133.538653	-0.642121	67	1.12561e-09
180	1445328_at	12829	20071	Col4a4	procollagen, type 4, alpha 4 (glomerulonephropathy, thin basement membrane disease, hematuria)	Chr1: 82.445188	6.47513	13.1	Chr5: 133.538653	-0.6351	67	2.02884e-09
222	1452480_at	228726		BC024760	cDNA sequence BC024760	Chr2: 146.040398	5.75214	18.9	Chr5: 133.538653	-0.615393	67	9.6897e-09
229	1417706_at	27419	222	Naglu	alpha-N-acetylglucosaminidase (Sanfilippo disease IIIB)	Chr11: 100.938389	7.30799	13.6	Chr5: 133.538653	-0.613661	67	1.1051e-08
239	1430781_at	78801	14268	Ak7	adenylate kinase 7	Chr12: 107.020210	8.69939	14.3	Chr5: 133.538653	-0.611389	67	1.31113e-08
245	1436111_at	208613	28471	E030011K20Rik	RIKEN cDNA E030011K20 gene	Chr3: 27.765019	8.47384	14.6	Chr5: 133.538653	-0.609741	67	1.48286e-08
271	1452804_at	75495	16510	1700010A17Rik	RIKEN cDNA 1700010A17 gene	Chr2: 35.908514	6.51782	13.8	Chr5: 133.538653	-0.600567	67	2.81991e-08
283	1416543_at	18024	2412	Nfe2l2	nuclear factor, erythroid derived 2, like 2 (lung damage associated)	Chr2: 75.513676	8.84227	19	Chr5: 133.538653	-0.596469	67	3.77243e-08
307	1429727_at	66859	32642	Slc16a9	solute carrier family 16 (monocarboxylic acid transporters), member 9	Chr10: 69.748170	6.91455	12.1	Chr5: 133.538653	-0.58609	67	7.72152e-08
319	1448200_at	21452	303	Tcn2	transcobalamin 2	Chr11: 3.817375	9.05499	14.9	Chr5: 133.538653	-0.581083	67	1.07971e-07
334	1448556_at	19116	733	Prlr	prolactin receptor	Chr15: 10.258596	7.81825	10.4	Chr5: 133.538653	-0.577188	67	1.3952e-07
335	1441845_at	353025	72278	Caps2	calcyphosphine 2	Chr10: 111.653443	6.14021	13.1	Chr5: 133.538653	-0.576191	67	1.4888e-07
346	1455214_at	17342	4892	Mitf	microphthalmia-associated transcription factor	Chr6: 97.970790	8.41946	14.5	Chr5: 133.538653	-0.57345	67	1.7778e-07
386	1444946_at	73472	17057	Spata18	spermatogenesis associated 18	Chr5: 74.075317	6.20325	12.1	Chr5: 133.538653	-0.563031	67	3.43126e-07
457	1424595_at	16456	14255	F11r	F11 receptor	Chr1: 173.393574	7.91406	13.4	Chr5: 133.538653	-0.549305	67	7.84915e-07
463	1455556_at	18129	7865	Notch2	notch 2	Chr3: 97.953743	9.0806	11.6	Chr5: 133.538653	-0.548609	67	8.17624e-07
469	1424052_at	67026	12075	Thap4	THAP domain containing 4	Chr1: 95.602109	10.2705	10.7	Chr5: 133.538653	-0.54753	67	8.70884e-07
477	1416590_a_at	19376	12908	Rab34	RAB34, member of RAS oncogene family	Chr11: 78.005472	9.33558	15.2	Chr5: 133.538653	-0.545315	67	9.90513e-07
483	1442739_at	240120	120147	BC031441	cDNA sequence BC031441	Chr17: 56.077834	5.62977	14.3	Chr5: 133.538653	-0.545104	67	1.00267e-06
498	1458911_at	381000		Kpl2	ESTs, Moderately similar to KPL2 protein [Rattus norvegicus] [R.norvegicus]	Chr15: 9.513499	6.27575	12.7	Chr5: 133.538653	-0.54181	67	1.21173e-06
32	1434768_at	12751	335	Cln2	tripeptidyl peptidase I	Chr7: 112.893349	9.30651	15.7	Chr5: 136.726447	-0.71168	67	1.0616e-12
105	1456085_x_at	12476	20916	Cd151	CD151 antigen	Chr7: 148.657207	9.94303	14.1	Chr5: 136.726447	-0.665277	67	1.41219e-10
176	1424621_at	57896	9595	Krcc1	lysine-rich coiled-coil 1 (cryptogenic hepatitis binding protein)	Chr6: 71.234742	8.04497	13.8	Chr5: 136.726447	-0.635817	67	1.91197e-09
185	1433488_x_at	75612	1568	Gns	glucosamine (N-acetyl)-6-sulfatase	Chr10: 120.834166	10.0956	13.9	Chr5: 136.726447	-0.633273	67	2.35828e-09
188	1445630_at	78305		1500032F14Rik	RIKEN cDNA 1500032F14 gene	Chr1: 90.340579	6.56587	13.2	Chr5: 136.726447	-0.632275	67	2.55913e-09
216	1438851_x_at	12737	9620	Cldn1	claudin 1	Chr16: 26.356800	5.12434	15.3	Chr5: 136.726447	-0.618471	67	7.65403e-09
258	1460107_at	237988	35390	D030069K18	RIKEN cDNA D030068L24 gene	Chr7: 89.781734	5.06053	14.7	Chr5: 136.726447	-0.604871	67	2.06645e-08
267	1433503_at	77219	39824	Zadh1	zinc binding alcohol dehydrogenase, domain containing 1	Chr12: 85.656263	9.58758	9.6	Chr5: 136.726447	-0.601594	67	2.6196e-08
321	1437835_a_at	68295	9170	0610011L14Rik	RIKEN cDNA 0610011L14 gene	Chr2: 156.393763	6.43294	19.3	Chr5: 136.726447	-0.579971	67	1.16212e-07
324	1416608_a_at	80748	12728	C6orf89	human chromosome 6 open reading frame 89	Chr17: 29.438300	10.311	15.8	Chr5: 136.726447	-0.579021	67	1.2372e-07
332	1455841_s_at	101612	6644	Grwd1	glutamate-rich WD repeat containing 1	Chr7: 53.080623	8.9886	13.2	Chr5: 136.726447	-0.577485	67	1.36835e-07
341	1451745_a_at	70103	4630	Znhit1	zinc finger, HIT domain containing 1	Chr5: 137.458073	11.1649	52.3	Chr5: 136.726447	-0.574672	67	1.64307e-07
350	1435184_at	319900		B430320C24Rik	RIKEN cDNA B430320C24 gene	Chr15: 11.769689	8.68834	12.8	Chr5: 136.726447	-0.572716	67	1.86375e-07
360	1459793_s_at	67636	44219	Ghiso	RIKEN cDNA 4930469P12	Chr6: 145.165927	7.66648	13.7	Chr5: 136.726447	-0.57156	67	2.00691e-07
368	1415916_a_at	108156	55940	Mthfd1	methylenetetrahydrofolate dehydrogenase (NADP+ dependent), methenyltetrahydrofolate cyclohydrolase, formyltetrahydrofolate synthase	Chr12: 77.418648	10.8005	22.2	Chr5: 136.726447	-0.568293	67	2.46966e-07
370	1437133_x_at	11677	110647	Akr1b3	aldo-keto reductase family 1, member B3 (aldose reductase)	Chr6: 34.253987	10.0977	9.2	Chr5: 136.726447	-0.567188	67	2.64777e-07
388	1439722_at	252875	10371	Mios	missing oocyte, meiosis regulator (WD repeat-containing protein mio)	Chr6: 8.168730	8.10717	14.6	Chr5: 136.726447	-0.56278	67	3.48474e-07
400	1435181_at	231506	18212	Lin54	lineage 54	Chr5: 100.871165	7.1909	15.7	Chr5: 136.726447	-0.561145	67	3.85418e-07
449	1424756_at	215114	68463	Hip1	huntingtin interacting protein 1	Chr5: 135.886068	7.54728	18.3	Chr5: 136.726447	0.550724	67	7.21984e-07
472	1443846_x_at	74450	65126	Pank2	pantothenate kinase 2 (Hallervorden-Spatz syndrome)	Chr2: 131.109008	7.75317	12.6	Chr5: 136.726447	0.547128	67	8.91513e-07
474	1428765_at	17263		Meg3	maternally expressed 3 (imprinted, non-coding transcript)	Chr12: 110.796850	12.6137	15.6	Chr5: 136.726447	0.546809	67	9.08241e-07
476	1442047_at	81910	68138	Rreb1	ribosome binding protein 1	Chr13: 38.024047	7.85035	10	Chr5: 136.726447	0.545335	67	9.8939e-07
495	1442542_at	14051	3025	Eya4	eyes absent 4 homolog (Drosophila)	Chr10: 22.822893	6.37972	12.3	Chr5: 136.726447	-0.542222	67	1.18348e-06
499	1426968_a_at	98711	14061	Rdh10	retinol dehydrogenase 10 (all-trans)	Chr1: 16.122074	8.6257	12.1	Chr5: 136.726447	-0.541661	67	1.22206e-06
12	1417430_at	12585	7262	Cdr2	cerebellar degeneration-related 2	Chr7: 128.100663	8.26243	13.2	Chr5: 138.337847	-0.754791	67	3.55271e-15
67	1427938_at	56309	49312	Mycbp	c-myc binding protein	Chr4: 123.587122	7.85331	12.1	Chr5: 138.337847	-0.680853	67	3.07947e-11
98	1437014_x_at	18477	99789	Prdx1	peroxiredoxin 1	Chr4: 116.371931	9.51972	14.3	Chr5: 138.337847	-0.669225	67	9.69755e-11
209	1438656_x_at	21855	4620	Timm17b	translocator of inner mitochondrial membrane 17b	ChrX: 7.483906	9.71394	19.9	Chr5: 138.337847	-0.621079	67	6.25267e-09
286	1439045_x_at	74413	12560	Mtac2d1	membrane targeting (tandem) C2 domain containing 1	Chr12: 102.886913	4.76742	11.6	Chr5: 138.337847	-0.59544	67	4.05559e-08
315	1456792_at	381523		BC022630	clone IMAGE:4206225, mRNA	Chr4: 46.617324	6.69369	17.4	Chr5: 138.337847	-0.582561	67	9.78639e-08
387	1416633_a_at	68250	12252	Fam96a	family with sequence similarity 96, member A	Chr9: 65.986538	9.97676	14.2	Chr5: 138.337847	-0.562828	67	3.47454e-07
389	1456226_x_at	12305	68212	Ddr1	discoidin domain receptor family, member 1	Chr17: 35.818542	10.4211	14.1	Chr5: 138.337847	-0.562726	67	3.49647e-07	0.594036
401	1436223_at	320910	18567	Itgb8	integrin beta 8	Chr12: 120.396581	10.7348	17.2	Chr5: 138.337847	-0.56105	67	3.8767e-07
260	1451139_at	72027	15638	Slc39a4	solute carrier family 39 (zinc transporter), member 4	Chr15: 76.442892	6.79092	11	Chr5: 139.970687	-0.604101	67	2.18546e-08	-0.635307
475	1451132_at	229534	10740	Pbxip1	pre-B-cell leukemia transcription factor interacting protein 1	Chr3: 89.251925	10.4176	11	Chr5: 139.970687	-0.546183	67	9.41925e-07	0.653577
94	1437687_x_at	27055	31434	Fkbp9	FK506 binding protein 9	Chr6: 56.829160	9.93884	12.4	Chr5: 140.893042	-0.669899	67	9.08946e-11
159	1430135_at	13423	68179	Dnas2a	deoxyribonuclease II alpha	Chr8: 87.446275	5.09329	13.3	Chr5: 140.893042	-0.642606	67	1.07997e-09
238	1455812_x_at	246154	36929	Vasn	vasorin	Chr16: 4.650612	6.7823	14.1	Chr5: 140.893042	-0.61144	67	1.30614e-08
262	1429065_at	67454	12138	1200009F10Rik	RIKEN cDNA 1200009F10 gene	Chr10: 90.564768	7.906	13.2	Chr5: 140.893042	-0.603664	67	2.25597e-08
313	1443849_x_at	22275	320	Urod	uroporphyrinogen decarboxylase	Chr4: 116.662877	9.98969	14	Chr5: 140.893042	-0.58324	67	9.35249e-08	-0.608132
355	1456195_x_at	16419	20511	Itgb5	integrin beta 5	Chr16: 33.949109	8.14175	11.1	Chr5: 140.893042	-0.572246	67	1.92077e-07
441	1418445_at	20502	39495	Slc16a2	solute carrier family 16 (monocarboxylic acid transporters), member 2	ChrX: 100.892795	9.13198	12.6	Chr5: 140.893042	-0.55263	67	6.44864e-07
450	1421811_at	21825	31142	Thbs1	thrombospondin 1	Chr2: 117.952275	5.022	9.9	Chr5: 140.893042	-0.550605	67	7.27046e-07
487	1423484_at	83675	12856	Bicc1	bicaudal C homolog 1	Chr10: 70.387856	8.21512	10.2	Chr5: 140.893042	-0.544161	67	1.05881e-06
490	1434499_a_at	16832	55647	Ldhb	lactate dehydrogenase 2, B chain	Chr6: 142.438779	12.7142	15.4	Chr5: 140.893042	-0.542862	67	1.14092e-06
366	1436681_x_at	66055	9360	0610009D07Rik	RIKEN cDNA 0610009D07 gene	Chr12: 4.833705	9.47345	12.1	Chr5: 143.642242	-0.568805	67	2.39115e-07
259	1424940_s_at	217887	17077	BC022687	cDNA sequence BC022687	Chr12: 114.053992	8.73231	9.3	Chr6: 104.791602	-0.604191	67	2.17118e-08
442	1437279_x_at	20969	2252	Sdc1	syndecan 1	Chr12: 8.799706	4.87174	10.2	Chr6: 104.791602	-0.552041	67	6.6783e-07
312	1448489_at	100163	37309	Pafah2	platelet-activating factor acetylhydrolase 2	Chr4: 133.982753	8.52354	10.3	Chr6: 44.145773	-0.583356	67	9.2806e-08
479	1436963_x_at	67706	12177	1810059G22Rik	RIKEN cDNA 1810059G22 gene	Chr19: 8.847067	7.34731	8	Chr7: 136.179208	-0.545204	67	9.96925e-07
242	1421374_a_at	56188	3691	Fxyd1	FXYD domain-containing ion transport regulator 1	Chr7: 31.838044	11.4244	12.7	Chr7: 36.124856	-0.610947	67	1.35521e-08
246	1431805_a_at	52428	12407	Rhpn2	rhophilin, Rho GTPase binding protein 2	Chr7: 36.176701	6.44384	13.9	Chr7: 36.124856	-0.608856	67	1.5421e-08
405	1444290_at	207686	11718	Steap2	Six Transmembrane Epithelial Antigen of Prostate 2	Chr5: 5.664873	5.59469	9.7	Chr7: 56.254112	-0.560639	67	3.97565e-07
40	1456156_at	16847	1731	Lepr	leptin receptor	Chr4: 101.485915	5.15324	11.4	Chr7: 73.078956	-0.69948	67	4.27791e-12	0.598761
75	1428146_s_at	52538	4456	Acaa2	acetyl-Coenzyme A acyltransferase 2 (mitochondrial 3-oxoacyl-Coenzyme A thiolase)	Chr18: 74.963656	9.13521	12.7	Chr7: 73.078956	-0.677595	67	4.27343e-11	-0.659613
83	1430287_s_at	69536	6815	Hemk1	HemK methyltransferase family member 1	Chr9: 107.230079	9.00611	14.4	Chr7: 73.078956	-0.674104	67	6.03764e-11
397	1448363_at	22601	4452	Yap1	yes-associated protein 1	Chr9: 7.932077	9.83503	10.3	Chr7: 73.078956	-0.561928	67	3.67284e-07
10	1456251_x_at	12257	574	Bzrp	benzodiazepine receptor, peripheral	Chr15: 83.404446	6.10851	13.8	Chr7: 73.316123	-0.762464	67	1.11022e-15
23	1444270_at	212892	71779	Rsph4a	radial spoke head protein 4 homolog A	Chr10: 33.635322	5.99143	23.6	Chr7: 73.316123	-0.728659	67	1.3145e-13
29	1427002_s_at	74008	8978	Arsg	arylsulfatase G	Chr11: 109.434164	8.07014	15.3	Chr7: 73.316123	-0.718014	67	4.9738e-13	0.677617
36	1460036_at	108012	2908	Ap1s2	adaptor-related protein complex 1, sigma 2 subunit	ChrX: 160.366924	8.74868	12.9	Chr7: 73.316123	-0.705429	67	2.19114e-12
50	1448123_s_at	21810	37294	Tgfbi	transforming growth factor, beta induced (granular and lattice corneal dystrophies, Bowman layer dystrophies)	Chr13: 56.740240	6.80728	15.9	Chr7: 73.316123	-0.693755	67	7.99694e-12
52	1416321_s_at	116847	2041	Prelp	proline arginine-rich end leucine-rich repeat	Chr1: 135.807212	9.01676	18.4	Chr7: 73.316123	-0.691481	67	1.02034e-11	0.653702
53	1443933_at	74413	12560	Mtac2d1	membrane targeting (tandem) C2 domain containing 1	Chr12: 102.883731	5.31781	13.1	Chr7: 73.316123	-0.690562	67	1.1251e-11
60	1456388_at	50770	75050	Atp11a	ATPase, class VI, type 11A	Chr8: 12.868105	10.3426	17.4	Chr7: 73.316123	-0.684174	67	2.19351e-11
87	1424762_at	235312		C1qtnf5	C1q and tumor necrosis factor related protein 5	Chr9: 43.916666	9.94582	14.2	Chr7: 73.316123	-0.672887	67	6.80205e-11
135	1428636_at	74051	17682	Steap2	six transmembrane epithelial antigen of prostate 2	Chr5: 5.671761	7.36598	12	Chr7: 73.316123	-0.654866	67	3.6866e-10
141	1423523_at	30956	4212	Aass	aminoadipate-semialdehyde synthase	Chr6: 23.022690	6.76781	15.1	Chr7: 73.316123	-0.650761	67	5.31751e-10
165	1437208_at	268301	49723	4921515A04Rik	RIKEN cDNA 4921515A04 gene	Chr10: 58.626985	6.91949	9	Chr7: 73.316123	-0.640098	67	1.33632e-09
215	1456250_x_at	21810	37294	Tgfbi	transforming growth factor, beta induced (granular and lattice corneal dystrophies, Bowman layer dystrophies)	Chr13: 56.740593	6.40909	13.2	Chr7: 73.316123	-0.618788	67	7.46903e-09
247	1450850_at	22350	55740	Ezr	ezrin (villin 2)	Chr17: 6.943114	10.1834	13.1	Chr7: 73.316123	-0.608549	67	1.57758e-08
249	1419261_at	66948	8662	Acad8	acyl-Coenzyme A dehydrogenase family, member 8	Chr9: 26.781950	7.73888	11.5	Chr7: 73.316123	-0.608104	67	1.63029e-08
264	1424025_at	215751	16347	BC013529	cDNA sequence BC013529	Chr10: 7.487774	8.12176	13.1	Chr7: 73.316123	-0.602728	67	2.41401e-08
268	1423613_at	70599	4912	Ssfa2	sperm specific antigen 2	Chr2: 79.512251	10.5629	12.5	Chr7: 73.316123	-0.601218	67	2.69121e-08
279	1452608_at	56309	49312	Mycbp	c-myc binding protein	Chr4: 123.589307	7.51272	18.2	Chr7: 73.316123	-0.597892	67	3.41174e-08
316	1415871_at	21810	37294	Tgfbi	transforming growth factor, beta induced (granular and lattice corneal dystrophies, Bowman layer dystrophies)	Chr13: 56.740150	5.78073	15.9	Chr7: 73.316123	-0.582358	67	9.91969e-08
317	1423955_a_at	76893	39581	Lass2	longevity assurance homolog 2	Chr3: 95.127016	10.0455	15.2	Chr7: 73.316123	-0.581196	67	1.07168e-07
434	1426812_a_at	227737	11269	Fam129b	family with sequence similarity 129, member B	Chr2: 32.780202	9.49049	12.7	Chr7: 73.316123	-0.55362	67	6.07897e-07
3	1451446_at	69538	12976	Antxr1	anthrax toxin receptor 1	Chr6: 87.083882	8.49317	17.5	Chr7: 73.604598	-0.788534	67	0
14	1433750_at	20529	1399	Slc31a1	solute carrier family 31, member 1	Chr4: 62.052210	7.63857	14.4	Chr7: 73.604598	-0.742895	67	1.95399e-14
18	1428663_at	74442	32705	5133401H06Rik	RIKEN cDNA 5133401H06 gene	Chr3: 131.022156	4.98068	18.2	Chr7: 73.604598	-0.735582	67	5.30687e-14
20	1460693_a_at	12841	20438	Col9a3	procollagen, type IX, alpha 3 (multiple epiphyseal dysplasia)	Chr2: 180.356350	6.73931	18.5	Chr7: 73.604598	-0.734207	67	6.37268e-14
21	1455973_at			BB738659	ESTs	Chr11: 8.968788	4.88946	25.3	Chr7: 73.604598	-0.732739	67	7.72715e-14
26	1454736_at	268301	49723	4921515A04Rik	single exon gene with ankrin repeat domain	Chr10: 58.688660	8.89838	16.8	Chr7: 73.604598	-0.722344	67	2.91989e-13
30	1456978_s_at	107174		D19Ertd652e	DNA segment, Chr 19, ERATO Doi 652, expressed	Chr19: 47.812102	5.84251	18.2	Chr7: 73.604598	-0.715945	67	6.39044e-13
42	1417622_at	20496	20283	Slc12a2	solute carrier family 12, member 2	Chr18: 58.105882	10.9492	16.8	Chr7: 73.604598	-0.697249	67	5.46985e-12
44	1435911_s_at	353169	59263	Slc2a12	solute carrier family 2 (facilitated glucose transporter), member 12	Chr10: 22.423192	7.26083	14.4	Chr7: 73.604598	-0.695961	67	6.29674e-12
51	1434503_s_at	16784	7809	Lamp2	lysosomal membrane glycoprotein 2	ChrX: 35.772704	10.1342	13.8	Chr7: 73.604598	-0.693715	67	8.03158e-12	-0.643217
56	1434665_at	11593	13	Aga	aspartylglucosaminidase	Chr8: 54.606490	8.80636	15.6	Chr7: 73.604598	-0.686089	67	1.79943e-11
66	1455627_at	12837	22423	Col8a1	procollagen, type 8, alpha 1	Chr16: 57.624445	5.85374	13	Chr7: 73.604598	-0.68129	67	2.94595e-11
68	1417505_s_at	16158	88705	Il11ra2	interleukin 11 receptor, alpha chain 2	Chr4: 41.714929	9.69579	16.3	Chr7: 73.604598	-0.680843	67	3.08245e-11
74	1436319_at	240725	49408	Sulf1	sulfatase 1	Chr1: 12.850658	6.82186	12.1	Chr7: 73.604598	-0.677635	67	4.25615e-11
77	1421938_at	68607	65196	Serhl	serine hydrolase-like	Chr15: 82.945997	6.30302	19.3	Chr7: 73.604598	-0.677423	67	4.34717e-11	-0.586339
99	1445576_at	75136	18321	4930526H21Rik	RIKEN cDNA 4930526H21 gene	Chr5: 144.744820	6.02476	16.5	Chr7: 73.604598	-0.669062	67	9.85103e-11
101	1434354_at	109731	20251	Maob	monoamine oxidase B (serotonergic, histaminergic neurons, high beta-phenylethylamine affinity, inhibited by deprenyl, Parkinson and depression)	ChrX: 16.286593	9.59146	16.1	Chr7: 73.604598	-0.667119	67	1.18608e-10
112	1454688_x_at	68581	4972	Tmed10p	transmembrane emp24-like trafficking protein 10 (putative pseudo gene in human)	Chr13: 36.082141	8.53969	15	Chr7: 73.604598	-0.663655	67	1.64477e-10
118	1420930_s_at	109748		Catnal1	dominant cataract 5	Chr4: 56.824387	7.52425	10.3	Chr7: 73.604598	-0.661982	67	1.9226e-10
122	1419262_at	66948	8662	Acad8	acyl-Coenzyme A dehydrogenase family, member 8	Chr9: 26.782840	8.8466	16.2	Chr7: 73.604598	-0.659646	67	2.38605e-10
128	1423400_at	16591	68415	Kl	klotho (suppressor of IGF1 and insulin signaling, aging related, hippocampus CA1 expression signature)	Chr5: 151.795471	9.34515	12.2	Chr7: 73.604598	-0.657605	67	2.87634e-10
140	1452583_s_at	319625	71795	Galm	galactose mutarotase	Chr17: 80.584096	5.95985	18.3	Chr7: 73.604598	-0.650785	67	5.306e-10	-0.739544
148	1440312_at	74559	23672	Elovl7	ELOVL family member 7, elongation of long chain fatty acids (yeast)	Chr13: 109.075303	7.78719	19.5	Chr7: 73.604598	-0.648552	67	6.45847e-10
160	1426367_at	69008	69422	Cab39l	calcium binding protein 39-like	Chr14: 60.167156	10.2012	11	Chr7: 73.604598	-0.642419	67	1.09737e-09
169	1429366_at	71827	27419	1700007J06Rik	RIKEN cDNA 1700007J06 gene	Chr3: 30.523305	5.84271	16.6	Chr7: 73.604598	-0.639553	67	1.39912e-09
187	1434866_x_at	12894	1413	Cpt1a	carnitine palmitoyltransferase 1a, liver	Chr19: 3.385539	5.85544	13	Chr7: 73.604598	-0.632775	67	2.45657e-09
193	1457694_at	226265	18691	6430537H07Rik	RIKEN cDNA 6430537H07 gene	Chr19: 59.045409	7.25802	14.7	Chr7: 73.604598	-0.630226	67	3.02304e-09
196	1451405_at	110821	236	Pcca	propionyl-Coenzyme A carboxylase, alpha polypeptide	Chr14: 123.275995	10.1542	9.2	Chr7: 73.604598	-0.62857	67	3.45528e-09	-0.75102
200	1424133_at	103743	9185	Tmem98	transmembrane protein 98	Chr11: 80.635113	9.48753	12.9	Chr7: 73.604598	-0.625683	67	4.35231e-09
203	1457693_a_at	226265	18691	6430537H07Rik	RIKEN cDNA 6430537H07 gene	Chr19: 59.045331	5.60682	22.1	Chr7: 73.604598	-0.623576	67	5.14168e-09
212	1438114_x_at	13644	4284	Efs	embryonal Fyn-associated substrate	Chr14: 55.535483	7.78175	20.7	Chr7: 73.604598	-0.620379	67	6.60264e-09
224	1428705_at	69327	35416	1700007K13Rik	RIKEN cDNA 1700007K13 gene	Chr2: 28.317683	6.98038	13.4	Chr7: 73.604598	-0.615325	67	9.73992e-09
226	1428619_at	66359	11956	2310005N03Rik	RIKEN cDNA 2310005N03 gene	Chr1: 180.251925	10.5439	8.6	Chr7: 73.604598	-0.614575	67	1.03118e-08
230	1453139_at	67993	44188	Nudt12	nudix (nucleoside diphosphate linked moiety X)-type motif 12 (peroxisomal NADH pyrophosphatase, nucleotides and nucleotide ratios)	Chr17: 59.139560	6.85024	13.3	Chr7: 73.604598	-0.613528	67	1.11622e-08
232	1454843_at	110639	56138	Prps2	phosphoribosyl pyrophosphate synthetase 2	ChrX: 163.784484	10.4356	15.8	Chr7: 73.604598	-0.613449	67	1.12291e-08
251	1441102_at	105935		AI987712	expressed sequence AI987712	Chr15: 10.266218	5.99246	16.8	Chr7: 73.604598	-0.60745	67	1.71077e-08
269	1455618_x_at	232670	8213	1300010A20Rik	RIKEN cDNA 1300010A20 gene	Chr6: 29.668212	9.33447	16.2	Chr7: 73.604598	-0.600929	67	2.74755e-08
273	1440354_at	74559	23672	Elovl7	ELOVL family member 7, elongation of long chain fatty acids (yeast)	Chr13: 109.074697	6.37042	27.6	Chr7: 73.604598	-0.599947	67	2.94779e-08
274	1428960_at	71233	17022	4933434I06Rik	RIKEN cDNA 4933434I06 gene	Chr2: 21.102551	6.69263	13.6	Chr7: 73.604598	-0.598221	67	3.33306e-08
282	1455435_s_at	218865	41261	Chdh	choline dehydrogenase	Chr14: 30.853107	7.94358	17	Chr7: 73.604598	-0.597159	67	3.59332e-08
291	1429552_at	71860	12416	1700019F09Rik	RIKEN cDNA 1700019F09 gene	Chr11: 67.738482	6.44075	10.5	Chr7: 73.604598	-0.592013	67	5.14946e-08
292	1443870_at	239273	74563	Abcc4	ATP-binding cassette, sub-family C (CFTR/MRP), member 4	Chr14: 118.881951	7.88077	12.8	Chr7: 73.604598	-0.591812	67	5.22134e-08
302	1437172_x_at	231086	153	Hadhb	hydroxyacyl-Coenzyme A dehydrogenase/3-ketoacyl-Coenzyme A thiolase/enoyl-Coenzyme A hydratase (trifunctional protein), beta subunit	Chr5: 30.510994	10.5882	10.8	Chr7: 73.604598	-0.588654	67	6.4871e-08
305	1436203_a_at	20649	9618	Sntb1	syntrophin, basic 1	Chr15: 55.468260	5.3146	15.9	Chr7: 73.604598	-0.587946	67	6.80791e-08
306	1450044_at	14369	20751	Fzd7	frizzled homolog 7 (Drosophila)	Chr1: 59.543259	7.51118	15.4	Chr7: 73.604598	-0.586146	67	7.69242e-08
310	1454713_s_at	15186	20490	Hdc	histidine decarboxylase (Tourette syndrome)	Chr2: 126.419496	6.00329	17	Chr7: 73.604598	-0.585231	67	8.18253e-08
311	1436831_at	214704	44790	4932408B21Rik	RIKEN cDNA 4932408B21 gene	Chr6: 24.395625	5.25004	10	Chr7: 73.604598	-0.584611	67	8.53128e-08
352	1420485_at	70078	49451	Nol7	nucleolar protein 7	Chr13: 43.497630	7.19459	10.3	Chr7: 73.604598	-0.572553	67	1.8833e-07
365	1433761_at	83679	66961	Pde4dip	phosphodiesterase 4D interacting protein (myomegalin)	Chr3: 97.543043	9.55584	10.4	Chr7: 73.604598	-0.568942	67	2.37048e-07
380	1420280_x_at			Col9a3	procollagen, type IX, alpha 3	Chr2: 180.356544	4.98543	11.2	Chr7: 73.604598	-0.56484	67	3.06678e-07
435	1433847_at	320609	66198	Fam40b	family with sequence similarity 40, member B (homolog of yeast FAR11 protein 2)	Chr6: 29.909088	8.48931	13.8	Chr7: 73.604598	-0.553469	67	6.13408e-07
473	1428485_at	76459	20327	Car12	carbonic anyhydrase 12	Chr9: 66.614092	9.18949	10.7	Chr7: 73.604598	-0.547015	67	8.97426e-07
37	1448415_a_at	20347	20972	Sema3b	sema domain, immunoglobulin domain (Ig), short basic domain, secreted, (semaphorin) 3B	Chr9: 107.500882	6.44306	10.6	Chr7: 75.261559	-0.705142	67	2.26419e-12
41	1435420_at	232156	31125	Slc4a5	solute carrier family 4, sodium bicarbonate cotransporter, member 5	Chr6: 83.254360	7.02845	14.6	Chr7: 75.261559	-0.698146	67	4.95692e-12
69	1450725_s_at	23831	69105	Car14	carbonic anhydrase 14	Chr3: 95.701788	8.95748	15.5	Chr7: 75.261559	-0.680019	67	3.35043e-11
111	1459770_at	216965	27041	Taok1	TAO kinase 1	Chr11: 77.350000	7.43221	13.1	Chr7: 75.261559	-0.663875	67	1.61113e-10
133	1418808_at	19682	2179	Rdh5	retinol dehydrogenase 5 (fundus albipunctatus, stationary night blindness)	Chr10: 128.350943	8.46616	11.8	Chr7: 75.261559	-0.655514	67	3.47715e-10
156	1425926_a_at	18424	11026	Otx2	orthodenticle 2 (bicoid homeodomain transcription factor family member, photoreceptor fate modulator)	Chr14: 49.277897	6.77871	13.8	Chr7: 75.261559	-0.644864	67	8.8986e-10
236	1460250_at	66042	9154	Sostdc1	sclerostin domain containing 1	Chr12: 37.043738	7.60095	10.3	Chr7: 75.261559	-0.612477	67	1.20829e-08
288	1437397_at	105935		AI987712	expressed sequence AI987712	Chr15: 10.262893	8.56322	14.5	Chr7: 75.261559	-0.593673	67	4.58864e-08
328	1419464_at	269633	90112	2810046M22Rik	RIKEN cDNA 2810046M22 gene	Chr5: 24.218220	7.29409	10.9	Chr7: 75.261559	-0.577749	67	1.34487e-07
85	1424938_at	70358	8256	Steap	six transmembrane epithelial antigen of the prostate	Chr5: 5.739937	5.93399	11.3	Chr7: 76.941380	-0.673417	67	6.45874e-11
231	1438021_at	245945	36932	BC013481	cDNA sequence BC013481	Chr5: 66.408387	7.17173	14.4	Chr7: 76.941380	-0.613477	67	1.12056e-08
325	1442359_at	100891		AW045895	expressed sequence AW045895	Chr5: 5.668615	9.13986	24.4	Chr7: 76.941380	-0.578533	67	1.2775e-07
432	1449966_s_at	69008	69422	Cab39l	calcium binding protein 39-like	Chr14: 60.157920	9.37755	12.3	Chr7: 76.941380	-0.553896	67	5.97947e-07
130	1416637_at	20535	100970	Slc4a2	solute carrier family 4 (anion exchanger), member 2	Chr5: 23.945947	9.30553	10.9	Chr7: 77.309843	-0.656755	67	3.10754e-10
266	1434165_at	209195	43154	Clic6	chloride intracellular channel 6	Chr16: 92.540905	10.1784	11	Chr7: 77.309843	-0.601867	67	2.56855e-08
276	1448433_a_at	18542	1946	Pcolce	procollagen C-proteinase enhancer protein	Chr5: 138.046378	7.91239	9.3	Chr7: 77.309843	-0.598146	67	3.35087e-08
494	1451204_at	71145	12556	Scara5	scavenger receptor class A, member 5	Chr14: 66.383078	7.39594	15.3	Chr7: 77.309843	-0.54256	67	1.1608e-06
171	1431302_a_at	67528	41564	Nudt7	nudix (nucleoside diphosphate linked moiety X)-type motif 7	Chr8: 116.675737	7.35258	18.5	Chr8: 113.843238	-0.639366	67	1.42139e-09
455	1448152_at	16002	510	Igf2	insulin-like growth factor 2	Chr7: 149.836882	10.4576	7	Chr8: 26.133138	-0.549581	67	7.72272e-07
361	1438132_at			C030005G22Rik	adult male corpus striatum cDNA, RIKEN full-length enriched library, clone:C030005G22 product:unclassifiable, full insert sequence.	Chr14: 122.764553	8.53724	10.8	Chr8: 83.396537	-0.571226	67	2.05025e-07
184	1455015_at	71310		Tbc1d9	TBC1 domain family, member 9	Chr8: 85.796256	8.93256	13.9	Chr8: 85.707107	-0.634067	67	2.20935e-09
161	1423824_at	68151	11779	Wls	wntless homolog (G protein-coupled receptor 177)	Chr3: 159.597470	8.27678	14.7	Chr9: 46.045436	-0.642246	67	1.11371e-09
438	1424086_at	102644	14334	D9Ucla1	DNA segment, Chr 9, University of California at Los Angeles 1	Chr9: 43.030229	8.51991	33.7	Chr9: 46.336654	-0.553113	67	6.26551e-07
261	1429936_at	72614	12474	2700059L22Rik	RIKEN cDNA 2700059L22 gene	Chr9: 50.429158	5.85327	20.8	Chr9: 48.017409	-0.603986	67	2.20372e-08
381	1450241_a_at	14017	49234	Evi2a	ecotropic viral integration site 2a	Chr11: 79.340426	10.0418	12.1	Chr9: 48.017409	-0.563961	67	3.23895e-07
303	1424753_at	66174	11930	Nudt14	nudix (nucleoside diphosphate linked moiety X)-type motif 14	Chr12: 114.173031	8.66402	8.4	Chr9: 50.175752	-0.588048	67	6.76092e-08
65	1430762_at	235345	52243	4833427G06Rik	RIKEN cDNA 4833427G06 gene	Chr9: 50.889264	5.18513	12.8	Chr9: 50.964757	-0.681706	67	2.82394e-11
408	1423606_at	50706	4730	Postn	periostin, osteoblast specific factor	Chr3: 54.194285	8.20144	17	Chr9: 50.964757	-0.55954	67	4.25218e-07
181	1454757_s_at	52668	84735	Ifi27l1	interferon alpha-inducible protein 27 like 1	Chr12: 104.677613	11.2973	13.8	Chr9: 53.636370	-0.634607	67	2.11328e-09
270	1415760_s_at	11927	2984	Atox1	ATX1 (antioxidant protein 1) homolog 1	Chr11: 55.263981	11.056	10.2	Chr9: 53.636370	-0.600658	67	2.8016e-08	-0.662881
399	1449108_at	14148	31216	Fdx1	ferredoxin 1	Chr9: 51.751657	9.77373	25.8	Chr9: 53.636370	-0.561173	67	3.84759e-07	-0.642794
137	1451201_s_at	107702	2204	Rnh1	ribonuclease/angiogenin inhibitor 1	Chr7: 148.346293	10.2697	11.2	Chr9: 53.767154	-0.653411	67	4.20096e-10
234	1441022_at	23806	111871	Arih1	ariadne ubiquitin-conjugating enzyme E2 binding protein homolog 1	Chr9: 59.236393	7.85476	22.3	Chr9: 54.760049	-0.61322	67	1.1425e-08
426	1438043_at	66867	32399	Hmg20a	high mobility group 20A	Chr9: 56.341588	6.5711	16.7	Chr9: 54.760049	0.555568	67	5.40916e-07
356	1425196_a_at	68917	13072	Hint2	histidine triad nucleotide binding protein 2	Chr4: 43.667172	10.026	7.8	Chr9: 65.312970	-0.57218	67	1.9289e-07
333	1437902_s_at	71660	2167	Rarres2	retinoic acid receptor responder (tazarotene induced) 2 (chemerin)	Chr6: 48.519751	8.78853	10.6	Chr9: 68.739814	-0.577226	67	1.39173e-07
419	1428538_s_at	71660	2167	Rarres2	retinoic acid receptor responder (tazarotene induced) 2 (chemerin)	Chr6: 48.521782	8.12939	10.5	Chr9: 68.739814	-0.556677	67	5.05955e-07
326	1444769_at	21778	32072	Tex9	testis expressed gene 9	Chr9: 72.309341	4.98699	35.3	Chr9: 72.030418	-0.578114	67	1.31317e-07
166	1416368_at	14860	56479	Gsta4	glutathione S-transferase, alpha 4	Chr9: 78.053722	10.9122	65.5	Chr9: 77.247378	-0.63985	67	1.36459e-09	-0.817097
220	1452411_at	214345	44445	Lrrc1	leucine rich repeat containing 1	Chr9: 77.279039	7.60887	44.9	Chr9: 77.247378	-0.615948	67	9.28811e-09
168	1446071_at	74051	17682	Steap2	six transmembrane epithelial antigen of prostate 2	Chr5: 5.670988	5.45802	10.5	Chr9: 79.991491	-0.639756	67	1.37544e-09
421	1418976_s_at	12684	7666	Cideb	cell death-inducing DNA fragmentation factor, alpha subunit-like effector B	Chr14: 56.373083	8.23879	14.6	Chr9: 86.133451	-0.556329	67	5.16682e-07
186	1452330_a_at	74761	11500	Mxra8	matrix-remodelling associated 8	Chr4: 155.217620	9.90193	17.9	Chr9: 86.198703	-0.633177	67	2.37701e-09
417	1418049_at	16998	7405	Ltbp3	latent transforming growth factor beta binding protein 3	Chr19: 5.757947	8.76883	16.5	Chr9: 86.198703	-0.557744	67	4.74325e-07
364	1455083_at	320940	27862	Atp11c	Atpase, class VI, type 11C	ChrX: 57.476745	8.66744	10.6	ChrX: 56.488673	-0.569109	67	2.34553e-07
422	1452603_at	226162	9143	Dpcd	deleted in a mouse model of primary ciliary dyskinesia	Chr19: 45.646462	11.0723	8.4	ChrX: 9.129478	-0.556032	67	5.26041e-07
