# Supplementary material for: The Genetic Architecture of Murine Glutathione Transferases
Source: PLoS One. 2016 Feb 1;11(2):e0148230. doi: 10.1371/journal.pone.0148230 (PMC4734686; doi:10.1371/journal.pone.0148230)
Supplement: S15 Table — (XLSX) [file pone.0148230.s021.xlsx]

## Sheet: S15 Table
S15 Table. Gene enrichment for top 500 genes correlated with Hippocampal GST network PC1
biological process::oxidation-reduction process::GO:0055114
C=828;O=57;E=18.49;R=3.08;rawP=2.49e-14;adjP=3.76e-11
Probe Set	r (hipPC1)	Symbol	Name	Entrez ID	Ensemble Gene ID
1415897_a_at	-0.7644	Mgst1	microsomal glutathione S-transferase 1	56615	ENSMUSG00000008540
1415916_a_at	-0.5683	Mthfd1	methylenetetrahydrofolate dehydrogenase (NADP+ dependent), methenyltetrahydrofolate cyclohydrolase, formyltetrahydrofolate synthase	108156	ENSMUSG00000021048
1415917_at	-0.5853	Mthfd1	methylenetetrahydrofolate dehydrogenase (NADP+ dependent), methenyltetrahydrofolate cyclohydrolase, formyltetrahydrofolate synthase	108156	ENSMUSG00000021048
1415984_at	-0.5903	Acadm	acyl-Coenzyme A dehydrogenase, medium chain	11364	ENSMUSG00000062908
1416000_a_at	-0.5776	Prdx1	peroxiredoxin 1	18477	ENSMUSG00000028691
1416166_a_at	-0.6828	Prdx4	peroxiredoxin 4	53381	ENSMUSG00000025289
1416167_at	-0.6844	Prdx4	peroxiredoxin 4	53381	ENSMUSG00000025289
1416430_at	-0.5913	Cat	catalase	12359	ENSMUSG00000027187
1416547_at	-0.5491	Ndufb3	NADH dehydrogenase (ubiquinone) 1 beta subcomplex 3	66495	ENSMUSG00000026032
1417772_at	-0.6669	Grhpr	glyoxylate reductase/hydroxypyruvate reductase	76238	ENSMUSG00000035637
1418186_at	-0.7652	Gstt1	glutathione S-transferase, theta 1	14871	ENSMUSG00000001663
1418331_at	-0.7345	1110031I02Rik	RIKEN cDNA 1110031I02 gene	66179	ENSMUSG00000025169
1418372_at	-0.5594	Adsl	adenylosuccinate lyase	11564	ENSMUSG00000022407
1418709_at	-0.6463	Cox7a1	cytochrome c oxidase, subunit VIIa 1	12865	ENSMUSG00000074218
1418808_at	-0.6555	Rdh5	retinol dehydrogenase 5	19682	ENSMUSG00000025350
1419261_at	-0.6081	Acad8	acyl-Coenzyme A dehydrogenase family, member 8	66948	ENSMUSG00000031969
1419262_at	-0.6596	Acad8	acyl-Coenzyme A dehydrogenase family, member 8	66948	ENSMUSG00000031969
1419367_at	-0.6712	Decr1	2,4-dienoyl CoA reductase 1, mitochondrial	67460	ENSMUSG00000028223
1419435_at	-0.5732	Aox1	aldehyde oxidase 1	11761	ENSMUSG00000063558
1419456_at	-0.5514	Dcxr	dicarbonyl L-xylulose reductase	67880	ENSMUSG00000039450
1420641_a_at	-0.6837	Sqrdl	sulfide quinone reductase-like (yeast)	59010	ENSMUSG00000005803
1420654_a_at	-0.5972	Gbe1	glucan (1,4-alpha-), branching enzyme 1	74185	ENSMUSG00000022707
1422186_s_at	-0.5488	Cyb5r3	cytochrome b5 reductase 3	109754	ENSMUSG00000018042
1422465_a_at	-0.6082	Nxn	nucleoredoxin	18230	ENSMUSG00000020844
1422614_s_at	-0.6642	Bloc1s1	biogenesis of lysosome-related organelles complex-1, subunit 1	14533	ENSMUSG00000090247
1423400_at	-0.6576	Kl	klotho	16591	ENSMUSG00000058488
1423523_at	-0.6508	Aass	aminoadipate-semialdehyde synthase	30956	ENSMUSG00000029695
1423627_at	-0.675	Nqo1	NAD(P)H dehydrogenase, quinone 1	18104	ENSMUSG00000003849
1424099_at	-0.6555	Gpx8	glutathione peroxidase 8 (putative)	69590	ENSMUSG00000021760
1424184_at	-0.6235	Acadvl	acyl-Coenzyme A dehydrogenase, very long chain	11370	ENSMUSG00000018574
1424938_at	-0.6734	Steap1	six transmembrane epithelial antigen of the prostate 1	70358	ENSMUSG00000015652
1426968_a_at	-0.5417	Rdh10	retinol dehydrogenase 10 (all-trans)	98711	ENSMUSG00000025921
1427282_a_at	-0.573	Fxn	frataxin	14297	ENSMUSG00000059363
1428146_s_at	-0.6776	Acaa2	acetyl-Coenzyme A acyltransferase 2 (mitochondrial 3-oxoacyl-Coenzyme A thiolase)	52538	ENSMUSG00000036880
1428181_at	-0.6206	Etfb	electron transferring flavoprotein, beta polypeptide	110826	ENSMUSG00000004610
1428636_at	-0.6549	Steap2	six transmembrane epithelial antigen of prostate 2	74051	ENSMUSG00000015653
1429001_at	-0.6737	Pir	pirin	69656	ENSMUSG00000031379
1433503_at	-0.6016	Ptgr2	prostaglandin reductase 2	77219	ENSMUSG00000072946
1433551_at	-0.6635	Vat1l	vesicle amine transport protein 1 homolog-like (T. californica)	270097	ENSMUSG00000046844
1433866_x_at	-0.6708	Prdx1	peroxiredoxin 1	18477	ENSMUSG00000028691
1434354_at	-0.6671	Maob	monoamine oxidase B	109731	ENSMUSG00000040147
1434499_a_at	-0.5429	Ldhb	lactate dehydrogenase B	16832	ENSMUSG00000030246
1434731_x_at	-0.6627	Prdx1	peroxiredoxin 1	18477	ENSMUSG00000028691
1434866_x_at	-0.6328	Cpt1a	carnitine palmitoyltransferase 1a, liver	12894	ENSMUSG00000024900
1435275_at	-0.6163	Cox6b2	cytochrome c oxidase subunit VIb polypeptide 2	333182	ENSMUSG00000051811
1435731_x_at	-0.5604	Prdx4	peroxiredoxin 4	53381	ENSMUSG00000025289
1436590_at	-0.6437	Ppp1r3b	protein phosphatase 1, regulatory (inhibitor) subunit 3B	244416	ENSMUSG00000046794
1436691_x_at	-0.5792	Prdx1	peroxiredoxin 1	18477	ENSMUSG00000028691
1437133_x_at	-0.5672	Akr1b3	aldo-keto reductase family 1, member B3 (aldose reductase)	11677	ENSMUSG00000001642
1437172_x_at	-0.5887	Hadhb	hydroxyacyl-Coenzyme A dehydrogenase/3-ketoacyl-Coenzyme A thiolase/enoyl-Coenzyme A hydratase (trifunctional protein), beta subunit	231086	ENSMUSG00000059447
1438391_x_at	-0.6344	Hsd17b10	hydroxysteroid (17-beta) dehydrogenase 10	15108	ENSMUSG00000025260
1438773_at	-0.6775	Steap2	six transmembrane epithelial antigen of prostate 2	74051	ENSMUSG00000015653
1442359_at	-0.5785	Steap2	six transmembrane epithelial antigen of prostate 2	74051	ENSMUSG00000015653
1444290_at	-0.5606	Steap2	six transmembrane epithelial antigen of prostate 2	74051	ENSMUSG00000015653
1446071_at	-0.6398	Steap2	six transmembrane epithelial antigen of prostate 2	74051	ENSMUSG00000015653
1448152_at	-0.5496	Igf2	insulin-like growth factor 2	16002	ENSMUSG00000048583
1448319_at	-0.55	Akr1b3	aldo-keto reductase family 1, member B3 (aldose reductase)	11677	ENSMUSG00000001642
1448910_at	-0.5795	Pecr	peroxisomal trans-2-enoyl-CoA reductase	111175	ENSMUSG00000026189
1449047_at	-0.5638	Hacl1	2-hydroxyacyl-CoA lyase 1	56794	ENSMUSG00000021884
1449108_at	-0.5612	Fdx1	ferredoxin 1	14148	ENSMUSG00000032051
1449218_at	-0.5903	Cox8b	cytochrome c oxidase, subunit VIIIb	12869	ENSMUSG00000025488
1451277_at	-0.7099	Zadh2	zinc binding alcohol dehydrogenase, domain containing 2	225791	ENSMUSG00000049090
1451311_a_at	-0.5622	Adipor1	adiponectin receptor 1	72674	ENSMUSG00000026457
1451386_at	-0.5478	Blvrb	biliverdin reductase B (flavin reductase (NADPH))	233016	ENSMUSG00000040466
1451536_at	-0.5558	Mtfr1	mitochondrial fission regulator 1	67472	ENSMUSG00000027601
1452823_at	-0.8047	Gstk1	glutathione S-transferase kappa 1	76263	ENSMUSG00000029864
1453156_s_at	-0.5622	Ptgr2	prostaglandin reductase 2	77219	ENSMUSG00000072946
1455435_s_at	-0.5972	Chdh	choline dehydrogenase	218865	ENSMUSG00000015970
1455972_x_at	-0.5904	Hadh	hydroxyacyl-Coenzyme A dehydrogenase	15107	ENSMUSG00000027984
1456590_x_at	-0.6204	Akr1b3	aldo-keto reductase family 1, member B3 (aldose reductase)	11677	ENSMUSG00000001642
1460194_at	-0.5721	Phyh	phytanoyl-CoA hydroxylase	16922	ENSMUSG00000026664
biological process::organic acid metabolic process::GO:0006082
C=680;O=40;E=15.19;R=2.63;rawP=2.32e-08;adjP=1.75e-05
Probe Set	r (hipPC1)	Symbol	Name	Entrez ID	Ensemble Gene ID
1419595_a_at	-0.6117	Ggh	gamma-glutamyl hydrolase	14590	ENSMUSG00000073987
1415984_at	-0.5903	Acadm	acyl-Coenzyme A dehydrogenase, medium chain	11364	ENSMUSG00000062908
1437172_x_at	-0.5887	Hadhb	hydroxyacyl-Coenzyme A dehydrogenase/3-ketoacyl-Coenzyme A thiolase/enoyl-Coenzyme A hydratase (trifunctional protein), beta subunit	231086	ENSMUSG00000059447
1417962_s_at	-0.5639	Ghr	growth hormone receptor	14600	ENSMUSG00000055737
1448491_at	-0.6609	Ech1	enoyl coenzyme A hydratase 1, peroxisomal	51798	ENSMUSG00000053898
1416411_at	-0.7043	Gstm2	glutathione S-transferase, mu 2	14863	ENSMUSG00000040562
1416441_at	-0.7772	Pgcp	plasma glutamate carboxypeptidase	54381	ENSMUSG00000039007
1429727_at	-0.5861	Slc16a9	solute carrier family 16 (monocarboxylic acid transporters), member 9	66859	ENSMUSG00000037762
1428146_s_at	-0.6776	Acaa2	acetyl-Coenzyme A acyltransferase 2 (mitochondrial 3-oxoacyl-Coenzyme A thiolase)	52538	ENSMUSG00000036880
1417772_at	-0.6669	Grhpr	glyoxylate reductase/hydroxypyruvate reductase	76238	ENSMUSG00000035637
1433488_x_at	-0.6333	Gns	glucosamine (N-acetyl)-6-sulfatase	75612	ENSMUSG00000034707
1418774_a_at	-0.5568	Atp7a	ATPase, Cu++ transporting, alpha polypeptide	11977	ENSMUSG00000033792
1436921_at	-0.6531	Atp7a	ATPase, Cu++ transporting, alpha polypeptide	11977	ENSMUSG00000033792
1417883_at	-0.6024	Gstt2	glutathione S-transferase, theta 2	14872	ENSMUSG00000033318
1416368_at	-0.6398	Gsta4	glutathione S-transferase, alpha 4	14860	ENSMUSG00000032348
1419262_at	-0.6596	Acad8	acyl-Coenzyme A dehydrogenase family, member 8	66948	ENSMUSG00000031969
1419261_at	-0.6081	Acad8	acyl-Coenzyme A dehydrogenase family, member 8	66948	ENSMUSG00000031969
1434499_a_at	-0.5429	Ldhb	lactate dehydrogenase B	16832	ENSMUSG00000030246
1452823_at	-0.8047	Gstk1	glutathione S-transferase kappa 1	76263	ENSMUSG00000029864
1423523_at	-0.6508	Aass	aminoadipate-semialdehyde synthase	30956	ENSMUSG00000029695
1443849_x_at	-0.5832	Urod	uroporphyrinogen decarboxylase	22275	ENSMUSG00000028684
1416772_at	-0.7366	Cpt2	carnitine palmitoyltransferase 2	12896	ENSMUSG00000028607
1419367_at	-0.6712	Decr1	2,4-dienoyl CoA reductase 1, mitochondrial	67460	ENSMUSG00000028223
1455972_x_at	-0.5904	Hadh	hydroxyacyl-Coenzyme A dehydrogenase	15107	ENSMUSG00000027984
1454713_s_at	-0.5852	Hdc	histidine decarboxylase	15186	ENSMUSG00000027360
1460194_at	-0.5721	Phyh	phytanoyl-CoA hydroxylase	16922	ENSMUSG00000026664
1451311_a_at	-0.5622	Adipor1	adiponectin receptor 1	72674	ENSMUSG00000026457
1448910_at	-0.5795	Pecr	peroxisomal trans-2-enoyl-CoA reductase	111175	ENSMUSG00000026189
1426968_a_at	-0.5417	Rdh10	retinol dehydrogenase 10 (all-trans)	98711	ENSMUSG00000025921
1434866_x_at	-0.6328	Cpt1a	carnitine palmitoyltransferase 1a, liver	12894	ENSMUSG00000024900
1449047_at	-0.5638	Hacl1	2-hydroxyacyl-CoA lyase 1	56794	ENSMUSG00000021884
1440354_at	-0.5999	Elovl7	ELOVL family member 7, elongation of long chain fatty acids (yeast)	74559	ENSMUSG00000021696
1440312_at	-0.6486	Elovl7	ELOVL family member 7, elongation of long chain fatty acids (yeast)	74559	ENSMUSG00000021696
1441091_at	-0.7136	Elovl7	ELOVL family member 7, elongation of long chain fatty acids (yeast)	74559	ENSMUSG00000021696
1448873_at	-0.574	Ocln	occludin	18260	ENSMUSG00000021638
1415917_at	-0.5853	Mthfd1	methylenetetrahydrofolate dehydrogenase (NADP+ dependent), methenyltetrahydrofolate cyclohydrolase, formyltetrahydrofolate synthase	108156	ENSMUSG00000021048
1415916_a_at	-0.5683	Mthfd1	methylenetetrahydrofolate dehydrogenase (NADP+ dependent), methenyltetrahydrofolate cyclohydrolase, formyltetrahydrofolate synthase	108156	ENSMUSG00000021048
1426690_a_at	-0.5595	Srebf1	sterol regulatory element binding transcription factor 1	20787	ENSMUSG00000020538
1424184_at	-0.6235	Acadvl	acyl-Coenzyme A dehydrogenase, very long chain	11370	ENSMUSG00000018574
1436319_at	-0.6776	Sulf1	sulfatase 1	240725	ENSMUSG00000016918
1438200_at	-0.6728	Sulf1	sulfatase 1	240725	ENSMUSG00000016918
1455435_s_at	-0.5972	Chdh	choline dehydrogenase	218865	ENSMUSG00000015970
1415897_a_at	-0.7644	Mgst1	microsomal glutathione S-transferase 1	56615	ENSMUSG00000008540
1450995_at	-0.6321	Folr1	folate receptor 1 (adult)	14275	ENSMUSG00000001827
1423891_at	-0.6956	Gstt3	glutathione S-transferase, theta 3	103140	ENSMUSG00000001665
1418186_at	-0.7652	Gstt1	glutathione S-transferase, theta 1	14871	ENSMUSG00000001663
biological process::oxoacid metabolic process::GO:0043436
C=667;O=39;E=14.89;R=2.62;rawP=4.13e-08;adjP=2.08e-05
Probe Set	r (hipPC1)	Symbol	Name	Entrez ID	Ensemble Gene ID
1418186_at	-0.7652	Gstt1	glutathione S-transferase, theta 1	14871	ENSMUSG00000001663
1423891_at	-0.6956	Gstt3	glutathione S-transferase, theta 3	103140	ENSMUSG00000001665
1450995_at	-0.6321	Folr1	folate receptor 1 (adult)	14275	ENSMUSG00000001827
1415897_a_at	-0.7644	Mgst1	microsomal glutathione S-transferase 1	56615	ENSMUSG00000008540
1455435_s_at	-0.5972	Chdh	choline dehydrogenase	218865	ENSMUSG00000015970
1436319_at	-0.6776	Sulf1	sulfatase 1	240725	ENSMUSG00000016918
1438200_at	-0.6728	Sulf1	sulfatase 1	240725	ENSMUSG00000016918
1424184_at	-0.6235	Acadvl	acyl-Coenzyme A dehydrogenase, very long chain	11370	ENSMUSG00000018574
1426690_a_at	-0.5595	Srebf1	sterol regulatory element binding transcription factor 1	20787	ENSMUSG00000020538
1415917_at	-0.5853	Mthfd1	methylenetetrahydrofolate dehydrogenase (NADP+ dependent), methenyltetrahydrofolate cyclohydrolase, formyltetrahydrofolate synthase	108156	ENSMUSG00000021048
1415916_a_at	-0.5683	Mthfd1	methylenetetrahydrofolate dehydrogenase (NADP+ dependent), methenyltetrahydrofolate cyclohydrolase, formyltetrahydrofolate synthase	108156	ENSMUSG00000021048
1448873_at	-0.574	Ocln	occludin	18260	ENSMUSG00000021638
1440354_at	-0.5999	Elovl7	ELOVL family member 7, elongation of long chain fatty acids (yeast)	74559	ENSMUSG00000021696
1440312_at	-0.6486	Elovl7	ELOVL family member 7, elongation of long chain fatty acids (yeast)	74559	ENSMUSG00000021696
1441091_at	-0.7136	Elovl7	ELOVL family member 7, elongation of long chain fatty acids (yeast)	74559	ENSMUSG00000021696
1449047_at	-0.5638	Hacl1	2-hydroxyacyl-CoA lyase 1	56794	ENSMUSG00000021884
1434866_x_at	-0.6328	Cpt1a	carnitine palmitoyltransferase 1a, liver	12894	ENSMUSG00000024900
1426968_a_at	-0.5417	Rdh10	retinol dehydrogenase 10 (all-trans)	98711	ENSMUSG00000025921
1448910_at	-0.5795	Pecr	peroxisomal trans-2-enoyl-CoA reductase	111175	ENSMUSG00000026189
1451311_a_at	-0.5622	Adipor1	adiponectin receptor 1	72674	ENSMUSG00000026457
1460194_at	-0.5721	Phyh	phytanoyl-CoA hydroxylase	16922	ENSMUSG00000026664
1454713_s_at	-0.5852	Hdc	histidine decarboxylase	15186	ENSMUSG00000027360
1455972_x_at	-0.5904	Hadh	hydroxyacyl-Coenzyme A dehydrogenase	15107	ENSMUSG00000027984
1419367_at	-0.6712	Decr1	2,4-dienoyl CoA reductase 1, mitochondrial	67460	ENSMUSG00000028223
1416772_at	-0.7366	Cpt2	carnitine palmitoyltransferase 2	12896	ENSMUSG00000028607
1443849_x_at	-0.5832	Urod	uroporphyrinogen decarboxylase	22275	ENSMUSG00000028684
1423523_at	-0.6508	Aass	aminoadipate-semialdehyde synthase	30956	ENSMUSG00000029695
1452823_at	-0.8047	Gstk1	glutathione S-transferase kappa 1	76263	ENSMUSG00000029864
1434499_a_at	-0.5429	Ldhb	lactate dehydrogenase B	16832	ENSMUSG00000030246
1419262_at	-0.6596	Acad8	acyl-Coenzyme A dehydrogenase family, member 8	66948	ENSMUSG00000031969
1419261_at	-0.6081	Acad8	acyl-Coenzyme A dehydrogenase family, member 8	66948	ENSMUSG00000031969
1416368_at	-0.6398	Gsta4	glutathione S-transferase, alpha 4	14860	ENSMUSG00000032348
1417883_at	-0.6024	Gstt2	glutathione S-transferase, theta 2	14872	ENSMUSG00000033318
1418774_a_at	-0.5568	Atp7a	ATPase, Cu++ transporting, alpha polypeptide	11977	ENSMUSG00000033792
1436921_at	-0.6531	Atp7a	ATPase, Cu++ transporting, alpha polypeptide	11977	ENSMUSG00000033792
1433488_x_at	-0.6333	Gns	glucosamine (N-acetyl)-6-sulfatase	75612	ENSMUSG00000034707
1417772_at	-0.6669	Grhpr	glyoxylate reductase/hydroxypyruvate reductase	76238	ENSMUSG00000035637
1428146_s_at	-0.6776	Acaa2	acetyl-Coenzyme A acyltransferase 2 (mitochondrial 3-oxoacyl-Coenzyme A thiolase)	52538	ENSMUSG00000036880
1416441_at	-0.7772	Pgcp	plasma glutamate carboxypeptidase	54381	ENSMUSG00000039007
1416411_at	-0.7043	Gstm2	glutathione S-transferase, mu 2	14863	ENSMUSG00000040562
1448491_at	-0.6609	Ech1	enoyl coenzyme A hydratase 1, peroxisomal	51798	ENSMUSG00000053898
1417962_s_at	-0.5639	Ghr	growth hormone receptor	14600	ENSMUSG00000055737
1437172_x_at	-0.5887	Hadhb	hydroxyacyl-Coenzyme A dehydrogenase/3-ketoacyl-Coenzyme A thiolase/enoyl-Coenzyme A hydratase (trifunctional protein), beta subunit	231086	ENSMUSG00000059447
1415984_at	-0.5903	Acadm	acyl-Coenzyme A dehydrogenase, medium chain	11364	ENSMUSG00000062908
1419595_a_at	-0.6117	Ggh	gamma-glutamyl hydrolase	14590	ENSMUSG00000073987
biological process::carboxylic acid metabolic process::GO:0019752
C=630;O=37;E=14.07;R=2.63;rawP=8.41e-08;adjP=3.17e-05
Probe Set	r (hipPC1)	Symbol	Name	Entrez ID	Ensemble Gene ID
1419595_a_at	-0.6117	Ggh	gamma-glutamyl hydrolase	14590	ENSMUSG00000073987
1415984_at	-0.5903	Acadm	acyl-Coenzyme A dehydrogenase, medium chain	11364	ENSMUSG00000062908
1437172_x_at	-0.5887	Hadhb	hydroxyacyl-Coenzyme A dehydrogenase/3-ketoacyl-Coenzyme A thiolase/enoyl-Coenzyme A hydratase (trifunctional protein), beta subunit	231086	ENSMUSG00000059447
1417962_s_at	-0.5639	Ghr	growth hormone receptor	14600	ENSMUSG00000055737
1448491_at	-0.6609	Ech1	enoyl coenzyme A hydratase 1, peroxisomal	51798	ENSMUSG00000053898
1416411_at	-0.7043	Gstm2	glutathione S-transferase, mu 2	14863	ENSMUSG00000040562
1416441_at	-0.7772	Pgcp	plasma glutamate carboxypeptidase	54381	ENSMUSG00000039007
1428146_s_at	-0.6776	Acaa2	acetyl-Coenzyme A acyltransferase 2 (mitochondrial 3-oxoacyl-Coenzyme A thiolase)	52538	ENSMUSG00000036880
1417772_at	-0.6669	Grhpr	glyoxylate reductase/hydroxypyruvate reductase	76238	ENSMUSG00000035637
1418774_a_at	-0.5568	Atp7a	ATPase, Cu++ transporting, alpha polypeptide	11977	ENSMUSG00000033792
1436921_at	-0.6531	Atp7a	ATPase, Cu++ transporting, alpha polypeptide	11977	ENSMUSG00000033792
1417883_at	-0.6024	Gstt2	glutathione S-transferase, theta 2	14872	ENSMUSG00000033318
1416368_at	-0.6398	Gsta4	glutathione S-transferase, alpha 4	14860	ENSMUSG00000032348
1419262_at	-0.6596	Acad8	acyl-Coenzyme A dehydrogenase family, member 8	66948	ENSMUSG00000031969
1419261_at	-0.6081	Acad8	acyl-Coenzyme A dehydrogenase family, member 8	66948	ENSMUSG00000031969
1434499_a_at	-0.5429	Ldhb	lactate dehydrogenase B	16832	ENSMUSG00000030246
1452823_at	-0.8047	Gstk1	glutathione S-transferase kappa 1	76263	ENSMUSG00000029864
1423523_at	-0.6508	Aass	aminoadipate-semialdehyde synthase	30956	ENSMUSG00000029695
1443849_x_at	-0.5832	Urod	uroporphyrinogen decarboxylase	22275	ENSMUSG00000028684
1416772_at	-0.7366	Cpt2	carnitine palmitoyltransferase 2	12896	ENSMUSG00000028607
1419367_at	-0.6712	Decr1	2,4-dienoyl CoA reductase 1, mitochondrial	67460	ENSMUSG00000028223
1455972_x_at	-0.5904	Hadh	hydroxyacyl-Coenzyme A dehydrogenase	15107	ENSMUSG00000027984
1454713_s_at	-0.5852	Hdc	histidine decarboxylase	15186	ENSMUSG00000027360
1460194_at	-0.5721	Phyh	phytanoyl-CoA hydroxylase	16922	ENSMUSG00000026664
1451311_a_at	-0.5622	Adipor1	adiponectin receptor 1	72674	ENSMUSG00000026457
1448910_at	-0.5795	Pecr	peroxisomal trans-2-enoyl-CoA reductase	111175	ENSMUSG00000026189
1426968_a_at	-0.5417	Rdh10	retinol dehydrogenase 10 (all-trans)	98711	ENSMUSG00000025921
1434866_x_at	-0.6328	Cpt1a	carnitine palmitoyltransferase 1a, liver	12894	ENSMUSG00000024900
1449047_at	-0.5638	Hacl1	2-hydroxyacyl-CoA lyase 1	56794	ENSMUSG00000021884
1440354_at	-0.5999	Elovl7	ELOVL family member 7, elongation of long chain fatty acids (yeast)	74559	ENSMUSG00000021696
1440312_at	-0.6486	Elovl7	ELOVL family member 7, elongation of long chain fatty acids (yeast)	74559	ENSMUSG00000021696
1441091_at	-0.7136	Elovl7	ELOVL family member 7, elongation of long chain fatty acids (yeast)	74559	ENSMUSG00000021696
1448873_at	-0.574	Ocln	occludin	18260	ENSMUSG00000021638
1415917_at	-0.5853	Mthfd1	methylenetetrahydrofolate dehydrogenase (NADP+ dependent), methenyltetrahydrofolate cyclohydrolase, formyltetrahydrofolate synthase	108156	ENSMUSG00000021048
1415916_a_at	-0.5683	Mthfd1	methylenetetrahydrofolate dehydrogenase (NADP+ dependent), methenyltetrahydrofolate cyclohydrolase, formyltetrahydrofolate synthase	108156	ENSMUSG00000021048
1426690_a_at	-0.5595	Srebf1	sterol regulatory element binding transcription factor 1	20787	ENSMUSG00000020538
1424184_at	-0.6235	Acadvl	acyl-Coenzyme A dehydrogenase, very long chain	11370	ENSMUSG00000018574
1455435_s_at	-0.5972	Chdh	choline dehydrogenase	218865	ENSMUSG00000015970
1415897_a_at	-0.7644	Mgst1	microsomal glutathione S-transferase 1	56615	ENSMUSG00000008540
1450995_at	-0.6321	Folr1	folate receptor 1 (adult)	14275	ENSMUSG00000001827
1423891_at	-0.6956	Gstt3	glutathione S-transferase, theta 3	103140	ENSMUSG00000001665
1418186_at	-0.7652	Gstt1	glutathione S-transferase, theta 1	14871	ENSMUSG00000001663
biological process::small molecule metabolic process::GO:0044281
C=1711;O=71;E=38.21;R=1.86;rawP=1.80e-07;adjP=5.44e-05
Probe Set	r (hipPC1)	Symbol	Name	Entrez ID	Ensemble Gene ID
1456590_x_at	-0.6204	Akr1b3	aldo-keto reductase family 1, member B3 (aldose reductase)	11677	ENSMUSG00000001642
1437133_x_at	-0.5672	Akr1b3	aldo-keto reductase family 1, member B3 (aldose reductase)	11677	ENSMUSG00000001642
1448319_at	-0.55	Akr1b3	aldo-keto reductase family 1, member B3 (aldose reductase)	11677	ENSMUSG00000001642
1418186_at	-0.7652	Gstt1	glutathione S-transferase, theta 1	14871	ENSMUSG00000001663
1423891_at	-0.6956	Gstt3	glutathione S-transferase, theta 3	103140	ENSMUSG00000001665
1450995_at	-0.6321	Folr1	folate receptor 1 (adult)	14275	ENSMUSG00000001827
1416590_a_at	-0.5453	Rab34	RAB34, member of RAS oncogene family	19376	ENSMUSG00000002059
1416591_at	-0.5514	Rab34	RAB34, member of RAS oncogene family	19376	ENSMUSG00000002059
1416203_at	-0.6721	Aqp1	aquaporin 1	11826	ENSMUSG00000004655
1415897_a_at	-0.7644	Mgst1	microsomal glutathione S-transferase 1	56615	ENSMUSG00000008540
1449383_at	-0.638	Adssl1	adenylosuccinate synthetase like 1	11565	ENSMUSG00000011148
1455435_s_at	-0.5972	Chdh	choline dehydrogenase	218865	ENSMUSG00000015970
1436319_at	-0.6776	Sulf1	sulfatase 1	240725	ENSMUSG00000016918
1438200_at	-0.6728	Sulf1	sulfatase 1	240725	ENSMUSG00000016918
1422186_s_at	-0.5488	Cyb5r3	cytochrome b5 reductase 3	109754	ENSMUSG00000018042
1424184_at	-0.6235	Acadvl	acyl-Coenzyme A dehydrogenase, very long chain	11370	ENSMUSG00000018574
1416635_at	-0.6132	Smpdl3a	sphingomyelin phosphodiesterase, acid-like 3A	57319	ENSMUSG00000019872
1416060_at	-0.5509	Tbc1d15	TBC1 domain family, member 15	66687	ENSMUSG00000020130
1448562_at	-0.647	Upp1	uridine phosphorylase 1	22271	ENSMUSG00000020407
1426690_a_at	-0.5595	Srebf1	sterol regulatory element binding transcription factor 1	20787	ENSMUSG00000020538
1415917_at	-0.5853	Mthfd1	methylenetetrahydrofolate dehydrogenase (NADP+ dependent), methenyltetrahydrofolate cyclohydrolase, formyltetrahydrofolate synthase	108156	ENSMUSG00000021048
1415916_a_at	-0.5683	Mthfd1	methylenetetrahydrofolate dehydrogenase (NADP+ dependent), methenyltetrahydrofolate cyclohydrolase, formyltetrahydrofolate synthase	108156	ENSMUSG00000021048
1448513_a_at	-0.648	Npc2	Niemann Pick type C2	67963	ENSMUSG00000021242
1416901_at	-0.6563	Npc2	Niemann Pick type C2	67963	ENSMUSG00000021242
1448873_at	-0.574	Ocln	occludin	18260	ENSMUSG00000021638
1440354_at	-0.5999	Elovl7	ELOVL family member 7, elongation of long chain fatty acids (yeast)	74559	ENSMUSG00000021696
1440312_at	-0.6486	Elovl7	ELOVL family member 7, elongation of long chain fatty acids (yeast)	74559	ENSMUSG00000021696
1441091_at	-0.7136	Elovl7	ELOVL family member 7, elongation of long chain fatty acids (yeast)	74559	ENSMUSG00000021696
1449047_at	-0.5638	Hacl1	2-hydroxyacyl-CoA lyase 1	56794	ENSMUSG00000021884
1435184_at	-0.5727	Npr3	natriuretic peptide receptor 3	18162	ENSMUSG00000022206
1418372_at	-0.5594	Adsl	adenylosuccinate lyase	11564	ENSMUSG00000022407
1448136_at	-0.6153	Enpp2	ectonucleotide pyrophosphatase/phosphodiesterase 2	18606	ENSMUSG00000022425
1452233_at	-0.6058	Abcc1	ATP-binding cassette, sub-family C (CFTR/MRP), member 1	17250	ENSMUSG00000023088
1453139_at	-0.6135	Nudt12	nudix (nucleoside diphosphate linked moiety X)-type motif 12	67993	ENSMUSG00000024228
1434866_x_at	-0.6328	Cpt1a	carnitine palmitoyltransferase 1a, liver	12894	ENSMUSG00000024900
1454843_at	-0.6134	Prps2	phosphoribosyl pyrophosphate synthetase 2	110639	ENSMUSG00000025742
1426968_a_at	-0.5417	Rdh10	retinol dehydrogenase 10 (all-trans)	98711	ENSMUSG00000025921
1448910_at	-0.5795	Pecr	peroxisomal trans-2-enoyl-CoA reductase	111175	ENSMUSG00000026189
1451311_a_at	-0.5622	Adipor1	adiponectin receptor 1	72674	ENSMUSG00000026457
1460194_at	-0.5721	Phyh	phytanoyl-CoA hydroxylase	16922	ENSMUSG00000026664
1416430_at	-0.5913	Cat	catalase	12359	ENSMUSG00000027187
1454713_s_at	-0.5852	Hdc	histidine decarboxylase	15186	ENSMUSG00000027360
1455972_x_at	-0.5904	Hadh	hydroxyacyl-Coenzyme A dehydrogenase	15107	ENSMUSG00000027984
1449588_at	-0.5666	Abca4	ATP-binding cassette, sub-family A (ABC1), member 4	11304	ENSMUSG00000028125
1419367_at	-0.6712	Decr1	2,4-dienoyl CoA reductase 1, mitochondrial	67460	ENSMUSG00000028223
1416772_at	-0.7366	Cpt2	carnitine palmitoyltransferase 2	12896	ENSMUSG00000028607
1443849_x_at	-0.5832	Urod	uroporphyrinogen decarboxylase	22275	ENSMUSG00000028684
1423523_at	-0.6508	Aass	aminoadipate-semialdehyde synthase	30956	ENSMUSG00000029695
1452823_at	-0.8047	Gstk1	glutathione S-transferase kappa 1	76263	ENSMUSG00000029864
1434499_a_at	-0.5429	Ldhb	lactate dehydrogenase B	16832	ENSMUSG00000030246
1455015_at	-0.6341	Tbc1d9	TBC1 domain family, member 9	71310	ENSMUSG00000031709
1431302_a_at	-0.6394	Nudt7	nudix (nucleoside diphosphate linked moiety X)-type motif 7	67528	ENSMUSG00000031767
1419262_at	-0.6596	Acad8	acyl-Coenzyme A dehydrogenase family, member 8	66948	ENSMUSG00000031969
1419261_at	-0.6081	Acad8	acyl-Coenzyme A dehydrogenase family, member 8	66948	ENSMUSG00000031969
1449108_at	-0.5612	Fdx1	ferredoxin 1	14148	ENSMUSG00000032051
1416368_at	-0.6398	Gsta4	glutathione S-transferase, alpha 4	14860	ENSMUSG00000032348
1428485_at	-0.547	Car12	carbonic anyhydrase 12	76459	ENSMUSG00000032373
1417883_at	-0.6024	Gstt2	glutathione S-transferase, theta 2	14872	ENSMUSG00000033318
1418774_a_at	-0.5568	Atp7a	ATPase, Cu++ transporting, alpha polypeptide	11977	ENSMUSG00000033792
1436921_at	-0.6531	Atp7a	ATPase, Cu++ transporting, alpha polypeptide	11977	ENSMUSG00000033792
1433488_x_at	-0.6333	Gns	glucosamine (N-acetyl)-6-sulfatase	75612	ENSMUSG00000034707
1417772_at	-0.6669	Grhpr	glyoxylate reductase/hydroxypyruvate reductase	76238	ENSMUSG00000035637
1428146_s_at	-0.6776	Acaa2	acetyl-Coenzyme A acyltransferase 2 (mitochondrial 3-oxoacyl-Coenzyme A thiolase)	52538	ENSMUSG00000036880
1429727_at	-0.5861	Slc16a9	solute carrier family 16 (monocarboxylic acid transporters), member 9	66859	ENSMUSG00000037762
1450759_at	-0.6593	Bmp6	bone morphogenetic protein 6	12161	ENSMUSG00000039004
1416441_at	-0.7772	Pgcp	plasma glutamate carboxypeptidase	54381	ENSMUSG00000039007
1419456_at	-0.5514	Dcxr	dicarbonyl L-xylulose reductase	67880	ENSMUSG00000039450
1434354_at	-0.6671	Maob	monoamine oxidase B	109731	ENSMUSG00000040147
1416411_at	-0.7043	Gstm2	glutathione S-transferase, mu 2	14863	ENSMUSG00000040562
1417814_at	-0.638	Pla2g5	phospholipase A2, group V	18784	ENSMUSG00000041193
1430781_at	-0.6114	Ak7	adenylate kinase 7	78801	ENSMUSG00000041323
1435513_at	-0.6303	Htr2c	5-hydroxytryptamine (serotonin) receptor 2C	15560	ENSMUSG00000041380
1431429_a_at	-0.5923	Arl4a	ADP-ribosylation factor-like 4A	11861	ENSMUSG00000047446
1428663_at	-0.7356	Sgms2	sphingomyelin synthase 2	74442	ENSMUSG00000050931
1448491_at	-0.6609	Ech1	enoyl coenzyme A hydratase 1, peroxisomal	51798	ENSMUSG00000053898
1417962_s_at	-0.5639	Ghr	growth hormone receptor	14600	ENSMUSG00000055737
1425644_at	-0.6631	Lepr	leptin receptor	16847	ENSMUSG00000057722
1456156_at	-0.6995	Lepr	leptin receptor	16847	ENSMUSG00000057722
1437172_x_at	-0.5887	Hadhb	hydroxyacyl-Coenzyme A dehydrogenase/3-ketoacyl-Coenzyme A thiolase/enoyl-Coenzyme A hydratase (trifunctional protein), beta subunit	231086	ENSMUSG00000059447
1451580_a_at	-0.5528	Ttr	transthyretin	22139	ENSMUSG00000061808
1415984_at	-0.5903	Acadm	acyl-Coenzyme A dehydrogenase, medium chain	11364	ENSMUSG00000062908
1419595_a_at	-0.6117	Ggh	gamma-glutamyl hydrolase	14590	ENSMUSG00000073987
biological process::cellular amide metabolic process::GO:0043603
C=106;O=13;E=2.37;R=5.49;rawP=6.81e-07;adjP=0.0002
Probe Set	r (hipPC1)	Symbol	Name	Entrez ID	Ensemble Gene ID
1417962_s_at	-0.5639	Ghr	growth hormone receptor	14600	ENSMUSG00000055737
1428663_at	-0.7356	Sgms2	sphingomyelin synthase 2	74442	ENSMUSG00000050931
1416411_at	-0.7043	Gstm2	glutathione S-transferase, mu 2	14863	ENSMUSG00000040562
1416441_at	-0.7772	Pgcp	plasma glutamate carboxypeptidase	54381	ENSMUSG00000039007
1417883_at	-0.6024	Gstt2	glutathione S-transferase, theta 2	14872	ENSMUSG00000033318
1416368_at	-0.6398	Gsta4	glutathione S-transferase, alpha 4	14860	ENSMUSG00000032348
1434768_at	-0.7117	Tpp1	tripeptidyl peptidase I	12751	ENSMUSG00000030894
1452823_at	-0.8047	Gstk1	glutathione S-transferase kappa 1	76263	ENSMUSG00000029864
1439462_x_at	-0.6394	Tmed10	transmembrane emp24-like trafficking protein 10 (yeast)	68581	ENSMUSG00000021248
1439444_x_at	-0.6591	Tmed10	transmembrane emp24-like trafficking protein 10 (yeast)	68581	ENSMUSG00000021248
1454688_x_at	-0.6637	Tmed10	transmembrane emp24-like trafficking protein 10 (yeast)	68581	ENSMUSG00000021248
1416635_at	-0.6132	Smpdl3a	sphingomyelin phosphodiesterase, acid-like 3A	57319	ENSMUSG00000019872
1415897_a_at	-0.7644	Mgst1	microsomal glutathione S-transferase 1	56615	ENSMUSG00000008540
1423891_at	-0.6956	Gstt3	glutathione S-transferase, theta 3	103140	ENSMUSG00000001665
1418186_at	-0.7652	Gstt1	glutathione S-transferase, theta 1	14871	ENSMUSG00000001663
biological process::sulfur compound metabolic process::GO:0006790
C=132;O=14;E=2.95;R=4.75;rawP=1.52e-06;adjP=0.0003
Probe Set	r (hipPC1)	Symbol	Name	Entrez ID	Ensemble Gene ID
1418186_at	-0.7652	Gstt1	glutathione S-transferase, theta 1	14871	ENSMUSG00000001663
1423891_at	-0.6956	Gstt3	glutathione S-transferase, theta 3	103140	ENSMUSG00000001665
1415897_a_at	-0.7644	Mgst1	microsomal glutathione S-transferase 1	56615	ENSMUSG00000008540
1436319_at	-0.6776	Sulf1	sulfatase 1	240725	ENSMUSG00000016918
1438200_at	-0.6728	Sulf1	sulfatase 1	240725	ENSMUSG00000016918
1452277_at	-0.8142	Arsg	arylsulfatase G	74008	ENSMUSG00000020604
1427002_s_at	-0.718	Arsg	arylsulfatase G	74008	ENSMUSG00000020604
1415917_at	-0.5853	Mthfd1	methylenetetrahydrofolate dehydrogenase (NADP+ dependent), methenyltetrahydrofolate cyclohydrolase, formyltetrahydrofolate synthase	108156	ENSMUSG00000021048
1415916_a_at	-0.5683	Mthfd1	methylenetetrahydrofolate dehydrogenase (NADP+ dependent), methenyltetrahydrofolate cyclohydrolase, formyltetrahydrofolate synthase	108156	ENSMUSG00000021048
1448873_at	-0.574	Ocln	occludin	18260	ENSMUSG00000021638
1449409_at	-0.5651	Sult1c2	sulfotransferase family, cytosolic, 1C, member 2	69083	ENSMUSG00000023122
1452823_at	-0.8047	Gstk1	glutathione S-transferase kappa 1	76263	ENSMUSG00000029864
1416368_at	-0.6398	Gsta4	glutathione S-transferase, alpha 4	14860	ENSMUSG00000032348
1417883_at	-0.6024	Gstt2	glutathione S-transferase, theta 2	14872	ENSMUSG00000033318
1433488_x_at	-0.6333	Gns	glucosamine (N-acetyl)-6-sulfatase	75612	ENSMUSG00000034707
1416411_at	-0.7043	Gstm2	glutathione S-transferase, mu 2	14863	ENSMUSG00000040562
1417962_s_at	-0.5639	Ghr	growth hormone receptor	14600	ENSMUSG00000055737
biological process::fatty acid oxidation::GO:0019395
C=64;O=10;E=1.43;R=7.00;rawP=1.42e-06;adjP=0.0003
Probe Set	r (hipPC1)	Symbol	Name	Entrez ID	Ensemble Gene ID
1415984_at	-0.5903	Acadm	acyl-Coenzyme A dehydrogenase, medium chain	11364	ENSMUSG00000062908
1437172_x_at	-0.5887	Hadhb	hydroxyacyl-Coenzyme A dehydrogenase/3-ketoacyl-Coenzyme A thiolase/enoyl-Coenzyme A hydratase (trifunctional protein), beta subunit	231086	ENSMUSG00000059447
1428146_s_at	-0.6776	Acaa2	acetyl-Coenzyme A acyltransferase 2 (mitochondrial 3-oxoacyl-Coenzyme A thiolase)	52538	ENSMUSG00000036880
1419367_at	-0.6712	Decr1	2,4-dienoyl CoA reductase 1, mitochondrial	67460	ENSMUSG00000028223
1455972_x_at	-0.5904	Hadh	hydroxyacyl-Coenzyme A dehydrogenase	15107	ENSMUSG00000027984
1460194_at	-0.5721	Phyh	phytanoyl-CoA hydroxylase	16922	ENSMUSG00000026664
1451311_a_at	-0.5622	Adipor1	adiponectin receptor 1	72674	ENSMUSG00000026457
1434866_x_at	-0.6328	Cpt1a	carnitine palmitoyltransferase 1a, liver	12894	ENSMUSG00000024900
1449047_at	-0.5638	Hacl1	2-hydroxyacyl-CoA lyase 1	56794	ENSMUSG00000021884
1424184_at	-0.6235	Acadvl	acyl-Coenzyme A dehydrogenase, very long chain	11370	ENSMUSG00000018574
biological process::generation of precursor metabolites and energy::GO:0006091
C=269;O=20;E=6.01;R=3.33;rawP=2.82e-06;adjP=0.0004
Probe Set	r (hipPC1)	Symbol	Name	Entrez ID	Ensemble Gene ID
1428181_at	-0.6206	Etfb	electron transferring flavoprotein, beta polypeptide	110826	ENSMUSG00000004610
1424938_at	-0.6734	Steap1	six transmembrane epithelial antigen of the prostate 1	70358	ENSMUSG00000015652
1438773_at	-0.6775	Steap2	six transmembrane epithelial antigen of prostate 2	74051	ENSMUSG00000015653
1444290_at	-0.5606	Steap2	six transmembrane epithelial antigen of prostate 2	74051	ENSMUSG00000015653
1446071_at	-0.6398	Steap2	six transmembrane epithelial antigen of prostate 2	74051	ENSMUSG00000015653
1442359_at	-0.5785	Steap2	six transmembrane epithelial antigen of prostate 2	74051	ENSMUSG00000015653
1428636_at	-0.6549	Steap2	six transmembrane epithelial antigen of prostate 2	74051	ENSMUSG00000015653
1418372_at	-0.5594	Adsl	adenylosuccinate lyase	11564	ENSMUSG00000022407
1420654_a_at	-0.5972	Gbe1	glucan (1,4-alpha-), branching enzyme 1	74185	ENSMUSG00000022707
1416547_at	-0.5491	Ndufb3	NADH dehydrogenase (ubiquinone) 1 beta subcomplex 3	66495	ENSMUSG00000026032
1416430_at	-0.5913	Cat	catalase	12359	ENSMUSG00000027187
1451536_at	-0.5558	Mtfr1	mitochondrial fission regulator 1	67472	ENSMUSG00000027601
1423523_at	-0.6508	Aass	aminoadipate-semialdehyde synthase	30956	ENSMUSG00000029695
1434499_a_at	-0.5429	Ldhb	lactate dehydrogenase B	16832	ENSMUSG00000030246
1449108_at	-0.5612	Fdx1	ferredoxin 1	14148	ENSMUSG00000032051
1418774_a_at	-0.5568	Atp7a	ATPase, Cu++ transporting, alpha polypeptide	11977	ENSMUSG00000033792
1436921_at	-0.6531	Atp7a	ATPase, Cu++ transporting, alpha polypeptide	11977	ENSMUSG00000033792
1436590_at	-0.6437	Ppp1r3b	protein phosphatase 1, regulatory (inhibitor) subunit 3B	244416	ENSMUSG00000046794
1452256_at	-0.5549	1110002N22Rik	RIKEN cDNA 1110002N22 gene	68550	ENSMUSG00000046909
1457693_a_at	-0.6236	Eno4	enolase 4	226265	ENSMUSG00000048029
1457694_at	-0.6302	Eno4	enolase 4	226265	ENSMUSG00000048029
1448152_at	-0.5496	Igf2	insulin-like growth factor 2	16002	ENSMUSG00000048583
1423400_at	-0.6576	Kl	klotho	16591	ENSMUSG00000058488
1427282_a_at	-0.573	Fxn	frataxin	14297	ENSMUSG00000059363
1415984_at	-0.5903	Acadm	acyl-Coenzyme A dehydrogenase, medium chain	11364	ENSMUSG00000062908
1422614_s_at	-0.6642	Bloc1s1	biogenesis of lysosome-related organelles complex-1, subunit 1	14533	ENSMUSG00000090247
biological process::lipid oxidation::GO:0034440
C=67;O=10;E=1.50;R=6.68;rawP=2.18e-06;adjP=0.0004
Probe Set	r (hipPC1)	Symbol	Name	Entrez ID	Ensemble Gene ID
1415984_at	-0.5903	Acadm	acyl-Coenzyme A dehydrogenase, medium chain	11364	ENSMUSG00000062908
1437172_x_at	-0.5887	Hadhb	hydroxyacyl-Coenzyme A dehydrogenase/3-ketoacyl-Coenzyme A thiolase/enoyl-Coenzyme A hydratase (trifunctional protein), beta subunit	231086	ENSMUSG00000059447
1428146_s_at	-0.6776	Acaa2	acetyl-Coenzyme A acyltransferase 2 (mitochondrial 3-oxoacyl-Coenzyme A thiolase)	52538	ENSMUSG00000036880
1419367_at	-0.6712	Decr1	2,4-dienoyl CoA reductase 1, mitochondrial	67460	ENSMUSG00000028223
1455972_x_at	-0.5904	Hadh	hydroxyacyl-Coenzyme A dehydrogenase	15107	ENSMUSG00000027984
1460194_at	-0.5721	Phyh	phytanoyl-CoA hydroxylase	16922	ENSMUSG00000026664
1451311_a_at	-0.5622	Adipor1	adiponectin receptor 1	72674	ENSMUSG00000026457
1434866_x_at	-0.6328	Cpt1a	carnitine palmitoyltransferase 1a, liver	12894	ENSMUSG00000024900
1449047_at	-0.5638	Hacl1	2-hydroxyacyl-CoA lyase 1	56794	ENSMUSG00000021884
1424184_at	-0.6235	Acadvl	acyl-Coenzyme A dehydrogenase, very long chain	11370	ENSMUSG00000018574
molecular function::oxidoreductase activity::GO:0016491
C=654;O=45;E=14.62;R=3.08;rawP=1.84e-11;adjP=6.26e-09
Probe Set	r (hipPC1)	Symbol	Name	Entrez ID	Ensemble Gene ID
1456590_x_at	-0.6204	Akr1b3	aldo-keto reductase family 1, member B3 (aldose reductase)	11677	ENSMUSG00000001642
1437133_x_at	-0.5672	Akr1b3	aldo-keto reductase family 1, member B3 (aldose reductase)	11677	ENSMUSG00000001642
1448319_at	-0.55	Akr1b3	aldo-keto reductase family 1, member B3 (aldose reductase)	11677	ENSMUSG00000001642
1418186_at	-0.7652	Gstt1	glutathione S-transferase, theta 1	14871	ENSMUSG00000001663
1423627_at	-0.675	Nqo1	NAD(P)H dehydrogenase, quinone 1	18104	ENSMUSG00000003849
1420641_a_at	-0.6837	Sqrdl	sulfide quinone reductase-like (yeast)	59010	ENSMUSG00000005803
1415897_a_at	-0.7644	Mgst1	microsomal glutathione S-transferase 1	56615	ENSMUSG00000008540
1424938_at	-0.6734	Steap1	six transmembrane epithelial antigen of the prostate 1	70358	ENSMUSG00000015652
1438773_at	-0.6775	Steap2	six transmembrane epithelial antigen of prostate 2	74051	ENSMUSG00000015653
1444290_at	-0.5606	Steap2	six transmembrane epithelial antigen of prostate 2	74051	ENSMUSG00000015653
1446071_at	-0.6398	Steap2	six transmembrane epithelial antigen of prostate 2	74051	ENSMUSG00000015653
1442359_at	-0.5785	Steap2	six transmembrane epithelial antigen of prostate 2	74051	ENSMUSG00000015653
1428636_at	-0.6549	Steap2	six transmembrane epithelial antigen of prostate 2	74051	ENSMUSG00000015653
1455435_s_at	-0.5972	Chdh	choline dehydrogenase	218865	ENSMUSG00000015970
1422186_s_at	-0.5488	Cyb5r3	cytochrome b5 reductase 3	109754	ENSMUSG00000018042
1424184_at	-0.6235	Acadvl	acyl-Coenzyme A dehydrogenase, very long chain	11370	ENSMUSG00000018574
1422465_a_at	-0.6082	Nxn	nucleoredoxin	18230	ENSMUSG00000020844
1415917_at	-0.5853	Mthfd1	methylenetetrahydrofolate dehydrogenase (NADP+ dependent), methenyltetrahydrofolate cyclohydrolase, formyltetrahydrofolate synthase	108156	ENSMUSG00000021048
1415916_a_at	-0.5683	Mthfd1	methylenetetrahydrofolate dehydrogenase (NADP+ dependent), methenyltetrahydrofolate cyclohydrolase, formyltetrahydrofolate synthase	108156	ENSMUSG00000021048
1424099_at	-0.6555	Gpx8	glutathione peroxidase 8 (putative)	69590	ENSMUSG00000021760
1418331_at	-0.7345	1110031I02Rik	RIKEN cDNA 1110031I02 gene	66179	ENSMUSG00000025169
1438391_x_at	-0.6344	Hsd17b10	hydroxysteroid (17-beta) dehydrogenase 10	15108	ENSMUSG00000025260
1435731_x_at	-0.5604	Prdx4	peroxiredoxin 4	53381	ENSMUSG00000025289
1416166_a_at	-0.6828	Prdx4	peroxiredoxin 4	53381	ENSMUSG00000025289
1416167_at	-0.6844	Prdx4	peroxiredoxin 4	53381	ENSMUSG00000025289
1418808_at	-0.6555	Rdh5	retinol dehydrogenase 5	19682	ENSMUSG00000025350
1449218_at	-0.5903	Cox8b	cytochrome c oxidase, subunit VIIIb	12869	ENSMUSG00000025488
1426968_a_at	-0.5417	Rdh10	retinol dehydrogenase 10 (all-trans)	98711	ENSMUSG00000025921
1416547_at	-0.5491	Ndufb3	NADH dehydrogenase (ubiquinone) 1 beta subcomplex 3	66495	ENSMUSG00000026032
1448910_at	-0.5795	Pecr	peroxisomal trans-2-enoyl-CoA reductase	111175	ENSMUSG00000026189
1460194_at	-0.5721	Phyh	phytanoyl-CoA hydroxylase	16922	ENSMUSG00000026664
1416430_at	-0.5913	Cat	catalase	12359	ENSMUSG00000027187
1455972_x_at	-0.5904	Hadh	hydroxyacyl-Coenzyme A dehydrogenase	15107	ENSMUSG00000027984
1419367_at	-0.6712	Decr1	2,4-dienoyl CoA reductase 1, mitochondrial	67460	ENSMUSG00000028223
1434731_x_at	-0.6627	Prdx1	peroxiredoxin 1	18477	ENSMUSG00000028691
1416000_a_at	-0.5776	Prdx1	peroxiredoxin 1	18477	ENSMUSG00000028691
1436691_x_at	-0.5792	Prdx1	peroxiredoxin 1	18477	ENSMUSG00000028691
1433866_x_at	-0.6708	Prdx1	peroxiredoxin 1	18477	ENSMUSG00000028691
1423523_at	-0.6508	Aass	aminoadipate-semialdehyde synthase	30956	ENSMUSG00000029695
1452823_at	-0.8047	Gstk1	glutathione S-transferase kappa 1	76263	ENSMUSG00000029864
1434499_a_at	-0.5429	Ldhb	lactate dehydrogenase B	16832	ENSMUSG00000030246
1429001_at	-0.6737	Pir	pirin	69656	ENSMUSG00000031379
1419262_at	-0.6596	Acad8	acyl-Coenzyme A dehydrogenase family, member 8	66948	ENSMUSG00000031969
1419261_at	-0.6081	Acad8	acyl-Coenzyme A dehydrogenase family, member 8	66948	ENSMUSG00000031969
1449108_at	-0.5612	Fdx1	ferredoxin 1	14148	ENSMUSG00000032051
1417772_at	-0.6669	Grhpr	glyoxylate reductase/hydroxypyruvate reductase	76238	ENSMUSG00000035637
1419456_at	-0.5514	Dcxr	dicarbonyl L-xylulose reductase	67880	ENSMUSG00000039450
1434354_at	-0.6671	Maob	monoamine oxidase B	109731	ENSMUSG00000040147
1451386_at	-0.5478	Blvrb	biliverdin reductase B (flavin reductase (NADPH))	233016	ENSMUSG00000040466
1433551_at	-0.6635	Vat1l	vesicle amine transport protein 1 homolog-like (T. californica)	270097	ENSMUSG00000046844
1451277_at	-0.7099	Zadh2	zinc binding alcohol dehydrogenase, domain containing 2	225791	ENSMUSG00000049090
1435275_at	-0.6163	Cox6b2	cytochrome c oxidase subunit VIb polypeptide 2	333182	ENSMUSG00000051811
1427282_a_at	-0.573	Fxn	frataxin	14297	ENSMUSG00000059363
1437172_x_at	-0.5887	Hadhb	hydroxyacyl-Coenzyme A dehydrogenase/3-ketoacyl-Coenzyme A thiolase/enoyl-Coenzyme A hydratase (trifunctional protein), beta subunit	231086	ENSMUSG00000059447
1415984_at	-0.5903	Acadm	acyl-Coenzyme A dehydrogenase, medium chain	11364	ENSMUSG00000062908
1419435_at	-0.5732	Aox1	aldehyde oxidase 1	11761	ENSMUSG00000063558
1433503_at	-0.6016	Ptgr2	prostaglandin reductase 2	77219	ENSMUSG00000072946
1453156_s_at	-0.5622	Ptgr2	prostaglandin reductase 2	77219	ENSMUSG00000072946
1418709_at	-0.6463	Cox7a1	cytochrome c oxidase, subunit VIIa 1	12865	ENSMUSG00000074218
molecular function::glutathione transferase activity::GO:0004364
C=23;O=7;E=0.51;R=13.62;rawP=4.74e-07;adjP=8.06e-05
Probe Set	r (hipPC1)	Symbol	Name	Entrez ID	Ensemble Gene ID
1416411_at	-0.7043	Gstm2	glutathione S-transferase, mu 2	14863	ENSMUSG00000040562
1417883_at	-0.6024	Gstt2	glutathione S-transferase, theta 2	14872	ENSMUSG00000033318
1416368_at	-0.6398	Gsta4	glutathione S-transferase, alpha 4	14860	ENSMUSG00000032348
1452823_at	-0.8047	Gstk1	glutathione S-transferase kappa 1	76263	ENSMUSG00000029864
1415897_a_at	-0.7644	Mgst1	microsomal glutathione S-transferase 1	56615	ENSMUSG00000008540
1423891_at	-0.6956	Gstt3	glutathione S-transferase, theta 3	103140	ENSMUSG00000001665
1418186_at	-0.7652	Gstt1	glutathione S-transferase, theta 1	14871	ENSMUSG00000001663
molecular function::antioxidant activity::GO:0016209
C=54;O=9;E=1.21;R=7.46;rawP=2.77e-06;adjP=0.0003
Probe Set	r (hipPC1)	Symbol	Name	Entrez ID	Ensemble Gene ID
1418186_at	-0.7652	Gstt1	glutathione S-transferase, theta 1	14871	ENSMUSG00000001663
1423627_at	-0.675	Nqo1	NAD(P)H dehydrogenase, quinone 1	18104	ENSMUSG00000003849
1415897_a_at	-0.7644	Mgst1	microsomal glutathione S-transferase 1	56615	ENSMUSG00000008540
1422465_a_at	-0.6082	Nxn	nucleoredoxin	18230	ENSMUSG00000020844
1424099_at	-0.6555	Gpx8	glutathione peroxidase 8 (putative)	69590	ENSMUSG00000021760
1435731_x_at	-0.5604	Prdx4	peroxiredoxin 4	53381	ENSMUSG00000025289
1416166_a_at	-0.6828	Prdx4	peroxiredoxin 4	53381	ENSMUSG00000025289
1416167_at	-0.6844	Prdx4	peroxiredoxin 4	53381	ENSMUSG00000025289
1416430_at	-0.5913	Cat	catalase	12359	ENSMUSG00000027187
1434731_x_at	-0.6627	Prdx1	peroxiredoxin 1	18477	ENSMUSG00000028691
1416000_a_at	-0.5776	Prdx1	peroxiredoxin 1	18477	ENSMUSG00000028691
1436691_x_at	-0.5792	Prdx1	peroxiredoxin 1	18477	ENSMUSG00000028691
1433866_x_at	-0.6708	Prdx1	peroxiredoxin 1	18477	ENSMUSG00000028691
1452823_at	-0.8047	Gstk1	glutathione S-transferase kappa 1	76263	ENSMUSG00000029864
molecular function::peroxidase activity::GO:0004601
C=32;O=7;E=0.72;R=9.79;rawP=5.47e-06;adjP=0.0004
Probe Set	r (hipPC1)	Symbol	Name	Entrez ID	Ensemble Gene ID
1452823_at	-0.8047	Gstk1	glutathione S-transferase kappa 1	76263	ENSMUSG00000029864
1436691_x_at	-0.5792	Prdx1	peroxiredoxin 1	18477	ENSMUSG00000028691
1435731_x_at	-0.5604	Prdx4	peroxiredoxin 4	53381	ENSMUSG00000025289
1434731_x_at	-0.6627	Prdx1	peroxiredoxin 1	18477	ENSMUSG00000028691
1433866_x_at	-0.6708	Prdx1	peroxiredoxin 1	18477	ENSMUSG00000028691
1424099_at	-0.6555	Gpx8	glutathione peroxidase 8 (putative)	69590	ENSMUSG00000021760
1418186_at	-0.7652	Gstt1	glutathione S-transferase, theta 1	14871	ENSMUSG00000001663
1416430_at	-0.5913	Cat	catalase	12359	ENSMUSG00000027187
1416167_at	-0.6844	Prdx4	peroxiredoxin 4	53381	ENSMUSG00000025289
1416166_a_at	-0.6828	Prdx4	peroxiredoxin 4	53381	ENSMUSG00000025289
1416000_a_at	-0.5776	Prdx1	peroxiredoxin 1	18477	ENSMUSG00000028691
1415897_a_at	-0.7644	Mgst1	microsomal glutathione S-transferase 1	56615	ENSMUSG00000008540
molecular function::oxidoreductase activity, acting on peroxide as acceptor::GO:0016684
C=32;O=7;E=0.72;R=9.79;rawP=5.47e-06;adjP=0.0004
Probe Set	r (hipPC1)	Symbol	Name	Entrez ID	Ensemble Gene ID
1418186_at	-0.7652	Gstt1	glutathione S-transferase, theta 1	14871	ENSMUSG00000001663
1415897_a_at	-0.7644	Mgst1	microsomal glutathione S-transferase 1	56615	ENSMUSG00000008540
1424099_at	-0.6555	Gpx8	glutathione peroxidase 8 (putative)	69590	ENSMUSG00000021760
1435731_x_at	-0.5604	Prdx4	peroxiredoxin 4	53381	ENSMUSG00000025289
1416166_a_at	-0.6828	Prdx4	peroxiredoxin 4	53381	ENSMUSG00000025289
1416167_at	-0.6844	Prdx4	peroxiredoxin 4	53381	ENSMUSG00000025289
1416430_at	-0.5913	Cat	catalase	12359	ENSMUSG00000027187
1434731_x_at	-0.6627	Prdx1	peroxiredoxin 1	18477	ENSMUSG00000028691
1416000_a_at	-0.5776	Prdx1	peroxiredoxin 1	18477	ENSMUSG00000028691
1436691_x_at	-0.5792	Prdx1	peroxiredoxin 1	18477	ENSMUSG00000028691
1433866_x_at	-0.6708	Prdx1	peroxiredoxin 1	18477	ENSMUSG00000028691
1452823_at	-0.8047	Gstk1	glutathione S-transferase kappa 1	76263	ENSMUSG00000029864
molecular function::cofactor binding::GO:0048037
C=244;O=18;E=5.45;R=3.30;rawP=9.99e-06;adjP=0.0005
Probe Set	r (hipPC1)	Symbol	Name	Entrez ID	Ensemble Gene ID
1419435_at	-0.5732	Aox1	aldehyde oxidase 1	11761	ENSMUSG00000063558
1415984_at	-0.5903	Acadm	acyl-Coenzyme A dehydrogenase, medium chain	11364	ENSMUSG00000062908
1437172_x_at	-0.5887	Hadhb	hydroxyacyl-Coenzyme A dehydrogenase/3-ketoacyl-Coenzyme A thiolase/enoyl-Coenzyme A hydratase (trifunctional protein), beta subunit	231086	ENSMUSG00000059447
1434354_at	-0.6671	Maob	monoamine oxidase B	109731	ENSMUSG00000040147
1417772_at	-0.6669	Grhpr	glyoxylate reductase/hydroxypyruvate reductase	76238	ENSMUSG00000035637
1419262_at	-0.6596	Acad8	acyl-Coenzyme A dehydrogenase family, member 8	66948	ENSMUSG00000031969
1419261_at	-0.6081	Acad8	acyl-Coenzyme A dehydrogenase family, member 8	66948	ENSMUSG00000031969
1434499_a_at	-0.5429	Ldhb	lactate dehydrogenase B	16832	ENSMUSG00000030246
1419367_at	-0.6712	Decr1	2,4-dienoyl CoA reductase 1, mitochondrial	67460	ENSMUSG00000028223
1455972_x_at	-0.5904	Hadh	hydroxyacyl-Coenzyme A dehydrogenase	15107	ENSMUSG00000027984
1454713_s_at	-0.5852	Hdc	histidine decarboxylase	15186	ENSMUSG00000027360
1416430_at	-0.5913	Cat	catalase	12359	ENSMUSG00000027187
1460194_at	-0.5721	Phyh	phytanoyl-CoA hydroxylase	16922	ENSMUSG00000026664
1438391_x_at	-0.6344	Hsd17b10	hydroxysteroid (17-beta) dehydrogenase 10	15108	ENSMUSG00000025260
1449047_at	-0.5638	Hacl1	2-hydroxyacyl-CoA lyase 1	56794	ENSMUSG00000021884
1444186_at	0.5578	Agxt2l2	alanine-glyoxylate aminotransferase 2-like 2	72947	ENSMUSG00000020359
1424184_at	-0.6235	Acadvl	acyl-Coenzyme A dehydrogenase, very long chain	11370	ENSMUSG00000018574
1422186_s_at	-0.5488	Cyb5r3	cytochrome b5 reductase 3	109754	ENSMUSG00000018042
1455435_s_at	-0.5972	Chdh	choline dehydrogenase	218865	ENSMUSG00000015970
molecular function::coenzyme binding::GO:0050662
C=173;O=15;E=3.87;R=3.88;rawP=8.12e-06;adjP=0.0005
Probe Set	r (hipPC1)	Symbol	Name	Entrez ID	Ensemble Gene ID
1455435_s_at	-0.5972	Chdh	choline dehydrogenase	218865	ENSMUSG00000015970
1422186_s_at	-0.5488	Cyb5r3	cytochrome b5 reductase 3	109754	ENSMUSG00000018042
1424184_at	-0.6235	Acadvl	acyl-Coenzyme A dehydrogenase, very long chain	11370	ENSMUSG00000018574
1449047_at	-0.5638	Hacl1	2-hydroxyacyl-CoA lyase 1	56794	ENSMUSG00000021884
1438391_x_at	-0.6344	Hsd17b10	hydroxysteroid (17-beta) dehydrogenase 10	15108	ENSMUSG00000025260
1416430_at	-0.5913	Cat	catalase	12359	ENSMUSG00000027187
1455972_x_at	-0.5904	Hadh	hydroxyacyl-Coenzyme A dehydrogenase	15107	ENSMUSG00000027984
1419367_at	-0.6712	Decr1	2,4-dienoyl CoA reductase 1, mitochondrial	67460	ENSMUSG00000028223
1434499_a_at	-0.5429	Ldhb	lactate dehydrogenase B	16832	ENSMUSG00000030246
1419262_at	-0.6596	Acad8	acyl-Coenzyme A dehydrogenase family, member 8	66948	ENSMUSG00000031969
1419261_at	-0.6081	Acad8	acyl-Coenzyme A dehydrogenase family, member 8	66948	ENSMUSG00000031969
1417772_at	-0.6669	Grhpr	glyoxylate reductase/hydroxypyruvate reductase	76238	ENSMUSG00000035637
1434354_at	-0.6671	Maob	monoamine oxidase B	109731	ENSMUSG00000040147
1437172_x_at	-0.5887	Hadhb	hydroxyacyl-Coenzyme A dehydrogenase/3-ketoacyl-Coenzyme A thiolase/enoyl-Coenzyme A hydratase (trifunctional protein), beta subunit	231086	ENSMUSG00000059447
1415984_at	-0.5903	Acadm	acyl-Coenzyme A dehydrogenase, medium chain	11364	ENSMUSG00000062908
1419435_at	-0.5732	Aox1	aldehyde oxidase 1	11761	ENSMUSG00000063558
molecular function::peptidase activator activity::GO:0016504
C=29;O=6;E=0.65;R=9.26;rawP=3.68e-05;adjP=0.0016
Probe Set	r (hipPC1)	Symbol	Name	Entrez ID	Ensemble Gene ID
1417189_at	-0.5888	Psme2	proteasome (prosome, macropain) 28 subunit, beta	19188	ENSMUSG00000079197
1426323_x_at	-0.5542	Siva1	SIVA1, apoptosis-inducing factor	30954	ENSMUSG00000064326
1423254_x_at	-0.6491	Rps27l	ribosomal protein S27-like	67941	ENSMUSG00000036781
1435429_x_at	-0.6516	Rps27l	ribosomal protein S27-like	67941	ENSMUSG00000036781
1450925_a_at	-0.6539	Rps27l	ribosomal protein S27-like	67941	ENSMUSG00000036781
1437165_a_at	-0.682	Pcolce	procollagen C-endopeptidase enhancer protein	18542	ENSMUSG00000029718
1448433_a_at	-0.5981	Pcolce	procollagen C-endopeptidase enhancer protein	18542	ENSMUSG00000029718
1451527_at	-0.6749	Pcolce2	procollagen C-endopeptidase enhancer 2	76477	ENSMUSG00000015354
1418412_at	-0.5582	Tpd52l1	tumor protein D52-like 1	21987	ENSMUSG00000000296
molecular function::metallochaperone activity::GO:0016530
C=4;O=3;E=0.09;R=33.55;rawP=4.36e-05;adjP=0.0016
Probe Set	r (hipPC1)	Symbol	Name	Entrez ID	Ensemble Gene ID
1415760_s_at	-0.6007	Atox1	ATX1 (antioxidant protein 1) homolog 1 (yeast)	11927	ENSMUSG00000018585
1418774_a_at	-0.5568	Atp7a	ATPase, Cu++ transporting, alpha polypeptide	11977	ENSMUSG00000033792
1436921_at	-0.6531	Atp7a	ATPase, Cu++ transporting, alpha polypeptide	11977	ENSMUSG00000033792
1427282_a_at	-0.573	Fxn	frataxin	14297	ENSMUSG00000059363
molecular function::NAD binding::GO:0051287
C=48;O=7;E=1.07;R=6.52;rawP=8.81e-05;adjP=0.0024
Probe Set	r (hipPC1)	Symbol	Name	Entrez ID	Ensemble Gene ID
1419435_at	-0.5732	Aox1	aldehyde oxidase 1	11761	ENSMUSG00000063558
1437172_x_at	-0.5887	Hadhb	hydroxyacyl-Coenzyme A dehydrogenase/3-ketoacyl-Coenzyme A thiolase/enoyl-Coenzyme A hydratase (trifunctional protein), beta subunit	231086	ENSMUSG00000059447
1417772_at	-0.6669	Grhpr	glyoxylate reductase/hydroxypyruvate reductase	76238	ENSMUSG00000035637
1434499_a_at	-0.5429	Ldhb	lactate dehydrogenase B	16832	ENSMUSG00000030246
1455972_x_at	-0.5904	Hadh	hydroxyacyl-Coenzyme A dehydrogenase	15107	ENSMUSG00000027984
1438391_x_at	-0.6344	Hsd17b10	hydroxysteroid (17-beta) dehydrogenase 10	15108	ENSMUSG00000025260
1422186_s_at	-0.5488	Cyb5r3	cytochrome b5 reductase 3	109754	ENSMUSG00000018042
cellular component::mitochondrion::GO:0005739
C=1480;O=67;E=32.70;R=2.05;rawP=1.08e-08;adjP=1.95e-06
Probe Set	r (hipPC1)	Symbol	Name	Entrez ID	Ensemble Gene ID
1428181_at	-0.6206	Etfb	electron transferring flavoprotein, beta polypeptide	110826	ENSMUSG00000004610
1420641_a_at	-0.6837	Sqrdl	sulfide quinone reductase-like (yeast)	59010	ENSMUSG00000005803
1415897_a_at	-0.7644	Mgst1	microsomal glutathione S-transferase 1	56615	ENSMUSG00000008540
1452637_a_at	-0.5962	Bola1	bolA-like 1 (E. coli)	69168	ENSMUSG00000015943
1455435_s_at	-0.5972	Chdh	choline dehydrogenase	218865	ENSMUSG00000015970
1422186_s_at	-0.5488	Cyb5r3	cytochrome b5 reductase 3	109754	ENSMUSG00000018042
1424184_at	-0.6235	Acadvl	acyl-Coenzyme A dehydrogenase, very long chain	11370	ENSMUSG00000018574
1416271_at	-0.555	Perp	PERP, TP53 apoptosis effector	64058	ENSMUSG00000019851
1416060_at	-0.5509	Tbc1d15	TBC1 domain family, member 15	66687	ENSMUSG00000020130
1444186_at	0.5578	Agxt2l2	alanine-glyoxylate aminotransferase 2-like 2	72947	ENSMUSG00000020359
1428554_a_at	-0.5484	Slirp	SRA stem-loop interacting RNA binding protein	380773	ENSMUSG00000021040
1415917_at	-0.5853	Mthfd1	methylenetetrahydrofolate dehydrogenase (NADP+ dependent), methenyltetrahydrofolate cyclohydrolase, formyltetrahydrofolate synthase	108156	ENSMUSG00000021048
1415916_a_at	-0.5683	Mthfd1	methylenetetrahydrofolate dehydrogenase (NADP+ dependent), methenyltetrahydrofolate cyclohydrolase, formyltetrahydrofolate synthase	108156	ENSMUSG00000021048
1416910_at	-0.5888	Dnajc15	DnaJ (Hsp40) homolog, subfamily C, member 15	66148	ENSMUSG00000022013
1418372_at	-0.5594	Adsl	adenylosuccinate lyase	11564	ENSMUSG00000022407
1450726_at	-0.6604	Asah2	N-acylsphingosine amidohydrolase 2	54447	ENSMUSG00000024887
1434866_x_at	-0.6328	Cpt1a	carnitine palmitoyltransferase 1a, liver	12894	ENSMUSG00000024900
1438391_x_at	-0.6344	Hsd17b10	hydroxysteroid (17-beta) dehydrogenase 10	15108	ENSMUSG00000025260
1435731_x_at	-0.5604	Prdx4	peroxiredoxin 4	53381	ENSMUSG00000025289
1416166_a_at	-0.6828	Prdx4	peroxiredoxin 4	53381	ENSMUSG00000025289
1416167_at	-0.6844	Prdx4	peroxiredoxin 4	53381	ENSMUSG00000025289
1449218_at	-0.5903	Cox8b	cytochrome c oxidase, subunit VIIIb	12869	ENSMUSG00000025488
1418384_at	-0.6871	Apool	apolipoprotein O-like	68117	ENSMUSG00000025525
1421014_a_at	-0.5595	Clybl	citrate lyase beta like	69634	ENSMUSG00000025545
1428487_s_at	-0.5514	Coq10b	coenzyme Q10 homolog B (S. cerevisiae)	67876	ENSMUSG00000025981
1416547_at	-0.5491	Ndufb3	NADH dehydrogenase (ubiquinone) 1 beta subcomplex 3	66495	ENSMUSG00000026032
1448910_at	-0.5795	Pecr	peroxisomal trans-2-enoyl-CoA reductase	111175	ENSMUSG00000026189
1428619_at	-0.6146	Fam36a	family with sequence similarity 36, member A	66359	ENSMUSG00000026500
1460194_at	-0.5721	Phyh	phytanoyl-CoA hydroxylase	16922	ENSMUSG00000026664
1416430_at	-0.5913	Cat	catalase	12359	ENSMUSG00000027187
1451536_at	-0.5558	Mtfr1	mitochondrial fission regulator 1	67472	ENSMUSG00000027601
1455972_x_at	-0.5904	Hadh	hydroxyacyl-Coenzyme A dehydrogenase	15107	ENSMUSG00000027984
1419367_at	-0.6712	Decr1	2,4-dienoyl CoA reductase 1, mitochondrial	67460	ENSMUSG00000028223
1425196_a_at	-0.5722	Hint2	histidine triad nucleotide binding protein 2	68917	ENSMUSG00000028470
1416772_at	-0.7366	Cpt2	carnitine palmitoyltransferase 2	12896	ENSMUSG00000028607
1434731_x_at	-0.6627	Prdx1	peroxiredoxin 1	18477	ENSMUSG00000028691
1416000_a_at	-0.5776	Prdx1	peroxiredoxin 1	18477	ENSMUSG00000028691
1436691_x_at	-0.5792	Prdx1	peroxiredoxin 1	18477	ENSMUSG00000028691
1433866_x_at	-0.6708	Prdx1	peroxiredoxin 1	18477	ENSMUSG00000028691
1423523_at	-0.6508	Aass	aminoadipate-semialdehyde synthase	30956	ENSMUSG00000029695
1452823_at	-0.8047	Gstk1	glutathione S-transferase kappa 1	76263	ENSMUSG00000029864
1438659_x_at	-0.5956	Chchd6	coiled-coil-helix-coiled-coil-helix domain containing 6	66098	ENSMUSG00000030086
1434499_a_at	-0.5429	Ldhb	lactate dehydrogenase B	16832	ENSMUSG00000030246
1434768_at	-0.7117	Tpp1	tripeptidyl peptidase I	12751	ENSMUSG00000030894
1438656_x_at	-0.6211	Timm17b	translocase of inner mitochondrial membrane 17b	21855	ENSMUSG00000031158
1419262_at	-0.6596	Acad8	acyl-Coenzyme A dehydrogenase family, member 8	66948	ENSMUSG00000031969
1419261_at	-0.6081	Acad8	acyl-Coenzyme A dehydrogenase family, member 8	66948	ENSMUSG00000031969
1449108_at	-0.5612	Fdx1	ferredoxin 1	14148	ENSMUSG00000032051
1416368_at	-0.6398	Gsta4	glutathione S-transferase, alpha 4	14860	ENSMUSG00000032348
1430287_s_at	-0.6741	Hemk1	HemK methyltransferase family member 1	69536	ENSMUSG00000032579
1428146_s_at	-0.6776	Acaa2	acetyl-Coenzyme A acyltransferase 2 (mitochondrial 3-oxoacyl-Coenzyme A thiolase)	52538	ENSMUSG00000036880
1431510_s_at	-0.6655	Cmc1	COX assembly mitochondrial protein homolog (S. cerevisiae)	67899	ENSMUSG00000039163
1434354_at	-0.6671	Maob	monoamine oxidase B	109731	ENSMUSG00000040147
1452585_at	-0.5504	Mrps28	mitochondrial ribosomal protein S28	66230	ENSMUSG00000040269
1418996_a_at	-0.5639	Lyrm5	LYR motif containing 5	67636	ENSMUSG00000040370
1459793_s_at	-0.5716	Lyrm5	LYR motif containing 5	67636	ENSMUSG00000040370
1451405_at	-0.6286	Pcca	propionyl-Coenzyme A carboxylase, alpha polypeptide	110821	ENSMUSG00000041650
1416695_at	-0.6694	Tspo	translocator protein	12257	ENSMUSG00000041736
1456251_x_at	-0.7625	Tspo	translocator protein	12257	ENSMUSG00000041736
1438948_x_at	-0.7676	Tspo	translocator protein	12257	ENSMUSG00000041736
1452256_at	-0.5549	1110002N22Rik	RIKEN cDNA 1110002N22 gene	68550	ENSMUSG00000046909
1451277_at	-0.7099	Zadh2	zinc binding alcohol dehydrogenase, domain containing 2	225791	ENSMUSG00000049090
1429213_at	-0.5532	Ndufaf6	NADH dehydrogenase (ubiquinone) complex I, assembly factor 6	76947	ENSMUSG00000050323
1420624_a_at	-0.613	Vamp8	vesicle-associated membrane protein 8	22320	ENSMUSG00000050732
1435275_at	-0.6163	Cox6b2	cytochrome c oxidase subunit VIb polypeptide 2	333182	ENSMUSG00000051811
1448491_at	-0.6609	Ech1	enoyl coenzyme A hydratase 1, peroxisomal	51798	ENSMUSG00000053898
1417962_s_at	-0.5639	Ghr	growth hormone receptor	14600	ENSMUSG00000055737
1421938_at	-0.6774	Serhl	serine hydrolase-like	68607	ENSMUSG00000058586
1427282_a_at	-0.573	Fxn	frataxin	14297	ENSMUSG00000059363
1437172_x_at	-0.5887	Hadhb	hydroxyacyl-Coenzyme A dehydrogenase/3-ketoacyl-Coenzyme A thiolase/enoyl-Coenzyme A hydratase (trifunctional protein), beta subunit	231086	ENSMUSG00000059447
1415984_at	-0.5903	Acadm	acyl-Coenzyme A dehydrogenase, medium chain	11364	ENSMUSG00000062908
1420485_at	-0.5726	Nol7	nucleolar protein 7	70078	ENSMUSG00000063200
1426323_x_at	-0.5542	Siva1	SIVA1, apoptosis-inducing factor	30954	ENSMUSG00000064326
1433503_at	-0.6016	Ptgr2	prostaglandin reductase 2	77219	ENSMUSG00000072946
1453156_s_at	-0.5622	Ptgr2	prostaglandin reductase 2	77219	ENSMUSG00000072946
1418709_at	-0.6463	Cox7a1	cytochrome c oxidase, subunit VIIa 1	12865	ENSMUSG00000074218
1422614_s_at	-0.6642	Bloc1s1	biogenesis of lysosome-related organelles complex-1, subunit 1	14533	ENSMUSG00000090247
1456204_at	-0.6171	2010107H07Rik	RIKEN cDNA 2010107H07 gene	66487	NULL
cellular component::cytoplasm::GO:0005737
C=7828;O=226;E=172.98;R=1.31;rawP=1.92e-08;adjP=1.95e-06
Probe Set	r (hipPC1)	Symbol	Name	Entrez ID	Ensemble Gene ID
1456204_at	-0.6171	2010107H07Rik	RIKEN cDNA 2010107H07 gene	66487	NULL
1428765_at	0.5468	Meg3	maternally expressed 3	17263	NULL
1418656_at	-0.5653	Lsm5	LSM5 homolog, U6 small nuclear RNA associated (S. cerevisiae)	66373	ENSMUSG00000091625
1422614_s_at	-0.6642	Bloc1s1	biogenesis of lysosome-related organelles complex-1, subunit 1	14533	ENSMUSG00000090247
1436657_at	-0.6764	Gm11744	predicted gene 11744	100038570	ENSMUSG00000075410
1438968_x_at	-0.6577	Spint2	serine protease inhibitor, Kunitz type 2	20733	ENSMUSG00000074227
1418709_at	-0.6463	Cox7a1	cytochrome c oxidase, subunit VIIa 1	12865	ENSMUSG00000074218
1419595_a_at	-0.6117	Ggh	gamma-glutamyl hydrolase	14590	ENSMUSG00000073987
1433503_at	-0.6016	Ptgr2	prostaglandin reductase 2	77219	ENSMUSG00000072946
1453156_s_at	-0.5622	Ptgr2	prostaglandin reductase 2	77219	ENSMUSG00000072946
1434702_at	-0.5492	Ddrgk1	DDRGK domain containing 1	77006	ENSMUSG00000068290
1419573_a_at	-0.6785	Lgals1	lectin, galactose binding, soluble 1	16852	ENSMUSG00000068220
1455439_a_at	-0.7389	Lgals1	lectin, galactose binding, soluble 1	16852	ENSMUSG00000068220
1423424_at	-0.5426	Zic3	zinc finger protein of the cerebellum 3	22773	ENSMUSG00000067860
1426323_x_at	-0.5542	Siva1	SIVA1, apoptosis-inducing factor	30954	ENSMUSG00000064326
1419435_at	-0.5732	Aox1	aldehyde oxidase 1	11761	ENSMUSG00000063558
1453562_a_at	-0.6074	Nmral1	NmrA-like family domain containing 1	67824	ENSMUSG00000063445
1451139_at	-0.6041	Slc39a4	solute carrier family 39 (zinc transporter), member 4	72027	ENSMUSG00000063354
1420485_at	-0.5726	Nol7	nucleolar protein 7	70078	ENSMUSG00000063200
1455083_at	-0.5691	Atp11c	ATPase, class VI, type 11C	320940	ENSMUSG00000062949
1415984_at	-0.5903	Acadm	acyl-Coenzyme A dehydrogenase, medium chain	11364	ENSMUSG00000062908
1437172_x_at	-0.5887	Hadhb	hydroxyacyl-Coenzyme A dehydrogenase/3-ketoacyl-Coenzyme A thiolase/enoyl-Coenzyme A hydratase (trifunctional protein), beta subunit	231086	ENSMUSG00000059447
1427282_a_at	-0.573	Fxn	frataxin	14297	ENSMUSG00000059363
1421938_at	-0.6774	Serhl	serine hydrolase-like	68607	ENSMUSG00000058586
1427889_at	0.7039	Spna2	spectrin alpha 2	20740	ENSMUSG00000057738
1434423_at	-0.6793	Gulp1	GULP, engulfment adaptor PTB domain containing 1	70676	ENSMUSG00000056870
1424340_at	-0.6287	Lrrc48	leucine rich repeat containing 48	74665	ENSMUSG00000056598
1417962_s_at	-0.5639	Ghr	growth hormone receptor	14600	ENSMUSG00000055737
1448491_at	-0.6609	Ech1	enoyl coenzyme A hydratase 1, peroxisomal	51798	ENSMUSG00000053898
1455841_s_at	-0.5775	Grwd1	glutamate-rich WD repeat containing 1	101612	ENSMUSG00000053801
1417083_at	-0.5695	Sec61b	Sec61 beta subunit	66212	ENSMUSG00000053317
1448363_at	-0.5619	Yap1	yes-associated protein 1	22601	ENSMUSG00000053110
1416608_a_at	-0.579	BC004004	cDNA sequence BC004004	80748	ENSMUSG00000052712
1435275_at	-0.6163	Cox6b2	cytochrome c oxidase subunit VIb polypeptide 2	333182	ENSMUSG00000051811
1426318_at	-0.6783	Serpinb1b	serine (or cysteine) peptidase inhibitor, clade B, member 1b	282663	ENSMUSG00000051029
1428663_at	-0.7356	Sgms2	sphingomyelin synthase 2	74442	ENSMUSG00000050931
1420624_a_at	-0.613	Vamp8	vesicle-associated membrane protein 8	22320	ENSMUSG00000050732
1429213_at	-0.5532	Ndufaf6	NADH dehydrogenase (ubiquinone) complex I, assembly factor 6	76947	ENSMUSG00000050323
1420647_a_at	-0.6883	Krt8	keratin 8	16691	ENSMUSG00000049382
1435989_x_at	-0.5974	Krt8	keratin 8	16691	ENSMUSG00000049382
1423691_x_at	-0.6505	Krt8	keratin 8	16691	ENSMUSG00000049382
1451277_at	-0.7099	Zadh2	zinc binding alcohol dehydrogenase, domain containing 2	225791	ENSMUSG00000049090
1418589_a_at	-0.7075	Mlf1	myeloid leukemia factor 1	17349	ENSMUSG00000048416
1417081_a_at	-0.561	Syngr2	synaptogyrin 2	20973	ENSMUSG00000048277
1457693_a_at	-0.6236	Eno4	enolase 4	226265	ENSMUSG00000048029
1457694_at	-0.6302	Eno4	enolase 4	226265	ENSMUSG00000048029
1431429_a_at	-0.5923	Arl4a	ADP-ribosylation factor-like 4A	11861	ENSMUSG00000047446
1452256_at	-0.5549	1110002N22Rik	RIKEN cDNA 1110002N22 gene	68550	ENSMUSG00000046909
1436590_at	-0.6437	Ppp1r3b	protein phosphatase 1, regulatory (inhibitor) subunit 3B	244416	ENSMUSG00000046794
1436831_at	-0.5846	Iqub	IQ motif and ubiquitin domain containing	214704	ENSMUSG00000046192
1416318_at	-0.6421	Serpinb1a	serine (or cysteine) peptidase inhibitor, clade B, member 1a	66222	ENSMUSG00000044734
1416695_at	-0.6694	Tspo	translocator protein	12257	ENSMUSG00000041736
1456251_x_at	-0.7625	Tspo	translocator protein	12257	ENSMUSG00000041736
1438948_x_at	-0.7676	Tspo	translocator protein	12257	ENSMUSG00000041736
1451405_at	-0.6286	Pcca	propionyl-Coenzyme A carboxylase, alpha polypeptide	110821	ENSMUSG00000041650
1429137_at	-0.5639	Mettl18	methyltransferase like 18	69962	ENSMUSG00000041396
1427040_at	-0.6749	Mdfic	MyoD family inhibitor domain containing	16543	ENSMUSG00000041390
1430781_at	-0.6114	Ak7	adenylate kinase 7	78801	ENSMUSG00000041323
1417814_at	-0.638	Pla2g5	phospholipase A2, group V	18784	ENSMUSG00000041193
1416411_at	-0.7043	Gstm2	glutathione S-transferase, mu 2	14863	ENSMUSG00000040562
1451386_at	-0.5478	Blvrb	biliverdin reductase B (flavin reductase (NADPH))	233016	ENSMUSG00000040466
1418996_a_at	-0.5639	Lyrm5	LYR motif containing 5	67636	ENSMUSG00000040370
1459793_s_at	-0.5716	Lyrm5	LYR motif containing 5	67636	ENSMUSG00000040370
1452585_at	-0.5504	Mrps28	mitochondrial ribosomal protein S28	66230	ENSMUSG00000040269
1434354_at	-0.6671	Maob	monoamine oxidase B	109731	ENSMUSG00000040147
1424756_at	0.5507	Hip1	huntingtin interacting protein 1	215114	ENSMUSG00000039959
1429891_at	-0.7619	Capsl	calcyphosine-like	75568	ENSMUSG00000039676
1449421_a_at	-0.6451	Kcne2	potassium voltage-gated channel, Isk-related subfamily, gene 2	246133	ENSMUSG00000039672
1433847_at	-0.5535	Fam40b	family with sequence similarity 40, member B	320609	ENSMUSG00000039629
1444270_at	-0.7287	Rsph4a	radial spoke head 4 homolog A (Chlamydomonas)	212892	ENSMUSG00000039552
1454159_a_at	-0.6496	Igfbp2	insulin-like growth factor binding protein 2	16008	ENSMUSG00000039323
1431510_s_at	-0.6655	Cmc1	COX assembly mitochondrial protein homolog (S. cerevisiae)	67899	ENSMUSG00000039163
1416441_at	-0.7772	Pgcp	plasma glutamate carboxypeptidase	54381	ENSMUSG00000039007
1450759_at	-0.6593	Bmp6	bone morphogenetic protein 6	12161	ENSMUSG00000039004
1451539_at	-0.6099	Baiap2l1	BAI1-associated protein 2-like 1	66898	ENSMUSG00000038859
1420930_s_at	-0.662	Ctnnal1	catenin (cadherin associated protein), alpha-like 1	54366	ENSMUSG00000038816
1422438_at	-0.7653	Ephx1	epoxide hydrolase 1, microsomal	13849	ENSMUSG00000038776
1417143_at	-0.5431	Lpar1	lysophosphatidic acid receptor 1	14745	ENSMUSG00000038668
1451201_s_at	-0.6534	Rnh1	ribonuclease/angiogenin inhibitor 1	107702	ENSMUSG00000038650
1433761_at	-0.5689	Pde4dip	phosphodiesterase 4D interacting protein (myomegalin)	83679	ENSMUSG00000038170
1437807_x_at	-0.7297	Ctnna1	catenin (cadherin associated protein), alpha 1	12385	ENSMUSG00000037815
1448149_at	-0.6372	Ctnna1	catenin (cadherin associated protein), alpha 1	12385	ENSMUSG00000037815
1417649_at	-0.6322	Cdkn1c	cyclin-dependent kinase inhibitor 1C (P57)	12577	ENSMUSG00000037664
1448489_at	-0.5834	Pafah2	platelet-activating factor acetylhydrolase 2	100163	ENSMUSG00000037366
1418086_at	-0.552	Ppp1r14a	protein phosphatase 1, regulatory (inhibitor) subunit 14A	68458	ENSMUSG00000037166
1428146_s_at	-0.6776	Acaa2	acetyl-Coenzyme A acyltransferase 2 (mitochondrial 3-oxoacyl-Coenzyme A thiolase)	52538	ENSMUSG00000036880
1423254_x_at	-0.6491	Rps27l	ribosomal protein S27-like	67941	ENSMUSG00000036781
1435429_x_at	-0.6516	Rps27l	ribosomal protein S27-like	67941	ENSMUSG00000036781
1450925_a_at	-0.6539	Rps27l	ribosomal protein S27-like	67941	ENSMUSG00000036781
1436285_at	-0.5657	Ccdc113	coiled-coil domain containing 113	244608	ENSMUSG00000036598
1443783_x_at	-0.5453	H2-Aa	histocompatibility 2, class II antigen A, alpha	14960	ENSMUSG00000036594
1435290_x_at	-0.566	H2-Aa	histocompatibility 2, class II antigen A, alpha	14960	ENSMUSG00000036594
1426910_at	-0.5483	Pawr	PRKC, apoptosis, WT1, regulator	114774	ENSMUSG00000035873
1417772_at	-0.6669	Grhpr	glyoxylate reductase/hydroxypyruvate reductase	76238	ENSMUSG00000035637
1452583_s_at	-0.6508	Galm	galactose mutarotase	319625	ENSMUSG00000035473
1424133_at	-0.6257	Tmem98	transmembrane protein 98	103743	ENSMUSG00000035413
1433488_x_at	-0.6333	Gns	glucosamine (N-acetyl)-6-sulfatase	75612	ENSMUSG00000034707
1452127_a_at	-0.5559	Ptpn13	protein tyrosine phosphatase, non-receptor type 13	19249	ENSMUSG00000034573
1428987_at	-0.6182	Dynlrb2	dynein light chain roadblock-type 2	75465	ENSMUSG00000034467
1418774_a_at	-0.5568	Atp7a	ATPase, Cu++ transporting, alpha polypeptide	11977	ENSMUSG00000033792
1436921_at	-0.6531	Atp7a	ATPase, Cu++ transporting, alpha polypeptide	11977	ENSMUSG00000033792
1417883_at	-0.6024	Gstt2	glutathione S-transferase, theta 2	14872	ENSMUSG00000033318
1454862_at	-0.6477	Phldb2	pleckstrin homology-like domain, family B, member 2	208177	ENSMUSG00000033149
1443870_at	-0.5918	Abcc4	ATP-binding cassette, sub-family C (CFTR/MRP), member 4	239273	ENSMUSG00000032849
1450467_at	0.5627	Bsn	bassoon	12217	ENSMUSG00000032589
1430287_s_at	-0.6741	Hemk1	HemK methyltransferase family member 1	69536	ENSMUSG00000032579
1452411_at	-0.6159	Lrrc1	leucine rich repeat containing 1	214345	ENSMUSG00000032352
1416368_at	-0.6398	Gsta4	glutathione S-transferase, alpha 4	14860	ENSMUSG00000032348
1449108_at	-0.5612	Fdx1	ferredoxin 1	14148	ENSMUSG00000032051
1419262_at	-0.6596	Acad8	acyl-Coenzyme A dehydrogenase family, member 8	66948	ENSMUSG00000031969
1419261_at	-0.6081	Acad8	acyl-Coenzyme A dehydrogenase family, member 8	66948	ENSMUSG00000031969
1431302_a_at	-0.6394	Nudt7	nudix (nucleoside diphosphate linked moiety X)-type motif 7	67528	ENSMUSG00000031767
1428136_at	-0.562	Sfrp1	secreted frizzled-related protein 1	20377	ENSMUSG00000031548
1434665_at	-0.6861	Aga	aspartylglucosaminidase	11593	ENSMUSG00000031521
1456388_at	-0.6842	Atp11a	ATPase, class VI, type 11A	50770	ENSMUSG00000031441
1429001_at	-0.6737	Pir	pirin	69656	ENSMUSG00000031379
1460036_at	-0.7054	Ap1s2	adaptor-related protein complex 1, sigma 2 subunit	108012	ENSMUSG00000031367
1438647_x_at	-0.561	Cetn2	centrin 2	26370	ENSMUSG00000031347
1416934_at	-0.5502	Mtm1	X-linked myotubular myopathy gene 1	17772	ENSMUSG00000031337
1438656_x_at	-0.6211	Timm17b	translocase of inner mitochondrial membrane 17b	21855	ENSMUSG00000031158
1434768_at	-0.7117	Tpp1	tripeptidyl peptidase I	12751	ENSMUSG00000030894
1417430_at	-0.7548	Cdr2	cerebellar degeneration-related 2	12585	ENSMUSG00000030878
1431375_s_at	-0.5743	Parva	parvin, alpha	57342	ENSMUSG00000030770
1431805_a_at	-0.6089	Rhpn2	rhophilin, Rho GTPase binding protein 2	52428	ENSMUSG00000030494
1434628_a_at	-0.6353	Rhpn2	rhophilin, Rho GTPase binding protein 2	52428	ENSMUSG00000030494
1434499_a_at	-0.5429	Ldhb	lactate dehydrogenase B	16832	ENSMUSG00000030246
1438659_x_at	-0.5956	Chchd6	coiled-coil-helix-coiled-coil-helix domain containing 6	66098	ENSMUSG00000030086
1452823_at	-0.8047	Gstk1	glutathione S-transferase kappa 1	76263	ENSMUSG00000029864
1437687_x_at	-0.6699	Fkbp9	FK506 binding protein 9	27055	ENSMUSG00000029781
1423523_at	-0.6508	Aass	aminoadipate-semialdehyde synthase	30956	ENSMUSG00000029695
1423224_at	-0.6851	Tctn2	tectonic family member 2	67978	ENSMUSG00000029386
1434731_x_at	-0.6627	Prdx1	peroxiredoxin 1	18477	ENSMUSG00000028691
1416000_a_at	-0.5776	Prdx1	peroxiredoxin 1	18477	ENSMUSG00000028691
1436691_x_at	-0.5792	Prdx1	peroxiredoxin 1	18477	ENSMUSG00000028691
1433866_x_at	-0.6708	Prdx1	peroxiredoxin 1	18477	ENSMUSG00000028691
1443849_x_at	-0.5832	Urod	uroporphyrinogen decarboxylase	22275	ENSMUSG00000028684
1427938_at	-0.6809	Mycbp	c-myc binding protein	56309	ENSMUSG00000028647
1452608_at	-0.5979	Mycbp	c-myc binding protein	56309	ENSMUSG00000028647
1427939_s_at	-0.5748	Mycbp	c-myc binding protein	56309	ENSMUSG00000028647
1416772_at	-0.7366	Cpt2	carnitine palmitoyltransferase 2	12896	ENSMUSG00000028607
1425196_a_at	-0.5722	Hint2	histidine triad nucleotide binding protein 2	68917	ENSMUSG00000028470
1429471_at	-0.5705	1110017D15Rik	RIKEN cDNA 1110017D15 gene	73721	ENSMUSG00000028441
1419367_at	-0.6712	Decr1	2,4-dienoyl CoA reductase 1, mitochondrial	67460	ENSMUSG00000028223
1423824_at	-0.6422	Wls	wntless homolog (Drosophila)	68151	ENSMUSG00000028173
1455972_x_at	-0.5904	Hadh	hydroxyacyl-Coenzyme A dehydrogenase	15107	ENSMUSG00000027984
1436390_a_at	-0.5649	Clcc1	chloride channel CLIC-like 1	229725	ENSMUSG00000027884
1435058_x_at	-0.6234	Stxbp3a	syntaxin binding protein 3A	20912	ENSMUSG00000027882
1451536_at	-0.5558	Mtfr1	mitochondrial fission regulator 1	67472	ENSMUSG00000027601
1454713_s_at	-0.5852	Hdc	histidine decarboxylase	15186	ENSMUSG00000027360
1416430_at	-0.5913	Cat	catalase	12359	ENSMUSG00000027187
1419551_s_at	-0.6846	Stk39	serine/threonine kinase 39	53416	ENSMUSG00000027030
1423613_at	-0.6012	Ssfa2	sperm specific antigen 2	70599	ENSMUSG00000027007
1426812_a_at	-0.5536	Fam129b	family with sequence similarity 129, member B	227737	ENSMUSG00000026796
1460194_at	-0.5721	Phyh	phytanoyl-CoA hydroxylase	16922	ENSMUSG00000026664
1449269_at	-0.6798	F5	coagulation factor V	14067	ENSMUSG00000026579
1418907_at	-0.6835	F5	coagulation factor V	14067	ENSMUSG00000026579
1428619_at	-0.6146	Fam36a	family with sequence similarity 36, member A	66359	ENSMUSG00000026500
1448910_at	-0.5795	Pecr	peroxisomal trans-2-enoyl-CoA reductase	111175	ENSMUSG00000026189
1423261_at	-0.6734	1500015O10Rik	RIKEN cDNA 1500015O10 gene	78896	ENSMUSG00000026051
1460049_s_at	-0.6571	1500015O10Rik	RIKEN cDNA 1500015O10 gene	78896	ENSMUSG00000026051
1416547_at	-0.5491	Ndufb3	NADH dehydrogenase (ubiquinone) 1 beta subcomplex 3	66495	ENSMUSG00000026032
1428487_s_at	-0.5514	Coq10b	coenzyme Q10 homolog B (S. cerevisiae)	67876	ENSMUSG00000025981
1426968_a_at	-0.5417	Rdh10	retinol dehydrogenase 10 (all-trans)	98711	ENSMUSG00000025921
1420919_at	-0.5685	Sgk3	serum/glucocorticoid regulated kinase 3	170755	ENSMUSG00000025915
1421014_a_at	-0.5595	Clybl	citrate lyase beta like	69634	ENSMUSG00000025545
1418384_at	-0.6871	Apool	apolipoprotein O-like	68117	ENSMUSG00000025525
1449218_at	-0.5903	Cox8b	cytochrome c oxidase, subunit VIIIb	12869	ENSMUSG00000025488
1424235_at	-0.6265	Ormdl2	ORM1-like 2 (S. cerevisiae)	66844	ENSMUSG00000025353
1418808_at	-0.6555	Rdh5	retinol dehydrogenase 5	19682	ENSMUSG00000025350
1435731_x_at	-0.5604	Prdx4	peroxiredoxin 4	53381	ENSMUSG00000025289
1416166_a_at	-0.6828	Prdx4	peroxiredoxin 4	53381	ENSMUSG00000025289
1416167_at	-0.6844	Prdx4	peroxiredoxin 4	53381	ENSMUSG00000025289
1438391_x_at	-0.6344	Hsd17b10	hydroxysteroid (17-beta) dehydrogenase 10	15108	ENSMUSG00000025260
1441022_at	-0.6132	Arih1	ariadne ubiquitin-conjugating enzyme E2 binding protein homolog 1 (Drosophila)	23806	ENSMUSG00000025234
1434866_x_at	-0.6328	Cpt1a	carnitine palmitoyltransferase 1a, liver	12894	ENSMUSG00000024900
1450726_at	-0.6604	Asah2	N-acylsphingosine amidohydrolase 2	54447	ENSMUSG00000024887
1417354_at	-0.6503	Sil1	endoplasmic reticulum chaperone SIL1 homolog (S. cerevisiae)	81500	ENSMUSG00000024357
1453139_at	-0.6135	Nudt12	nudix (nucleoside diphosphate linked moiety X)-type motif 12	67993	ENSMUSG00000024228
1424763_at	-0.6702	Rsph9	radial spoke head 9 homolog (Chlamydomonas)	75564	ENSMUSG00000023966
1449041_a_at	-0.6956	Trip6	thyroid hormone receptor interactor 6	22051	ENSMUSG00000023348
1449409_at	-0.5651	Sult1c2	sulfotransferase family, cytosolic, 1C, member 2	69083	ENSMUSG00000023122
1452233_at	-0.6058	Abcc1	ATP-binding cassette, sub-family C (CFTR/MRP), member 1	17250	ENSMUSG00000023088
1448169_at	-0.5736	Krt18	keratin 18	16668	ENSMUSG00000023043
1454866_s_at	-0.6644	Clic6	chloride intracellular channel 6	209195	ENSMUSG00000022949
1434165_at	-0.6019	Clic6	chloride intracellular channel 6	209195	ENSMUSG00000022949
1418372_at	-0.5594	Adsl	adenylosuccinate lyase	11564	ENSMUSG00000022407
1418976_s_at	-0.5563	Cideb	cell death-inducing DNA fragmentation factor, alpha subunit-like effector B	12684	ENSMUSG00000022219
1416910_at	-0.5888	Dnajc15	DnaJ (Hsp40) homolog, subfamily C, member 15	66148	ENSMUSG00000022013
1454656_at	-0.5625	Spata13	spermatogenesis associated 13	219140	ENSMUSG00000021990
1449047_at	-0.5638	Hacl1	2-hydroxyacyl-CoA lyase 1	56794	ENSMUSG00000021884
1425926_a_at	-0.6449	Otx2	orthodenticle homolog 2 (Drosophila)	18424	ENSMUSG00000021848
1440354_at	-0.5999	Elovl7	ELOVL family member 7, elongation of long chain fatty acids (yeast)	74559	ENSMUSG00000021696
1440312_at	-0.6486	Elovl7	ELOVL family member 7, elongation of long chain fatty acids (yeast)	74559	ENSMUSG00000021696
1441091_at	-0.7136	Elovl7	ELOVL family member 7, elongation of long chain fatty acids (yeast)	74559	ENSMUSG00000021696
1448873_at	-0.574	Ocln	occludin	18260	ENSMUSG00000021638
1435972_at	-0.5982	Cast	calpastatin	12380	ENSMUSG00000021585
1416027_at	-0.5493	Pdcd6	programmed cell death 6	18570	ENSMUSG00000021576
1455746_at	-0.6482	Kif13a	kinesin family member 13A	16553	ENSMUSG00000021375
1439462_x_at	-0.6394	Tmed10	transmembrane emp24-like trafficking protein 10 (yeast)	68581	ENSMUSG00000021248
1439444_x_at	-0.6591	Tmed10	transmembrane emp24-like trafficking protein 10 (yeast)	68581	ENSMUSG00000021248
1454688_x_at	-0.6637	Tmed10	transmembrane emp24-like trafficking protein 10 (yeast)	68581	ENSMUSG00000021248
1448513_a_at	-0.648	Npc2	Niemann Pick type C2	67963	ENSMUSG00000021242
1416901_at	-0.6563	Npc2	Niemann Pick type C2	67963	ENSMUSG00000021242
1415917_at	-0.5853	Mthfd1	methylenetetrahydrofolate dehydrogenase (NADP+ dependent), methenyltetrahydrofolate cyclohydrolase, formyltetrahydrofolate synthase	108156	ENSMUSG00000021048
1415916_a_at	-0.5683	Mthfd1	methylenetetrahydrofolate dehydrogenase (NADP+ dependent), methenyltetrahydrofolate cyclohydrolase, formyltetrahydrofolate synthase	108156	ENSMUSG00000021048
1428554_a_at	-0.5484	Slirp	SRA stem-loop interacting RNA binding protein	380773	ENSMUSG00000021040
1429552_at	-0.592	Wdr16	WD repeat domain 16	71860	ENSMUSG00000020904
1422465_a_at	-0.6082	Nxn	nucleoredoxin	18230	ENSMUSG00000020844
1426715_s_at	-0.632	Slc46a1	solute carrier family 46, member 1	52466	ENSMUSG00000020829
1434432_at	-0.5855	Rffl	ring finger and FYVE like domain containing protein	67338	ENSMUSG00000020696
1452277_at	-0.8142	Arsg	arylsulfatase G	74008	ENSMUSG00000020604
1427002_s_at	-0.718	Arsg	arylsulfatase G	74008	ENSMUSG00000020604
1437279_x_at	-0.552	Sdc1	syndecan 1	20969	ENSMUSG00000020592
1451117_a_at	-0.5442	Tom1l1	target of myb1-like 1 (chicken)	71943	ENSMUSG00000020541
1426690_a_at	-0.5595	Srebf1	sterol regulatory element binding transcription factor 1	20787	ENSMUSG00000020538
1448562_at	-0.647	Upp1	uridine phosphorylase 1	22271	ENSMUSG00000020407
1444186_at	0.5578	Agxt2l2	alanine-glyoxylate aminotransferase 2-like 2	72947	ENSMUSG00000020359
1416060_at	-0.5509	Tbc1d15	TBC1 domain family, member 15	66687	ENSMUSG00000020130
1429065_at	-0.6037	Ikbip	IKBKB interacting protein	67454	ENSMUSG00000019975
1437208_at	-0.6401	42257	septin 10	103080	ENSMUSG00000019917
1416271_at	-0.555	Perp	PERP, TP53 apoptosis effector	64058	ENSMUSG00000019851
1418106_at	-0.5979	Hey2	hairy/enhancer-of-split related with YRPW motif 2	15214	ENSMUSG00000019789
1424184_at	-0.6235	Acadvl	acyl-Coenzyme A dehydrogenase, very long chain	11370	ENSMUSG00000018574
1422186_s_at	-0.5488	Cyb5r3	cytochrome b5 reductase 3	109754	ENSMUSG00000018042
1459770_at	-0.6639	Taok1	TAO kinase 1	216965	ENSMUSG00000017291
1436319_at	-0.6776	Sulf1	sulfatase 1	240725	ENSMUSG00000016918
1438200_at	-0.6728	Sulf1	sulfatase 1	240725	ENSMUSG00000016918
1428094_at	-0.6077	Lamp2	lysosomal-associated membrane protein 2	16784	ENSMUSG00000016534
1434503_s_at	-0.6937	Lamp2	lysosomal-associated membrane protein 2	16784	ENSMUSG00000016534
1416344_at	-0.7748	Lamp2	lysosomal-associated membrane protein 2	16784	ENSMUSG00000016534
1417869_s_at	-0.611	Ctsz	cathepsin Z	64138	ENSMUSG00000016256
1455435_s_at	-0.5972	Chdh	choline dehydrogenase	218865	ENSMUSG00000015970
1452637_a_at	-0.5962	Bola1	bolA-like 1 (E. coli)	69168	ENSMUSG00000015943
1416543_at	-0.5965	Nfe2l2	nuclear factor, erythroid derived 2, like 2	18024	ENSMUSG00000015839
1423955_a_at	-0.5812	Lass2	LAG1 homolog, ceramide synthase 2	76893	ENSMUSG00000015714
1438773_at	-0.6775	Steap2	six transmembrane epithelial antigen of prostate 2	74051	ENSMUSG00000015653
1444290_at	-0.5606	Steap2	six transmembrane epithelial antigen of prostate 2	74051	ENSMUSG00000015653
1446071_at	-0.6398	Steap2	six transmembrane epithelial antigen of prostate 2	74051	ENSMUSG00000015653
1442359_at	-0.5785	Steap2	six transmembrane epithelial antigen of prostate 2	74051	ENSMUSG00000015653
1428636_at	-0.6549	Steap2	six transmembrane epithelial antigen of prostate 2	74051	ENSMUSG00000015653
1424938_at	-0.6734	Steap1	six transmembrane epithelial antigen of the prostate 1	70358	ENSMUSG00000015652
1449383_at	-0.638	Adssl1	adenylosuccinate synthetase like 1	11565	ENSMUSG00000011148
1442542_at	-0.5422	Eya4	eyes absent 4 homolog (Drosophila)	14051	ENSMUSG00000010461
1428460_at	0.5534	Syn2	synapsin II	20965	ENSMUSG00000009394
1415897_a_at	-0.7644	Mgst1	microsomal glutathione S-transferase 1	56615	ENSMUSG00000008540
1432494_a_at	-0.6226	Ift43	intraflagellar transport 43 homolog (Chlamydomonas)	76411	ENSMUSG00000007867
1416689_at	-0.5552	Tuft1	tuftelin 1	22156	ENSMUSG00000005968
1420641_a_at	-0.6837	Sqrdl	sulfide quinone reductase-like (yeast)	59010	ENSMUSG00000005803
1418488_s_at	-0.6074	Ripk4	receptor-interacting serine-threonine kinase 4	72388	ENSMUSG00000005251
1422506_a_at	-0.6353	Cstb	cystatin B	13014	ENSMUSG00000005054
1416203_at	-0.6721	Aqp1	aquaporin 1	11826	ENSMUSG00000004655
1428181_at	-0.6206	Etfb	electron transferring flavoprotein, beta polypeptide	110826	ENSMUSG00000004610
1423627_at	-0.675	Nqo1	NAD(P)H dehydrogenase, quinone 1	18104	ENSMUSG00000003849
1430135_at	-0.6426	Dnase2a	deoxyribonuclease II alpha	13423	ENSMUSG00000003812
1418697_at	-0.6428	Inmt	indolethylamine N-methyltransferase	21743	ENSMUSG00000003477
1424753_at	-0.588	Nudt14	nudix (nucleoside diphosphate linked moiety X)-type motif 14	66174	ENSMUSG00000002804
1416590_a_at	-0.5453	Rab34	RAB34, member of RAS oncogene family	19376	ENSMUSG00000002059
1416591_at	-0.5514	Rab34	RAB34, member of RAS oncogene family	19376	ENSMUSG00000002059
1417635_at	-0.6234	Spa17	sperm autoantigenic protein 17	20686	ENSMUSG00000001948
1417103_at	-0.5908	Ddt	D-dopachrome tautomerase	13202	ENSMUSG00000001666
1418186_at	-0.7652	Gstt1	glutathione S-transferase, theta 1	14871	ENSMUSG00000001663
1456590_x_at	-0.6204	Akr1b3	aldo-keto reductase family 1, member B3 (aldose reductase)	11677	ENSMUSG00000001642
1437133_x_at	-0.5672	Akr1b3	aldo-keto reductase family 1, member B3 (aldose reductase)	11677	ENSMUSG00000001642
1448319_at	-0.55	Akr1b3	aldo-keto reductase family 1, member B3 (aldose reductase)	11677	ENSMUSG00000001642
1418986_a_at	-0.6581	Uxt	ubiquitously expressed transcript	22294	ENSMUSG00000001134
1417596_at	-0.5548	B9d1	B9 protein domain 1	27078	ENSMUSG00000001039
1434037_s_at	-0.6105	Kat2b	K(lysine) acetyltransferase 2B	18519	ENSMUSG00000000708
1418412_at	-0.5582	Tpd52l1	tumor protein D52-like 1	21987	ENSMUSG00000000296
cellular component::mitochondrial inner membrane::GO:0005743
C=312;O=23;E=6.89;R=3.34;rawP=4.91e-07;adjP=3.32e-05
Probe Set	r (hipPC1)	Symbol	Name	Entrez ID	Ensemble Gene ID
1420641_a_at	-0.6837	Sqrdl	sulfide quinone reductase-like (yeast)	59010	ENSMUSG00000005803
1415897_a_at	-0.7644	Mgst1	microsomal glutathione S-transferase 1	56615	ENSMUSG00000008540
1455435_s_at	-0.5972	Chdh	choline dehydrogenase	218865	ENSMUSG00000015970
1422186_s_at	-0.5488	Cyb5r3	cytochrome b5 reductase 3	109754	ENSMUSG00000018042
1424184_at	-0.6235	Acadvl	acyl-Coenzyme A dehydrogenase, very long chain	11370	ENSMUSG00000018574
1434866_x_at	-0.6328	Cpt1a	carnitine palmitoyltransferase 1a, liver	12894	ENSMUSG00000024900
1438391_x_at	-0.6344	Hsd17b10	hydroxysteroid (17-beta) dehydrogenase 10	15108	ENSMUSG00000025260
1449218_at	-0.5903	Cox8b	cytochrome c oxidase, subunit VIIIb	12869	ENSMUSG00000025488
1418384_at	-0.6871	Apool	apolipoprotein O-like	68117	ENSMUSG00000025525
1428487_s_at	-0.5514	Coq10b	coenzyme Q10 homolog B (S. cerevisiae)	67876	ENSMUSG00000025981
1416547_at	-0.5491	Ndufb3	NADH dehydrogenase (ubiquinone) 1 beta subcomplex 3	66495	ENSMUSG00000026032
1455972_x_at	-0.5904	Hadh	hydroxyacyl-Coenzyme A dehydrogenase	15107	ENSMUSG00000027984
1416772_at	-0.7366	Cpt2	carnitine palmitoyltransferase 2	12896	ENSMUSG00000028607
1452823_at	-0.8047	Gstk1	glutathione S-transferase kappa 1	76263	ENSMUSG00000029864
1438659_x_at	-0.5956	Chchd6	coiled-coil-helix-coiled-coil-helix domain containing 6	66098	ENSMUSG00000030086
1438656_x_at	-0.6211	Timm17b	translocase of inner mitochondrial membrane 17b	21855	ENSMUSG00000031158
1449108_at	-0.5612	Fdx1	ferredoxin 1	14148	ENSMUSG00000032051
1428146_s_at	-0.6776	Acaa2	acetyl-Coenzyme A acyltransferase 2 (mitochondrial 3-oxoacyl-Coenzyme A thiolase)	52538	ENSMUSG00000036880
1434354_at	-0.6671	Maob	monoamine oxidase B	109731	ENSMUSG00000040147
1429213_at	-0.5532	Ndufaf6	NADH dehydrogenase (ubiquinone) complex I, assembly factor 6	76947	ENSMUSG00000050323
1435275_at	-0.6163	Cox6b2	cytochrome c oxidase subunit VIb polypeptide 2	333182	ENSMUSG00000051811
1437172_x_at	-0.5887	Hadhb	hydroxyacyl-Coenzyme A dehydrogenase/3-ketoacyl-Coenzyme A thiolase/enoyl-Coenzyme A hydratase (trifunctional protein), beta subunit	231086	ENSMUSG00000059447
1418709_at	-0.6463	Cox7a1	cytochrome c oxidase, subunit VIIa 1	12865	ENSMUSG00000074218
cellular component::cytoplasmic part::GO:0044444
C=5198;O=159;E=114.86;R=1.38;rawP=7.43e-07;adjP=3.77e-05
Probe Set	r (hipPC1)	Symbol	Name	Entrez ID	Ensemble Gene ID
1456204_at	-0.6171	2010107H07Rik	RIKEN cDNA 2010107H07 gene	66487	NULL
1422614_s_at	-0.6642	Bloc1s1	biogenesis of lysosome-related organelles complex-1, subunit 1	14533	ENSMUSG00000090247
1418709_at	-0.6463	Cox7a1	cytochrome c oxidase, subunit VIIa 1	12865	ENSMUSG00000074218
1419595_a_at	-0.6117	Ggh	gamma-glutamyl hydrolase	14590	ENSMUSG00000073987
1433503_at	-0.6016	Ptgr2	prostaglandin reductase 2	77219	ENSMUSG00000072946
1453156_s_at	-0.5622	Ptgr2	prostaglandin reductase 2	77219	ENSMUSG00000072946
1434702_at	-0.5492	Ddrgk1	DDRGK domain containing 1	77006	ENSMUSG00000068290
1426323_x_at	-0.5542	Siva1	SIVA1, apoptosis-inducing factor	30954	ENSMUSG00000064326
1451139_at	-0.6041	Slc39a4	solute carrier family 39 (zinc transporter), member 4	72027	ENSMUSG00000063354
1420485_at	-0.5726	Nol7	nucleolar protein 7	70078	ENSMUSG00000063200
1455083_at	-0.5691	Atp11c	ATPase, class VI, type 11C	320940	ENSMUSG00000062949
1415984_at	-0.5903	Acadm	acyl-Coenzyme A dehydrogenase, medium chain	11364	ENSMUSG00000062908
1437172_x_at	-0.5887	Hadhb	hydroxyacyl-Coenzyme A dehydrogenase/3-ketoacyl-Coenzyme A thiolase/enoyl-Coenzyme A hydratase (trifunctional protein), beta subunit	231086	ENSMUSG00000059447
1427282_a_at	-0.573	Fxn	frataxin	14297	ENSMUSG00000059363
1421938_at	-0.6774	Serhl	serine hydrolase-like	68607	ENSMUSG00000058586
1427889_at	0.7039	Spna2	spectrin alpha 2	20740	ENSMUSG00000057738
1417962_s_at	-0.5639	Ghr	growth hormone receptor	14600	ENSMUSG00000055737
1448491_at	-0.6609	Ech1	enoyl coenzyme A hydratase 1, peroxisomal	51798	ENSMUSG00000053898
1417083_at	-0.5695	Sec61b	Sec61 beta subunit	66212	ENSMUSG00000053317
1435275_at	-0.6163	Cox6b2	cytochrome c oxidase subunit VIb polypeptide 2	333182	ENSMUSG00000051811
1428663_at	-0.7356	Sgms2	sphingomyelin synthase 2	74442	ENSMUSG00000050931
1420624_a_at	-0.613	Vamp8	vesicle-associated membrane protein 8	22320	ENSMUSG00000050732
1429213_at	-0.5532	Ndufaf6	NADH dehydrogenase (ubiquinone) complex I, assembly factor 6	76947	ENSMUSG00000050323
1420647_a_at	-0.6883	Krt8	keratin 8	16691	ENSMUSG00000049382
1435989_x_at	-0.5974	Krt8	keratin 8	16691	ENSMUSG00000049382
1423691_x_at	-0.6505	Krt8	keratin 8	16691	ENSMUSG00000049382
1451277_at	-0.7099	Zadh2	zinc binding alcohol dehydrogenase, domain containing 2	225791	ENSMUSG00000049090
1417081_a_at	-0.561	Syngr2	synaptogyrin 2	20973	ENSMUSG00000048277
1457693_a_at	-0.6236	Eno4	enolase 4	226265	ENSMUSG00000048029
1457694_at	-0.6302	Eno4	enolase 4	226265	ENSMUSG00000048029
1452256_at	-0.5549	1110002N22Rik	RIKEN cDNA 1110002N22 gene	68550	ENSMUSG00000046909
1436590_at	-0.6437	Ppp1r3b	protein phosphatase 1, regulatory (inhibitor) subunit 3B	244416	ENSMUSG00000046794
1436831_at	-0.5846	Iqub	IQ motif and ubiquitin domain containing	214704	ENSMUSG00000046192
1416695_at	-0.6694	Tspo	translocator protein	12257	ENSMUSG00000041736
1456251_x_at	-0.7625	Tspo	translocator protein	12257	ENSMUSG00000041736
1438948_x_at	-0.7676	Tspo	translocator protein	12257	ENSMUSG00000041736
1451405_at	-0.6286	Pcca	propionyl-Coenzyme A carboxylase, alpha polypeptide	110821	ENSMUSG00000041650
1427040_at	-0.6749	Mdfic	MyoD family inhibitor domain containing	16543	ENSMUSG00000041390
1417814_at	-0.638	Pla2g5	phospholipase A2, group V	18784	ENSMUSG00000041193
1451386_at	-0.5478	Blvrb	biliverdin reductase B (flavin reductase (NADPH))	233016	ENSMUSG00000040466
1418996_a_at	-0.5639	Lyrm5	LYR motif containing 5	67636	ENSMUSG00000040370
1459793_s_at	-0.5716	Lyrm5	LYR motif containing 5	67636	ENSMUSG00000040370
1452585_at	-0.5504	Mrps28	mitochondrial ribosomal protein S28	66230	ENSMUSG00000040269
1434354_at	-0.6671	Maob	monoamine oxidase B	109731	ENSMUSG00000040147
1424756_at	0.5507	Hip1	huntingtin interacting protein 1	215114	ENSMUSG00000039959
1449421_a_at	-0.6451	Kcne2	potassium voltage-gated channel, Isk-related subfamily, gene 2	246133	ENSMUSG00000039672
1454159_a_at	-0.6496	Igfbp2	insulin-like growth factor binding protein 2	16008	ENSMUSG00000039323
1431510_s_at	-0.6655	Cmc1	COX assembly mitochondrial protein homolog (S. cerevisiae)	67899	ENSMUSG00000039163
1416441_at	-0.7772	Pgcp	plasma glutamate carboxypeptidase	54381	ENSMUSG00000039007
1451539_at	-0.6099	Baiap2l1	BAI1-associated protein 2-like 1	66898	ENSMUSG00000038859
1420930_s_at	-0.662	Ctnnal1	catenin (cadherin associated protein), alpha-like 1	54366	ENSMUSG00000038816
1422438_at	-0.7653	Ephx1	epoxide hydrolase 1, microsomal	13849	ENSMUSG00000038776
1433761_at	-0.5689	Pde4dip	phosphodiesterase 4D interacting protein (myomegalin)	83679	ENSMUSG00000038170
1437807_x_at	-0.7297	Ctnna1	catenin (cadherin associated protein), alpha 1	12385	ENSMUSG00000037815
1448149_at	-0.6372	Ctnna1	catenin (cadherin associated protein), alpha 1	12385	ENSMUSG00000037815
1428146_s_at	-0.6776	Acaa2	acetyl-Coenzyme A acyltransferase 2 (mitochondrial 3-oxoacyl-Coenzyme A thiolase)	52538	ENSMUSG00000036880
1423254_x_at	-0.6491	Rps27l	ribosomal protein S27-like	67941	ENSMUSG00000036781
1435429_x_at	-0.6516	Rps27l	ribosomal protein S27-like	67941	ENSMUSG00000036781
1450925_a_at	-0.6539	Rps27l	ribosomal protein S27-like	67941	ENSMUSG00000036781
1443783_x_at	-0.5453	H2-Aa	histocompatibility 2, class II antigen A, alpha	14960	ENSMUSG00000036594
1435290_x_at	-0.566	H2-Aa	histocompatibility 2, class II antigen A, alpha	14960	ENSMUSG00000036594
1417772_at	-0.6669	Grhpr	glyoxylate reductase/hydroxypyruvate reductase	76238	ENSMUSG00000035637
1424133_at	-0.6257	Tmem98	transmembrane protein 98	103743	ENSMUSG00000035413
1433488_x_at	-0.6333	Gns	glucosamine (N-acetyl)-6-sulfatase	75612	ENSMUSG00000034707
1428987_at	-0.6182	Dynlrb2	dynein light chain roadblock-type 2	75465	ENSMUSG00000034467
1418774_a_at	-0.5568	Atp7a	ATPase, Cu++ transporting, alpha polypeptide	11977	ENSMUSG00000033792
1436921_at	-0.6531	Atp7a	ATPase, Cu++ transporting, alpha polypeptide	11977	ENSMUSG00000033792
1417883_at	-0.6024	Gstt2	glutathione S-transferase, theta 2	14872	ENSMUSG00000033318
1443870_at	-0.5918	Abcc4	ATP-binding cassette, sub-family C (CFTR/MRP), member 4	239273	ENSMUSG00000032849
1430287_s_at	-0.6741	Hemk1	HemK methyltransferase family member 1	69536	ENSMUSG00000032579
1416368_at	-0.6398	Gsta4	glutathione S-transferase, alpha 4	14860	ENSMUSG00000032348
1449108_at	-0.5612	Fdx1	ferredoxin 1	14148	ENSMUSG00000032051
1419262_at	-0.6596	Acad8	acyl-Coenzyme A dehydrogenase family, member 8	66948	ENSMUSG00000031969
1419261_at	-0.6081	Acad8	acyl-Coenzyme A dehydrogenase family, member 8	66948	ENSMUSG00000031969
1431302_a_at	-0.6394	Nudt7	nudix (nucleoside diphosphate linked moiety X)-type motif 7	67528	ENSMUSG00000031767
1428136_at	-0.562	Sfrp1	secreted frizzled-related protein 1	20377	ENSMUSG00000031548
1434665_at	-0.6861	Aga	aspartylglucosaminidase	11593	ENSMUSG00000031521
1456388_at	-0.6842	Atp11a	ATPase, class VI, type 11A	50770	ENSMUSG00000031441
1460036_at	-0.7054	Ap1s2	adaptor-related protein complex 1, sigma 2 subunit	108012	ENSMUSG00000031367
1438647_x_at	-0.561	Cetn2	centrin 2	26370	ENSMUSG00000031347
1416934_at	-0.5502	Mtm1	X-linked myotubular myopathy gene 1	17772	ENSMUSG00000031337
1438656_x_at	-0.6211	Timm17b	translocase of inner mitochondrial membrane 17b	21855	ENSMUSG00000031158
1434768_at	-0.7117	Tpp1	tripeptidyl peptidase I	12751	ENSMUSG00000030894
1434499_a_at	-0.5429	Ldhb	lactate dehydrogenase B	16832	ENSMUSG00000030246
1438659_x_at	-0.5956	Chchd6	coiled-coil-helix-coiled-coil-helix domain containing 6	66098	ENSMUSG00000030086
1452823_at	-0.8047	Gstk1	glutathione S-transferase kappa 1	76263	ENSMUSG00000029864
1437687_x_at	-0.6699	Fkbp9	FK506 binding protein 9	27055	ENSMUSG00000029781
1423523_at	-0.6508	Aass	aminoadipate-semialdehyde synthase	30956	ENSMUSG00000029695
1434731_x_at	-0.6627	Prdx1	peroxiredoxin 1	18477	ENSMUSG00000028691
1416000_a_at	-0.5776	Prdx1	peroxiredoxin 1	18477	ENSMUSG00000028691
1436691_x_at	-0.5792	Prdx1	peroxiredoxin 1	18477	ENSMUSG00000028691
1433866_x_at	-0.6708	Prdx1	peroxiredoxin 1	18477	ENSMUSG00000028691
1443849_x_at	-0.5832	Urod	uroporphyrinogen decarboxylase	22275	ENSMUSG00000028684
1427938_at	-0.6809	Mycbp	c-myc binding protein	56309	ENSMUSG00000028647
1452608_at	-0.5979	Mycbp	c-myc binding protein	56309	ENSMUSG00000028647
1427939_s_at	-0.5748	Mycbp	c-myc binding protein	56309	ENSMUSG00000028647
1416772_at	-0.7366	Cpt2	carnitine palmitoyltransferase 2	12896	ENSMUSG00000028607
1425196_a_at	-0.5722	Hint2	histidine triad nucleotide binding protein 2	68917	ENSMUSG00000028470
1429471_at	-0.5705	1110017D15Rik	RIKEN cDNA 1110017D15 gene	73721	ENSMUSG00000028441
1419367_at	-0.6712	Decr1	2,4-dienoyl CoA reductase 1, mitochondrial	67460	ENSMUSG00000028223
1423824_at	-0.6422	Wls	wntless homolog (Drosophila)	68151	ENSMUSG00000028173
1455972_x_at	-0.5904	Hadh	hydroxyacyl-Coenzyme A dehydrogenase	15107	ENSMUSG00000027984
1436390_a_at	-0.5649	Clcc1	chloride channel CLIC-like 1	229725	ENSMUSG00000027884
1435058_x_at	-0.6234	Stxbp3a	syntaxin binding protein 3A	20912	ENSMUSG00000027882
1451536_at	-0.5558	Mtfr1	mitochondrial fission regulator 1	67472	ENSMUSG00000027601
1454713_s_at	-0.5852	Hdc	histidine decarboxylase	15186	ENSMUSG00000027360
1416430_at	-0.5913	Cat	catalase	12359	ENSMUSG00000027187
1426812_a_at	-0.5536	Fam129b	family with sequence similarity 129, member B	227737	ENSMUSG00000026796
1460194_at	-0.5721	Phyh	phytanoyl-CoA hydroxylase	16922	ENSMUSG00000026664
1449269_at	-0.6798	F5	coagulation factor V	14067	ENSMUSG00000026579
1418907_at	-0.6835	F5	coagulation factor V	14067	ENSMUSG00000026579
1428619_at	-0.6146	Fam36a	family with sequence similarity 36, member A	66359	ENSMUSG00000026500
1448910_at	-0.5795	Pecr	peroxisomal trans-2-enoyl-CoA reductase	111175	ENSMUSG00000026189
1423261_at	-0.6734	1500015O10Rik	RIKEN cDNA 1500015O10 gene	78896	ENSMUSG00000026051
1460049_s_at	-0.6571	1500015O10Rik	RIKEN cDNA 1500015O10 gene	78896	ENSMUSG00000026051
1416547_at	-0.5491	Ndufb3	NADH dehydrogenase (ubiquinone) 1 beta subcomplex 3	66495	ENSMUSG00000026032
1428487_s_at	-0.5514	Coq10b	coenzyme Q10 homolog B (S. cerevisiae)	67876	ENSMUSG00000025981
1426968_a_at	-0.5417	Rdh10	retinol dehydrogenase 10 (all-trans)	98711	ENSMUSG00000025921
1420919_at	-0.5685	Sgk3	serum/glucocorticoid regulated kinase 3	170755	ENSMUSG00000025915
1421014_a_at	-0.5595	Clybl	citrate lyase beta like	69634	ENSMUSG00000025545
1418384_at	-0.6871	Apool	apolipoprotein O-like	68117	ENSMUSG00000025525
1449218_at	-0.5903	Cox8b	cytochrome c oxidase, subunit VIIIb	12869	ENSMUSG00000025488
1424235_at	-0.6265	Ormdl2	ORM1-like 2 (S. cerevisiae)	66844	ENSMUSG00000025353
1418808_at	-0.6555	Rdh5	retinol dehydrogenase 5	19682	ENSMUSG00000025350
1435731_x_at	-0.5604	Prdx4	peroxiredoxin 4	53381	ENSMUSG00000025289
1416166_a_at	-0.6828	Prdx4	peroxiredoxin 4	53381	ENSMUSG00000025289
1416167_at	-0.6844	Prdx4	peroxiredoxin 4	53381	ENSMUSG00000025289
1438391_x_at	-0.6344	Hsd17b10	hydroxysteroid (17-beta) dehydrogenase 10	15108	ENSMUSG00000025260
1434866_x_at	-0.6328	Cpt1a	carnitine palmitoyltransferase 1a, liver	12894	ENSMUSG00000024900
1450726_at	-0.6604	Asah2	N-acylsphingosine amidohydrolase 2	54447	ENSMUSG00000024887
1417354_at	-0.6503	Sil1	endoplasmic reticulum chaperone SIL1 homolog (S. cerevisiae)	81500	ENSMUSG00000024357
1453139_at	-0.6135	Nudt12	nudix (nucleoside diphosphate linked moiety X)-type motif 12	67993	ENSMUSG00000024228
1449409_at	-0.5651	Sult1c2	sulfotransferase family, cytosolic, 1C, member 2	69083	ENSMUSG00000023122
1452233_at	-0.6058	Abcc1	ATP-binding cassette, sub-family C (CFTR/MRP), member 1	17250	ENSMUSG00000023088
1448169_at	-0.5736	Krt18	keratin 18	16668	ENSMUSG00000023043
1418372_at	-0.5594	Adsl	adenylosuccinate lyase	11564	ENSMUSG00000022407
1418976_s_at	-0.5563	Cideb	cell death-inducing DNA fragmentation factor, alpha subunit-like effector B	12684	ENSMUSG00000022219
1416910_at	-0.5888	Dnajc15	DnaJ (Hsp40) homolog, subfamily C, member 15	66148	ENSMUSG00000022013
1449047_at	-0.5638	Hacl1	2-hydroxyacyl-CoA lyase 1	56794	ENSMUSG00000021884
1440354_at	-0.5999	Elovl7	ELOVL family member 7, elongation of long chain fatty acids (yeast)	74559	ENSMUSG00000021696
1440312_at	-0.6486	Elovl7	ELOVL family member 7, elongation of long chain fatty acids (yeast)	74559	ENSMUSG00000021696
1441091_at	-0.7136	Elovl7	ELOVL family member 7, elongation of long chain fatty acids (yeast)	74559	ENSMUSG00000021696
1448873_at	-0.574	Ocln	occludin	18260	ENSMUSG00000021638
1416027_at	-0.5493	Pdcd6	programmed cell death 6	18570	ENSMUSG00000021576
1455746_at	-0.6482	Kif13a	kinesin family member 13A	16553	ENSMUSG00000021375
1439462_x_at	-0.6394	Tmed10	transmembrane emp24-like trafficking protein 10 (yeast)	68581	ENSMUSG00000021248
1439444_x_at	-0.6591	Tmed10	transmembrane emp24-like trafficking protein 10 (yeast)	68581	ENSMUSG00000021248
1454688_x_at	-0.6637	Tmed10	transmembrane emp24-like trafficking protein 10 (yeast)	68581	ENSMUSG00000021248
1448513_a_at	-0.648	Npc2	Niemann Pick type C2	67963	ENSMUSG00000021242
1416901_at	-0.6563	Npc2	Niemann Pick type C2	67963	ENSMUSG00000021242
1415917_at	-0.5853	Mthfd1	methylenetetrahydrofolate dehydrogenase (NADP+ dependent), methenyltetrahydrofolate cyclohydrolase, formyltetrahydrofolate synthase	108156	ENSMUSG00000021048
1415916_a_at	-0.5683	Mthfd1	methylenetetrahydrofolate dehydrogenase (NADP+ dependent), methenyltetrahydrofolate cyclohydrolase, formyltetrahydrofolate synthase	108156	ENSMUSG00000021048
1428554_a_at	-0.5484	Slirp	SRA stem-loop interacting RNA binding protein	380773	ENSMUSG00000021040
1434432_at	-0.5855	Rffl	ring finger and FYVE like domain containing protein	67338	ENSMUSG00000020696
1452277_at	-0.8142	Arsg	arylsulfatase G	74008	ENSMUSG00000020604
1427002_s_at	-0.718	Arsg	arylsulfatase G	74008	ENSMUSG00000020604
1451117_a_at	-0.5442	Tom1l1	target of myb1-like 1 (chicken)	71943	ENSMUSG00000020541
1426690_a_at	-0.5595	Srebf1	sterol regulatory element binding transcription factor 1	20787	ENSMUSG00000020538
1444186_at	0.5578	Agxt2l2	alanine-glyoxylate aminotransferase 2-like 2	72947	ENSMUSG00000020359
1416060_at	-0.5509	Tbc1d15	TBC1 domain family, member 15	66687	ENSMUSG00000020130
1429065_at	-0.6037	Ikbip	IKBKB interacting protein	67454	ENSMUSG00000019975
1437208_at	-0.6401	Sept10	septin 10	103080	ENSMUSG00000019917
1416271_at	-0.555	Perp	PERP, TP53 apoptosis effector	64058	ENSMUSG00000019851
1424184_at	-0.6235	Acadvl	acyl-Coenzyme A dehydrogenase, very long chain	11370	ENSMUSG00000018574
1422186_s_at	-0.5488	Cyb5r3	cytochrome b5 reductase 3	109754	ENSMUSG00000018042
1436319_at	-0.6776	Sulf1	sulfatase 1	240725	ENSMUSG00000016918
1438200_at	-0.6728	Sulf1	sulfatase 1	240725	ENSMUSG00000016918
1428094_at	-0.6077	Lamp2	lysosomal-associated membrane protein 2	16784	ENSMUSG00000016534
1434503_s_at	-0.6937	Lamp2	lysosomal-associated membrane protein 2	16784	ENSMUSG00000016534
1416344_at	-0.7748	Lamp2	lysosomal-associated membrane protein 2	16784	ENSMUSG00000016534
1417869_s_at	-0.611	Ctsz	cathepsin Z	64138	ENSMUSG00000016256
1455435_s_at	-0.5972	Chdh	choline dehydrogenase	218865	ENSMUSG00000015970
1452637_a_at	-0.5962	Bola1	bolA-like 1 (E. coli)	69168	ENSMUSG00000015943
1416543_at	-0.5965	Nfe2l2	nuclear factor, erythroid derived 2, like 2	18024	ENSMUSG00000015839
1423955_a_at	-0.5812	Lass2	LAG1 homolog, ceramide synthase 2	76893	ENSMUSG00000015714
1438773_at	-0.6775	Steap2	six transmembrane epithelial antigen of prostate 2	74051	ENSMUSG00000015653
1444290_at	-0.5606	Steap2	six transmembrane epithelial antigen of prostate 2	74051	ENSMUSG00000015653
1446071_at	-0.6398	Steap2	six transmembrane epithelial antigen of prostate 2	74051	ENSMUSG00000015653
1442359_at	-0.5785	Steap2	six transmembrane epithelial antigen of prostate 2	74051	ENSMUSG00000015653
1428636_at	-0.6549	Steap2	six transmembrane epithelial antigen of prostate 2	74051	ENSMUSG00000015653
1424938_at	-0.6734	Steap1	six transmembrane epithelial antigen of the prostate 1	70358	ENSMUSG00000015652
1428460_at	0.5534	Syn2	synapsin II	20965	ENSMUSG00000009394
1415897_a_at	-0.7644	Mgst1	microsomal glutathione S-transferase 1	56615	ENSMUSG00000008540
1420641_a_at	-0.6837	Sqrdl	sulfide quinone reductase-like (yeast)	59010	ENSMUSG00000005803
1416203_at	-0.6721	Aqp1	aquaporin 1	11826	ENSMUSG00000004655
1428181_at	-0.6206	Etfb	electron transferring flavoprotein, beta polypeptide	110826	ENSMUSG00000004610
1423627_at	-0.675	Nqo1	NAD(P)H dehydrogenase, quinone 1	18104	ENSMUSG00000003849
1430135_at	-0.6426	Dnase2a	deoxyribonuclease II alpha	13423	ENSMUSG00000003812
1418697_at	-0.6428	Inmt	indolethylamine N-methyltransferase	21743	ENSMUSG00000003477
1416590_a_at	-0.5453	Rab34	RAB34, member of RAS oncogene family	19376	ENSMUSG00000002059
1416591_at	-0.5514	Rab34	RAB34, member of RAS oncogene family	19376	ENSMUSG00000002059
1418186_at	-0.7652	Gstt1	glutathione S-transferase, theta 1	14871	ENSMUSG00000001663
1418986_a_at	-0.6581	Uxt	ubiquitously expressed transcript	22294	ENSMUSG00000001134
1417596_at	-0.5548	B9d1	B9 protein domain 1	27078	ENSMUSG00000001039
1434037_s_at	-0.6105	Kat2b	K(lysine) acetyltransferase 2B	18519	ENSMUSG00000000708
1418412_at	-0.5582	Tpd52l1	tumor protein D52-like 1	21987	ENSMUSG00000000296
cellular component::organelle inner membrane::GO:0019866
C=330;O=23;E=7.29;R=3.15;rawP=1.30e-06;adjP=5.28e-05
Probe Set	r (hipPC1)	Symbol	Name	Entrez ID	Ensemble Gene ID
1420641_a_at	-0.6837	Sqrdl	sulfide quinone reductase-like (yeast)	59010	ENSMUSG00000005803
1415897_a_at	-0.7644	Mgst1	microsomal glutathione S-transferase 1	56615	ENSMUSG00000008540
1455435_s_at	-0.5972	Chdh	choline dehydrogenase	218865	ENSMUSG00000015970
1422186_s_at	-0.5488	Cyb5r3	cytochrome b5 reductase 3	109754	ENSMUSG00000018042
1424184_at	-0.6235	Acadvl	acyl-Coenzyme A dehydrogenase, very long chain	11370	ENSMUSG00000018574
1434866_x_at	-0.6328	Cpt1a	carnitine palmitoyltransferase 1a, liver	12894	ENSMUSG00000024900
1438391_x_at	-0.6344	Hsd17b10	hydroxysteroid (17-beta) dehydrogenase 10	15108	ENSMUSG00000025260
1449218_at	-0.5903	Cox8b	cytochrome c oxidase, subunit VIIIb	12869	ENSMUSG00000025488
1418384_at	-0.6871	Apool	apolipoprotein O-like	68117	ENSMUSG00000025525
1428487_s_at	-0.5514	Coq10b	coenzyme Q10 homolog B (S. cerevisiae)	67876	ENSMUSG00000025981
1416547_at	-0.5491	Ndufb3	NADH dehydrogenase (ubiquinone) 1 beta subcomplex 3	66495	ENSMUSG00000026032
1455972_x_at	-0.5904	Hadh	hydroxyacyl-Coenzyme A dehydrogenase	15107	ENSMUSG00000027984
1416772_at	-0.7366	Cpt2	carnitine palmitoyltransferase 2	12896	ENSMUSG00000028607
1452823_at	-0.8047	Gstk1	glutathione S-transferase kappa 1	76263	ENSMUSG00000029864
1438659_x_at	-0.5956	Chchd6	coiled-coil-helix-coiled-coil-helix domain containing 6	66098	ENSMUSG00000030086
1438656_x_at	-0.6211	Timm17b	translocase of inner mitochondrial membrane 17b	21855	ENSMUSG00000031158
1449108_at	-0.5612	Fdx1	ferredoxin 1	14148	ENSMUSG00000032051
1428146_s_at	-0.6776	Acaa2	acetyl-Coenzyme A acyltransferase 2 (mitochondrial 3-oxoacyl-Coenzyme A thiolase)	52538	ENSMUSG00000036880
1434354_at	-0.6671	Maob	monoamine oxidase B	109731	ENSMUSG00000040147
1429213_at	-0.5532	Ndufaf6	NADH dehydrogenase (ubiquinone) complex I, assembly factor 6	76947	ENSMUSG00000050323
1435275_at	-0.6163	Cox6b2	cytochrome c oxidase subunit VIb polypeptide 2	333182	ENSMUSG00000051811
1437172_x_at	-0.5887	Hadhb	hydroxyacyl-Coenzyme A dehydrogenase/3-ketoacyl-Coenzyme A thiolase/enoyl-Coenzyme A hydratase (trifunctional protein), beta subunit	231086	ENSMUSG00000059447
1418709_at	-0.6463	Cox7a1	cytochrome c oxidase, subunit VIIa 1	12865	ENSMUSG00000074218
cellular component::mitochondrial envelope::GO:0005740
C=446;O=27;E=9.86;R=2.74;rawP=2.38e-06;adjP=8.05e-05
Probe Set	r (hipPC1)	Symbol	Name	Entrez ID	Ensemble Gene ID
1422614_s_at	-0.6642	Bloc1s1	biogenesis of lysosome-related organelles complex-1, subunit 1	14533	ENSMUSG00000090247
1418709_at	-0.6463	Cox7a1	cytochrome c oxidase, subunit VIIa 1	12865	ENSMUSG00000074218
1415984_at	-0.5903	Acadm	acyl-Coenzyme A dehydrogenase, medium chain	11364	ENSMUSG00000062908
1437172_x_at	-0.5887	Hadhb	hydroxyacyl-Coenzyme A dehydrogenase/3-ketoacyl-Coenzyme A thiolase/enoyl-Coenzyme A hydratase (trifunctional protein), beta subunit	231086	ENSMUSG00000059447
1435275_at	-0.6163	Cox6b2	cytochrome c oxidase subunit VIb polypeptide 2	333182	ENSMUSG00000051811
1429213_at	-0.5532	Ndufaf6	NADH dehydrogenase (ubiquinone) complex I, assembly factor 6	76947	ENSMUSG00000050323
1416695_at	-0.6694	Tspo	translocator protein	12257	ENSMUSG00000041736
1456251_x_at	-0.7625	Tspo	translocator protein	12257	ENSMUSG00000041736
1438948_x_at	-0.7676	Tspo	translocator protein	12257	ENSMUSG00000041736
1434354_at	-0.6671	Maob	monoamine oxidase B	109731	ENSMUSG00000040147
1428146_s_at	-0.6776	Acaa2	acetyl-Coenzyme A acyltransferase 2 (mitochondrial 3-oxoacyl-Coenzyme A thiolase)	52538	ENSMUSG00000036880
1449108_at	-0.5612	Fdx1	ferredoxin 1	14148	ENSMUSG00000032051
1438656_x_at	-0.6211	Timm17b	translocase of inner mitochondrial membrane 17b	21855	ENSMUSG00000031158
1438659_x_at	-0.5956	Chchd6	coiled-coil-helix-coiled-coil-helix domain containing 6	66098	ENSMUSG00000030086
1452823_at	-0.8047	Gstk1	glutathione S-transferase kappa 1	76263	ENSMUSG00000029864
1416772_at	-0.7366	Cpt2	carnitine palmitoyltransferase 2	12896	ENSMUSG00000028607
1455972_x_at	-0.5904	Hadh	hydroxyacyl-Coenzyme A dehydrogenase	15107	ENSMUSG00000027984
1416430_at	-0.5913	Cat	catalase	12359	ENSMUSG00000027187
1416547_at	-0.5491	Ndufb3	NADH dehydrogenase (ubiquinone) 1 beta subcomplex 3	66495	ENSMUSG00000026032
1428487_s_at	-0.5514	Coq10b	coenzyme Q10 homolog B (S. cerevisiae)	67876	ENSMUSG00000025981
1418384_at	-0.6871	Apool	apolipoprotein O-like	68117	ENSMUSG00000025525
1449218_at	-0.5903	Cox8b	cytochrome c oxidase, subunit VIIIb	12869	ENSMUSG00000025488
1438391_x_at	-0.6344	Hsd17b10	hydroxysteroid (17-beta) dehydrogenase 10	15108	ENSMUSG00000025260
1434866_x_at	-0.6328	Cpt1a	carnitine palmitoyltransferase 1a, liver	12894	ENSMUSG00000024900
1424184_at	-0.6235	Acadvl	acyl-Coenzyme A dehydrogenase, very long chain	11370	ENSMUSG00000018574
1422186_s_at	-0.5488	Cyb5r3	cytochrome b5 reductase 3	109754	ENSMUSG00000018042
1455435_s_at	-0.5972	Chdh	choline dehydrogenase	218865	ENSMUSG00000015970
1415897_a_at	-0.7644	Mgst1	microsomal glutathione S-transferase 1	56615	ENSMUSG00000008540
1420641_a_at	-0.6837	Sqrdl	sulfide quinone reductase-like (yeast)	59010	ENSMUSG00000005803
cellular component::mitochondrial part::GO:0044429
C=548;O=29;E=12.11;R=2.39;rawP=1.37e-05;adjP=0.0003
Probe Set	r (hipPC1)	Symbol	Name	Entrez ID	Ensemble Gene ID
1428181_at	-0.6206	Etfb	electron transferring flavoprotein, beta polypeptide	110826	ENSMUSG00000004610
1420641_a_at	-0.6837	Sqrdl	sulfide quinone reductase-like (yeast)	59010	ENSMUSG00000005803
1415897_a_at	-0.7644	Mgst1	microsomal glutathione S-transferase 1	56615	ENSMUSG00000008540
1455435_s_at	-0.5972	Chdh	choline dehydrogenase	218865	ENSMUSG00000015970
1422186_s_at	-0.5488	Cyb5r3	cytochrome b5 reductase 3	109754	ENSMUSG00000018042
1424184_at	-0.6235	Acadvl	acyl-Coenzyme A dehydrogenase, very long chain	11370	ENSMUSG00000018574
1434866_x_at	-0.6328	Cpt1a	carnitine palmitoyltransferase 1a, liver	12894	ENSMUSG00000024900
1438391_x_at	-0.6344	Hsd17b10	hydroxysteroid (17-beta) dehydrogenase 10	15108	ENSMUSG00000025260
1449218_at	-0.5903	Cox8b	cytochrome c oxidase, subunit VIIIb	12869	ENSMUSG00000025488
1418384_at	-0.6871	Apool	apolipoprotein O-like	68117	ENSMUSG00000025525
1428487_s_at	-0.5514	Coq10b	coenzyme Q10 homolog B (S. cerevisiae)	67876	ENSMUSG00000025981
1416547_at	-0.5491	Ndufb3	NADH dehydrogenase (ubiquinone) 1 beta subcomplex 3	66495	ENSMUSG00000026032
1416430_at	-0.5913	Cat	catalase	12359	ENSMUSG00000027187
1455972_x_at	-0.5904	Hadh	hydroxyacyl-Coenzyme A dehydrogenase	15107	ENSMUSG00000027984
1416772_at	-0.7366	Cpt2	carnitine palmitoyltransferase 2	12896	ENSMUSG00000028607
1452823_at	-0.8047	Gstk1	glutathione S-transferase kappa 1	76263	ENSMUSG00000029864
1438659_x_at	-0.5956	Chchd6	coiled-coil-helix-coiled-coil-helix domain containing 6	66098	ENSMUSG00000030086
1438656_x_at	-0.6211	Timm17b	translocase of inner mitochondrial membrane 17b	21855	ENSMUSG00000031158
1449108_at	-0.5612	Fdx1	ferredoxin 1	14148	ENSMUSG00000032051
1428146_s_at	-0.6776	Acaa2	acetyl-Coenzyme A acyltransferase 2 (mitochondrial 3-oxoacyl-Coenzyme A thiolase)	52538	ENSMUSG00000036880
1434354_at	-0.6671	Maob	monoamine oxidase B	109731	ENSMUSG00000040147
1416695_at	-0.6694	Tspo	translocator protein	12257	ENSMUSG00000041736
1456251_x_at	-0.7625	Tspo	translocator protein	12257	ENSMUSG00000041736
1438948_x_at	-0.7676	Tspo	translocator protein	12257	ENSMUSG00000041736
1452256_at	-0.5549	1110002N22Rik	RIKEN cDNA 1110002N22 gene	68550	ENSMUSG00000046909
1429213_at	-0.5532	Ndufaf6	NADH dehydrogenase (ubiquinone) complex I, assembly factor 6	76947	ENSMUSG00000050323
1435275_at	-0.6163	Cox6b2	cytochrome c oxidase subunit VIb polypeptide 2	333182	ENSMUSG00000051811
1437172_x_at	-0.5887	Hadhb	hydroxyacyl-Coenzyme A dehydrogenase/3-ketoacyl-Coenzyme A thiolase/enoyl-Coenzyme A hydratase (trifunctional protein), beta subunit	231086	ENSMUSG00000059447
1415984_at	-0.5903	Acadm	acyl-Coenzyme A dehydrogenase, medium chain	11364	ENSMUSG00000062908
1418709_at	-0.6463	Cox7a1	cytochrome c oxidase, subunit VIIa 1	12865	ENSMUSG00000074218
1422614_s_at	-0.6642	Bloc1s1	biogenesis of lysosome-related organelles complex-1, subunit 1	14533	ENSMUSG00000090247
cellular component::mitochondrial membrane::GO:0031966
C=424;O=25;E=9.37;R=2.67;rawP=8.95e-06;adjP=0.0003
Probe Set	r (hipPC1)	Symbol	Name	Entrez ID	Ensemble Gene ID
1418709_at	-0.6463	Cox7a1	cytochrome c oxidase, subunit VIIa 1	12865	ENSMUSG00000074218
1415984_at	-0.5903	Acadm	acyl-Coenzyme A dehydrogenase, medium chain	11364	ENSMUSG00000062908
1437172_x_at	-0.5887	Hadhb	hydroxyacyl-Coenzyme A dehydrogenase/3-ketoacyl-Coenzyme A thiolase/enoyl-Coenzyme A hydratase (trifunctional protein), beta subunit	231086	ENSMUSG00000059447
1435275_at	-0.6163	Cox6b2	cytochrome c oxidase subunit VIb polypeptide 2	333182	ENSMUSG00000051811
1429213_at	-0.5532	Ndufaf6	NADH dehydrogenase (ubiquinone) complex I, assembly factor 6	76947	ENSMUSG00000050323
1416695_at	-0.6694	Tspo	translocator protein	12257	ENSMUSG00000041736
1456251_x_at	-0.7625	Tspo	translocator protein	12257	ENSMUSG00000041736
1438948_x_at	-0.7676	Tspo	translocator protein	12257	ENSMUSG00000041736
1434354_at	-0.6671	Maob	monoamine oxidase B	109731	ENSMUSG00000040147
1428146_s_at	-0.6776	Acaa2	acetyl-Coenzyme A acyltransferase 2 (mitochondrial 3-oxoacyl-Coenzyme A thiolase)	52538	ENSMUSG00000036880
1449108_at	-0.5612	Fdx1	ferredoxin 1	14148	ENSMUSG00000032051
1438656_x_at	-0.6211	Timm17b	translocase of inner mitochondrial membrane 17b	21855	ENSMUSG00000031158
1438659_x_at	-0.5956	Chchd6	coiled-coil-helix-coiled-coil-helix domain containing 6	66098	ENSMUSG00000030086
1452823_at	-0.8047	Gstk1	glutathione S-transferase kappa 1	76263	ENSMUSG00000029864
1416772_at	-0.7366	Cpt2	carnitine palmitoyltransferase 2	12896	ENSMUSG00000028607
1455972_x_at	-0.5904	Hadh	hydroxyacyl-Coenzyme A dehydrogenase	15107	ENSMUSG00000027984
1416547_at	-0.5491	Ndufb3	NADH dehydrogenase (ubiquinone) 1 beta subcomplex 3	66495	ENSMUSG00000026032
1428487_s_at	-0.5514	Coq10b	coenzyme Q10 homolog B (S. cerevisiae)	67876	ENSMUSG00000025981
1418384_at	-0.6871	Apool	apolipoprotein O-like	68117	ENSMUSG00000025525
1449218_at	-0.5903	Cox8b	cytochrome c oxidase, subunit VIIIb	12869	ENSMUSG00000025488
1438391_x_at	-0.6344	Hsd17b10	hydroxysteroid (17-beta) dehydrogenase 10	15108	ENSMUSG00000025260
1434866_x_at	-0.6328	Cpt1a	carnitine palmitoyltransferase 1a, liver	12894	ENSMUSG00000024900
1424184_at	-0.6235	Acadvl	acyl-Coenzyme A dehydrogenase, very long chain	11370	ENSMUSG00000018574
1422186_s_at	-0.5488	Cyb5r3	cytochrome b5 reductase 3	109754	ENSMUSG00000018042
1455435_s_at	-0.5972	Chdh	choline dehydrogenase	218865	ENSMUSG00000015970
1415897_a_at	-0.7644	Mgst1	microsomal glutathione S-transferase 1	56615	ENSMUSG00000008540
1420641_a_at	-0.6837	Sqrdl	sulfide quinone reductase-like (yeast)	59010	ENSMUSG00000005803
cellular component::extracellular region part::GO:0044421
C=928;O=39;E=20.51;R=1.90;rawP=8.96e-05;adjP=0.0018
Probe Set	r (hipPC1)	Symbol	Name	Entrez ID	Ensemble Gene ID
1417552_at	-0.7236	Fap	fibroblast activation protein	14089	ENSMUSG00000000392
1456590_x_at	-0.6204	Akr1b3	aldo-keto reductase family 1, member B3 (aldose reductase)	11677	ENSMUSG00000001642
1437133_x_at	-0.5672	Akr1b3	aldo-keto reductase family 1, member B3 (aldose reductase)	11677	ENSMUSG00000001642
1448319_at	-0.55	Akr1b3	aldo-keto reductase family 1, member B3 (aldose reductase)	11677	ENSMUSG00000001642
1416203_at	-0.6721	Aqp1	aquaporin 1	11826	ENSMUSG00000004655
1448550_at	-0.6648	Lbp	lipopolysaccharide binding protein	16803	ENSMUSG00000016024
1417869_s_at	-0.611	Ctsz	cathepsin Z	64138	ENSMUSG00000016256
1436319_at	-0.6776	Sulf1	sulfatase 1	240725	ENSMUSG00000016918
1438200_at	-0.6728	Sulf1	sulfatase 1	240725	ENSMUSG00000016918
1416635_at	-0.6132	Smpdl3a	sphingomyelin phosphodiesterase, acid-like 3A	57319	ENSMUSG00000019872
1448200_at	-0.5811	Tcn2	transcobalamin 2	21452	ENSMUSG00000020432
1447800_x_at	-0.6694	Tcn2	transcobalamin 2	21452	ENSMUSG00000020432
1457825_x_at	-0.7479	Tcn2	transcobalamin 2	21452	ENSMUSG00000020432
1452277_at	-0.8142	Arsg	arylsulfatase G	74008	ENSMUSG00000020604
1427002_s_at	-0.718	Arsg	arylsulfatase G	74008	ENSMUSG00000020604
1423516_a_at	-0.5613	Nid2	nidogen 2	18074	ENSMUSG00000021806
1448136_at	-0.6153	Enpp2	ectonucleotide pyrophosphatase/phosphodiesterase 2	18606	ENSMUSG00000022425
1438312_s_at	-0.5481	Ltbp3	latent transforming growth factor beta binding protein 3	16998	ENSMUSG00000024940
1418049_at	-0.5577	Ltbp3	latent transforming growth factor beta binding protein 3	16998	ENSMUSG00000024940
1435731_x_at	-0.5604	Prdx4	peroxiredoxin 4	53381	ENSMUSG00000025289
1416166_a_at	-0.6828	Prdx4	peroxiredoxin 4	53381	ENSMUSG00000025289
1416167_at	-0.6844	Prdx4	peroxiredoxin 4	53381	ENSMUSG00000025289
1423261_at	-0.6734	1500015O10Rik	RIKEN cDNA 1500015O10 gene	78896	ENSMUSG00000026051
1460049_s_at	-0.6571	1500015O10Rik	RIKEN cDNA 1500015O10 gene	78896	ENSMUSG00000026051
1449269_at	-0.6798	F5	coagulation factor V	14067	ENSMUSG00000026579
1418907_at	-0.6835	F5	coagulation factor V	14067	ENSMUSG00000026579
1460734_at	-0.6589	Col9a3	collagen, type IX, alpha 3	12841	ENSMUSG00000027570
1460693_a_at	-0.7342	Col9a3	collagen, type IX, alpha 3	12841	ENSMUSG00000027570
1420280_x_at	-0.5648	Col9a3	collagen, type IX, alpha 3	12841	ENSMUSG00000027570
1423606_at	-0.5595	Postn	periostin, osteoblast specific factor	50706	ENSMUSG00000027750
1448162_at	-0.6505	Vcam1	vascular cell adhesion molecule 1	22329	ENSMUSG00000027962
1437165_a_at	-0.682	Pcolce	procollagen C-endopeptidase enhancer protein	18542	ENSMUSG00000029718
1448433_a_at	-0.5981	Pcolce	procollagen C-endopeptidase enhancer protein	18542	ENSMUSG00000029718
1428136_at	-0.562	Sfrp1	secreted frizzled-related protein 1	20377	ENSMUSG00000031548
1456532_at	-0.598	Pdgfd	platelet-derived growth factor, D polypeptide	71785	ENSMUSG00000032006
1448123_s_at	-0.6938	Tgfbi	transforming growth factor, beta induced	21810	ENSMUSG00000035493
1415871_at	-0.5824	Tgfbi	transforming growth factor, beta induced	21810	ENSMUSG00000035493
1437463_x_at	-0.5427	Tgfbi	transforming growth factor, beta induced	21810	ENSMUSG00000035493
1456250_x_at	-0.6188	Tgfbi	transforming growth factor, beta induced	21810	ENSMUSG00000035493
1449340_at	-0.6419	Sostdc1	sclerostin domain containing 1	66042	ENSMUSG00000036169
1460250_at	-0.6125	Sostdc1	sclerostin domain containing 1	66042	ENSMUSG00000036169
1451201_s_at	-0.6534	Rnh1	ribonuclease/angiogenin inhibitor 1	107702	ENSMUSG00000038650
1450759_at	-0.6593	Bmp6	bone morphogenetic protein 6	12161	ENSMUSG00000039004
1416441_at	-0.7772	Pgcp	plasma glutamate carboxypeptidase	54381	ENSMUSG00000039007
1454159_a_at	-0.6496	Igfbp2	insulin-like growth factor binding protein 2	16008	ENSMUSG00000039323
1416321_s_at	-0.6915	Prelp	proline arginine-rich end leucine-rich repeat	116847	ENSMUSG00000041577
1416318_at	-0.6421	Serpinb1a	serine (or cysteine) peptidase inhibitor, clade B, member 1a	66222	ENSMUSG00000044734
1448152_at	-0.5496	Igf2	insulin-like growth factor 2	16002	ENSMUSG00000048583
1439190_at	-0.578	Fhad1	forkhead-associated (FHA) phosphopeptide binding domain 1	329977	ENSMUSG00000051435
1417962_s_at	-0.5639	Ghr	growth hormone receptor	14600	ENSMUSG00000055737
1434667_at	-0.71	Col8a2	collagen, type VIII, alpha 2	329941	ENSMUSG00000056174
1425644_at	-0.6631	Lepr	leptin receptor	16847	ENSMUSG00000057722
1456156_at	-0.6995	Lepr	leptin receptor	16847	ENSMUSG00000057722
1451580_a_at	-0.5528	Ttr	transthyretin	22139	ENSMUSG00000061808
1445328_at	-0.6351	Col4a4	collagen, type IV, alpha 4	12829	ENSMUSG00000067158
1455627_at	-0.6813	Col8a1	collagen, type VIII, alpha 1	12837	ENSMUSG00000068196
1418440_at	-0.5936	Col8a1	collagen, type VIII, alpha 1	12837	ENSMUSG00000068196
1419573_a_at	-0.6785	Lgals1	lectin, galactose binding, soluble 1	16852	ENSMUSG00000068220
1455439_a_at	-0.7389	Lgals1	lectin, galactose binding, soluble 1	16852	ENSMUSG00000068220
1419595_a_at	-0.6117	Ggh	gamma-glutamyl hydrolase	14590	ENSMUSG00000073987
cellular component::peroxisome::GO:0005777
C=128;O=11;E=2.83;R=3.89;rawP=0.0001;adjP=0.0018
Probe Set	r (hipPC1)	Symbol	Name	Entrez ID	Ensemble Gene ID
1421938_at	-0.6774	Serhl	serine hydrolase-like	68607	ENSMUSG00000058586
1448491_at	-0.6609	Ech1	enoyl coenzyme A hydratase 1, peroxisomal	51798	ENSMUSG00000053898
1451277_at	-0.7099	Zadh2	zinc binding alcohol dehydrogenase, domain containing 2	225791	ENSMUSG00000049090
1431302_a_at	-0.6394	Nudt7	nudix (nucleoside diphosphate linked moiety X)-type motif 7	67528	ENSMUSG00000031767
1452823_at	-0.8047	Gstk1	glutathione S-transferase kappa 1	76263	ENSMUSG00000029864
1416430_at	-0.5913	Cat	catalase	12359	ENSMUSG00000027187
1460194_at	-0.5721	Phyh	phytanoyl-CoA hydroxylase	16922	ENSMUSG00000026664
1448910_at	-0.5795	Pecr	peroxisomal trans-2-enoyl-CoA reductase	111175	ENSMUSG00000026189
1453139_at	-0.6135	Nudt12	nudix (nucleoside diphosphate linked moiety X)-type motif 12	67993	ENSMUSG00000024228
1449047_at	-0.5638	Hacl1	2-hydroxyacyl-CoA lyase 1	56794	ENSMUSG00000021884
1415897_a_at	-0.7644	Mgst1	microsomal glutathione S-transferase 1	56615	ENSMUSG00000008540
